# Supplementary material for: Methylations with Methanol via Bioinspired Catalytic C–O bond Cleavage
Source: Research Square preprint supplement (doi:10.21203/rs.3.rs-5122663/v1), 2025-02-12
Supplement: Supplementary file 1 [file d2c72c65a96627685d16ce1b.pdf]

# Supporting Information

## **Methylations with Methanol via Bioinspired Catalytic C–O Bond Cleavage**

Qing Huang,<sup>1</sup> Yao Xiang,<sup>1</sup> Yaqi Wu,<sup>1</sup> Yuzhu Zheng,<sup>1</sup> Rong-Zhen Liao,<sup>1\*</sup> & Youwei Xie<sup>1\*</sup>

<sup>1</sup>Hubei Key Laboratory of Bioinorganic Chemistry and Materia Medica; School of Chemistry and Chemical Engineering, Huazhong University of Science and Technology, 1037 Luoyu Road, Wuhan, 430074, China

\*e-mail: rongzhen@hust.edu.cn, xieyw@hust.edu.cn

## Table of contents

|                                                                                                                                  |     |
|----------------------------------------------------------------------------------------------------------------------------------|-----|
| 1 General information .....                                                                                                      | 3   |
| 2 Optimization of reaction conditions for Methylation/d <sub>3</sub> -methylation with<br>MeOH/MeOH- <i>d</i> <sub>3</sub> ..... | 4   |
| 3 Additional substrate scope .....                                                                                               | 9   |
| 4 Syntheses of starting materials and spectroscopic data .....                                                                   | 10  |
| 5 General procedure for the Alkylation and Characterization of Alkylation Products. ....                                         | 13  |
| 6 Synthetic applications and spectroscopic data .....                                                                            | 56  |
| 6.1 Pridopidine derivatives .....                                                                                                | 56  |
| 6.2 HIV virus inhibitor analogs .....                                                                                            | 58  |
| 6.3 Derivatization of 2g .....                                                                                                   | 60  |
| 6.4 Ethylation with ethanol .....                                                                                                | 62  |
| 6.5 Synthetic applications of monomethylation of benzene diols .....                                                             | 63  |
| 7 Mechanistic experiments .....                                                                                                  | 66  |
| 7.1 Possibility of TfOH formation that leads to catalysis .....                                                                  | 66  |
| 7.2 Possibility of methyl sulfonates as a key intermediate .....                                                                 | 66  |
| 7.3 Kinetic Studies in HFIP .....                                                                                                | 69  |
| 7.4 Kinetic Studies in Hexane .....                                                                                              | 73  |
| 7.5 Hammett plot .....                                                                                                           | 79  |
| 7.6 DFT calculations .....                                                                                                       | 81  |
| 8 NMR spectroscopic data .....                                                                                                   | 83  |
| 9 Reference .....                                                                                                                | 194 |

## 1 General information

Unless otherwise stated, all chemicals used in this manuscript were purchased from Energy chemical company, Bide Pharmatech Ltd, Inno-Chem Ltd, Adamas Company, Sigma Aldrich and Alfa Aesar Company. Other commercially available compounds were used as provided without further purification. HFIP used in the reactions were dried from anhydrous  $\text{Mg}_2\text{SO}_4$  and distilled in  $\text{N}_2$  prior to use. Other solvents are used after processing in accordance with conventional methods. Unless otherwise noted, all reactions were performed under  $\text{N}_2$  atmosphere. Reactions were monitored by thin layer chromatography (TLC) on silica gel pre-coated plastic sheets (0.2 mm). Visualization was accomplished by irradiation with *p*-methoxybenzaldehyde, ultraviolet lamp (254 nm), alkaline potassium permanganate solution, iodine cylinder and phosphomolybdic acid solution. Flash column chromatography was performed over silica gel (200-300 mesh). The nuclear magnetic resonance data in this paper is measured by Bruker AVANCE III-400 or Bruker Ascend™ 600MHz nuclear magnetic resonance instrument at room temperature. Chemical shifts were reported in ppm on the scale relative to  $\text{CDCl}_3$  ( $\delta = 7.26$  for  $^1\text{H}$ -NMR,  $\delta = 77.16$  for  $^{13}\text{C}$ -NMR). Proton spectrum description analysis is as follows: chemical shift (ppm), multiplet analysis (s = singlet, d = doublet, t = triplet, q = quartet, m = multiplet), unidentified coupling the methods are all analyzed by multiple peak processing, and the carbon spectrum is described in ppm. Coupling constants ( $J$ ) were reported in Hertz (Hz). High resolution mass spectra (HR-MS) were determined on Bruker Solarix 7.0T FT-MS (ESI source). Mass spectra (GC-MS) were determined on Agilent 7890A/5975C (EI source)

## 2 Optimization of reaction conditions for Methylation/*d*<sub>3</sub>-methylation with MeOH/MeOH-*d*<sub>3</sub>

**Table S1. Acid screening**

Clc1ccc(S)cc1 (1a) + MeOH  $\xrightarrow[\text{HFIP}]{\text{Cat. (10 mol\%)}}$  Clc1ccc(SMe)cc1 (2a)

| Entry | Additive | Cat.   | Solvent | T (°C) | t (h) | 2a |
|-------|----------|--------|---------|--------|-------|----|
| 1     | -        | cat.1  | HFIP    | 150    | 24    | 27 |
| 2     | -        | cat.2  | HFIP    | 150    | 24    | 40 |
| 3     | -        | cat.3  | HFIP    | 150    | 24    | 27 |
| 4     | -        | cat.4  | HFIP    | 150    | 24    | 35 |
| 5     | -        | cat.5  | HFIP    | 150    | 24    | 37 |
| 6     | -        | cat.6  | HFIP    | 150    | 24    | 0  |
| 7     | -        | cat.7  | HFIP    | 150    | 24    | 0  |
| 8     | -        | cat.8  | HFIP    | 150    | 24    | 8  |
| 9     | -        | cat.9  | HFIP    | 150    | 24    | 13 |
| 10    | -        | cat.10 | HFIP    | 150    | 24    | 36 |
| 11    | -        | cat.11 | HFIP    | 150    | 24    | 15 |
| 12    | -        | cat.12 | HFIP    | 150    | 24    | 0  |
| 13    | -        | cat.13 | HFIP    | 150    | 24    | 9  |
| 14    | -        | cat.14 | HFIP    | 150    | 24    | 13 |
| 15    | -        | cat.15 | HFIP    | 150    | 24    | 32 |

Unless mentioned otherwise, reactions were performed with **1a** (1.0 equiv.), MeOH (2.0 equiv.), HFIP (0.4 M), **Cat.** (10 mol%) at 150 °C for 24 hours. <sup>a</sup>Yields were determined by analyzing <sup>1</sup>H NMR of the reaction mixture with an internal standard.

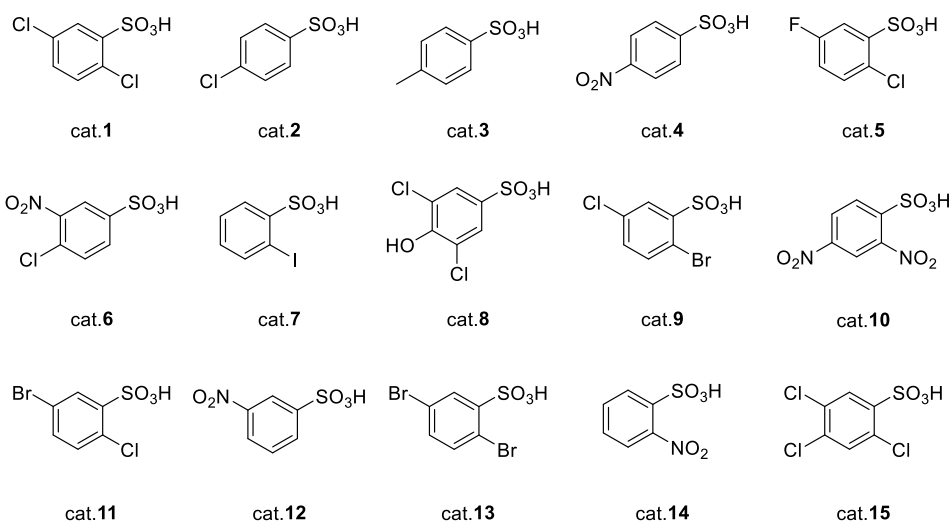



**Table S2. Additive screening**

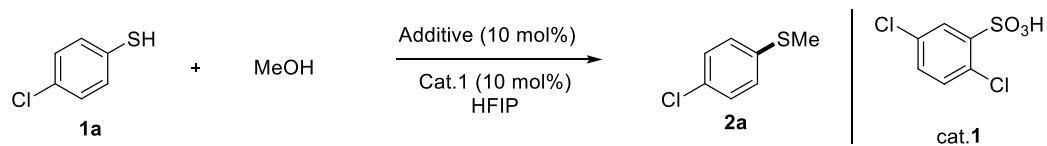

| Entry | Additive                                        | Cat.  | Solvent | T (°C) | t (h) | 2a                  |
|-------|-------------------------------------------------|-------|---------|--------|-------|---------------------|
| 1     | ZnCl <sub>2</sub>                               | cat.1 | HFIP    | 150    | 24    | 80                  |
| 2     | ZnBr <sub>2</sub>                               | cat.1 | HFIP    | 150    | 24    | 88                  |
| 3     | ZnF <sub>2</sub>                                | cat.1 | HFIP    | 150    | 24    | 0                   |
| 4     | Zn(OTf) <sub>2</sub>                            | cat.1 | HFIP    | 150    | 24    | 98(90) <sup>b</sup> |
| 5     | ZnSO <sub>4</sub>                               | cat.1 | HFIP    | 150    | 24    | 78                  |
| 6     | Zn(OAc) <sub>2</sub>                            | cat.1 | HFIP    | 150    | 24    | 0                   |
| 7     | Zn(BF <sub>4</sub> ) <sub>2</sub>               | cat.1 | HFIP    | 150    | 24    | 34                  |
| 8     | Zn(CN) <sub>2</sub>                             | cat.1 | HFIP    | 150    | 24    | 0                   |
| 9     | Zn(BO <sub>4</sub> ) <sub>2</sub>               | cat.1 | HFIP    | 150    | 24    | 48                  |
| 10    | Zn <sub>3</sub> (PO <sub>4</sub> ) <sub>2</sub> | cat.1 | HFIP    | 150    | 24    | 54                  |
| 11    | Ba(OTf) <sub>3</sub>                            | cat.1 | HFIP    | 150    | 24    | 43                  |
| 12    | Mg(OTf) <sub>2</sub>                            | cat.1 | HFIP    | 150    | 24    | 50                  |
| 13    | Cu(OTf) <sub>2</sub>                            | cat.1 | HFIP    | 150    | 24    | 28                  |
| 14    | Ni(OTf) <sub>2</sub>                            | cat.1 | HFIP    | 150    | 24    | 47                  |

Unless mentioned otherwise, reactions were performed with **1** (1.0 equiv.), MeOH (2.0 equiv.), HFIP (0.4 M), **Cat.1** (10 mol%), Additive (10 mol%) at 150 °C for 24 hours. <sup>a</sup> Yields were determined by analyzing <sup>1</sup>H NMR of the reaction mixture with an internal standard. <sup>b</sup> Isolated yield.

**Table S3. Acid screening + Zn(OTf)<sub>2</sub>**

Clc1ccc(S)cc1 (1a) + MeOH  $\xrightarrow[\text{Cat. (10 mol\%)}]{\text{Zn(OTf)}_2(10 \text{ mol\%})}$  Clc1ccc(SMe)cc1 (2a)

| Entry | Additive             | Cat.   | Solvent | T (°C) | t (h) | 2a                  |
|-------|----------------------|--------|---------|--------|-------|---------------------|
| 1     | Zn(OTf) <sub>2</sub> | cat.1  | HFIP    | 150    | 24    | 98(90) <sup>b</sup> |
| 2     | Zn(OTf) <sub>2</sub> | cat.2  | HFIP    | 150    | 24    | 43                  |
| 3     | Zn(OTf) <sub>2</sub> | cat.3  | HFIP    | 150    | 24    | 39                  |
| 4     | Zn(OTf) <sub>2</sub> | cat.4  | HFIP    | 150    | 24    | 0                   |
| 5     | Zn(OTf) <sub>2</sub> | cat.5  | HFIP    | 150    | 24    | 33                  |
| 6     | Zn(OTf) <sub>2</sub> | cat.6  | HFIP    | 150    | 24    | 48                  |
| 7     | Zn(OTf) <sub>2</sub> | cat.7  | HFIP    | 150    | 24    | 30                  |
| 8     | Zn(OTf) <sub>2</sub> | cat.8  | HFIP    | 150    | 24    | 66                  |
| 9     | Zn(OTf) <sub>2</sub> | cat.9  | HFIP    | 150    | 24    | 50                  |
| 10    | Zn(OTf) <sub>2</sub> | cat.10 | HFIP    | 150    | 24    | 55                  |
| 11    | Zn(OTf) <sub>2</sub> | cat.11 | HFIP    | 150    | 24    | 0                   |
| 12    | Zn(OTf) <sub>2</sub> | cat.12 | HFIP    | 150    | 24    | 0                   |
| 13    | Zn(OTf) <sub>2</sub> | cat.13 | HFIP    | 150    | 24    | 88                  |
| 14    | Zn(OTf) <sub>2</sub> | cat.14 | HFIP    | 150    | 24    | 92                  |
| 15    | Zn(OTf) <sub>2</sub> | cat.15 | HFIP    | 150    | 24    | 97                  |
| 16    | Zn(OTf) <sub>2</sub> | cat.16 | HFIP    | 150    | 24    | 97                  |
| 17    | Zn(OTf) <sub>2</sub> | cat.17 | HFIP    | 150    | 24    | 57                  |

Unless mentioned otherwise, reactions were performed with **1a** (1.0 equiv.), MeOH (2.0 equiv.), HFIP (0.4 M), **Cat.** (10 mol%), Zn(OTf)<sub>2</sub> (10 mol%) at 150 °C for 24 hours. <sup>a</sup> Yields were determined by analyzing <sup>1</sup>H NMR of the reaction mixture with an internal standard. <sup>b</sup> Isolated yield.

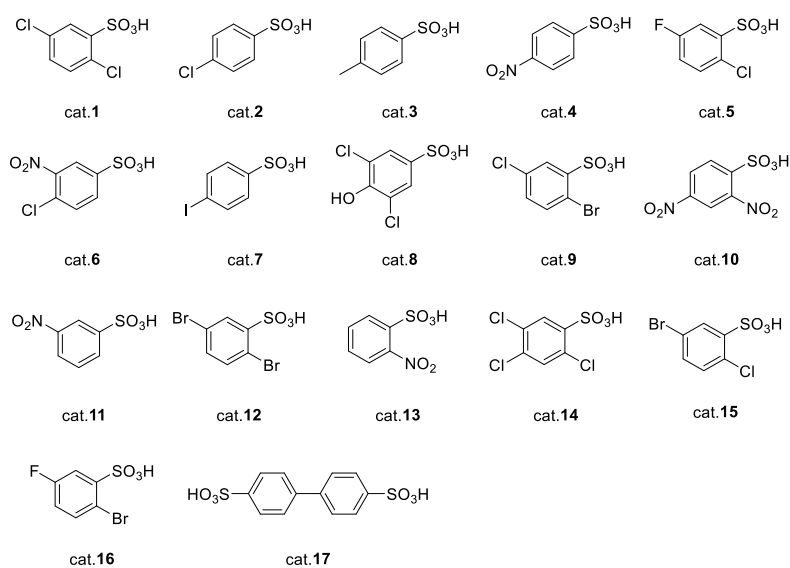

**Table S4. Solvent screening**

Clc1ccc(S)cc1 (**1a**) + MeOH  $\xrightarrow[\text{Cat. (10 mol\%)\ Solvent}]{\text{Zn(OTf)}_2 \text{ (10 mol\%)}}$  Clc1ccc(SMe)cc1 (**2a**)

| Entry | Additive             | Cat.          | Solvent            | T (°C) | t (h) | <b>2a</b>           |
|-------|----------------------|---------------|--------------------|--------|-------|---------------------|
| 1     | Zn(OTf) <sub>2</sub> | cat. <b>1</b> | HFIP               | 150    | 24    | 98(90) <sup>b</sup> |
| 2     | Zn(OTf) <sub>2</sub> | cat. <b>1</b> | DCE                | 150    | 24    | 29                  |
| 3     | Zn(OTf) <sub>2</sub> | cat. <b>1</b> | toluene            | 150    | 24    | 0                   |
| 4     | Zn(OTf) <sub>2</sub> | cat. <b>1</b> | dioxane            | 150    | 24    | 11                  |
| 5     | Zn(OTf) <sub>2</sub> | cat. <b>1</b> | hexane             | 150    | 24    | 27                  |
| 6     | Zn(OTf) <sub>2</sub> | cat. <b>1</b> | cyclohexan         | 150    | 24    | 31                  |
| 7     | Zn(OTf) <sub>2</sub> | cat. <b>1</b> | DMSO               | 150    | 24    | 0                   |
| 8     | Zn(OTf) <sub>2</sub> | cat. <b>1</b> | CH <sub>3</sub> CN | 150    | 24    | 27                  |
| 9     | Zn(OTf) <sub>2</sub> | cat. <b>1</b> | THF                | 150    | 24    | 39                  |
| 10    | Zn(OTf) <sub>2</sub> | cat. <b>1</b> | DCM                | 150    | 24    | 0                   |
| 11    | Zn(OTf) <sub>2</sub> | cat. <b>1</b> | CDCl <sub>3</sub>  | 150    | 24    | 38                  |
| 12    | Zn(OTf) <sub>2</sub> | cat. <b>1</b> | hexane             | 150    | 24    | 98 <sup>c</sup>     |
| 13    | Zn(OTf) <sub>2</sub> | cat. <b>1</b> | hexane             | 150    | 24    | 79 <sup>d</sup>     |
| 14    | Zn(OTf) <sub>2</sub> | cat. <b>1</b> | hexane             | 150    | 24    | 85 <sup>e</sup>     |

Unless mentioned otherwise, reactions were performed with **1a** (1.0 equiv.), MeOH (2.0 equiv.), HFIP (0.4 M), **Cat.1** (10 mol%), Zn(OTf)<sub>2</sub> (10 mol%) at 150 °C for 24 hours.

<sup>a</sup> Yields were determined by analyzing <sup>1</sup>H NMR of the reaction mixture with an internal standard. <sup>b</sup> Isolated yield. <sup>c</sup> MeOH (5.0 equiv.) was used. <sup>d</sup> MeOH (3.0 equiv.) was used.

<sup>e</sup> MeOH (4.0 equiv.) was used.

**Table S5. Other screening**

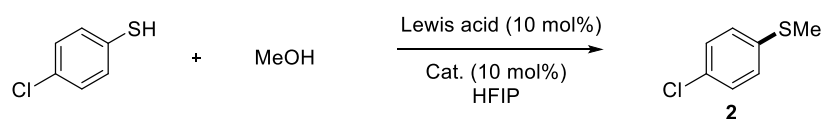

| Entry | Additive                       | Cat.                    | Solvent | T (°C) | t (h) | <b>2</b>            |
|-------|--------------------------------|-------------------------|---------|--------|-------|---------------------|
| 1     | Zn(OTf) <sub>2</sub>           | -                       | HFIP    | 150    | 24    | 31                  |
| 2     | -                              | cat. <b>1</b>           | HFIP    | 150    | 24    | 27                  |
| 3     | Zn(OTf) <sub>2</sub>           | cat. <b>1</b>           | HFIP    | 100    | 24    | 0                   |
| 4     | Zn(OTf) <sub>2</sub>           | cat. <b>1</b>           | HFIP    | 120    | 24    | 35                  |
| 5     | Zn(OTf) <sub>2</sub>           | cat. <b>1</b>           | HFIP    | 130    | 24    | 44                  |
| 6     | Zn(OTf) <sub>2</sub>           | cat. <b>1</b>           | HFIP    | 140    | 24    | 86                  |
| 7     | Zn(OTf) <sub>2</sub>           | cat. <b>1</b>           | HFIP    | 150    | 2     | 19                  |
| 8     | Zn(OTf) <sub>2</sub>           | cat. <b>9</b>           | HFIP    | 150    | 4     | 24                  |
| 9     | Zn(OTf) <sub>2</sub>           | cat. <b>10</b>          | HFIP    | 150    | 6     | 30                  |
| 10    | Zn(OTf) <sub>2</sub>           | cat. <b>11</b>          | HFIP    | 150    | 8     | 31                  |
| 11    | Zn(OTf) <sub>2</sub>           | cat. <b>12</b>          | HFIP    | 150    | 10    | 81                  |
| 12    | Zn(OTf) <sub>2</sub>           | cat. <b>13</b>          | HFIP    | 150    | 12    | 84                  |
| 13    | Zn(OTf) <sub>2</sub> (5 mol%)  | cat. <b>1</b> (10 mol%) | HFIP    | 150    | 24    | 88                  |
| 14    | Zn(OTf) <sub>2</sub> (5 mol%)  | cat. <b>1</b> (5 mol%)  | HFIP    | 150    | 24    | 90                  |
| 15    | Zn(OTf) <sub>2</sub> (10 mol%) | cat. <b>1</b> (5 mol%)  | HFIP    | 150    | 24    | 95                  |
| 16    | Zn(OTf) <sub>2</sub> (10 mol%) | cat. <b>1</b> (10 mol%) | HFIP    | 150    | 24    | 98(90) <sup>b</sup> |

Unless mentioned otherwise, reactions were performed with **1a** (1.0 equiv.), MeOH (2.0 equiv.), HFIP (0.4 M), **Cat.1** (10 mol%), Zn(OTf)<sub>2</sub> (10 mol%) at 150 °C for 24 hours.

<sup>a</sup> Yields were determined by analyzing <sup>1</sup>H NMR of the reaction mixture with an internal standard. <sup>b</sup> Isolated yield.

### 3 Additional substrate scope

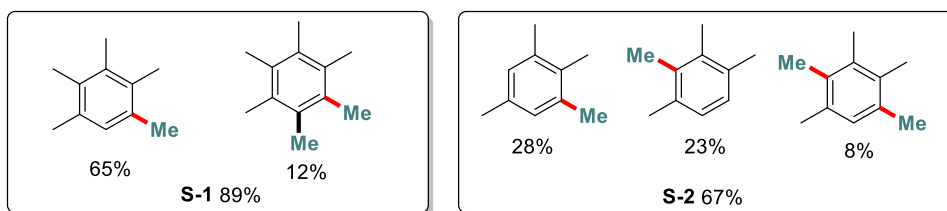

## 4 Syntheses of starting materials and spectroscopic data

All substrates were prepared following the literature procedures or the procedures provided in this manuscript.  $^1\text{H}$  NMR,  $^{13}\text{C}$  NMR,  $^{19}\text{F}$ -NMR, and HRMS were provided for all compounds not previously reported, for cases where HRMS were not obtained after several tries, GC-MS was provided. Only  $^1\text{H}$  NMR (and  $^{13}\text{C}$  NMR or  $^{19}\text{F}$ -NMR) were provided for known compounds to show excellent agreement with reported data.

### 4.1 Procedure for synthesis **3e**<sup>1-2</sup>

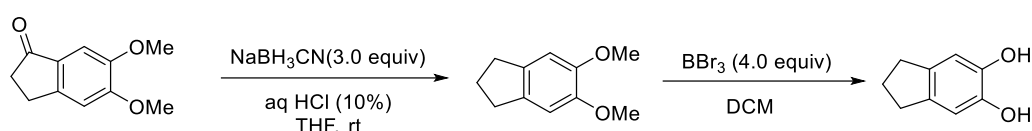

**5,6-Dimethoxy-2,3-dihydro-1H-indene:** To a solution of commercially available 5,6-dimethoxy-2,3-dihydro-1H-inden-1-one (1.92 g, 10.0 mmol, 1.0 equiv) in THF (20 mL) at room temperature was added  $\text{NaBH}_3\text{CN}$  (1.86 g, 30.0 mmol, 3.0 equiv). 10% aq HCl (20 mL) was then slowly added to the mixture. After stirring for 5 h, the resulting mixture was extracted with EtOAc. The combined organic layers were washed with brine, dried over  $\text{Na}_2\text{SO}_4$ , filtered, and concentrated. Flash column chromatography with (PE/EtOAc = 50:1) afforded (1.7 g, 96%) of 5,6-dimethoxy-2,3-dihydro-1H-indene as a white solid. The procedure and spectroscopic data were according to the literature report.

To a solution of 5,6-Dimethoxy-2,3-dihydro-1H-indene (1.78 mg, 10 mmol) in  $\text{CH}_2\text{Cl}_2$  (60 mL) was added  $\text{BBr}_3$  (40 mmol, 4 equiv.) at 0 °C, and the mixture was allowed to stir at room temperature for 2 h. Water was added dropwise to quench the reaction, and the mixture was extracted with  $\text{CH}_2\text{Cl}_2$ . The organic phase was dried by  $\text{Na}_2\text{SO}_4$  and evaporated under vacuum. The residue was purified by column chromatography (PE/EtOAc = 4:1) to yield 2,3-dihydro-1H-indene-5,6-diol (**3e**) as a white solid (1.2 g, 80%). The procedure and spectroscopic data were according to the literature report.

### 4.2 Procedure for synthesis resorcinol derivatives **3n**<sup>3-4</sup>

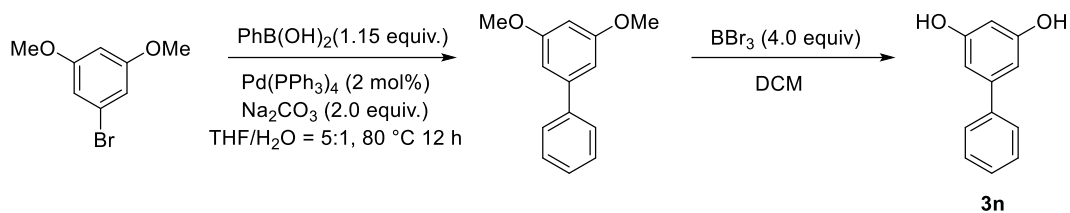

A suspension of 1-bromo-3,5-dimethoxybenzene (2.17 g, 10 mmol), phenylboronic acid (1.4 g, 11.5 mmol),  $\text{Pd(PPh}_3)_4$  (0.231 g, 0.2 mmol) and  $\text{Na}_2\text{CO}_3$  (2.12 g, 20 mmol) in THF/water (5/1, 60 mL) was stirred for 12 h under reflux condition. After cooling, the reaction mixture was filtrated through Celite, quenched with sat.  $\text{NH}_4\text{Cl}$  aq., and extracted with ethyl acetate. The combined organic layers were dried over anhydrous  $\text{Na}_2\text{SO}_4$ , filtered, and evaporated under a vacuum. The crude product was purified by silica column chromatography (PE/EtOAc = 50:1) to afford 3,5-dimethoxy-1,1'-biphenyl in 70% yield (1.49 g).  $\text{BBr}_3$  (1.0 M in  $\text{CH}_2\text{Cl}_2$ , 40 mL, 40 mmol) was added to a solution of 3,5-dimethoxy-1,1'-biphenyl (2.14 g, 10 mmol) in  $\text{CH}_2\text{Cl}_2$  (40 mL) at 0 °C. The mixture was stirred for 12 h at room temperature. After cooling to 0 °C, the reaction was quenched with sat.  $\text{NaHCO}_3$  aq. The aqueous layer was extracted with  $\text{CH}_2\text{Cl}_2$ . The combined organic layers were dried over anhydrous  $\text{Na}_2\text{SO}_4$ , filtered, and evaporated under a vacuum. The crude product was purified by silica column chromatography (PE/EtOAc = 2:1) to afford **3n** in 90% yield (1.67 g, white solid). The procedure and spectroscopic data were according to the literature report.

Compounds **3o**, **3p**, **3q**, and **3r** were prepared following the procedure for **3n**.

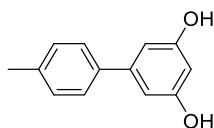

**3,5-Dihydroxy-4'-methyl-1,1'-biphenyl (3o)**<sup>4</sup> (1.06 g, 53% yield), (2 steps from 1-bromo-3,5-dimethoxybenzene). White solid after isolation by silica-gel column chromatography (PE/EtOAc = 2:1). The spectroscopic data were according to the literature report.

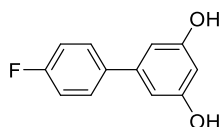

**4'-Fluoro-[1,1'-biphenyl]-3,5-diol (3p)**<sup>5</sup> (898 mg, 44% yield), (2 steps from 1-bromo-3,5-dimethoxybenzene). White solid after isolation by silica-gel column chromatography (PE/EtOAc = 1:1). The spectroscopic data were according to the literature report.

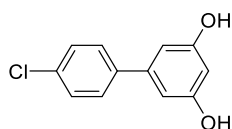

**4'-Chloro-[1,1'-biphenyl]-3,5-diol (3q)**<sup>6</sup> (1.01 g, 46% yield), (2 steps from 1-bromo-3,5-dimethoxybenzene). White solid after isolation by silica-gel column chromatography (PE/EtOAc = 1:1). The spectroscopic data were according to the literature report.

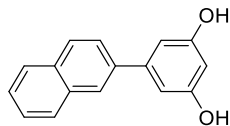

**5-(Naphthalen-2-yl)benzene-1,3-diol (3r)**<sup>3</sup> (898 mg, 38% yield), (2 steps from 1-bromo-3,5-dimethoxybenzene). White solid after isolation by silica-gel column chromatography (PE/EtOAc = 1:1). The spectroscopic data were according to the literature report.



## 5 General procedure for the Alkylation and Characterization of Alkylation Products.

$^1\text{H}$  NMR,  $^{13}\text{C}$  NMR,  $^{19}\text{F}$  NMR and HRMS were provided for all compounds not previously reported, for cases where HRMS were not obtained after several tries, GC-MS were provided. Only  $^1\text{H}$  NMR (and  $^{13}\text{C}$  NMR or  $^{19}\text{F}$  NMR) were provided for known compounds to show excellent agreement with reported data.

**General procedure A:** To a 10 mL Schlenk tube was charged with **Cat.1** (10 mol%),  $\text{Zn}(\text{OTf})_2$  (10 mol%), **1** or **3** (1.0 equiv.) and an oven-dried stirring bar. The Schlenk tube was subjected to three cycles of pressurization–depressurization using dry argon. After that, under the protection of an argon atmosphere, HFIP (0.4 M) and MeOH (2.0 equiv.) were added and the reaction mixture was stirred at 150 °C for 24 h. The reaction was then quenched by adding  $\text{K}_2\text{CO}_3$  (20 mol%), filtration, and then washing the solid with DCM, the combined organic phase was concentrated under reduced pressure and the residue was purified using flash column chromatography on silica gel to give the products.

**General procedure B:** In a nitrogen-filled glove box, to a 10 mL Schlenk tube was charged with **Cat.1** (10 mol%),  $\text{Zn}(\text{OTf})_2$  (10 mol%), **1** or **3** (1.0 equiv.), Hexane (0.4 M), MeOH (5.0 equiv.) and an oven-dried stirring bar. The tube was sealed and removed from the glove box. After degassing, the reaction mixture was stirred at 150 °C for 24 h. The reaction was then quenched by adding  $\text{K}_2\text{CO}_3$  (20 mol%), filtration and then washing the solid with DCM, the combined organic phase was concentrated under reduced pressure, and the residue was purified using flash column chromatography on silica gel to give the products.

**General procedure C:** To a 10 mL Schlenk tube was charged with **Cat.1** (10 mol%),  $\text{Zn}(\text{OTf})_2$  (10 mol%), **1** (5 equiv), HFIP (0.4 M), MeOH (8  $\mu\text{L}$ , 1.0 equiv.) and an oven-dried stirring bar under air. The reaction mixture was stirred at 150 °C for 48 h. The reaction was then quenched by adding  $\text{K}_2\text{CO}_3$  (20 mol%), and dodecane or  $\text{CH}_2\text{Br}_2$  as

an internal standard was added, take sample 1-2 drops to check yield by GC or  $^1\text{H}$  NMR.

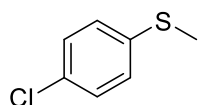

**2a:** (4-chlorophenyl)(methyl)sulfane.<sup>7</sup>

**2a** was synthesized according to the **General procedure A** With **1a** (0.2 mmol, 29 mg), **Cat.1** (5.5 mg, 10 mol%),  $\text{Zn}(\text{OTf})_2$  (7.2 mg, 10 mol%), MeOH (16  $\mu\text{L}$ , 2.0 equiv.) and HFIP (0.5 mL, 0.4 M). The reaction was stirred at 150 °C for 24 h then quenched by adding  $\text{K}_2\text{CO}_3$  (20 mol%), filtration, and then washing the solid with DCM, the combined organic phase was concentrated under reduced pressure, and the residue was purified using flash column chromatography (100% petroleum ether) on silica gel to give the desired products **2a** (28.5 mg, 90%) as a colorless oil  $^1\text{H}$  NMR (400 MHz,  $\text{CDCl}_3$ )  $\delta$  7.29 – 7.26 (m, 2H), 7.22 – 7.18 (m, 2H), 2.49 (s, 3H).  $^{13}\text{C}$  NMR (101 MHz,  $\text{CDCl}_3$ )  $\delta$  137.1, 131.0, 129.0, 128.1, 16.2. The spectroscopic data were according to the literature report.

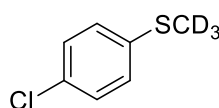

**2a-d<sub>3</sub>:** (4-chlorophenyl)(methyl- $d_3$ )sulfane<sup>8</sup>.

**2a-d<sub>3</sub>** was synthesized according to the **General procedure A** With **1a** (0.2 mmol, 29 mg), **Cat.1** (5.5 mg, 10 mol%),  $\text{Zn}(\text{OTf})_2$  (7.2 mg, 10 mol%),  $\text{CD}_3\text{OH}$  (16  $\mu\text{L}$ , 2.0 equiv.) and HFIP (0.5 mL, 0.4 M). The reaction was stirred at 150 °C for 24 h then quenched by adding  $\text{K}_2\text{CO}_3$  (20 mol%), filtration and then washing the solid with DCM, the combined organic phase was concentrated under reduced pressure and the residue was purified using flash column chromatography (100% petroleum ether) on silica gel to give the desired products **2a-d<sub>3</sub>** (31 mg, 97%) as a colorless oil.  $^1\text{H}$  NMR (400 MHz,  $\text{CDCl}_3$ )  $\delta$  7.28 – 7.26 (m, 2H), 7.21 – 7.19 (m, 2H).  $^{13}\text{C}$  NMR (101 MHz,  $\text{CDCl}_3$ )  $\delta$  137.1, 131.0, 129.0, 128.0. The spectroscopic data were according to the literature report.

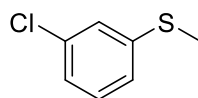

**2b:** (3-chlorophenyl)(methyl)sulfane<sup>7</sup>.

**2b** was synthesized according to the **General procedure A** With **1b** (0.2 mmol, 29 mg), **Cat.1** (5.5 mg, 10 mol%),  $\text{Zn}(\text{OTf})_2$  (7.2 mg, 10 mol%), MeOH (16  $\mu\text{L}$ , 2.0 equiv.) and HFIP (0.5 mL, 0.4 M). The reaction was stirred at 150 °C for 24 h

then quenched by adding  $K_2CO_3$  (20 mol%), filtration and then washing the solid with DCM, the combined organic phase was concentrated under reduced pressure and the residue was purified using flash column chromatography (100% petroleum ether) on silica gel to give the desired products **2b** (30.5 mg, 96%) as a colorless oil.  $^1H$  NMR (600 MHz,  $CDCl_3$ ) 7.34 (dt,  $J$  = 8.1, 1.4 Hz, 1H), 7.24 (d,  $J$  = 7.7 Hz, 1H), 7.17 (d,  $J$  = 7.9 Hz, 1H), 7.08 (t,  $J$  = 7.6 Hz, 1H), 2.48 (s, 3H).  $^{13}C$  NMR (101 MHz,  $CDCl_3$ )  $\delta$  137.8, 132.0, 129.5, 127.3, 125.7, 125.6, 15.3. The spectroscopic data were according to the literature report.

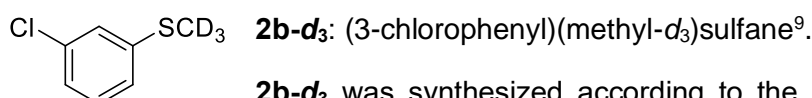

**2b-d<sub>3</sub>** was synthesized according to the **General procedure A** With **1b** (0.2 mmol, 29 mg), **Cat.1** (5.5 mg, 10 mol%),  $Zn(OTf)_2$  (7.2 mg, 10 mol%),  $CD_3OH$  (16  $\mu$ L, 2.0 equiv.) and HFIP (0.5 mL, 0.4 M). The reaction was stirred at 150 °C for 24 h then quenched by adding  $K_2CO_3$  (20 mol%), filtration and then washing the solid with DCM, the combined organic phase was concentrated under reduced pressure and the residue was purified using flash column chromatography (100% petroleum ether) on silica gel to give the desired products **2b-d<sub>3</sub>** (30.1 mg, 94%) as a colorless oil.  $^1H$  NMR (400 MHz,  $CDCl_3$ )  $\delta$  7.34 (dd,  $J$  = 7.9, 1.2 Hz, 1H), 7.27 – 7.23 (m, 1H), 7.15 (dd,  $J$  = 7.9, 1.5 Hz, 1H), 7.08 (td,  $J$  = 7.8, 1.5 Hz, 1H).  $^{13}C$  NMR (101 MHz,  $CDCl_3$ )  $\delta$  137.8, 132.0, 129.5, 127.3, 125.7, 125.6. The spectroscopic data were according to the literature report.

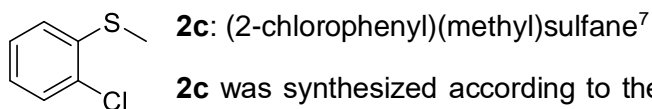

**2c** was synthesized according to the **General procedure A** With **1c** (0.2 mmol, 29 mg), **Cat.1** (5.5 mg, 10 mol%),  $Zn(OTf)_2$  (7.2 mg, 10 mol%), MeOH (16  $\mu$ L, 2.0 equiv.) and HFIP (0.5 mL, 0.4 M). The reaction was stirred at 150 °C for 24 h then quenched by adding  $K_2CO_3$  (20 mol%), filtration and then washing the solid with DCM, the combined organic phase was concentrated under reduced pressure and the residue was purified using flash column chromatography (100% petroleum ether) on silica gel to give the desired products **2c** (29.8 mg, 93%) as a colorless oil.  $^1H$  NMR

(600 MHz, CDCl<sub>3</sub>)  $\delta$  7.21 – 7.18 (m, 2H), 7.13 – 7.09 (m, 2H), 2.48 (s, 3H). <sup>13</sup>C NMR (101 MHz, CDCl<sub>3</sub>)  $\delta$  140.8, 134.9, 129.9, 126.0, 125.2, 124.6, 15.7. The spectroscopic data were according to the literature report.

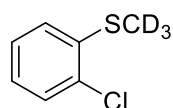

**2c-d<sub>3</sub>**: (2-chlorophenyl)(methyl-d<sub>3</sub>)sulfane<sup>9</sup>.

**2c-d<sub>3</sub>** was synthesized according to the **General procedure A** With **1c** (0.2 mmol, 29 mg), **Cat.1** (5.5 mg, 10 mol%), Zn(OTf)<sub>2</sub> (7.2 mg, 10 mol%), CD<sub>3</sub>OH (16  $\mu$ L, 2.0 equiv.) and HFIP (0.5 mL, 0.4 M). The reaction was stirred at 150 °C for 24 h then quenched by adding K<sub>2</sub>CO<sub>3</sub> (20 mol%), filtration and then washing the solid with DCM, the combined organic phase was concentrated under reduced pressure and the residue was purified using flash column chromatography (100% petroleum ether) on silica gel to give the desired products **2c-d<sub>3</sub>** (29.1 mg, 91%) as a colorless oil. <sup>1</sup>H NMR (400 MHz, CDCl<sub>3</sub>)  $\delta$  7.22 – 7.18 (m, 1H), 7.12 – 7.08 (m, 1H). <sup>13</sup>C NMR (101 MHz, CDCl<sub>3</sub>)  $\delta$  140.8, 134.9, 129.9, 126.0, 125.1, 124.6. The spectroscopic data were according to the literature report.

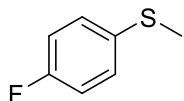

**2d**: (4-fluorophenyl)(methyl)sulfane<sup>10</sup>

**2d** was synthesized according to the **General procedure A** With **1d** (0.2 mmol, 26 mg), **Cat.1** (5.5 mg, 10 mol%), Zn(OTf)<sub>2</sub> (7.2 mg, 10 mol%), MeOH (16  $\mu$ L, 2.0 equiv.) and HFIP (0.5 mL, 0.4 M). The reaction was stirred at 150 °C for 24 h then quenched by adding K<sub>2</sub>CO<sub>3</sub> (20 mol%), filtration and then washing the solid with DCM, the combined organic phase was concentrated under reduced pressure and the residue was purified using flash column chromatography (100% petroleum ether) on silica gel to give the desired products **2d** (25.6 mg, 90%) as a colorless oil. <sup>1</sup>H NMR (600 MHz, CDCl<sub>3</sub>)  $\delta$  7.25 – 7.24 (m, 2H), 7.01 – 6.98 (m, 1H), 2.47 (s, 3H). <sup>13</sup>C NMR (101 MHz, CDCl<sub>3</sub>)  $\delta$  162.5 (d, *J* = 245 Hz), 133.5 (d, *J* = 3 Hz), 129.5 (d, *J* = 7 Hz), 116.1 (d, *J* = 22 Hz), 17.3. <sup>19</sup>F NMR (565 MHz, CDCl<sub>3</sub>)  $\delta$  -117.3 The spectroscopic data were according to the literature report.

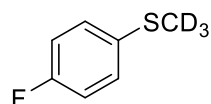

**2d-d<sub>3</sub>**: (4-fluorophenyl)(methyl-d<sub>3</sub>)sulfane

**2d-d<sub>3</sub>** was synthesized according to the **General procedure A** With **1d** (0.2 mmol, 26 mg), **Cat.1** (5.5 mg, 10 mol%), Zn(OTf)<sub>2</sub> (7.2 mg, 10 mol%), CD<sub>3</sub>OD (16 μL, 2.0 equiv.) and HFIP (0.5 mL, 0.4 M). The reaction was stirred at 150 °C for 24 h then quenched by adding K<sub>2</sub>CO<sub>3</sub> (20 mol%), filtration and then washing the solid with DCM, the combined organic phase was concentrated under reduced pressure and the residue was purified using flash column chromatography (100% petroleum ether) on silica gel to give the desired products **2d-d<sub>3</sub>** (26.8 mg, 91%) as a colorless oil. **<sup>1</sup>H NMR** (600 MHz, CDCl<sub>3</sub>) δ 7.29 – 7.27 (m, 2H), 7.04 – 7.01 (m, 2H). **<sup>13</sup>C NMR** (101 MHz, CDCl<sub>3</sub>) δ 162.5 (d, *J* = 245 Hz), 133.4 (d, *J* = 2 Hz), 129.5 (d, *J* = 7 Hz), 116.2 (d, *J* = 22 Hz). **<sup>19</sup>F NMR** (565 MHz, CDCl<sub>3</sub>) δ -117.4. **HRMS** *m/z* (ESI): calcd. for C<sub>7</sub>H<sub>4</sub>D<sub>3</sub>FS [M+H]<sup>+</sup>: 146.0514, found: 146.0512.

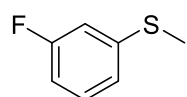

**2e**: (3-fluorophenyl)(methyl)sulfane<sup>11</sup>

**2e** was synthesized according to the **General procedure A** With **1e** (0.2 mmol, 26 mg), **Cat.1** (5.5 mg, 10 mol%), Zn(OTf)<sub>2</sub> (7.2 mg, 10 mol%), MeOH (16 μL, 2.0 equiv.) and HFIP (0.5 mL, 0.4 M). The reaction was stirred at 150 °C for 24 h then quenched by adding K<sub>2</sub>CO<sub>3</sub> (20 mol%), filtration and then washing the solid with DCM, the combined organic phase was concentrated under reduced pressure and the residue was purified using flash column chromatography (100% petroleum ether) on silica gel to give the desired products **2e** (21.6 mg, 76%) as a colorless oil. **<sup>1</sup>H NMR** (600 MHz, CDCl<sub>3</sub>) δ 7.24 – 7.21 (m, 1H), 7.02 (d, *J* = 7.8 Hz, 1H), 6.9 (d, *J* = 9.7 Hz, 1H), 6.8 (t, *J* = 8.3 Hz, 1H), 2.48 (s, 3H). **<sup>13</sup>C NMR** (101 MHz, CDCl<sub>3</sub>) δ 164.4 (d, *J* = 247 Hz), 141.21 (d, *J* = 7 Hz), 130.2 (d, *J* = 9 Hz), 121.9 (d, *J* = 3 Hz), 113.2 (d, *J* = 24 Hz), 111.9 (d, *J* = 21 Hz), 15.5. **<sup>19</sup>F NMR** (565 MHz, CDCl<sub>3</sub>) δ -112.6. The spectroscopic data were according to the literature report.

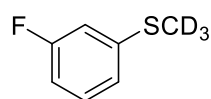

**2e-d<sub>3</sub>**: (3-fluorophenyl)(methyl-d<sub>3</sub>)sulfane

**2e-d<sub>3</sub>** was synthesized according to the **General procedure A** With **1e** (0.2 mmol, 26 mg), **Cat.1** (5.5 mg, 10 mol%), Zn(OTf)<sub>2</sub> (7.2 mg, 10 mol%), CD<sub>3</sub>OD

(16  $\mu$ L, 2.0 equiv.) and HFIP (0.5 mL, 0.4 M). The reaction was stirred at 150 °C for 24 h then quenched by adding  $K_2CO_3$  (20 mol%), filtration and then washing the solid with DCM, the combined organic phase was concentrated under reduced pressure and the residue was purified using flash column chromatography (100% petroleum ether) on silica gel to give the desired products **2e-d<sub>3</sub>** (24.4 mg, 83%) as a colorless oil. **<sup>1</sup>H NMR** (400 MHz,  $CDCl_3$ )  $\delta$  7.26 – 7.23 (m, 1H), 7.04 – 7.02 (m, 1H), 6.98 – 6.94 (m, 1H), 6.86 – 6.81 (m, 1H). **<sup>13</sup>C NMR** (101 MHz,  $CDCl_3$ )  $\delta$  164.4 (d,  $J$  = 166 Hz), 141.2 (d,  $J$  = 5 Hz), 130.2 (d,  $J$  = 6 Hz), 122.0 (d,  $J$  = 2 Hz), 113.2 (d,  $J$  = 16 Hz), 112.0 (d,  $J$  = 14 Hz). **<sup>19</sup>F NMR** (565 MHz,  $CDCl_3$ )  $\delta$  -112.6. **HRMS**  $m/z$  (ESI): calcd. for  $C_7H_4D_3FS$   $[M+H]^+$ : 146.0514, found: 146.0510.

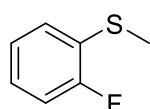

**2f**: (2-fluorophenyl)(methyl)sulfane<sup>11</sup>

**2f** was synthesized according to the **General procedure A** With **1f** (0.2 mmol, 26 mg), **Cat.1** (5.5 mg, 10 mol%),  $Zn(OTf)_2$  (7.2 mg, 10 mol%), MeOH (16  $\mu$ L, 2.0 equiv.) and HFIP (0.5 mL, 0.4 M). The reaction was stirred at 150 °C for 24 h then quenched by adding  $K_2CO_3$  (20 mol%), filtration and then washing the solid with DCM, the combined organic phase was concentrated under reduced pressure and the residue was purified using flash column chromatography (100% petroleum ether) on silica gel to give the desired products **2f** (25.3 mg, 89%). as a colorless oil. **<sup>1</sup>H NMR** (400 MHz,  $CDCl_3$ )  $\delta$  7.29 – 7.25 (m, 1H), 7.19 – 7.01 (m, 3H), 2.47 (s, 3H). **<sup>13</sup>C NMR** (101 MHz,  $CDCl_3$ )  $\delta$  161.7 (d,  $J$  = 250 Hz), 128.7 (d,  $J$  = 3 Hz), 127.0 (d,  $J$  = 7 Hz), 125.6 (d,  $J$  = 17 Hz), 124.6 (d,  $J$  = 3 Hz), 115.4 (d,  $J$  = 21 Hz), 15.6. **<sup>19</sup>F NMR** (565 MHz,  $CDCl_3$ )  $\delta$  -111.4. The spectroscopic data were according to the literature report.

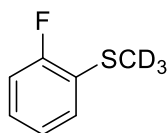

**2f-d<sub>3</sub>**: (2-fluorophenyl)(methyl- $d_3$ )sulfane

**2f-d<sub>3</sub>** was synthesized according to the **General procedure A** With **1f** (0.2 mmol, 26 mg), **Cat.1** (5.5 mg, 10 mol%),  $Zn(OTf)_2$  (7.2 mg, 10 mol%),  $CD_3OD$  (16  $\mu$ L, 2.0 equiv.) and HFIP (0.5 mL, 0.4 M). The reaction was stirred at 150 °C for 24 h then quenched by adding  $K_2CO_3$  (20 mol%), filtration and then washing the solid with DCM, the combined organic phase was concentrated under

reduced pressure and the residue was purified using flash column chromatography (100% petroleum ether) on silica gel to give the desired products **2f-d<sub>3</sub>** (21.2 mg, 72%). as a colorless oil. **<sup>1</sup>H NMR** (400 MHz, CDCl<sub>3</sub>) δ 7.29 – 7.25 (m, 1H), 7.19 – 7.01 (m, 3H). **<sup>13</sup>C NMR** (101 MHz, CDCl<sub>3</sub>) δ 161.4 (d, *J* = 163 Hz), 128.9(d, *J* = 2 Hz), 127.1(d, *J* = 5 Hz), 125.6(d, *J* = 11 Hz), 124.6 (d, *J* = 2 Hz), 115.5(d, *J* = 14 Hz). **<sup>19</sup>F NMR** (565 MHz, CDCl<sub>3</sub>) δ -111.4. **HRMS** *m/z* (ESI): calcd. for C<sub>7</sub>H<sub>4</sub>D<sub>3</sub>FS [M+H]<sup>+</sup>: 146.0514, found: 146.0514.

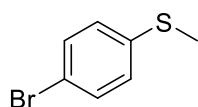

**2g**: (4-bromophenyl)(methyl)sulfane<sup>11</sup>

**2g** was synthesized according to the **General procedure A** With **1g** (0.2 mmol, 38 mg), **Cat.1** (5.5 mg, 10 mol%), Zn(OTf)<sub>2</sub> (7.2 mg, 10 mol%), MeOH (16 μL, 2.0 equiv.) and HFIP (0.5 mL, 0.4 M). The reaction was stirred at 150 °C for 24 h then quenched by adding K<sub>2</sub>CO<sub>3</sub> (20 mol%), filtration and then washing the solid with DCM, the combined organic phase was concentrated under reduced pressure and the residue was purified using flash column chromatography (100% petroleum ether) on silica gel to give the desired products **2g** (34.5 mg, 85%) as a colorless oil. **<sup>1</sup>H NMR** (600 MHz, CDCl<sub>3</sub>) δ 7.39 (d, *J* = 8.4 Hz, 2H), 7.11 (d, *J* = 8.4 Hz, 2H), 2.46 (s, 3H). **<sup>13</sup>C NMR** (101 MHz, CDCl<sub>3</sub>) δ 137.9, 131.9, 128.3, 118.8, 16.1. The spectroscopic data were according to the literature report.

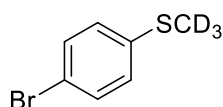

**2g-d<sub>3</sub>**: (4-bromophenyl)(methyl-d<sub>3</sub>)sulfane<sup>9</sup>

**2g-d<sub>3</sub>** was synthesized according to the **General procedure A** With **1g** (0.2 mmol, 38 mg), **Cat.1** (5.5 mg, 10 mol%), Zn(OTf)<sub>2</sub> (7.2 mg, 10 mol%), CD<sub>3</sub>OD (16 μL, 2.0 equiv.) and HFIP (0.5 mL, 0.4 M). The reaction was stirred at 150 °C for 24 h then quenched by adding K<sub>2</sub>CO<sub>3</sub> (20 mol%), filtration and then washing the solid with DCM, the combined organic phase was concentrated under reduced pressure and the residue was purified using flash column chromatography (100% petroleum ether) on silica gel to give the desired products **2g-d<sub>3</sub>** (32.8 mg, 80%) as a colorless oil. **<sup>1</sup>H NMR** (400 MHz, CDCl<sub>3</sub>) δ 7.38 (d, *J* = 8.5 Hz, 2H), 7.13 (d, *J* = 8.6 Hz, 2H). **<sup>13</sup>C NMR** (101 MHz, CDCl<sub>3</sub>) δ 137.8, 131.9, 128.3, 118.7. The spectroscopic data were

according to the literature report.

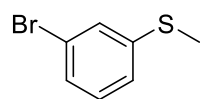

**2h:** (3-bromophenyl)(methyl)sulfane<sup>11</sup>

**2h** was synthesized according to the **General procedure A** With **1h** (0.2 mmol, 38 mg), **Cat.1** (5.5 mg, 10 mol%), Zn(OTf)<sub>2</sub> (7.2 mg, 10 mol%), MeOH (16  $\mu$ L, 2.0 equiv.) and HFIP (0.5 mL, 0.4 M). The reaction was stirred at 150 °C for 24 h then quenched by adding K<sub>2</sub>CO<sub>3</sub> (20 mol%), filtration and then washing the solid with DCM, the combined organic phase was concentrated under reduced pressure and the residue was purified using flash column chromatography (100% petroleum ether) on silica gel to give the desired products **2h** (37.8 mg, 93%) as a colorless oil. **<sup>1</sup>H NMR** (600 MHz, CDCl<sub>3</sub>)  $\delta$  7.36 (s, 1H), 7.27 – 7.24 (m, 1H), 7.18 – 7.13 (m, 2H), 2.48 (s, 3H). **<sup>13</sup>C NMR** (101 MHz, CDCl<sub>3</sub>)  $\delta$  141.2, 130.2, 128.9, 128.1, 125.2, 123.1, 15.8. The spectroscopic data were according to the literature report.

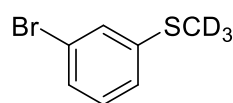

**2h-d<sub>3</sub>:** (3-bromophenyl)(methyl-d<sub>3</sub>)sulfane

**2h-d<sub>3</sub>** was synthesized according to the **General procedure A** With **1h** (0.2 mmol, 38 mg), **Cat.1** (5.5 mg, 10 mol%), Zn(OTf)<sub>2</sub> (7.2 mg, 10 mol%), CD<sub>3</sub>OD (16  $\mu$ L, 2.0 equiv.) and HFIP (0.5 mL, 0.4 M). The reaction was stirred at 150 °C for 24 h then quenched by adding K<sub>2</sub>CO<sub>3</sub> (20 mol%), filtration and then washing the solid with DCM, the combined organic phase was concentrated under reduced pressure and the residue was purified using flash column chromatography (100% petroleum ether) on silica gel to give the desired products **2h-d<sub>3</sub>** (34 mg, 83%) as a colorless oil. **<sup>1</sup>H NMR** (600 MHz, CDCl<sub>3</sub>)  $\delta$  7.36 – 7.35 (m, 1H), 7.25 – 7.24 (m, 1H), 7.18 – 7.11 (m, 2H), **<sup>13</sup>C NMR** (101 MHz, CDCl<sub>3</sub>)  $\delta$  141.1, 130.2, 128.8, 128.0, 125.1, 123.0. **HRMS** m/z (ESI): calcd. for C<sub>7</sub>H<sub>4</sub>D<sub>3</sub>BrS [M+H]<sup>+</sup>: 205.9713, found: 205.9710

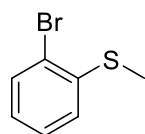

**2i:** (2-bromophenyl)(methyl)sulfane<sup>12</sup>

**2i** was synthesized according to the **General procedure A** With **1i** (0.2 mmol, 38 mg), **Cat.1** (5.5 mg, 10 mol%), Zn(OTf)<sub>2</sub> (7.2 mg, 10 mol%), MeOH (16  $\mu$ L, 2.0 equiv.) and HFIP (0.5 mL, 0.4 M). The reaction was stirred at 150 °C



for 24 h then quenched by adding  $K_2CO_3$  (20 mol%), filtration and then washing the solid with DCM, the combined organic phase was concentrated under reduced pressure and the residue was purified using flash column chromatography (100% petroleum ether) on silica gel to give the desired products **2i** (36.5 mg, 90%) as a colorless oil.  $^1H$  NMR (600 MHz,  $CDCl_3$ )  $\delta$  7.53 (d,  $J$  = 7.9 Hz, 1H), 7.30 (t,  $J$  = 7.6 Hz, 1H), 7.14 (d,  $J$  = 7.9 Hz, 1H), 7.02 (t,  $J$  = 7.6 Hz, 1H), 2.48 (s, 3H).  $^{13}C$  NMR (101 MHz,  $CDCl_3$ )  $\delta$  139.8, 132.8, 127.9, 125.8, 125.5, 121.9, 15.9. The spectroscopic data were according to the literature report.

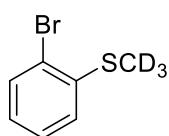

**2i-d<sub>3</sub>**: (2-bromophenyl)(methyl-d<sub>3</sub>)sulfane<sup>13</sup>

**2i-d<sub>3</sub>** was synthesized according to the **General procedure A** With **1i** (0.2 mmol, 38 mg), **Cat.1** (5.5 mg, 10 mol%),  $Zn(OTf)_2$  (7.2 mg, 10 mol%),  $CD_3OD$  (16  $\mu$ L, 2.0 equiv.) and HFIP (0.5 mL, 0.4 M). The reaction was stirred at 150 °C for 24 h then quenched by adding  $K_2CO_3$  (20 mol%), filtration and then washing the solid with DCM, the combined organic phase was concentrated under reduced pressure and the residue was purified using flash column chromatography (100% petroleum ether) on silica gel to give the desired products **2i-d<sub>3</sub>** (40 mg, 98%) as a colorless oil.  $^1H$  NMR (400 MHz,  $CDCl_3$ )  $\delta$  7.51 (dd,  $J$  = 7.9, 1.2 Hz, 1H), 7.30 (td,  $J$  = 7.9, 1.2 Hz, 1H), 7.12 (dd,  $J$  = 7.9, 1.4 Hz, 1H), 7.01 (td,  $J$  = 7.8, 1.4 Hz, 1H).  $^{13}C$  NMR (101 MHz,  $CDCl_3$ )  $\delta$  139.8, 132.8, 127.9, 125.8, 125.6, 122.0. The spectroscopic data were according to the literature report.

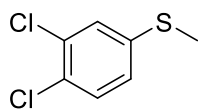

**2j**: (3,4-dichlorophenyl)(methyl)sulfane<sup>14</sup>

**2j** was synthesized according to the **General procedure A** With **1j** (0.2 mmol, 36 mg), **Cat.1** (5.5 mg, 10 mol%),  $Zn(OTf)_2$  (7.2 mg, 10 mol%), MeOH (16  $\mu$ L, 2.0 equiv.) and HFIP (0.5 mL, 0.4 M). The reaction was stirred at 150 °C for 24 h then quenched by adding  $K_2CO_3$  (20 mol%), filtration and then washing the solid with DCM, the combined organic phase was concentrated under reduced pressure and the residue was purified using flash column chromatography (PE/EtOAc = 50:1) on silica gel to give the desired products **2j** (38 mg, 98%) as a white solid.  $^1H$  NMR (600 MHz,

CDCl<sub>3</sub>)  $\delta$  7.33 – 7.29 (m, 2H), 7.06 (d,  $J$  = 8.4 Hz, 1H), 2.47 (s, 3H). <sup>13</sup>C NMR (101 MHz, CDCl<sub>3</sub>)  $\delta$  139.1, 133.0, 130.5, 129.0, 127.8, 125.9, 16.0. The spectroscopic data were according to the literature report.

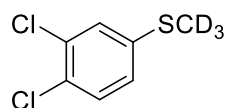

**2j-d<sub>3</sub>**: (3,4-dichlorophenyl)(methyl-d<sub>3</sub>)sulfane

**2j-d<sub>3</sub>** was synthesized according to the **General procedure A** With **1j** (0.2 mmol, 36 mg), **Cat.1** (5.5 mg, 10 mol%), Zn(OTf)<sub>2</sub> (7.2 mg, 10 mol%), CD<sub>3</sub>OD (16  $\mu$ L, 2.0 equiv.) and HFIP (0.5 mL, 0.4 M). The reaction was stirred at 150 °C for 24 h then quenched by adding K<sub>2</sub>CO<sub>3</sub> (20 mol%), filtration and then washing the solid with DCM, the combined organic phase was concentrated under reduced pressure and the residue was purified using flash column chromatography (PE/EtOAc = 50:1) on silica gel to give the desired products **2j-d<sub>3</sub>** (36.1 mg, 92%) as a white solid. <sup>1</sup>H NMR (400 MHz, CDCl<sub>3</sub>)  $\delta$  7.34 – 7.29 (m, 2H), 7.05 (dd,  $J$  = 8.5, 2.2 Hz, 1H). <sup>13</sup>C NMR (101 MHz, CDCl<sub>3</sub>)  $\delta$  139.0, 133.1, 130.5, 129.0, 127.8, 125.9. **HRMS** m/z (ESI): calcd. for C<sub>7</sub>H<sub>3</sub>D<sub>3</sub>Cl<sub>2</sub>S [M+H]<sup>+</sup>: 195.9828, found: 195.9820.

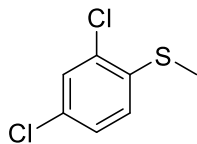

**2k**: (2,4-dichlorophenyl)(methyl)sulfane

**2k** was synthesized according to the **General procedure A** With **1k** (0.2 mmol, 36 mg), **Cat.1** (5.5 mg, 10 mol%), Zn(OTf)<sub>2</sub> (7.2 mg, 10 mol%), MeOH (16  $\mu$ L, 2.0 equiv.) and HFIP (0.5 mL, 0.4 M). The reaction was stirred at 150 °C for 24 h then quenched by adding K<sub>2</sub>CO<sub>3</sub> (20 mol%), filtration and then washing the solid with DCM, the combined organic phase was concentrated under reduced pressure and the residue was purified using flash column chromatography (PE/EtOAc = 50:1) on silica gel to give the desired products **2k** (33.5 mg, 87%) as a white solid. <sup>1</sup>H NMR (600 MHz, CDCl<sub>3</sub>)  $\delta$  7.35 (s, 1H), 7.23 (d,  $J$  = 8.5 Hz, 1H), 7.09 (d,  $J$  = 8.4 Hz, 1H), 2.47 (s, 3H). <sup>13</sup>C NMR (101 MHz, CDCl<sub>3</sub>)  $\delta$  136.6, 132.6, 130.8, 129.3, 127.5, 126.6, 15.5. **HRMS** m/z (ESI): calcd. for C<sub>7</sub>H<sub>6</sub>Cl<sub>2</sub>S [M+H]<sup>+</sup>: 192.9640, found: 192.9644.

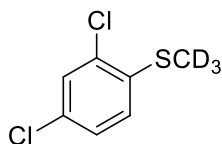

**2k-d<sub>3</sub>**: (2,4-dichlorophenyl)(methyl-d<sub>3</sub>)sulfane

**2k-d<sub>3</sub>** was synthesized according to the **General procedure A** With **1k** (0.2 mmol, 36 mg), **Cat.1** (5.5 mg, 10 mol%), Zn(OTf)<sub>2</sub> (7.2 mg, 10 mol%), CD<sub>3</sub>OD (16 μL, 2.0 equiv.) and HFIP (0.5 mL, 0.4 M). The reaction was stirred at 150 °C for 24 h then quenched by adding K<sub>2</sub>CO<sub>3</sub> (20 mol%), filtration and then washing the solid with DCM, the combined organic phase was concentrated under reduced pressure and the residue was purified using flash column chromatography (PE/EtOAc = 50:1) on silica gel to give the desired products **2k-d<sub>3</sub>** (38.4 mg, 98%) as a white solid. **<sup>1</sup>H NMR** (400 MHz, CDCl<sub>3</sub>) δ 7.37 (d, *J* = 2.2 Hz, 1H), 7.22 (dd, *J* = 8.5, 2.2 Hz, 1H), 7.08 (d, *J* = 8.5 Hz, 1H). **<sup>13</sup>C NMR** (101 MHz, CDCl<sub>3</sub>) δ 136.6, 132.6, 130.8, 129.3, 127.5, 126.6. **HRMS** *m/z* (ESI): calcd. for C<sub>14</sub>H<sub>12</sub>NO<sub>5</sub> [M-H]<sup>-</sup>: 274.0721, found: 274.0722 **HRMS** *m/z* (ESI): calcd. for C<sub>7</sub>H<sub>3</sub>D<sub>3</sub>Cl<sub>2</sub>S [M+H]<sup>+</sup>: 195.9828, found: 195.9825.

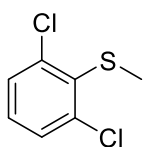

**2l**: (2,6-dichlorophenyl)(methyl)sulfane

**2l** was synthesized according to the **General procedure A** With **1l** (0.2 mmol, 36 mg), **Cat.1** (5.5 mg, 10 mol%), Zn(OTf)<sub>2</sub> (7.2 mg, 10 mol%), MeOH (16 μL, 2.0 equiv.) and HFIP (0.5 mL, 0.4 M). The reaction was stirred at 150 °C for 24 h then quenched by adding K<sub>2</sub>CO<sub>3</sub> (20 mol%), filtration and then washing the solid with DCM, the combined organic phase was concentrated under reduced pressure and the residue was purified using flash column chromatography (PE/EtOAc = 50:1) on silica gel to give the desired products **2l** (34.7 mg, 90%) as a white solid. **<sup>1</sup>H NMR** (600 MHz, CDCl<sub>3</sub>) δ 7.36 (d, *J* = 8.0 Hz, 2H), 7.16 (t, *J* = 7.9 Hz, 1H), 2.44 (s, 3H). **<sup>13</sup>C NMR** (101 MHz, CDCl<sub>3</sub>) δ 141.1, 134.7, 129.8, 128.7, 18.4. **HRMS** *m/z* (ESI): calcd. for C<sub>7</sub>H<sub>6</sub>Cl<sub>2</sub>S [M+H]<sup>+</sup>: 192.9640, found: 192.9647.

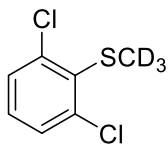

**2l-d<sub>3</sub>**: (2,6-dichlorophenyl)(methyl-d<sub>3</sub>)sulfane

**2l-d<sub>3</sub>** was synthesized according to the **General procedure A** With **1l** (0.2 mmol, 36 mg), **Cat.1** (5.5 mg, 10 mol%), Zn(OTf)<sub>2</sub> (7.2 mg, 10 mol%), CD<sub>3</sub>OD (16 μL, 2.0 equiv.) and HFIP (0.5 mL, 0.4 M). The reaction was stirred at 150 °C for 24 h then quenched by adding K<sub>2</sub>CO<sub>3</sub> (20 mol%), filtration and then

washing the solid with DCM, the combined organic phase was concentrated under reduced pressure and the residue was purified using flash column chromatography (PE/EtOAc = 50:1) on silica gel to give the desired products **2l-d<sub>3</sub>** (38.4 mg, 98%) as a colorless oil. **<sup>1</sup>H NMR** (400 MHz, CDCl<sub>3</sub>) δ 7.38 (d, *J* = 8.0 Hz, 2H), 7.19 – 7.15 (m, 1H). **<sup>13</sup>C NMR** (101 MHz, CDCl<sub>3</sub>) δ 141.1, 134.6, 129.8, 128.7. **HRMS** *m/z* (ESI): calcd. for C<sub>7</sub>H<sub>3</sub>D<sub>3</sub>Cl<sub>2</sub>S [M+H]<sup>+</sup>: 195.9828, found: 195.9823.

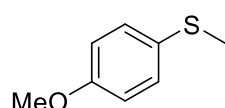

**2m**: (4-methoxyphenyl)(methyl)sulfane<sup>15</sup>

**2m** was synthesized according to the **General procedure B** With **1m** (0.2 mmol, 28 mg), **Cat.1** (5.5 mg, 10 mol%), Zn(OTf)<sub>2</sub> (7.2 mg, 10 mol%), MeOH (40 μL, 5.0 equiv.) and Hexane (0.5 mL, 0.4 M). The reaction was stirred at 150 °C for 24 h then quenched by adding K<sub>2</sub>CO<sub>3</sub> (20 mol%), filtration and then washing the solid with DCM, the combined organic phase was concentrated under reduced pressure and the residue was purified using flash column chromatography (PE/EtOAc = 10:1) on silica gel to give the desired products **2m** (24.6 mg, 80%) as a colorless oil. **<sup>1</sup>H NMR** (600 MHz, CDCl<sub>3</sub>) δ 7.27 (d, *J* = 8.7 Hz, 2H), 6.85 (d, *J* = 8.7 Hz, 2H), 3.79 (s, 3H), 2.44 (s, 3H). **<sup>13</sup>C NMR** (101 MHz, CDCl<sub>3</sub>) δ 158.3, 130.3, 128.9, 114.7, 55.5, 18.2. The spectroscopic data were according to the literature report.

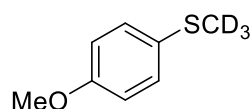

**2m-d<sub>3</sub>**: (4-methoxyphenyl)(methyl d<sub>3</sub>)sulfane<sup>16</sup>

**2m-d<sub>3</sub>** was synthesized according to the **General procedure B** With **1m** (0.2 mmol, 28 mg), **Cat.1** (5.5 mg, 10 mol%), Zn(OTf)<sub>2</sub> (7.2 mg, 10 mol%), CD<sub>3</sub>OH (40 μL, 5.0 equiv.) and Hexane (0.5 mL, 0.4 M). The reaction was stirred at 150 °C for 24 h then quenched by adding K<sub>2</sub>CO<sub>3</sub> (20 mol%), filtration and then washing the solid with DCM, the combined organic phase was concentrated under reduced pressure and the residue was purified using flash column chromatography (PE/EtOAc = 10:1) on silica gel to give the desired products **2m-d<sub>3</sub>** (20.4 mg, 65%) as a colorless oil. **<sup>1</sup>H NMR** (400 MHz, CDCl<sub>3</sub>) δ 7.28 (d, *J* = 8.7 Hz, 2H), 6.85 (d, *J* = 8.9 Hz, 2H), 3.79 (s, 3H). **<sup>13</sup>C NMR** (101 MHz, CDCl<sub>3</sub>) δ 158.3, 130.3, 128.8, 114.8, 55.5. The spectroscopic data were according to the literature report.

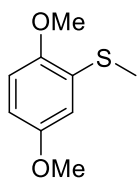

**2n**: (2,5-dimethoxyphenyl)(methyl)sulfane<sup>17</sup>

**2n** was synthesized according to the **General procedure B** With **1n** (0.2 mmol, 34 mg), **Cat.1** (5.5 mg, 10 mol%), Zn(OTf)<sub>2</sub> (7.2 mg, 10 mol%), MeOH (40  $\mu$ L, 5.0 equiv.) and Hexane (0.5 mL, 0.4 M). The reaction was stirred at 150 °C for 24 h then quenched by adding K<sub>2</sub>CO<sub>3</sub> (20 mol%), filtration and then washing the solid with DCM, the combined organic phase was concentrated under reduced pressure and the residue was purified using flash column chromatography (PE/EtOAc = 10:1) on silica gel to give the desired products **2n** (22.8 mg, 62%) as a colorless oil. <sup>1</sup>H NMR (600 MHz, CDCl<sub>3</sub>)  $\delta$  6.76 – 6.74 (m, 2H), 6.65 – 6.63 (m, 1H), 3.85 (s, 3H), 3.78 (s, 3H), 2.42 (s, 3H). <sup>13</sup>C NMR (101 MHz, CDCl<sub>3</sub>)  $\delta$  154.3, 150.7, 128.5, 113.1, 111.1, 109.5, 56.5, 55.8, 14.8. The spectroscopic data were according to the literature report.

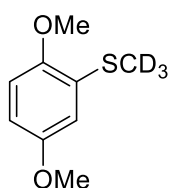

**2n-d<sub>3</sub>**: (2,5-dimethoxyphenyl)(methyl-d<sub>3</sub>)sulfane

**2n-d<sub>3</sub>** was synthesized according to the **General procedure B** With **1n** (0.2 mmol, 34 mg), **Cat.1** (5.5 mg, 10 mol%), Zn(OTf)<sub>2</sub> (7.2 mg, 10 mol%), CD<sub>3</sub>OH (40  $\mu$ L, 5.0 equiv.) and Hexane (0.5 mL, 0.4 M). The reaction was stirred at 150 °C for 24 h then quenched by adding K<sub>2</sub>CO<sub>3</sub> (20 mol%), filtration and then washing the solid with DCM, the combined organic phase was concentrated under reduced pressure and the residue was purified using flash column chromatography (PE/EtOAc = 10:1) on silica gel to give the desired products **2n-d<sub>3</sub>** (22.5 mg, 60%) as a colorless oil. <sup>1</sup>H NMR (600 MHz, CDCl<sub>3</sub>)  $\delta$  6.76 – 6.73 (m, 2H), 6.65-6.63 (m, 1H), 3.85 (s, 3H), 3.78 (s, 3H), 2.42 (s, 1.92 H, 36% D). <sup>13</sup>C NMR (101 MHz, CDCl<sub>3</sub>)  $\delta$  154.3, 150.8, 128.5, 113.2, 111.1, 109.5, 56.5, 55.9, 14.8. HRMS m/z (ESI): calcd. for C<sub>9</sub>H<sub>9</sub>D<sub>3</sub>O<sub>2</sub>S [M+H]<sup>+</sup>: 188.0819, found: 188.0816.

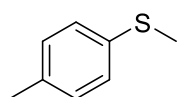

**2o**: methyl(*p*-tolyl)sulfane<sup>18</sup>

**2o** was synthesized according to the **General procedure A** With **1o** (0.2 mmol, 25 mg), **Cat.1** (5.5 mg, 10 mol%), Zn(OTf)<sub>2</sub> (7.2 mg, 10 mol%), MeOH (16  $\mu$ L, 2.0 equiv.) and HFIP (0.5 mL, 0.4M). The reaction was stirred at 150 °C for 24 h

then quenched by adding  $\text{K}_2\text{CO}_3$  (20 mol%), filtration and then washing the solid with DCM, the combined organic phase was concentrated under reduced pressure and the residue was purified using flash column chromatography (100% petroleum ether) on silica gel to give the desired products **2o** (26.5 mg, 96%) as a colorless oil.  **$^1\text{H}$  NMR** (600 MHz,  $\text{CDCl}_3$ )  $\delta$  7.17 (d,  $J$  = 8.2 Hz, 2H), 7.11 (d,  $J$  = 8.1 Hz, 2H), 2.45 (s, 3H), 2.31 (s, 3H).  **$^{13}\text{C}$  NMR** (101 MHz,  $\text{CDCl}_3$ )  $\delta$  135.1, 134.8, 129.7, 127.4, 21.0, 16.6. The spectroscopic data were according to the literature report.

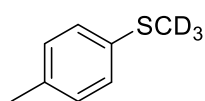

**2o-d<sub>3</sub>**: (methyl-d<sub>3</sub>)(*p*-tolyl)sulfane<sup>19</sup>

**2o-d<sub>3</sub>** was synthesized according to the **General procedure A** With **1o** (0.2 mmol, 25 mg), **Cat.1** (5.5 mg, 10 mol%),  $\text{Zn}(\text{OTf})_2$  (7.2 mg, 10 mol%),  $\text{CD}_3\text{OD}$  (16  $\mu\text{L}$ , 2.0 equiv.) and HFIP (0.5 mL, 0.4 M). The reaction was stirred at 150 °C for 24 h then quenched by adding  $\text{K}_2\text{CO}_3$  (20 mol%), filtration and then washing the solid with DCM, the combined organic phase was concentrated under reduced pressure and the residue was purified using flash column chromatography (100% petroleum ether) on silica gel to give the desired products **2o-d<sub>3</sub>** (27.6 mg, 98%) as a Colorless oil.  **$^1\text{H}$  NMR** (400 MHz,  $\text{CDCl}_3$ )  $\delta$  7.17 (d,  $J$  = 8.3 Hz, 2H), 7.11 (d,  $J$  = 8.0 Hz, 2H), 2.31 (s, 3H).  **$^{13}\text{C}$  NMR** (101 MHz,  $\text{CDCl}_3$ )  $\delta$  135.2, 134.8, 129.7, 127.4, 21.1. The spectroscopic data were according to the literature report.

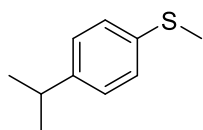

**2p**: (4-isopropylphenyl)(methyl)sulfane<sup>20</sup>

**2p** was synthesized according to the **General procedure A** With **1p** (0.2 mmol, 31 mg), **Cat.1** (5.5 mg, 10 mol%),  $\text{Zn}(\text{OTf})_2$  (7.2 mg, 10 mol%), MeOH (16  $\mu\text{L}$ , 2.0 equiv.) and HFIP (0.5 mL, 0.4 M). The reaction was stirred at 150 °C for 24 h then quenched by adding  $\text{K}_2\text{CO}_3$  (20 mol%), filtration and then washing the solid with DCM, the combined organic phase was concentrated under reduced pressure and the residue was purified using flash column chromatography (100% petroleum ether) on silica gel to give the desired products **2p** (30.5 mg, 92%) as a colorless oil.  **$^1\text{H}$  NMR** (600 MHz,  $\text{CDCl}_3$ )  $\delta$  7.22 (d,  $J$  = 8.2 Hz, 2H), 7.16 (d,  $J$  = 8.0 Hz, 2H), 2.88 (p,  $J$  = 6.8 Hz, 1H), 2.48 (s, 3H), 1.24 (d,  $J$  = 6.9 Hz, 6H).  **$^{13}\text{C}$  NMR**

(101 MHz, CDCl<sub>3</sub>)  $\delta$  146.3, 135.2, 127.4, 127.1, 33.8, 24.1, 16.5. The spectroscopic data were according to the literature report.

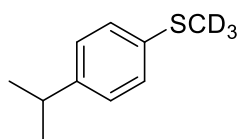

**2p-d<sub>3</sub>**: (4-isopropylphenyl)(methyl-d<sub>3</sub>)sulfane

**2p-d<sub>3</sub>** was synthesized according to the **General procedure A**

With **1p** (0.2 mmol, 31 mg), **Cat.1** (5.5 mg, 10 mol%), Zn(OTf)<sub>2</sub> (7.2 mg, 10 mol%), CD<sub>3</sub>OD (16  $\mu$ L, 2.0 equiv.) and HFIP (0.5 mL, 0.4 M). The reaction was stirred at 150 °C for 24 h then quenched by adding K<sub>2</sub>CO<sub>3</sub> (20 mol%), filtration and then washing the solid with DCM, the combined organic phase was concentrated under reduced pressure and the residue was purified using flash column chromatography (100% petroleum ether) on silica gel to give the desired products **2p-d<sub>3</sub>** (30.5 mg, 90%) as a colorless oil. **<sup>1</sup>H NMR** (600 MHz, CDCl<sub>3</sub>)  $\delta$  7.22 (d, *J* = 7.9 Hz, 2H), 7.15 (d, *J* = 7.4 Hz, 2H), 2.87 (p, *J* = 6.8 Hz, 1H), 1.23 (d, *J* = 6.9 Hz, 6H).; **<sup>13</sup>C NMR** (101 MHz, CDCl<sub>3</sub>)  $\delta$  146.2, 135.1, 127.4, 127.1, 33.8, 24.1. **HRMS** *m/z* (ESI): calcd. for C<sub>10</sub>H<sub>11</sub>D<sub>3</sub>S [M+H]<sup>+</sup>: 170.1077, found: 170.1072.

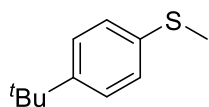

**2q**: (4-(tert-butyl)phenyl)(methyl)sulfane<sup>21</sup>

**2q** was synthesized according to the **General procedure A** With **1q** (0.2 mmol, 34 mg), **Cat.1** (5.5 mg, 10 mol%), Zn(OTf)<sub>2</sub> (7.2 mg, 10 mol%), MeOH (16  $\mu$ L, 2.0 equiv.) and HFIP (0.5 mL, 0.4 M). The reaction was stirred at 150 °C for 24 h then quenched by adding K<sub>2</sub>CO<sub>3</sub> (20 mol%), filtration and then washing the solid with DCM, the combined organic phase was concentrated under reduced pressure and the residue was purified using flash column chromatography (100% petroleum ether) on silica gel to give the desired products **2q** (33.2 mg, 92%) as a colorless oil. **<sup>1</sup>H NMR** (400 MHz, CDCl<sub>3</sub>)  $\delta$  7.34 – 7.31 (m, 2H), 7.24 – 7.21 (m, 2H), 2.48 (s, 3H), 1.31 (s, 9H). **<sup>13</sup>C NMR** (101 MHz, CDCl<sub>3</sub>)  $\delta$  148.5, 135.0, 127.1, 126.0, 34.5, 31.4, 16.4. The spectroscopic data were according to the literature report.

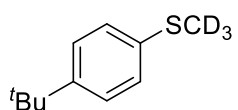

**2q-d<sub>3</sub>**: (4-(tert-butyl)phenyl)(methyl-d<sub>3</sub>)sulfane<sup>16</sup>

**2q-d<sub>3</sub>** was synthesized according to the **General procedure A** With **1q** (0.2 mmol, 34 mg), **Cat.1** (5.5 mg, 10 mol%), Zn(OTf)<sub>2</sub> (7.2 mg, 10 mol%),

CD<sub>3</sub>OD (16  $\mu$ L, 2.0 equiv.) and HFIP (0.5 mL, 0.4 M). The reaction was stirred at 150 °C for 24 h then quenched by adding K<sub>2</sub>CO<sub>3</sub> (20 mol%), filtration and then washing the solid with DCM, the combined organic phase was concentrated under reduced pressure and the residue was purified using flash column chromatography (100% petroleum ether) on silica gel to give the desired products **2q-d<sub>3</sub>** (35.6 mg, 97%) as a colorless oil. **<sup>1</sup>H NMR** (400 MHz, CDCl<sub>3</sub>)  $\delta$  7.33 – 7.31 (m, 2H), 7.23 – 7.21 (m, 2H), 1.31 (s, 9H), **<sup>13</sup>C NMR** (101 MHz, CDCl<sub>3</sub>)  $\delta$  148.5, 134.9, 127.0, 126.0, 34.5, 31.4. The spectroscopic data were according to the literature report.

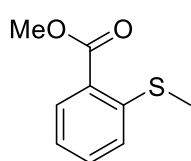

**2r**: methyl 2-(methylthio)benzoate<sup>22</sup>

**2r** was synthesized according to the **General procedure A** With **1r** (0.2 mmol, 34 mg), **Cat.1** (5.5 mg, 10 mol%), Zn(OTf)<sub>2</sub> (7.2 mg, 10 mol%), MeOH (16  $\mu$ L, 2.0 equiv.) and HFIP (0.5 mL, 0.4 M). The reaction was stirred at 150 °C for 24 h then quenched by adding K<sub>2</sub>CO<sub>3</sub> (20 mol%), filtration and then washing the solid with DCM, the combined organic phase was concentrated under reduced pressure and the residue was purified using flash column chromatography (PE/EtOAc = 10:1) on silica gel to give the desired products **2r** (30.2 mg, 83%) as a white solid. **<sup>1</sup>H NMR** (400 MHz, CDCl<sub>3</sub>)  $\delta$  8.01 (dd, *J* = 7.8, 1.4 Hz, 1H), 7.47 (td, *J* = 7.8, 1.5 Hz, 1H), 7.28 – 7.26 (m, 1H), 7.17 – 7.13 (m, 1H), 3.92 (s, 3H), 2.45 (s, 3H). **<sup>13</sup>C NMR** (101 MHz, CDCl<sub>3</sub>)  $\delta$  167.0, 143.4, 132.6, 131.5, 126.9, 124.5, 123.6, 52.2, 15.7. The spectroscopic data were according to the literature report.

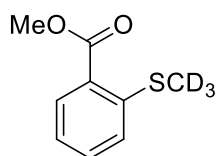

**2r-d<sub>3</sub>**: methyl 2-((methyl-d<sub>3</sub>) thio)benzoate<sup>23</sup>

**2r-d<sub>3</sub>** was synthesized according to the **General procedure A** With **1r** (0.2 mmol, 34 mg), **Cat.1** (5.5 mg, 10 mol%), Zn(OTf)<sub>2</sub> (7.2 mg, 10 mol%), CD<sub>3</sub>OD (16  $\mu$ L, 2.0 equiv.) and HFIP (0.5 mL, 0.4 M). The reaction was stirred at 150 °C for 24 h then quenched by adding K<sub>2</sub>CO<sub>3</sub> (20 mol%), filtration and then washing the solid with DCM, the combined organic phase was concentrated under reduced pressure and the residue was purified using flash column chromatography (PE/EtOAc = 10:1) on silica gel to give the desired products **2r-d<sub>3</sub>** (25.9 mg, 70%) as a



white solid.  $^1\text{H NMR}$  (600 MHz,  $\text{CDCl}_3$ ) 7.99 (d,  $J = 7.8$  Hz, 1H), 7.47 (t,  $J = 7.5$  Hz, 1H), 7.28 – 7.26 (m, 1H), 7.15 (t,  $J = 7.5$  Hz, 1H), 3.92 (s, 1.44H, 52%D), 2.46 (s, 0.7H, 77%D).  $^{13}\text{C NMR}$  (101 MHz,  $\text{CDCl}_3$ )  $\delta$  167.0, 143.4, 132.6, 131.5, 127.0, 124.5, 123.6, 52.2, 15.7. The spectroscopic data were according to the literature report.

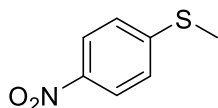

**2s**: methyl(4-nitrophenyl)sulfane<sup>7</sup>

**2s** was synthesized according to the **General procedure A** With **1s** (0.2 mmol, 32 mg), **Cat.1** (5.5 mg, 10 mol%),  $\text{ZnI}_2$  (6.4 mg, 10 mol%), MeOH (16  $\mu\text{L}$ , 2.0 equiv.) and HFIP (0.5 mL, 0.4 M). The reaction was stirred at 150 °C for 24 h then quenched by adding  $\text{K}_2\text{CO}_3$  (20 mol%), filtration and then washing the solid with DCM, the combined organic phase was concentrated under reduced pressure and the residue was purified using flash column chromatography (PE/EtOAc = 10:1) on silica gel to give the desired products **2s** (28.7 mg, 74%) as a yellow solid.  $^1\text{H NMR}$  (400 MHz,  $\text{CDCl}_3$ )  $\delta$  8.14 (d,  $J = 8.1$  Hz, 2H), 7.29 (d,  $J = 8.1$  Hz, 2H), 2.55 (s, 3H).  $^{13}\text{C NMR}$  (101 MHz,  $\text{CDCl}_3$ )  $\delta$  149.0, 144.9, 125.2, 124.1, 15.0. The spectroscopic data were according to the literature report.

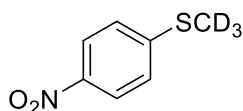

**2s-d<sub>3</sub>**: (methyl- $d_3$ ) (4-nitrophenyl)sulfane<sup>24</sup>

**2s-d<sub>3</sub>** was synthesized according to the **General procedure A** With **1s** (0.2 mmol, 32 mg), **Cat.1** (5.5 mg, 10 mol%),  $\text{ZnI}_2$  (6.4 mg, 10 mol%),  $\text{CD}_3\text{OD}$  (16  $\mu\text{L}$ , 2.0 equiv.) and HFIP (0.5 mL, 0.4 M). The reaction was stirred at 150 °C for 24 h then quenched by adding  $\text{K}_2\text{CO}_3$  (20 mol%), filtration and then washing the solid with DCM, the combined organic phase was concentrated under reduced pressure and the residue was purified using flash column chromatography (PE/EtOAc = 10:1) on silica gel to give the desired products **2s-d<sub>3</sub>** (31.5 mg, 80%) as a yellow solid.  $^1\text{H NMR}$  (400 MHz,  $\text{CDCl}_3$ )  $\delta$  8.15 (d,  $J = 8.9$  Hz, 2H), 7.30 (d,  $J = 8.9$  Hz, 2H).  $^{13}\text{C NMR}$  (101 MHz,  $\text{CDCl}_3$ )  $\delta$  149.0, 144.9, 125.2, 124.1. The spectroscopic data were according to the literature report.

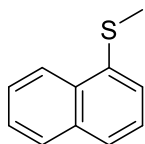

**2t:** methyl(naphthalen-1-yl)sulfane<sup>21</sup>

**2t** was synthesized according to the **General procedure A** With **1t** (0.2 mmol, 32 mg), **Cat.1** (5.5 mg, 10 mol%), Zn(OTf)<sub>2</sub> (7.2 mg, 10 mol%), MeOH (16 µL, 2.0 equiv.) and HFIP (0.5 mL, 0.4 M). The reaction was stirred at 150 °C for 24 h then quenched by adding K<sub>2</sub>CO<sub>3</sub> (20 mol%), filtration and then washing the solid with DCM, the combined organic phase was concentrated under reduced pressure and the residue was purified using flash column chromatography (100% petroleum ether) on silica gel to give the desired products **2t** (30.4 mg, 87%). as a colorless oil. <sup>1</sup>H NMR (400 MHz, CDCl<sub>3</sub>) δ 7.79 – 7.73 (m, 3H), 7.60 – 7.62 (m, 1H), 7.49 – 7.37 (m, 3H), 2.59 (s, 3H). <sup>13</sup>C NMR (101 MHz, CDCl<sub>3</sub>) δ 136.2, 134.0, 131.5, 128.3, 127.9, 127.0, 126.7, 125.8, 125.4, 123.6, 16.0. The spectroscopic data were according to the literature report.

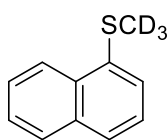

**2t-d<sub>3</sub>:** (methyl- d<sub>3</sub>)(naphthalen-1-yl)sulfane<sup>16</sup>

**2t-d<sub>3</sub>:** was synthesized according to the **General procedure A** With **1t** (0.2 mmol, 32 mg), **Cat.1** (5.5 mg, 10 mol%), Zn(OTf)<sub>2</sub> (7.2 mg, 10 mol%), CD<sub>3</sub>OD (16 µL, 2.0 equiv.) and HFIP (0.5 mL, 0.4 M). The reaction was stirred at 150 °C for 24 h then quenched by adding K<sub>2</sub>CO<sub>3</sub> (20 mol%), filtration and then washing the solid with DCM, the combined organic phase was concentrated under reduced pressure and the residue was purified using flash column chromatography (100% petroleum ether) on silica gel to give the desired products **2t-d<sub>3</sub>** (34.8 mg, 98%) as a colorless oil. <sup>1</sup>H NMR (400 MHz, CDCl<sub>3</sub>) δ 7.79 – 7.73 (m, 3H), 7.60 – 7.62 (m, 1H), 7.46 – 7.37 (m, 3H), <sup>13</sup>C NMR (101 MHz, CDCl<sub>3</sub>) δ 136.2, 134.1, 131.4, 128.3, 127.9, 127.0, 126.7, 125.9, 125.4, 123.5 The spectroscopic data were according to the literature report.

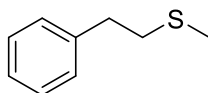

**2u:** methyl(phenethyl)sulfane<sup>25</sup>

**2u** was synthesized according to the **General procedure A** With **1u** (0.2 mmol, 28 mg), **Cat.1** (5.5 mg, 10 mol%), Zn(OTf)<sub>2</sub> (7.2 mg, 10 mol%), MeOH (16 µL, 2.0 equiv.) and HFIP (0.5 mL, 0.4 M). The reaction was stirred at 150 °C for 24 h

then quenched by adding  $K_2CO_3$  (20 mol%), filtration and then washing the solid with DCM, the combined organic phase was concentrated under reduced pressure and the residue was purified using flash column chromatography (100% petroleum ether) on silica gel to give the desired products **2u** (25.6 mg, 84%) as a colorless oil.  **$^1H$  NMR** (600 MHz,  $CDCl_3$ )  $\delta$  7.32 – 7.29 (m, 2H), 7.23 – 7.21 (m, 3H), 2.92 – 2.88 (m, 2H), 2.78 – 2.75 (m, 2H), 2.13 (s, 3H).  **$^{13}C$  NMR** (101 MHz,  $CDCl_3$ )  $\delta$  140.7, 128.6, 128.6, 126.5, 36.1, 36.0, 15.9. The spectroscopic data were according to the literature report.

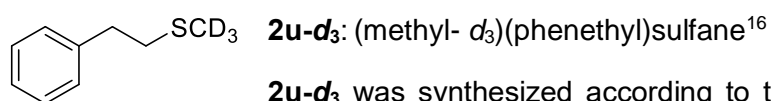

**2u- $d_3$**  was synthesized according to the **General procedure A** With **1u** (0.2 mmol, 28 mg), **Cat.1** (5.5 mg, 10 mol%),  $Zn(OTf)_2$  (7.2 mg, 10 mol%),  $CD_3OD$  (16  $\mu$ L, 2.0 equiv.) and HFIP (0.5 mL, 0.4 M). The reaction was stirred at 150 °C for 24 h then quenched by adding  $K_2CO_3$  (20 mol%), filtration and then washing the solid with DCM, the combined organic phase was concentrated under reduced pressure and the residue was purified using flash column chromatography (100% petroleum ether) on silica gel to give the desired products **2u- $d_3$**  (22.1 mg, 71%) as a colorless oil.  **$^1H$  NMR** (600 MHz,  $CDCl_3$ )  $\delta$  7.30 – 7.29 (m, 2H), 7.22 – 7.21 (m, 3H), 2.91 – 2.89 (m, 2H), 2.77 – 2.76 (m, 2H).  **$^{13}C$  NMR** (101 MHz,  $CDCl_3$ )  $\delta$  140.7, 128.6, 128.6, 126.5, 36.1, 35.8. The spectroscopic data were according to the literature report.

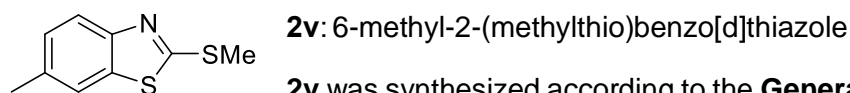

**2v** was synthesized according to the **General procedure A** With **1v** (0.2 mmol, 36 mg), **Cat.1** (5.5 mg, 10 mol%),  $Zn(OTf)_2$  (7.2 mg, 10 mol%), MeOH (16  $\mu$ L, 2.0 equiv.) and HFIP (0.5 mL, 0.4 M). The reaction was stirred at 150 °C for 24 h then quenched by adding  $K_2CO_3$  (20 mol%), filtration and then washing the solid with DCM, the combined organic phase was concentrated under reduced pressure and the residue was purified using flash column chromatography (PE/EtOAc = 10: 1) on silica gel to give the desired products **2v** (20.3 mg, 52%) as a colorless oil.  **$^1H$  NMR** (400 MHz,  $CDCl_3$ )  $\delta$  7.76 (d,  $J$  = 8.3 Hz, 1H), 7.55 (s, 1H), 7.23 (d,  $J$  = 8.3 Hz, 1H), 2.78 (s, 3H), 2.45 (s, 3H).  **$^{13}C$  NMR** (101 MHz,  $CDCl_3$ )  $\delta$  167.1, 151.4, 135.3, 134.4,

127.7, 121.0, 121.0, 21.5, 16.2. **HRMS**  $m/z$  (ESI): calcd. for  $C_9H_9NS_2$   $[M+H]^+$ : 196.0249, found: 196.0249.

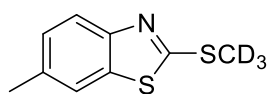

**2v-d<sub>3</sub>**: 6-methyl-2-((methyl-d<sub>3</sub>)thio)benzo[d]thiazole

**2v-d<sub>3</sub>** was synthesized according to the **General procedure A**

With **1v** (0.2 mmol, 36 mg), **Cat.1** (5.5 mg, 10 mol%),  $Zn(OTf)_2$  (7.2 mg, 10 mol%),  $CD_3OD$  (16  $\mu$ L, 2.0 equiv.) and HFIP (0.5 mL, 0.4 M). The reaction was stirred at 150 °C for 24 h then quenched by adding  $K_2CO_3$  (20 mol%), filtration and then washing the solid with DCM, the combined organic phase was concentrated under reduced pressure and the residue was purified using flash column chromatography (PE/EtOAc = 10: 1) on silica gel to give the desired products **2v-d<sub>3</sub>** (19.9 mg, 50%) as a colorless oil. **<sup>1</sup>H NMR** (600 MHz,  $CDCl_3$ )  $\delta$  7.76 (d,  $J$  = 8.3 Hz, 1H), 7.55 (s, 1H), 7.23 (d,  $J$  = 8.3 Hz, 1H), 2.45 (s, 3H). **<sup>13</sup>C NMR** (101 MHz,  $CDCl_3$ )  $\delta$  166.8, 151.6, 135.4, 134.3, 127.6, 121.0, 121.0, 21.5. **HRMS**  $m/z$  (ESI): calcd. for  $C_9H_6D_3NS_2$   $[M+H]^+$ : 199.0437, found: 199.0433.

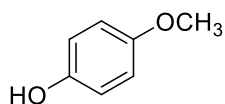

**2w**: 4-methoxyphenol<sup>26</sup>

**2w** was synthesized according to the **General procedure B**

With **1w** (2 mmol, 220 mg), **Cat.1** (55 mg, 10 mol%),  $Zn(OTf)_2$  (72 mg, 10 mol%),  $CH_3OH$  (400  $\mu$ L, 5.0 equiv.) and Hexane (5 mL, 0.4 M). The reaction was stirred at 150 °C for 24 h then quenched by adding  $K_2CO_3$  (20 mol%), filtration and then washing the solid with DCM, the combined organic phase was concentrated under reduced pressure and the residue was purified using flash column chromatography (PE/DCM=5:1) on silica gel to give the desired products **2w** (156 mg, 63%) as a yellow oil. **<sup>1</sup>H NMR** (600 MHz,  $CDCl_3$ )  $\delta$  6.80 – 6.77 (m, 4H), 3.77 (s, 3H). **<sup>13</sup>C NMR** (101 MHz,  $CDCl_3$ )  $\delta$  153.7, 149.6, 116.2, 115.1, 56.0. The spectroscopic data were according to the literature report.

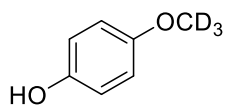

**2w-d<sub>3</sub>**: 4-(methoxy-d<sub>3</sub>)phenol

**2w-d<sub>3</sub>** was synthesized according to the **General procedure B**

With **1w** (2 mmol, 220 mg), **Cat.1** (55 mg, 10 mol%),  $Zn(OTf)_2$  (72 mg, 10 mol%),  $CD_3OH$  (400  $\mu$ L, 5.0 equiv.) and Hexane (5 mL, 0.4 M). The reaction was stirred at

150 °C for 24 h then quenched by adding K<sub>2</sub>CO<sub>3</sub> (20 mol%), filtration and then washing the solid with DCM, the combined organic phase was concentrated under reduced pressure and the residue was purified using flash column chromatography (PE/DCM=5:1) on silica gel to give the desired products **2w-d<sub>3</sub>** (153 mg, 60%) as a yellow oil. **<sup>1</sup>H NMR** (600 MHz, CDCl<sub>3</sub>) δ 6.81 – 6.75 (m, 4H). **<sup>13</sup>C NMR** (101 MHz, CDCl<sub>3</sub>) δ 153.8, 149.6, 116.2, 115.0. **HRMS** m/z (ESI): calcd. for C<sub>7</sub>H<sub>5</sub>D<sub>3</sub>O<sub>2</sub> [M-H]<sup>-</sup>: 126.0640, found: 126.0643

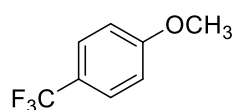

**2x**: 1-methoxy-4-(trifluoromethyl)benzene<sup>27</sup>

**2x** was synthesized according to the **General procedure A** With **1x** (0.2 mmol, 32.4 mg), **Cat.1** (5.5 mg, 10 mol%), Zn(OTf)<sub>2</sub> (7.2 mg, 10 mol%), CH<sub>3</sub>OH (16 μL, 2.0 equiv.) and HFIP (0.5 mL, 0.4 M). The reaction was stirred at 150 °C for 24 h then quenched by adding K<sub>2</sub>CO<sub>3</sub> (20 mol%), filtration and then washing the solid with DCM, the combined organic phase was concentrated under reduced pressure and the residue was purified using flash column chromatography (PE/EtOAc = 5:1) on silica gel to give the desired products **2x** (22 mg, 62%) as a colorless oil. **<sup>1</sup>H NMR** (400 MHz, CDCl<sub>3</sub>) δ 7.96 (d, *J* = 8.7 Hz, 2H), 6.87 (d, *J* = 8.5 Hz, 2H), 3.89 (s, 3H). The spectroscopic data were according to the literature report.

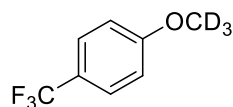

**2x-d<sub>3</sub>**: 1-(methoxy-*d*<sub>3</sub>)-4-(trifluoromethyl)benzene

**2x-d<sub>3</sub>** was synthesized according to the **General procedure A** With **1x** (0.2 mmol, 32.4 mg), **Cat.1** (5.5 mg, 10 mol%), Zn(OTf)<sub>2</sub> (7.2 mg, 10 mol%), CD<sub>3</sub>OH (16 μL, 2.0 equiv.) and HFIP (0.5 mL, 0.4 M). The reaction was stirred at 150 °C for 24 h then quenched by adding K<sub>2</sub>CO<sub>3</sub> (20 mol%), filtration and then washing the solid with DCM, the combined organic phase was concentrated under reduced pressure and the residue was purified using flash column chromatography (PE/EtOAc = 5:1) on silica gel to give the desired products **2x-d<sub>3</sub>** (23.3 mg, 65%) as a colorless oil. **<sup>1</sup>H NMR** (600 MHz, CDCl<sub>3</sub>) δ 7.95 (d, *J* = 8.7 Hz, 2H), 6.89 (d, *J* = 8.8 Hz, 2H). **<sup>13</sup>C NMR** (101 MHz, CDCl<sub>3</sub>) δ 167.2, 160.0, 132.1, 122.8, 115.4. **HRMS** m/z (ESI): calcd. for C<sub>14</sub>H<sub>12</sub>NO<sub>5</sub> [M+H]<sup>+</sup>: 180.0710, found: 180.0711.

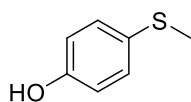

**2y**: 4-(methylthio)phenol<sup>26</sup>

**2y** was synthesized according to the **General procedure B** With **1y** (2 mmol, 252 mg), **Cat.1** (55 mg, 10 mol%), Zn(OTf)<sub>2</sub> (72 mg, 10 mol%), CH<sub>3</sub>OH (400 μL, 5.0 equiv.) and Hexane (5 mL, 0.4 M). The reaction was stirred at 150 °C for 24 h then quenched by adding K<sub>2</sub>CO<sub>3</sub> (20 mol%), filtration and then washing the solid with DCM, the combined organic phase was concentrated under reduced pressure and the residue was purified using flash column chromatography (PE/DCM = 5:1) on silica gel to give the desired products **2y** (236 mg, 84%) as a white solid. <sup>1</sup>H NMR (600 MHz, CDCl<sub>3</sub>) δ 7.23 (d, *J* = 8.2 Hz, 2H), 6.79 (d, *J* = 8.2 Hz, 2H), 2.44 (s, 3H). <sup>13</sup>C NMR (101 MHz, CDCl<sub>3</sub>) δ 154.2, 130.6, 129.1, 116.2, 18.2. The spectroscopic data were according to the literature report.

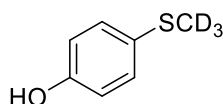

**2y-d<sub>3</sub>**: 4-((methyl-*d*<sub>3</sub>)thio)phenol

**2y-d<sub>3</sub>** was synthesized according to the **General procedure B** With **1y** (2 mmol, 252 mg), **Cat.1** (55 mg, 10 mol%), Zn(OTf)<sub>2</sub> (72 mg, 10 mol%), CD<sub>3</sub>OH (400 μL, 5.0 equiv.) and Hexane (5 mL, 0.4 M). The reaction was stirred at 150 °C for 24 h then quenched by adding K<sub>2</sub>CO<sub>3</sub> (20 mol%), filtration and then washing the solid with DCM, the combined organic phase was concentrated under reduced pressure and the residue was purified using flash column chromatography (PE/DCM = 5:1) on silica gel to give the desired products **2y-d<sub>3</sub>** (258 mg, 90%) as a white solid. <sup>1</sup>H NMR (400 MHz, CDCl<sub>3</sub>) δ 7.23 (d, *J* = 8.7 Hz, 2H), 6.77 (d, *J* = 8.7 Hz, 2H). <sup>13</sup>C NMR (101 MHz, CDCl<sub>3</sub>) δ 154.2, 130.5, 129.0, 116.2. **HRMS** *m/z* (ESI): calcd. for C<sub>7</sub>H<sub>5</sub>D<sub>3</sub>OS [M-H]<sup>-</sup>: 142.0411, found: 142.0415

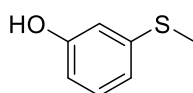

**2z**: 3-(methylthio)phenol<sup>28</sup>

**2z** was synthesized according to the **General procedure B** With **1z** (2 mmol, 252 mg), **Cat.1** (55 mg, 10 mol%), Zn(OTf)<sub>2</sub> (72 mg, 10 mol%), CH<sub>3</sub>OH (400 μL, 5.0 equiv.) and Hexane (5 mL, 0.4 M). The reaction was stirred at 150 °C for 24 h then quenched by adding K<sub>2</sub>CO<sub>3</sub> (20 mol%), filtration and then washing the solid with DCM, the combined organic phase was concentrated under reduced pressure and the

residue was purified using flash column chromatography (PE/DCM = 5:1) on silica gel to give the desired products **2z** (230 mg, 82%) as a colorless oil. **<sup>1</sup>H NMR** (600 MHz, CDCl<sub>3</sub>) δ 7.15 (t, *J* = 8.0 Hz, 1H), 6.83 (d, *J* = 7.8 Hz, 1H), 6.74 (t, *J* = 2.0 Hz, 1H), 6.59 (dd, *J* = 8.0, 2.0 Hz, 1H), 2.46 (s, 3H). **<sup>13</sup>C NMR** (101 MHz, CDCl<sub>3</sub>) δ 156.0, 140.3, 130.0, 119.0, 113.3, 112.2, 15.7. The spectroscopic data were according to the literature report.

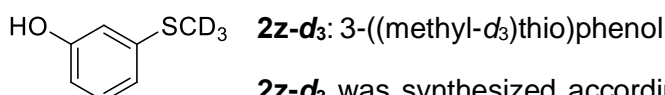

**2z-d<sub>3</sub>** was synthesized according to the **General procedure B** With **1z** (2 mmol, 252 mg), **Cat.1** (55 mg, 10 mol%), Zn(OTf)<sub>2</sub> (72 mg, 10 mol%), CD<sub>3</sub>OH (400 μL, 5.0 equiv.) and Hexane (5 mL, 0.4 M). The reaction was stirred at 150 °C for 24 h then quenched by adding K<sub>2</sub>CO<sub>3</sub> (20 mol%), filtration and then washing the solid with DCM, the combined organic phase was concentrated under reduced pressure and the residue was purified using flash column chromatography (PE/DCM = 5:1) on silica gel to give the desired products **2z-d<sub>3</sub>** (255 mg, 89%) as a colorless oil. **<sup>1</sup>H NMR** (600 MHz, CDCl<sub>3</sub>) δ 7.14 (t, *J* = 6.7 Hz, 1H), 6.82 (d, *J* = 7.2 Hz, 1H), 6.74 (s, 1H), 6.61 (d, *J* = 7.6 Hz, 1H). **<sup>13</sup>C NMR** (101 MHz, CDCl<sub>3</sub>) δ 156.0, 140.2, 130.0, 119.0, 113.3, 112.2. **HRMS** *m/z* (ESI): calcd. for C<sub>7</sub>H<sub>5</sub>D<sub>3</sub>OS [M-H]<sup>-</sup>: 142.0411, found: 142.0413

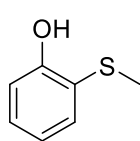

**2aa**: 2-(methylthio)phenol<sup>29</sup>

**2aa** was synthesized according to the **General procedure B** With **1aa** (2 mmol, 252 mg), **Cat.1** (55 mg, 10 mol%), Zn(OTf)<sub>2</sub> (72 mg, 10 mol%), CH<sub>3</sub>OH (400 μL, 5.0 equiv.) and Hexane (5 mL, 0.4 M). The reaction was stirred at 150 °C for 24 h then quenched by adding K<sub>2</sub>CO<sub>3</sub> (20 mol%), filtration and then washing the solid with DCM, the combined organic phase was concentrated under reduced pressure and the residue was purified using flash column chromatography (PE/DCM = 5:1) on silica gel to give the desired products **2aa** (249 mg, 89%) as a colorless oil. **<sup>1</sup>H NMR** (600 MHz, CDCl<sub>3</sub>) δ 7.49 (d, *J* = 7.7 Hz, 1H), 7.26 (t, *J* = 7.7 Hz, 1H), 7.01 (d, *J* = 8.1 Hz, 1H), 6.9 (t, *J* = 7.5 Hz, 1H), 2.34 (s, 3H). **<sup>13</sup>C NMR** (101 MHz, CDCl<sub>3</sub>) δ

156.5, 135.0, 130.9, 121.1, 115.0, 20.0. The spectroscopic data were according to the literature report.

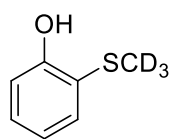

**2aa-d<sub>3</sub>**: 2-((methyl-d<sub>3</sub>)thio)phenol

**2aa-d<sub>3</sub>** was synthesized according to the **General procedure B** With **1aa** (2 mmol, 252 mg), **Cat.1** (55 mg, 10 mol%), Zn(OTf)<sub>2</sub> (72 mg, 10 mol%), CD<sub>3</sub>OH (400 μL, 5.0 equiv.) and Hexane (5 mL, 0.4 M). The reaction was stirred at 150 °C for 24 h then quenched by adding K<sub>2</sub>CO<sub>3</sub> (20 mol%), filtration and then washing the solid with DCM, the combined organic phase was concentrated under reduced pressure and the residue was purified using flash column chromatography (PE/DCM = 5:1) on silica gel to give the desired products **2aa-d<sub>3</sub>** (249 mg, 87%) as a colorless oil. **<sup>1</sup>H NMR** (400 MHz, CDCl<sub>3</sub>) δ 7.48 (d, *J* = 7.7 Hz, 1H), 7.228 – 7.24 (m, 1H), 7.01 (d, *J* = 8.1 Hz, 1H), 6.90 (t, *J* = 7.5 Hz, 1H), 6.72 (s, 1H). **<sup>13</sup>C NMR** (101 MHz, CDCl<sub>3</sub>) δ 156.3, 134.7, 130.7, 121.0, 114.9. **HRMS** *m/z* (ESI): calcd. for C<sub>7</sub>H<sub>5</sub>D<sub>3</sub>OS [M-H]<sup>-</sup>: 142.0411, found: 142.0411.

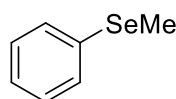

**2bb**: methyl(phenyl)selane

**2bb** was synthesized according to the **General procedure A** With **1bb** (0.2 mmol, 252 mg), **Cat.1** (5.5 mg, 10 mol%), Zn(OTf)<sub>2</sub> (7.2 mg, 10 mol%), CD<sub>3</sub>OH (16 μL, 2.0 equiv.) and HFIP (0.5 mL, 0.4 M). The reaction was stirred at 150 °C for 24 h then quenched by adding K<sub>2</sub>CO<sub>3</sub> (20 mol%), and CH<sub>2</sub>Br<sub>2</sub> as an internal standard Subsequently, take sample 1-2 drops to check yield by NMR (NMR yield by 92%).

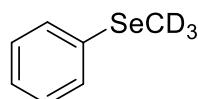

**2bb-d<sub>3</sub>**: (methyl-d<sub>3</sub>)(phenyl)selane

**2bb-d<sub>3</sub>** was synthesized according to the **General procedure B** With **1bb** (0.2 mmol, 252 mg), **Cat.1** (5.5 mg, 10 mol%), Zn(OTf)<sub>2</sub> (7.2 mg, 10 mol%), CD<sub>3</sub>OH (16 μL, 2.0 equiv.) and HFIP (0.5 mL, 0.4 M). The reaction was stirred at 150 °C for 24 h then quenched by adding K<sub>2</sub>CO<sub>3</sub> (20 mol%), and CH<sub>2</sub>Br<sub>2</sub> as an internal standard Subsequently, take sample 1-2 drops to check yield by NMR (NMR yield by 87%).



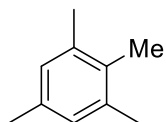

**2cc:** 1,2,3,5-tetramethylbenzene

**2cc** was synthesized according to the **General procedure C** With **1cc** (1 mmol, 120.2 mg), **Cat.1** (5.5 mg, 10 mol%),  $\text{Zn}(\text{OTf})_2$  (7.2 mg, 10 mol%),  $\text{CH}_3\text{OH}$  (8  $\mu\text{L}$ , 1.0 equiv.) and HFIP (0.5 mL, 0.4 M). The reaction was stirred at 150 °C for 48 h then quenched by adding  $\text{K}_2\text{CO}_3$  (20 mol%), and dodecane as an internal standard Subsequently, take sample 1-2 drops to check yield by GC (GC yield by 87%).

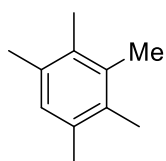

**2dd:** 1,2,3,4,5-pentamethylbenzene

**2dd** was synthesized according to the **General procedure C** With **1dd** (1 mmol, 134.2 mg), **Cat.1** (5.5 mg, 10 mol%),  $\text{Zn}(\text{OTf})_2$  (7.2 mg, 10 mol%),  $\text{CH}_3\text{OH}$  (8  $\mu\text{L}$ , 1.0 equiv.) and HFIP (0.5 mL, 0.4 M). The reaction was stirred at 150 °C for 48 h then quenched by adding  $\text{K}_2\text{CO}_3$  (20 mol%), and dodecane as an internal standard Subsequently, take sample 1-2 drops to check yield by GC (GC yield by 98%).

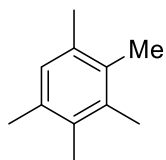

**2ee:** 1,2,3,4,5-pentamethylbenzene

**2ee** was synthesized according to the **General procedure C** With **1ee** (1 mmol, 134.2 mg), **Cat.1** (5.5 mg, 10 mol%),  $\text{Zn}(\text{OTf})_2$  (7.2 mg, 10 mol%),  $\text{CH}_3\text{OH}$  (8  $\mu\text{L}$ , 1.0 equiv.) and HFIP (0.5 mL, 0.4 M). The reaction was stirred at 150 °C for 48 h then quenched by adding  $\text{K}_2\text{CO}_3$  (20 mol%), and dodecane as an internal standard Subsequently, take sample 1-2 drops to check yield by GC (GC yield by 98%).

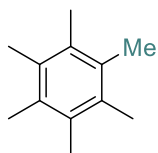

**2ff:** 1,2,3,4,5,6-hexamethylbenzene

**2ff** was synthesized according to the **General procedure C** With **1ff** (1 mmol, 148.2 mg), **Cat.1** (5.5 mg, 10 mol%),  $\text{Zn}(\text{OTf})_2$  (7.2 mg, 10 mol%),  $\text{CH}_3\text{OH}$  (8  $\mu\text{L}$ , 1.0 equiv.) and HFIP (0.5 mL, 0.4 M). The reaction was stirred at 150 °C for 48 h then quenched by adding  $\text{K}_2\text{CO}_3$  (20 mol%), and dodecane as an internal standard Subsequently, take sample 1-2 drops to check yield by GC (GC yield by 98%).

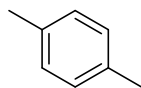

**2gg**: 1,2,4-trimethylbenzene

**2gg** was synthesized according to the **General procedure C** With **1gg** (1 mmol, 106.2 mg), **Cat.1** (5.5 mg, 10 mol%), Zn(OTf)<sub>2</sub> (7.2 mg, 10 mol%), CH<sub>3</sub>OH (8 μL, 1.0 equiv.) and HFIP (0.5 mL, 0.4 M). The reaction was stirred at 150 °C for 48 h then quenched by adding K<sub>2</sub>CO<sub>3</sub> (20 mol%), and dodecane as an internal standard. Subsequently, take sample 1-2 drops to check yield by GC (GC yield by 30%).

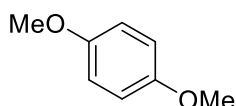

**2hh**: 1,4-dimethoxy-2-methylbenzene

**2hh** was synthesized according to the **General procedure C** With **1hh** (1 mmol, 138.2 mg), **Cat.1** (5.5 mg, 10 mol%), Zn(OTf)<sub>2</sub> (7.2 mg, 10 mol%), CH<sub>3</sub>OH (8 μL, 1.0 equiv.) and HFIP (0.5 mL, 0.4 M). The reaction was stirred at 150 °C for 48 h then quenched by adding K<sub>2</sub>CO<sub>3</sub> (20 mol%), and dodecane as an internal standard. Subsequently, take sample 1-2 drops to check yield by GC (GC yield by 30%).

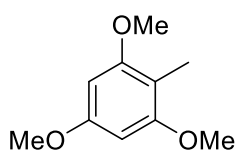

**2ii**: 1,4-dimethoxy-2-methylbenzene

**2ii** was synthesized according to the **General procedure C** With **1ii** (1 mmol, 168.2 mg), **Cat.1** (5.5 mg, 10 mol%), Zn(OTf)<sub>2</sub> (7.2 mg, 10 mol%), CH<sub>3</sub>OH (8 μL, 1.0 equiv.) and HFIP (0.5 mL, 0.4 M). The reaction was stirred at 150 °C for 48 h then quenched by adding K<sub>2</sub>CO<sub>3</sub> (20 mol%), and dodecane as an internal standard. Subsequently, take sample 1-2 drops to check yield by GC (GC yield by 82%).

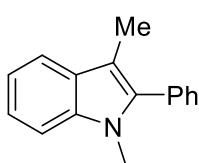

**2jj**: 1,3-dimethyl-2-phenyl-1H-indole<sup>30</sup>

**2jj** was synthesized according to the **General procedure A** With **1jj** (0.2 mmol, 41.5 mg), **Cat.1** (5.5 mg, 10 mol%), Zn(OTf)<sub>2</sub> (7.2 mg, 10 mol%), CH<sub>3</sub>OH (16 μL, 2.0 equiv.) and HFIP (0.5 mL, 0.4 M). The reaction was stirred at 150 °C for 24 h then quenched by adding K<sub>2</sub>CO<sub>3</sub> (20 mol%), filtration and then washing the solid with DCM, the combined organic phase was concentrated under reduced pressure and the residue was purified using flash column chromatography (PE/EtOAc = 10:1) on silica gel to give the desired products **2aa** (35.5 mg, 80%) as a

white solid.  $^1\text{H NMR}$  (600 MHz,  $\text{CDCl}_3$ )  $\delta$  7.61 (d,  $J = 7.9$  Hz, 1H), 7.53 – 7.48 (m, 2H), 7.43 – 7.40 (m, 3H), 7.33 (d,  $J = 8.2$  Hz, 1H), 7.27 – 7.25 (m, 2H), 7.16 (t,  $J = 7.4$  Hz, 1H), 3.62 (s, 3H), 2.29 (s, 3H).  $^{13}\text{C NMR}$  (101 MHz,  $\text{CDCl}_3$ )  $\delta$  141.5, 138.3, 132.8, 129.3, 128.5, 127.9, 127.8, 121.6, 120.4, 119.8, 109.6, 101.6, 31.1 The spectroscopic data were according to the literature report.

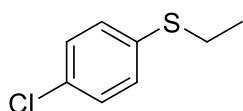

**2kk**: (4-chlorophenyl)(ethyl)sulfane<sup>31</sup>

**2kk** was synthesized according to the **General procedure A** With **1a** (0.2 mmol, 29 mg), **Cat.1** (5.5 mg, 10 mol%),  $\text{Zn}(\text{OTf})_2$  (7.2 mg, 10 mol%), alcohol (24  $\mu\text{L}$ , 2.0 equiv.) and HFIP (0.5 mL, 0.4 M). The reaction was stirred at 150 °C for 24 h then quenched by adding  $\text{K}_2\text{CO}_3$  (20 mol%), filtration and then washing the solid with DCM, the combined organic phase was concentrated under reduced pressure and the residue was purified using flash column chromatography (100% petroleum ether) on silica gel to give the desired products **2kk** (33.2 mg, 96%) as a colorless oil.  $^1\text{H NMR}$  (400 MHz,  $\text{CDCl}_3$ )  $\delta$  7.24 (s, 4H), 2.93 (q,  $J = 7.4$  Hz, 2H), 1.30 (t,  $J = 7.4$  Hz, 3H).  $^{13}\text{C NMR}$  (101 MHz,  $\text{CDCl}_3$ )  $\delta$  135.3, 131.9, 130.5, 129.1, 28.0, 14.4. The spectroscopic data were according to the literature report.

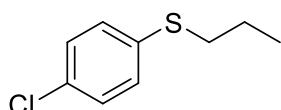

**2II**: (4-chlorophenyl)(propyl)sulfane<sup>32</sup>

**2II** was synthesized according to the **General procedure A** With **1a** (0.2 mmol, 29 mg), **Cat.1** (5.5 mg, 10 mol%),  $\text{Zn}(\text{OTf})_2$  (7.2 mg, 10 mol%), alcohol (30  $\mu\text{L}$ , 2.0 equiv.) and HFIP (0.5 mL, 0.4 M). The reaction was stirred at 150 °C for 24 h then quenched by adding  $\text{K}_2\text{CO}_3$  (20 mol%), filtration and then washing the solid with DCM, the combined organic phase was concentrated under reduced pressure and the residue was purified using flash column chromatography (100% petroleum ether) on silica gel to give the desired products **2II** (36.2 mg, 97%) as a colorless oil.  $^1\text{H NMR}$  (400 MHz,  $\text{CDCl}_3$ )  $\delta$  7.24 (s, 4H), 2.87 (t,  $J = 7.3$  Hz, 2H), 1.65 (q,  $J = 7.3$  Hz, 2H), 1.02 (t,  $J = 7.3$  Hz, 3H).  $^{13}\text{C NMR}$  (101 MHz,  $\text{CDCl}_3$ )  $\delta$  135.6, 131.8, 130.4, 129.1, 36.0, 22.5, 13.5. The spectroscopic data were according to the literature report.

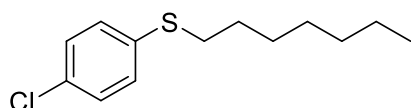

**2mm:** (4-chlorophenyl)(heptyl)sulfane

**2mm** was synthesized according to the **general procedure A** With **1a** (0.2 mmol, 29 mg), **Cat.1** (5.5 mg, 10 mol%), Zn(OTf)<sub>2</sub> (7.2 mg, 10 mol%), alcohol (57  $\mu$ L, 2.0 equiv.) and HFIP (0.5 mL, 0.4 M). The reaction was stirred at 150 °C for 24 h then quenched by adding K<sub>2</sub>CO<sub>3</sub> (20 mol%), filtration and then washing the solid with DCM, the combined organic phase was concentrated under reduced pressure and the residue was purified using flash column chromatography (100% petroleum ether) on silica gel to give the desired products **2mm** (47.1 mg, 97%) as a colorless oil. **<sup>1</sup>H NMR** (600 MHz, CDCl<sub>3</sub>)  $\delta$  7.24 (s, 4H), 2.88 (t,  $J$  = 7.4 Hz, 2H), 1.63 (p,  $J$  = 7.4 Hz, 2H), 1.42 – 1.38 (m, 2H), 1.30 – 1.26 (m, 6H), 0.88 (t,  $J$  = 6.6 Hz, 3H). **<sup>13</sup>C NMR** (101 MHz, CDCl<sub>3</sub>)  $\delta$  135.7, 131.7, 130.3, 129.1, 34.0, 31.8, 29.2, 29.0, 28.9, 22.7, 14.2. **HRMS**  $m/z$  (ESI): calcd. for C<sub>13</sub>H<sub>19</sub>ClS [M+H]<sup>+</sup>: 243.0969, found: 243.0967.

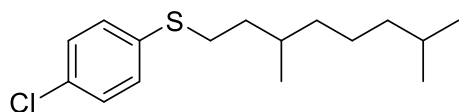

**2nn:** (4-chlorophenyl)(3,7-dimethyloctyl)sulfane

**2nn:** was synthesized according to the **General procedure A** With **1a** (0.2 mmol, 29 mg), **Cat.1** (5.5 mg, 10 mol%), Zn(OTf)<sub>2</sub> (7.2 mg, 10 mol%), alcohol (76  $\mu$ L, 2.0 equiv.) and HFIP (0.5 mL, 0.4 M). The reaction was stirred at 150 °C for 24 h then quenched by adding K<sub>2</sub>CO<sub>3</sub> (20 mol%), filtration and then washing the solid with DCM, the combined organic phase was concentrated under reduced pressure and the residue was purified using flash column chromatography (100% petroleum ether) on silica gel to give the desired products **2nn** (45 mg, 79%) as a white solid. **<sup>1</sup>H NMR** (600 MHz, CDCl<sub>3</sub>)  $\delta$  7.24 (s, 4H), 2.96 – 2.84 (m, 2H), 1.65 – 1.61 (m, 1H), 1.52 – 1.42 (m, 2H), 1.31 – 1.19 (m, 4H), 1.15 – 1.12 (m, 3H), 0.9 (d,  $J$  = 6.4 Hz, 3H), 0.87 (d,  $J$  = 6.5 Hz, 6H). **<sup>13</sup>C NMR** (101 MHz, CDCl<sub>3</sub>)  $\delta$  135.7, 131.7, 130.3, 129.1, 39.3, 37.0, 36.3, 32.3, 31.9, 28.1, 24.8, 22.8, 22.7, 19.5. **HRMS**  $m/z$  (ESI): calcd. for C<sub>16</sub>H<sub>26</sub>ClS [M+H]<sup>+</sup>: 285.1438, found: 285.1435.

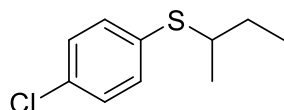

**2oo:** sec-butyl(4-chlorophenyl)sulfane

**2oo** was synthesized according to the **General procedure A**

With **1a** (0.2 mmol, 29 mg), **Cat.1** (5.5 mg, 10 mol%), Zn(OTf)<sub>2</sub> (7.2 mg, 10 mol%), alcohol (37  $\mu$ L, 2.0 equiv.) and HFIP (0.5 mL, 0.4 M). The reaction was stirred at 150 °C for 24 h then quenched by adding K<sub>2</sub>CO<sub>3</sub> (20 mol%), filtration and then washing the solid with DCM, the combined organic phase was concentrated under reduced pressure and the residue was purified using flash column chromatography (100% petroleum ether) on silica gel to give the desired products **2oo** (36.1 mg, 90%) as a colorless oil. **<sup>1</sup>H NMR** (600 MHz, CDCl<sub>3</sub>)  $\delta$  7.32 – 7.31 (m, 2H), 7.26 – 7.25 (m, 2H), 3.12 (p, *J* = 6.5 Hz, 1H), 1.66 – 1.50 (m, 2H), 1.26 (d, *J* = 6.4 Hz, 3H), 1.00 (t, *J* = 7.3 Hz, 3H). **<sup>13</sup>C NMR** (101 MHz, CDCl<sub>3</sub>)  $\delta$  134.2, 133.4, 132.8, 129.0, 45.4, 29.5, 20.6, 11.6. **HRMS** *m/z* (ESI): calcd. for C<sub>10</sub>H<sub>14</sub>ClS[M+H]<sup>+</sup>: 201.0499, found: 201.0497.

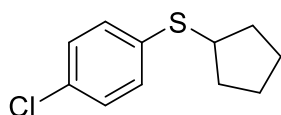

**2pp**: (4-chlorophenyl)(cyclopentyl)sulfane<sup>33</sup>

**2pp** was synthesized according to the **General procedure A**

With **1a** (0.2 mmol, 29 mg), **Cat.1** (5.5 mg, 10 mol%), Zn(OTf)<sub>2</sub> (7.2 mg, 10 mol%), alcohol (37  $\mu$ L, 2.0 equiv.) and HFIP (0.5 mL, 0.4 M). The reaction was stirred at 150 °C for 24 h then quenched by adding K<sub>2</sub>CO<sub>3</sub> (20 mol%), filtration and then washing the solid with DCM, the combined organic phase was concentrated under reduced pressure and the residue was purified using flash column chromatography (100% petroleum ether) on silica gel to give the desired products **2pp** (37 mg, 87%) as a colorless oil. **<sup>1</sup>H NMR** (600 MHz, CDCl<sub>3</sub>)  $\delta$  7.31 – 7.26 (m, 4H), 3.60 – 3.55 (p, *J* = 7.4, 6.8 Hz, 1H), 2.17 – 2.04 (m, 2H), 1.84 – 1.76 (m, 2H), 1.68 – 1.60 (m, 2H), 1.33 – 1.28 (m, 2H). **<sup>13</sup>C NMR** (101 MHz, CDCl<sub>3</sub>)  $\delta$  136.0, 132.1, 131.5, 129.0, 46.4, 33.6, 24.9.

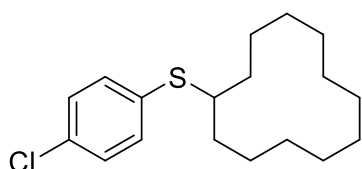

**2qq**: (4-chlorophenyl)(cyclododecyl)sulfane<sup>34</sup>

**2qq** was synthesized according to the **General procedure A** With **1a** (0.2 mmol, 29 mg), **Cat.1** (5.5 mg,

10 mol%), Zn(OTf)<sub>2</sub> (7.2 mg, 10 mol%), alcohol (74 mg, 2.0 equiv.) and HFIP (0.5 mL, 0.4 M). The reaction was stirred at 150 °C for 24 h then quenched by adding K<sub>2</sub>CO<sub>3</sub> (20 mol%), filtration and then washing the solid with DCM,

the combined organic phase was concentrated under reduced pressure and the residue was purified using flash column chromatography (100% petroleum ether) on silica gel to give the desired products **2qq** (47.3 mg, 76%) as a white solid. **<sup>1</sup>H NMR** (600 MHz, CDCl<sub>3</sub>) δ 7.33 – 7.29 (m, 2H), 7.27 – 7.23 (m, 2H), 3.26 – 3.19 (m, 1H), 1.76 – 1.66 (m, 2H), 1.60 – 1.49 (m, 4H), 1.47 – 1.31 (m, 16H). **<sup>13</sup>C NMR** (101 MHz, CDCl<sub>3</sub>) δ 134.7, 132.8, 132.6, 129.1, 45.4, 30.0, 24.3, 24.0, 23.5, 23.5, 22.3.

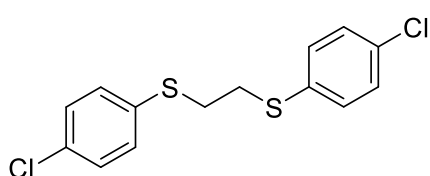

**2rr**: 1,2-bis((4-chlorophenyl)thio)ethane<sup>35</sup>

**2rr** was synthesized according to the **General procedure A** With **1a** (0.6 mmol, 87 mg), **Cat.1** (11 mg, 10 mol%), Zn(OTf)<sub>2</sub> (14.4 mg, 10 mol%), alcohol (12 μL, 0.2 mmol) and HFIP (0.5 mL, 0.4 M). The reaction was stirred at 150 °C for 24 h then quenched by adding K<sub>2</sub>CO<sub>3</sub> (20 mol%), filtration and then washing the solid with DCM, the combined organic phase was concentrated under reduced pressure and the residue was purified using flash column chromatography (100% petroleum ether) on silica gel to give the desired products **2rr** (49 mg, 77%) as a white solid. **<sup>1</sup>H NMR** (600 MHz, CDCl<sub>3</sub>) δ 7.26 – 7.22 (m, 8H), 3.03 (s, 4H). **<sup>13</sup>C NMR** (101 MHz, CDCl<sub>3</sub>) δ 133.6, 133.0, 131.7, 129.4, 33.8.

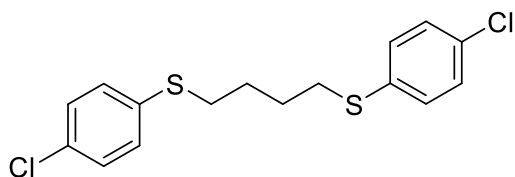

**2ss**: 1,2-bis((4-chlorophenyl)thio)ethane

**2ss** was synthesized according to the **General procedure A** With **1a** (0.6 mmol, 87 mg), **Cat.1** (11 mg, 10 mol%), Zn(OTf)<sub>2</sub> (14.4 mg, 10 mol%), alcohol (18 μL, 0.2 mmol) and HFIP (0.5 mL, 0.4 M). The reaction was stirred at 150 °C for 24 h then quenched by adding K<sub>2</sub>CO<sub>3</sub> (20 mol%), filtration and then washing the solid with DCM, the combined organic phase was concentrated under reduced pressure and the residue was purified using flash column chromatography (100% petroleum ether) on silica gel to give the desired products **2ss** (55.4 mg, 81%) as a colorless oil. **<sup>1</sup>H NMR** (600 MHz, CDCl<sub>3</sub>) δ 7.29 – 7.25 (m, 8H), 2.92 (s, 4H), 1.78 (s, 4H). **<sup>13</sup>C NMR** (101 MHz, CDCl<sub>3</sub>) δ 135.0, 132.1, 130.8, 129.2, 33.6, 28.0. **HRMS**

m/z (ESI): calcd. for C<sub>10</sub>H<sub>14</sub>ClS[M+H]<sup>+</sup>: 343.0143, found: 343.0140.

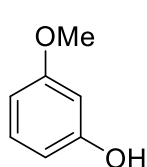

**4b**: 3-methoxyphenol<sup>29</sup>

**4b** was synthesized according to the **General procedure B** With **3b** (0.2 mmol, 22 mg), **Cat.1** (5.5 mg, 10 mol%), Zn(OTf)<sub>2</sub> (7.2 mg, 10 mol%), MeOH (40 μL, 5.0 equiv.) and Hexane (0.5 mL, 0.4 M). The reaction was stirred at 150 °C for 24 h then quenched by adding K<sub>2</sub>CO<sub>3</sub> (20 mol%), filtration and then washing the solid with DCM, the combined organic phase was concentrated under reduced pressure and the residue was purified using flash column chromatography (PE/EtOAc = 10:1) on silica gel to give the desired products **4b** (21 mg, 85%) as a colorless oil. <sup>1</sup>H NMR (600 MHz, CDCl<sub>3</sub>) δ 7.17 (t, *J* = 8.2 Hz, 1H), 6.56 – 6.54 (m, 1H), 6.51 – 6.47 (m, 2H), 3.80 (s, 3H). <sup>13</sup>C NMR (151 MHz, CDCl<sub>3</sub>) δ 160.8, 156.8, 130.3, 108.1, 106.6, 101.7, 55.4. The spectroscopic data were according to the literature report.

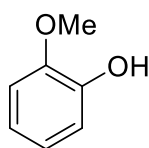

**4c**: 2-methoxyphenol<sup>36</sup>

**4c** was synthesized according to the **General procedure B** With **3c** (0.2 mmol, 22 mg), **Cat.1** (5.5 mg, 10 mol%), Zn(OTf)<sub>2</sub> (7.2 mg, 10 mol%), MeOH (40 μL, 5.0 equiv.) and Hexane (0.5 mL, 0.4 M). The reaction was stirred at 150 °C for 24 h then quenched by adding K<sub>2</sub>CO<sub>3</sub> (20 mol%), filtration and then washing the solid with DCM, the combined organic phase was concentrated under reduced pressure and the residue was purified using flash column chromatography (PE/EtOAc = 10:1) on silica gel to give the desired products **4c** (20 mg, 80%) as a colorless oil. <sup>1</sup>H NMR (600 MHz, CDCl<sub>3</sub>) δ 7.03 – 7.01 (m, 1H), 6.95 – 6.92 (m, 3H), 5.85 (s, 1H), 3.92 (s, 3H). <sup>13</sup>C NMR (151 MHz, CDCl<sub>3</sub>) δ 146.7, 145.7, 121.5, 120.2, 114.7, 110.9, 55.9. The spectroscopic data were according to the literature report.

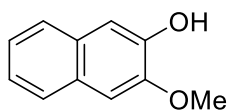

**4d**: 3-methoxynaphthalen-2-ol<sup>37</sup>

**4d** was synthesized according to the **General procedure B** With **3d** (0.2 mmol, 32 mg), **Cat.1** (5.5 mg, 10 mol%), Zn(OTf)<sub>2</sub> (7.2 mg, 10 mol%), MeOH (16 μL, 2.0 equiv.) and Hexane (0.5 mL, 0.4 M). The reaction was stirred at 150 °C for 24 h then quenched by adding K<sub>2</sub>CO<sub>3</sub> (20 mol%), filtration and

then washing the solid with DCM, the combined organic phase was concentrated under reduced pressure and the residue was purified using flash column chromatography (PE/EtOAc = 10:1) on silica gel to give the desired products **4d** (24.7 mg, 71%). as a yellow solid. **<sup>1</sup>H NMR** (600 MHz, CDCl<sub>3</sub>) δ 7.68 (td, *J* = 8.2, 6.8, 4.8 Hz, 2H), 7.35 – 7.31 (m, 2H), 7.26 (m, 1H), 7.13 (s, 1H), 4.02 (s, 3H). **<sup>13</sup>C NMR** (101 MHz, CDCl<sub>3</sub>) δ 147.5, 145.8, 129.8, 129.1, 126.6, 126.5, 124.4, 124.0, 109.5, 105.8, 56.0. The spectroscopic data were according to the literature report.

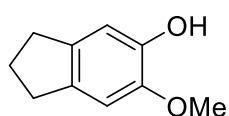

**4e**: 6-methoxy-2,3-dihydro-1H-inden-5-ol<sup>38</sup>

**4e** was synthesized according to the **General procedure B** With **3e** (0.2 mmol, 30 mg), **Cat.1** (5.5 mg, 10 mol%), Zn(OTf)<sub>2</sub> (7.2 mg, 10 mol%), MeOH (40 μL, 5.0 equiv.) and Hexane (0.5 mL, 0.4 M). The reaction was stirred at 150 °C for 24 h then quenched by adding K<sub>2</sub>CO<sub>3</sub> (20 mol%), filtration and then washing the solid with DCM, the combined organic phase was concentrated under reduced pressure and the residue was purified using flash column chromatography (PE/EtOAc = 10:1) on silica gel to give the desired products **4e** (15.5 mg, 47%) (61% yield by nmr) as a colorless oil. **<sup>1</sup>H NMR** (600 MHz, CDCl<sub>3</sub>) δ 6.80 (s, 1H), 6.75 (s, 1H), 3.86 (s, 3H), 2.83 (q, *J* = 7.6 Hz, 4H), 2.05 (p, *J* = 7.4 Hz, 2H). **<sup>13</sup>C NMR** (101 MHz, CDCl<sub>3</sub>) δ 147.5, 145.8, 129.8, 129.1, 126.6, 126.5, 124.4, 124.0, 109.5, 105.8, 56.0. The spectroscopic data were according to the literature report.

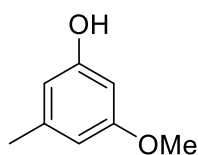

**4f**: 3-methoxy-5-methylphenol<sup>39</sup>

**4f** was synthesized according to the **General procedure B** With **3f** (0.2 mmol, 25 mg), **Cat.1** (5.5 mg, 10 mol%), Zn(OTf)<sub>2</sub> (7.2 mg, 10 mol%), MeOH (40 μL, 5.0 equiv.) and Hexane (0.5 mL, 0.4 M). The reaction was stirred at 150 °C for 24 h then quenched by adding K<sub>2</sub>CO<sub>3</sub> (20 mol%), filtration and then washing the solid with DCM, the combined organic phase was concentrated under reduced pressure and the residue was purified using flash column chromatography (PE/EtOAc = 10:1) on silica gel to give the desired products **4f** (21 mg, 76%) as a colorless oil. **<sup>1</sup>H NMR** (600 MHz, CDCl<sub>3</sub>) δ 6.32 (s, 1H), 6.26 (s, 1H), 6.23 (s, 1H), 3.76



(s, 3H), 2.27 (s, 3H).  $^{13}\text{C}$  NMR (101 MHz,  $\text{CDCl}_3$ )  $\delta$  160.9, 156.7, 140.7, 108.7, 107.5, 98.7, 55.4, 21.7. The spectroscopic data were according to the literature report.

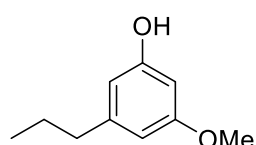

**4g**: 3-methoxy-5-propylphenol

**4g** was synthesized according to the **General procedure B** With **3g** (0.2 mmol, 31 mg), **Cat.1** (5.5 mg, 10 mol%),  $\text{Zn}(\text{OTf})_2$  (7.2 mg, 10 mol%), MeOH (40  $\mu\text{L}$ , 5.0 equiv.) and Hexane (0.5 mL, 0.4 M). The reaction was stirred at 150  $^\circ\text{C}$  for 24 h then quenched by adding  $\text{K}_2\text{CO}_3$  (20 mol%), filtration and then washing the solid with DCM, the combined organic phase was concentrated under reduced pressure and the residue was purified using flash column chromatography (PE/EtOAc = 10:1) on silica gel to give the desired products **4g** (28.3 mg, 85%) as a yellow oil.  $^1\text{H}$  NMR (400 MHz,  $\text{CDCl}_3$ )  $\delta$  6.35 (s, 1H), 6.29 (s, 1H), 6.26 (t,  $J$  = 2.2 Hz, 1H), 3.79 (s, 3H), 2.52 (t,  $J$  = 7.3 Hz, 2H), 1.68 – 1.59 (m, 2H), 0.95 (t,  $J$  = 7.3 Hz, 3H).  $^{13}\text{C}$  NMR (101 MHz,  $\text{CDCl}_3$ )  $\delta$  160.9, 156.6, 145.7, 108.1, 107.0, 98.8, 55.4, 38.3, 24.4, 14.0. HRMS  $m/z$  (ESI): calcd. for  $\text{C}_{10}\text{H}_{14}\text{O}_2$   $[\text{M}-\text{H}]^-$ : 165.0921, found: 165.0925

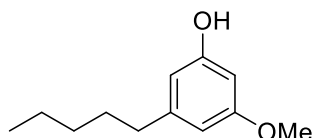

**4h**: 3-methoxy-5-pentylphenol<sup>40</sup>

**4h** was synthesized according to the **General procedure B** With **3h** (0.2 mmol, 36 mg), **Cat.1** (5.5 mg, 10 mol%),  $\text{Zn}(\text{OTf})_2$  (7.2 mg, 10 mol%), MeOH (40  $\mu\text{L}$ , 5.0 equiv.) and Hexane (0.5 mL, 0.4 M). The reaction was stirred at 150  $^\circ\text{C}$  for 24 h then quenched by adding  $\text{K}_2\text{CO}_3$  (20 mol%), filtration and then washing the solid with DCM, the combined organic phase was concentrated under reduced pressure and the residue was purified using flash column chromatography (PE/EtOAc = 10:1) on silica gel to give the desired products **4h** (32.2 mg, 83%) as a yellow oil.  $^1\text{H}$  NMR (400 MHz,  $\text{CDCl}_3$ )  $\delta$  6.32 (s, 1H), 6.26 (s, 1H), 6.23 (t,  $J$  = 2.1 Hz, 1H), 3.77 (s, 3H), 2.51 (t,  $J$  = 6.7 Hz, 2H), 1.32 – 1.25 (m, 6H), 0.89 (t,  $J$  = 6.7 Hz, 3H).  $^{13}\text{C}$  NMR (101 MHz,  $\text{CDCl}_3$ )  $\delta$  161.0, 156.6, 145.9, 108.0, 106.9, 98.8, 55.4, 36.2, 31.6, 31.0, 22.7, 14.2. The spectroscopic data were according to the literature report.

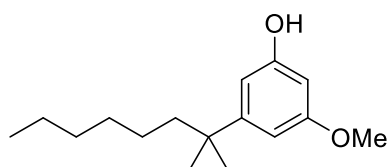

**4i**: 3-methoxy-5-(2-methyloctan-2-yl)phenol<sup>41</sup>

**4i** was synthesized according to the **General procedure B** With **3i** (0.2 mmol, 47.3 mg), **Cat.1** (5.5 mg, 10 mol%), Zn(OTf)<sub>2</sub> (7.2 mg, 10 mol%), MeOH (40  $\mu$ L, 5.0 equiv.) and Hexane (0.5 mL, 0.4 M). The reaction was stirred at 150 °C for 24 h then quenched by adding K<sub>2</sub>CO<sub>3</sub> (20 mol%), filtration and then washing the solid with DCM, the combined organic phase was concentrated under reduced pressure and the residue was purified using flash column chromatography (PE/EtOAc = 10:1) on silica gel to give the desired products **4i** (41 mg, 82%) as a yellow oil. <sup>1</sup>H NMR (600 MHz, CDCl<sub>3</sub>)  $\delta$  6.47 (s, 1H), 6.40 (s, 1H), 6.24 (t, *J* = 2.1 Hz, 1H), 3.78 (s, 3H), 1.55 – 1.52 (m, 2H), 1.23 (s, 6H), 1.21 – 1.17 (m, 6H), 1.01 – 1.01 (m, 2H), 0.84 (t, *J* = 7.1 Hz, 3H) <sup>13</sup>C NMR (101 MHz, CDCl<sub>3</sub>)  $\delta$  160.7, 156.4, 153.2, 105.8, 105.3, 98.0, 55.3, 44.6, 38.0, 31.9, 30.2, 29.0, 24.8, 22.8, 14.2. The spectroscopic data were according to the literature report.

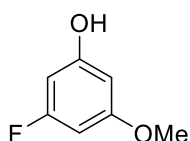

**4j**: 5-fluorobenzene-1,3-diol<sup>42</sup>

**4j** was synthesized according to the **General procedure B** With **3j** (0.2 mmol, 26 mg), **Cat.1** (5.5 mg, 10 mol%), Zn(OTf)<sub>2</sub> (7.2 mg, 10 mol%), MeOH (40  $\mu$ L, 5.0 equiv.) and Hexane (0.5 mL, 0.4 M). The reaction was stirred at 150 °C for 24 h then quenched by adding K<sub>2</sub>CO<sub>3</sub> (20 mol%), filtration and then washing the solid with DCM, the combined organic phase was concentrated under reduced pressure and the residue was purified using flash column chromatography (PE/EtOAc = 10:1) on silica gel to give the desired products **4j** (10 mg, 36%) as a colorless oil. <sup>1</sup>H NMR (600 MHz, CDCl<sub>3</sub>)  $\delta$  6.22 (dt, *J* = 10.7, 2.2 Hz, 1H), 6.19 – 6.17 (m, 2H), 3.76 (s, 3H). <sup>13</sup>C NMR (151 MHz, CDCl<sub>3</sub>)  $\delta$  165.1(d, *J* = 242 Hz), 161.8(d, *J* = 15.1 Hz), 157.6 (d, *J* = 13.6 Hz), 97.7(d, *J* = 3 Hz), 96.1(d, *J* = 25.7 Hz), 94.6(d, *J* = 25.7 Hz), 55.7. <sup>19</sup>F NMR (565 MHz, CDCl<sub>3</sub>)  $\delta$  -111.0 The spectroscopic data were according to the literature report.

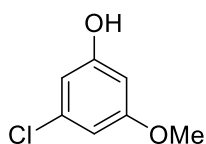

**4k**: 3-chloro-5-methoxyphenol<sup>42</sup>

**4k** was synthesized according to the **General procedure B** With **3k** (0.2 mmol, 29 mg), **Cat.1** (5.5 mg, 10 mol%), Zn(OTf)<sub>2</sub> (7.2 mg, 10 mol%), MeOH (40  $\mu$ L, 5.0 equiv.) and Hexane (0.5 mL, 0.4 M). The reaction was stirred at 150 °C for 24 h then quenched by adding K<sub>2</sub>CO<sub>3</sub> (20 mol%), filtration and then washing the solid with DCM, the combined organic phase was concentrated under reduced pressure and the residue was purified using flash column chromatography (PE/EtOAc = 10:1) on silica gel to give the desired products **4k** (26.6 mg, 84%) as a colorless oil. <sup>1</sup>H NMR (400 MHz, CDCl<sub>3</sub>)  $\delta$  6.49 (s, 1H), 6.46 (s, 1H), 6.29 (t, *J* = 2.1 Hz, 1H), 3.76 (s, 3H). <sup>13</sup>C NMR (101 MHz, CDCl<sub>3</sub>)  $\delta$  161.4, 157.2, 135.4, 108.7, 107.2, 100.5, 55.7. The spectroscopic data were according to the literature report.

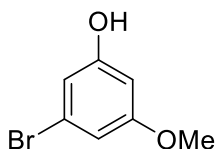

**4l**: 3-bromo-5-methoxyphenol<sup>43</sup>

**4l** was synthesized according to the **General procedure B** With **3l** (0.2 mmol, 38 mg), **Cat.1** (5.5 mg, 10 mol%), Zn(OTf)<sub>2</sub> (7.2 mg, 10 mol%), MeOH (40  $\mu$ L, 5.0 equiv.) and Hexane (0.5 mL, 0.4 M). The reaction was stirred at 150 °C for 24 h then quenched by adding K<sub>2</sub>CO<sub>3</sub> (20 mol%), filtration and then washing the solid with DCM, the combined organic phase was concentrated under reduced pressure and the residue was purified using flash column chromatography (100% petroleum ether) on silica gel to give the desired products **4l** (38.6 mg, 95%) as a yellow solid. <sup>1</sup>H NMR (600 MHz, CDCl<sub>3</sub>)  $\delta$  6.65 (s, 1H), 6.61 (s, 1H), 6.33 (t, *J* = 2.1 Hz, 1H), 3.76 (s, 3H). <sup>13</sup>C NMR (101 MHz, CDCl<sub>3</sub>)  $\delta$  161.5, 157.3, 123.1, 111.6, 110.1, 101.0, 55.7. The spectroscopic data were according to the literature report.

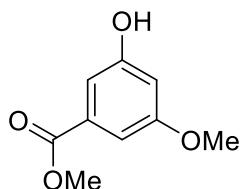

**4m**: methyl 3-hydroxy-5-methoxybenzoate<sup>43</sup>

**4m** was synthesized according to the **general procedure B** With **3m** (0.2 mmol, 34 mg), **Cat.1** (5.5 mg, 10 mol%), Zn(OTf)<sub>2</sub> (7.2 mg, 10 mol%), MeOH (40  $\mu$ L, 5.0 equiv.) and Hexane (0.5 mL, 0.4M). The reaction was stirred at 150 °C for 24 h then quenched by adding K<sub>2</sub>CO<sub>3</sub> (20 mol%), filtration and then washing the solid with DCM, the combined organic phase

was concentrated under reduced pressure and the residue was purified using flash column chromatography (PE/EtOAc = 5:1) on silica gel to give the desired products **4m** (18.2 mg, 50%) as a yellow solid.  $^1\text{H NMR}$  (400 MHz,  $\text{CDCl}_3$ )  $\delta$  7.16 – 7.14 (m, 2H), 6.62 (t,  $J$  = 2.3 Hz, 1H), 3.90 (s, 3H), 3.82 (s, 3H).  $^{13}\text{C NMR}$  (151 MHz,  $\text{CDCl}_3$ )  $\delta$  167.1, 161.0, 156.9, 132.2, 109.4, 107.2, 106.8, 55.7, 52.5. The spectroscopic data were according to the literature report.

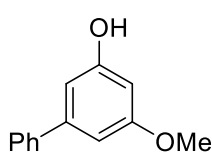

**4n**: 5-methoxy-[1,1'-biphenyl]-3-ol<sup>44</sup>

**4n** was synthesized according to the **General procedure B** With **3n** (0.2 mmol, 37 mg), **Cat.1** (5.5 mg, 10 mol%),  $\text{Zn}(\text{OTf})_2$  (7.2 mg, 10 mol%), MeOH (16  $\mu\text{L}$ , 2.0 equiv.) and Hexane (0.5 mL, 0.4 M). The reaction was stirred at 150 °C for 24 h then quenched by adding  $\text{K}_2\text{CO}_3$  (20 mol%), filtration and then washing the solid with DCM, the combined organic phase was concentrated under reduced pressure and the residue was purified using flash column chromatography (PE/EtOAc = 10:1) on silica gel to give the desired products **4n** (25.2 mg, 63%) as a colorless oil.  $^1\text{H NMR}$  (600 MHz,  $\text{CDCl}_3$ )  $\delta$  7.56 – 7.55 (m, 2H), 7.42 (t,  $J$  = 7.6 Hz, 2H), 7.35 (t,  $J$  = 7.4 Hz, 1H), 6.72 – 6.73 (m, 1H), 6.67 – 6.66 (m, 1H), 6.42 (t,  $J$  = 2.2 Hz, 1H), 3.84 (s, 3H).  $^{13}\text{C NMR}$  (101 MHz,  $\text{CDCl}_3$ )  $\delta$  161.3, 157.1, 143.9, 140.9, 128.9, 127.8, 127.2, 107.0, 105.8, 100.5, 55.6. The spectroscopic data were according to the literature report.

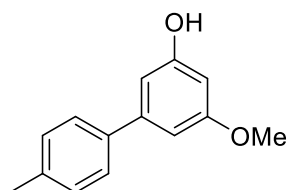

**4o**: 5-methoxy-4'-methyl-[1,1'-biphenyl]-3-ol

**4o** was synthesized according to the **General procedure B** With **3o** (0.2 mmol, 40 mg), **Cat.1** (5.5 mg, 10 mol%),  $\text{Zn}(\text{OTf})_2$  (7.2 mg, 10 mol%), MeOH (16  $\mu\text{L}$ , 2.0 equiv.) and Hexane (0.5 mL, 0.4 M). The reaction was stirred at 150 °C for 24 h then quenched by adding  $\text{K}_2\text{CO}_3$  (20 mol%), filtration and then washing the solid with DCM, the combined organic phase was concentrated under reduced pressure and the residue was purified using flash column chromatography (PE/EtOAc = 10:1) on silica gel to give the desired products **4o** (30 mg, 70%) as a colorless oil.  $^1\text{H NMR}$  (600 MHz,  $\text{CDCl}_3$ )  $\delta$  7.45 (d,  $J$  = 8.1 Hz,

2H), 7.23 (d,  $J = 8.0$  Hz, 2H), 6.71 – 6.70 (m, 1H), 6.65 – 6.64 (m, 1H), 6.39 (t,  $J = 2.2$  Hz, 1H), 3.83 (s, 3H), 2.39 (s, 3H).  **$^{13}\text{C}$  NMR** (101 MHz,  $\text{CDCl}_3$ )  $\delta$  161.3, 157.0, 143.8, 138.0, 137.6, 129.6, 127.1, 106.8, 105.6, 100.2, 55.6, 21.3. **HRMS**  $m/z$  (ESI): calcd. for  $\text{C}_{14}\text{H}_{14}\text{O}_2$   $[\text{M-H}]^-$ : 213.0921, found: 213.0924

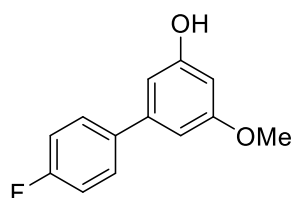

**4p**: 4'-fluoro-5-methoxy-[1,1'-biphenyl]-3-ol

**4p** was synthesized according to the **General procedure B**

With **3p** (0.2 mmol, 41 mg), **Cat.1** (5.5 mg, 10 mol%),  $\text{Zn}(\text{OTf})_2$  (7.2 mg, 10 mol%), MeOH (16  $\mu\text{L}$ , 2.0 equiv.) and Hexane (0.5 mL, 0.4 M). The reaction was stirred at 150 °C for 24 h then quenched by adding  $\text{K}_2\text{CO}_3$  (20 mol%), filtration and then washing the solid with DCM, the combined organic phase was concentrated under reduced pressure and the residue was purified using flash column chromatography (PE/EtOAc = 10:1) on silica gel to give the desired products **4p** (33.6 mg, 77%) as a colorless oil.  **$^1\text{H}$  NMR** (600 MHz,  $\text{CDCl}_3$ )  $\delta$  7.49 (m, 2H), 7.10 (t,  $J = 8.7$  Hz, 2H), 6.67 – 6.65 (m, 1H), 6.61 – 6.60 (m, 1H), 6.41 (t,  $J = 2.2$  Hz, 1H), 3.83 (s, 3H).  **$^{13}\text{C}$  NMR** (101 MHz,  $\text{CDCl}_3$ )  $\delta$  164.0(d,  $J = 247.5$  Hz), 161.4(d,  $J = 428.2$  Hz), 142.9, 137.0 (d,  $J = 3.03$  Hz), 128.8 (d,  $J = 8.1$  Hz), 115.8 (d,  $J = 21.2$  Hz), 106.9, 105.8, 100.4, 55.6. **HRMS**  $m/z$  (ESI): calcd. for  $\text{C}_{13}\text{H}_{11}\text{FO}_2$   $[\text{M-H}]^-$ : 217.0670, found: 217.0677

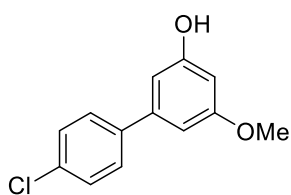

**4q**: 4'-chloro-5-methoxy-[1,1'-biphenyl]-3-ol

**4q** was synthesized according to the **General procedure B**

With **3q** (0.2 mmol, 45 mg), **Cat.1** (5.5 mg, 10 mol%),  $\text{Zn}(\text{OTf})_2$  (7.2 mg, 10 mol%), MeOH (16  $\mu\text{L}$ , 2.0 equiv.) and Hexane (0.5 mL, 0.4 M). The reaction was stirred at 150 °C for 24 h then quenched by adding  $\text{K}_2\text{CO}_3$  (20 mol%), filtration and then washing the solid with DCM, the combined organic phase was concentrated under reduced pressure and the residue was purified using flash column chromatography (PE/EtOAc = 10:1) on silica gel to give the desired products **4q** (22.1 mg, 47%) as a colorless oil.  **$^1\text{H}$  NMR** (600 MHz,  $\text{CDCl}_3$ )  $\delta$  7.48 (d,  $J = 8.5$  Hz, 2H), 7.39 (d,  $J = 8.5$  Hz, 2H), 6.66 – 6.67 (m, 1H), 6.61 – 6.62 (m, 1H), 6.41

(t,  $J = 2.2$  Hz, 1H), 3.83 (s, 3H).  **$^{13}\text{C}$  NMR** (101 MHz,  $\text{CDCl}_3$ )  $\delta$  161.4, 157.2, 142.6, 139.4, 133.8, 129.0, 128.5, 106.8, 105.8, 100.7, 55.6. **HRMS**  $m/z$  (ESI): calcd. for  $\text{C}_{13}\text{H}_{11}\text{ClO}_2$   $[\text{M}-\text{H}]^-$ : 233.0375, found: 233.0375

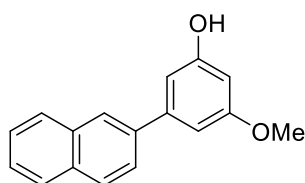

**4r**: 3-methoxy-5-(naphthalen-2-yl)phenol

**4r** was synthesized according to the **General procedure B**

With **3r** (0.2 mmol, 48 mg), **Cat.1** (5.5 mg, 10 mol%),  $\text{Zn}(\text{OTf})_2$  (7.2 mg, 10 mol%), MeOH (16  $\mu\text{L}$ , 2.0 equiv.) and Hexane (0.5 mL, 0.4M). The reaction was stirred at 150 °C for 24 h then quenched by adding  $\text{K}_2\text{CO}_3$  (20 mol%), filtration and then washing the solid with DCM, the combined organic phase was concentrated under reduced pressure and the residue was purified using flash column chromatography (PE/EtOAc = 10:1) on silica gel to give the desired products **4r** (41 mg, 82%) as a colorless oil.  **$^1\text{H}$  NMR** (600 MHz,  $\text{CDCl}_3$ )  $\delta$  8.01 (s, 1H), 7.90 – 7.86 (m, 3H), 7.71 (dd,  $J = 8.5, 1.7$  Hz, 1H), 7.52 – 7.47 (m, 2H), 6.86 – 6.85 (m, 1H), 6.80 – 6.79 (m, 1H), 6.45 (t,  $J = 2.1$  Hz, 1H), 3.87 (s, 3H).  **$^{13}\text{C}$  NMR** (101 MHz,  $\text{CDCl}_3$ )  $\delta$  161.4, 157.1, 143.8, 138.2, 133.7, 132.9, 128.5, 128.4, 127.8, 126.5, 126.2, 126.0, 125.6, 107.3, 106.1, 100.6, 55.6. **HRMS**  $m/z$  (ESI): calcd. for  $\text{C}_{17}\text{H}_{14}\text{O}_2$   $[\text{M}-\text{H}]^-$ : 249.0921, found: 249.0920

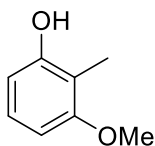

**4s**: 3-methoxy-2-methylphenol<sup>45</sup>

**4s** was synthesized according to the **General procedure B** With **3s** (0.2 mmol, 25 mg), **Cat.1** (5.5 mg, 10 mol%),  $\text{Zn}(\text{OTf})_2$  (7.2 mg, 10 mol%), MeOH (40  $\mu\text{L}$ , 5.0 equiv) and Hexane (0.5 mL, 0.4 M). The reaction was stirred at 150 °C for 24 h then quenched by adding  $\text{K}_2\text{CO}_3$  (20 mol%), filtration and then washing the solid with DCM, the combined organic phase was concentrated under reduced pressure and the residue was purified using flash column chromatography (PE/EtOAc = 10:1) on silica gel to give the desired products **4s** (12.7 mg, 46%) as a colorless oil.  **$^1\text{H}$  NMR** (600 MHz,  $\text{CDCl}_3$ )  $\delta$  7.03 (t,  $J = 8.2$  Hz, 1H), 6.47 (dd,  $J = 13.4, 8.2$  Hz, 2H), 3.82 (s, 3H), 2.12 (s, 3H).  **$^{13}\text{C}$  NMR** (101 MHz,  $\text{CDCl}_3$ )  $\delta$  158.8, 154.6, 126.6, 112.2, 108.2, 103.2, 55.8, 8.1. The spectroscopic data were according to the

literature report.

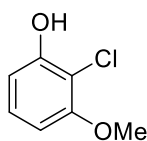

**4t**: 2-chloro-3-methoxyphenol

**4t** was synthesized according to the **General procedure B** With **3t** (0.2 mmol, 29 mg), **Cat.1** (5.5 mg, 10 mol%), Zn(OTf)<sub>2</sub> (7.2 mg, 10 mol%), MeOH (40  $\mu$ L, 5.0 equiv.) and Hexane (0.5 mL, 0.4 M). The reaction was stirred at 150 °C for 24 h then quenched by adding K<sub>2</sub>CO<sub>3</sub> (20 mol%), filtration and then washing the solid with DCM, the combined organic phase was concentrated under reduced pressure and the residue was purified using flash column chromatography (PE/EtOAc = 10:1) on silica gel to give the desired products **4t** (14 mg, 44%) as a colorless oil. **<sup>1</sup>H NMR** (600 MHz, CDCl<sub>3</sub>)  $\delta$  7.13 (t,  $J$  = 8.3 Hz, 1H), 6.68 (d,  $J$  = 9.3 Hz, 1H), 6.52 (d,  $J$  = 8.3 Hz, 1H), 3.89 (s, 3H). **<sup>13</sup>C NMR** (101 MHz, CDCl<sub>3</sub>)  $\delta$  155.7, 152.7, 127.8, 108.7, 103.9, 56.5. **HRMS**  $m/z$  (ESI): calcd. for C<sub>7</sub>H<sub>7</sub>ClO<sub>2</sub> [M-H]<sup>-</sup>: 157.0062, found: 257.0067

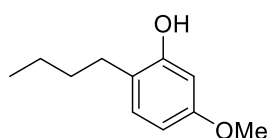

**4u**:**4u'** = 1.7:1

**4u**: 2-butyl-5-methoxyphenol

**4u** was synthesized according to the **General procedure B** With **3u** (0.2 mmol, 34 mg), **Cat.1** (5.5 mg, 10 mol%), Zn(OTf)<sub>2</sub> (7.2 mg, 10 mol%), MeOH (40  $\mu$ L, 5.0 equiv.) and Hexane (0.5 mL, 0.4 M). The reaction was stirred at 150 °C for 24 h then quenched by adding K<sub>2</sub>CO<sub>3</sub> (20 mol%), filtration and then washing the solid with DCM, the combined organic phase was concentrated under reduced pressure and the residue was purified using flash column chromatography (PE/EtOAc = 10:1) on silica gel to give the desired products **4u** (32.1 mg, 89%) as a colorless oil. **<sup>1</sup>H NMR** (400 MHz, CDCl<sub>3</sub>)  $\delta$  6.99 (d,  $J$  = 8.3 Hz, 1H), 6.44 (dd,  $J$  = 8.3, 2.5 Hz, 1H), 6.39 – 6.37 (m, 1H), 3.78 (s, 1H), 3.76 (s, 3H), 2.53 (q,  $J$  = 7.0, 6.5 Hz, 3H), 1.60 – 1.47 (m, 3H), 1.42 – 1.23 (m, 3H), 0.95 – 0.88 (t,  $J$  = 7.2 Hz, 4H). **<sup>13</sup>C NMR** (101 MHz, CDCl<sub>3</sub>)  $\delta$  159.0, 158.5, 154.8, 154.3, 130.6, 130.2, 123.7, 120.9, 106.5, 106.0, 101.8, 98.9, 55.4, 55.4, 32.4, 32.3, 29.3, 29.1, 22.7, 22.7, 14.2, 14.1. **HRMS**  $m/z$  (ESI): calcd. for C<sub>11</sub>H<sub>16</sub>O<sub>2</sub> [M-H]<sup>-</sup>: 179.1078, found: 179.1077

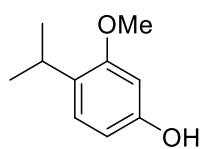

**4v**: 2-isopropyl-5-methoxyphenol<sup>46</sup>

**4v:4v'** = 1.5:1

**4v** was synthesized according to the **General procedure B** With **3v** (0.2 mmol, 30.4 mg), **Cat.1** (5.5 mg, 10 mol%), Zn(OTf)<sub>2</sub> (7.2 mg, 10 mol%), MeOH (40  $\mu$ L, 5.0 equiv) and Hexane (0.5 mL, 0.4 M).

The reaction was stirred at 150 °C for 24 h then quenched by adding K<sub>2</sub>CO<sub>3</sub> (20 mol%), filtration and then washing the solid with DCM, the combined organic phase was concentrated under reduced pressure and the residue was purified using flash column chromatography (PE/EtOAc = 10:1) on silica gel to give the desired products **4v** (27.2 mg, 82%) as a yellow oli. <sup>1</sup>H NMR (400 MHz, CDCl<sub>3</sub>)  $\delta$  7.11 (d, *J* = 8.4 Hz, 1H), 6.51 (dd, *J* = 8.5, 2.5 Hz, 1H), 6.38 (d, *J* = 2.5 Hz, 1H), 3.78 (s, 0.59H), 3.77 (s, 3H), 3.25 – 3.12 (m, 1H), 1.25 (d, *J* = 6.9 Hz, 6H), 1.20 (d, *J* = 6.9 Hz, 1H) <sup>13</sup>C NMR (151 MHz, CDCl<sub>3</sub>)  $\delta$  158.4, 157.9, 154.6, 153.7, 127.2, 127.2, 127.0, 126.6, 106.8, 106.0, 101.9, 99.1, 58.8, 55.4, 26.6, 26.3, 23.0, 22.9. The spectroscopic data were according to the literature report.

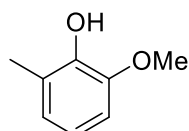

**4w**: 2-methoxy-6-methylphenol

**4w:4w'** = 3:1

**4w** was synthesized according to the **General procedure B** With **3w** (0.2 mmol, 25 mg), **Cat.1** (5.5 mg, 10 mol%), Zn(OTf)<sub>2</sub> (7.2 mg, 10 mol%), MeOH (40  $\mu$ L, 5.0 equiv.) and Hexane (0.5 mL, 0.4 M). The

reaction was stirred at 150 °C for 24 h then quenched by adding K<sub>2</sub>CO<sub>3</sub> (20 mol%), filtration and then washing the solid with DCM, the combined organic phase was concentrated under reduced pressure and the residue was purified using flash column chromatography (PE/EtOAc = 10:1) on silica gel to give the desired products **4w** (18 mg, 65%) as a colorless oil. <sup>1</sup>H NMR (600 MHz, CDCl<sub>3</sub>)  $\delta$  6.76 – 6.71 (m, 3H), 3.88 (s, 3H), 2.26 (s, 3H). <sup>13</sup>C NMR (101 MHz, CDCl<sub>3</sub>)  $\delta$  146.4, 143.9, 124.1, 123.3, 119.3, 108.4, 56.1, 15.5. **HRMS** *m/z* (ESI): calcd. for C<sub>8</sub>H<sub>10</sub>O<sub>2</sub> [M-H]<sup>-</sup>: 137.0608, found: 137.0607



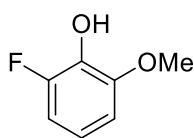

**4x:4x' =3:1**

**4x:** 2-fluoro-6-methoxyphenol<sup>47, 48</sup>

**4x** was synthesized according to the **General procedure B** With **3x** (0.2 mmol, 26 mg), **Cat.1** (16.5 mg, 10 mol%), Zn(OTf)<sub>2</sub> (21.6 mg, 10 mol%), MeOH (40  $\mu$ L, 5.0 equiv.) and Hexane (0.5 mL, 0.4 M).

The reaction was stirred at 150 °C for 24 h then quenched by adding K<sub>2</sub>CO<sub>3</sub> (20 mol%), filtration and then washing the solid with DCM, the combined organic phase was concentrated under reduced pressure and the residue was purified using flash column chromatography (PE/EtOAc = 10:1) on silica gel to give the desired products **4x** (15 mg, 49%), (67% yield by nmr) as a colorless oil. <sup>1</sup>H NMR (600 MHz, CDCl<sub>3</sub>)  $\delta$  6.80 – 6.72 (m, 2.42H), 6.68 – 6.61 (m, 1.45H), 4.0 (s, 1H), 3.91 (s, 3H). The spectroscopic data were according to the literature report.

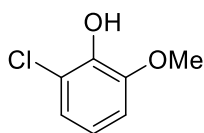

**4y:4y' =6.7:1**

**4y:** 2-chloro-6-methoxyphenol<sup>48</sup>

**4y** was synthesized according to the **General procedure B** With **3y** (0.2 mmol, 29 mg), **Cat.1** (16.5 mg, 10 mol%), Zn(OTf)<sub>2</sub> (21.6 mg, 10 mol%), MeOH (40  $\mu$ L, 5.0 equiv.) and Hexane (0.5 mL, 0.4 M).

The reaction was stirred at 150 °C for 24 h then quenched by adding K<sub>2</sub>CO<sub>3</sub> (20 mol%), filtration and then washing the solid with DCM, the combined organic phase was concentrated under reduced pressure and the residue was purified using flash column chromatography (PE/EtOAc = 10:1) on silica gel to give the desired products **4y** (20 mg, 63%) as a colorless oil. <sup>1</sup>H NMR (600 MHz, CDCl<sub>3</sub>)  $\delta$  6.98 (dd, *J* = 7.3, 2.4 Hz, 1H), 6.84 – 6.80 (m, 2H), 3.96 (s, 0.45H), 3.93 (s, 3H). The spectroscopic data were according to the literature report.

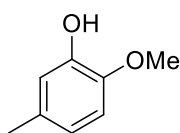

**4z:4z' =1.2:1**

**4z:** 2-methoxy-5-methylphenol<sup>49</sup>

**4z** was synthesized according to the **General procedure B** With **3z** (0.2 mmol, 25 mg), **Cat.1** (5.5 mg, 10 mol%), Zn(OTf)<sub>2</sub> (7.2 mg, 10 mol%), MeOH (40  $\mu$ L, 5.0 equiv.) and Hexane (0.5 mL, 0.4 M). The

reaction was stirred at 150 °C for 24 h then quenched by adding K<sub>2</sub>CO<sub>3</sub> (20 mol%), filtration and then washing the solid with DCM, the combined organic phase was

concentrated under reduced pressure and the residue was purified using flash column chromatography (PE/EtOAc = 10:1) on silica gel to give the desired products **4z** (20.5 mg, 74%) as a colorless oil.  $^1\text{H NMR}$  (600 MHz,  $\text{CDCl}_3$ )  $\delta$  6.81 (d,  $J$  = 7.8 Hz, 0.81H), 6.76 – 6.72 (m, 2H), 6.68 – 6.63 (m, 2.67H), 3.87 (s, 2.45H), 3.86 (s, 3H), 2.29 (s, 2.49H), 2.26 (s, 3H).  $^{13}\text{C NMR}$  (101 MHz,  $\text{CDCl}_3$ )  $\delta$  146.4, 145.5, 144.6, 143.5, 131.3, 129.8, 121.6, 120.4, 115.5, 114.2, 111.8, 110.8, 56.2, 56.0, 21.2, 20.9. The spectroscopic data were according to the literature report.

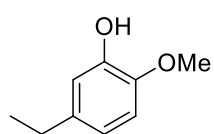

**4aa:4aa'** = 1.3:1

**4aa**: 5-ethyl-2-methoxyphenol<sup>50</sup>

**4aa** was synthesized according to the **General procedure B** With **3aa** (0.2 mmol, 28 mg), **Cat.1** (5.5 mg, 10 mol%),  $\text{Zn}(\text{OTf})_2$  (7.2 mg, 10 mol%), MeOH (40  $\mu\text{L}$ , 5.0 equiv.) and Hexane (0.5 mL, 0.4 M). The reaction was stirred at 150  $^\circ\text{C}$  for 24 h then quenched by adding  $\text{K}_2\text{CO}_3$  (20 mol%), filtration and then washing the solid with DCM, the combined organic phase was concentrated under reduced pressure and the residue was purified using flash column chromatography (PE/EtOAc = 10:1) on silica gel to give the desired products **4aa** (20.4 mg, 67%) as a colorless oil.  $^1\text{H NMR}$  (400 MHz,  $\text{CDCl}_3$ )  $\delta$  6.89– 6.84 (m, 1.15H), 6.81 – 6.77 (m, 1.65H), 6.72 – 6.67 (m, 2.58H), 3.89 (s, 3H), 3.87 (s, 2.58H), 2.63 – 2.54 (m, 3.71H), 1.25 – 1.20 (m, 5.54H).  $^{13}\text{C NMR}$  (151 MHz,  $\text{CDCl}_3$ )  $\delta$  146.5, 145.5, 144.7, 143.6, 137.8, 136.4, 120.4, 119.1, 114.3, 110.8, 110.6, 56.1, 56.0, 28.7, 28.4, 16.1, 15.9. The spectroscopic data were according to the literature report.

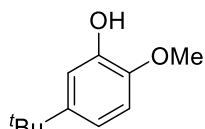

**4bb:4bb'** = 1.4:1

**4bb**: 5-(tert-butyl)-2-methoxyphenol<sup>51</sup>

**4bb** was synthesized according to the **General procedure B** With **3bb** (0.2 mmol, 34 mg), **Cat.1** (5.5 mg, 10 mol%),  $\text{Zn}(\text{OTf})_2$  (7.2 mg, 10 mol%), MeOH (40  $\mu\text{L}$ , 5.0 equiv.) and Hexane (0.5 mL, 0.4 M). The reaction was stirred at 150  $^\circ\text{C}$  for 24 h then quenched by adding  $\text{K}_2\text{CO}_3$  (20 mol%), filtration and then washing the solid with DCM, the combined organic phase was concentrated under reduced pressure and the residue was purified using flash column chromatography (PE/EtOAc = 10:1) on silica gel to give the desired products

**4bb** (17 mg, 47%) as a colorless oil. <sup>1</sup>H NMR (400 MHz, CDCl<sub>3</sub>) δ 7.00 – 6.99 (m, 0.95H), 6.90 – 6.84 (m, 3.02H), 6.80 – 6.78 (m 1H), 3.9 (s, 2.15H), 3.87 (s, 3H), 1.31 (s, 6.42H), 1.29 (s, 9H). <sup>13</sup>C NMR (101 MHz, CDCl<sub>3</sub>) δ 146.1, 145.2, 144.9, 144.4, 143.5, 143.4, 118.0, 116.6, 113.9, 112.3, 110.3, 108.4, 56.1, 56.0, 34.6, 34.4, 31.7, 31.6. The spectroscopic data were according to the literature report.

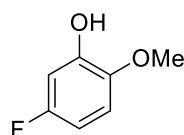

**4cc:4cc'** =2.4:1

**4cc**: 5-fluoro-2-methoxyphenol<sup>42,52</sup>

**4cc** was synthesized according to the **General procedure B** With **3cc** (0.2 mmol, 26 mg), **Cat.1** (5.5 mg, 10 mol%), Zn(OTf)<sub>2</sub> (7.2 mg, 10 mol%), MeOH (40 μL, 5.0 equiv.) and Hexane (0.5 mL, 0.4 M).

The reaction was stirred at 150 °C for 24 h then quenched by adding K<sub>2</sub>CO<sub>3</sub> (20 mol%), filtration and then washing the solid with DCM, the combined organic phase was concentrated under reduced pressure and the residue was purified using flash column chromatography (PE/EtOAc = 10:1) on silica gel to give the desired products **4cc** (14 mg, 50%), (63% yield by nmr) as a colorless oil. <sup>1</sup>H NMR (400 MHz, CDCl<sub>3</sub>) δ 6.85 – 6.82 (m, 0.45H), 6.78 – 6.74 (m, 1.04H), 6.70 – 6.66 (m, 0.97H), 6.64 – 6.51 (m, 1.93H), 3.88 (s, 1.34H), 3.87 (s, 3H). <sup>13</sup>C NMR (151 MHz, CDCl<sub>3</sub>) δ 158.5 (d, *J* = 237.1 Hz), 157.6 (d, *J* = 237.1 Hz), 147.0 (d, *J* = 10.6 Hz), 146.6 (d, *J* = 12.1 Hz), 143.1(d, *J* = 3 Hz), 141.8(d, *J* = 3 Hz), 114.4 (d, *J* = 9.1 Hz), 111.0 (d, *J* = 9.1 Hz), 107.0 (d, *J* = 22.7 Hz), 105.8 (d, *J* = 22.7 Hz), 103.0 (d, *J* = 27.2 Hz), 99.5 (d, *J* = 27.2 Hz), 56.6, 56.2. <sup>19</sup>F NMR (565 MHz, CDCl<sub>3</sub>) δ -121.3, -121.9. The procedure and spectroscopic data were according to the literature report.

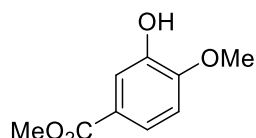

**4dd:4dd'** =1:1.7

**4dd**: methyl 3-hydroxy-4-methoxybenzoate<sup>53,54</sup>

**4dd** was synthesized according to the **General procedure B** With **3dd** (0.2 mmol, 34 mg), **Cat.1** (5.5 mg, 10 mol%), Zn(OTf)<sub>2</sub> (7.2 mg, 10 mol%), MeOH (40 μL, 5.0 equiv.) and Hexane (0.5

mL, 0.4 M). The reaction was stirred at 150 °C for 24 h then quenched by adding K<sub>2</sub>CO<sub>3</sub> (20 mol%), filtration and then washing the solid with DCM, the combined organic phase was concentrated under reduced pressure and the residue was purified using flash

column chromatography (PE/EtOAc = 5:1) on silica gel to give the desired products **4dd** (22.6 mg, 62%) as a white solid. <sup>1</sup>H NMR (600 MHz, CDCl<sub>3</sub>) δ 7.64 – 7.54 (m, 1.16H), 6.94 – 6.86 (m, 0.61H), 3.94 (s, 1.71H), 3.88 (s, 1H), 3.87 (s, 0.63H). The procedure and spectroscopic data were according to the literature report.

## 6 Synthetic applications and spectroscopic data

### 6.1 Pridopidine derivatives

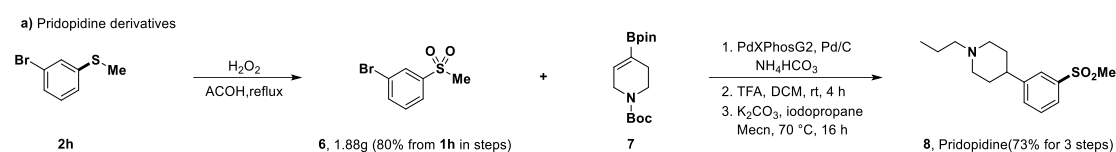

**(3-bromophenyl)(methyl)sulfane(2h):** To a 100 mL Schlenk tube was charged with **Cat.1** (276mg 10 mol%), Zn(OTf)<sub>2</sub> (360mg 10 mol%), **1h** (10 mmol, 1.0 equiv.) and an oven-dried stirring bar. The Schlenck tube was subjected to three cycles of pressurization–depressurization using dry argon. After that, under the protection of argon atmosphere, HFIP (0.4 M) and CH<sub>3</sub>OH (810 μL, 2.0 equiv.) was added and the reaction mixture was stirred at 150 °C for 24 h. The reaction was then quenched by adding K<sub>2</sub>CO<sub>3</sub> (20 mol%), filtration and then washing the solid with DCM, the combined organic phase was concentrated under reduced pressure and the residue was without purified for next step.

**1-bromo-3-(methylsulfonyl)benzene (6)**<sup>55,56</sup>: Crude product (**2h**) was placed in 100 mL Schlenk tube, acetic acid (5 mL) was added, to the stirred reaction mixture H<sub>2</sub>O<sub>2</sub> aq (5 mL, 30% v/v) was added dropwise, and reaction mixture was heated to 100 °C (oil bath). After 3 h reaction mixture was poured onto water/ice (100 mL), solid Na<sub>2</sub>CO<sub>3</sub> was added to pH = 7, mixture was extracted with ethyl acetate (3 × 20 mL), combined organic phases dried over anhydrous MgSO<sub>4</sub>. The mixture was filtered, evaporated, and The crude product was purified by silica column chromatography to afford **6** in 80% yield over 2 steps (1.88 g, white solid) The procedure and spectroscopic data were

according to the literature report.

### **Pridopidine (8)**

#### **Steps1: tert-butyl 4-(3-(methylsulfonyl)phenyl)piperidine-1-carboxylate (8-S1)<sup>57</sup>**

To an oven dried 10 mL Schlenk tube was added boronic ester (155mg, 0.5 mmol, 1 equiv.), PdXPhosG<sub>2</sub> (4 mg, 0.005 mmol, 0.01 equiv.), 10% Pd/C (64 mg, 0.08 mmol, 0.12 equiv.), K<sub>3</sub>PO<sub>4</sub> (318 mg, 0.15 mmol, 3 equiv.) and **6** (118mg, 0.5 mmol, 1 equiv.). The tube was capped and purged, then 1,4-dioxane (1.6 mL) and water (400 µL) were added. The reaction mixture was stirred at 80 °C for 4 h, followed by the addition of NH<sub>4</sub>HCO<sub>2</sub> in MeOH (1.25 M) (316 mg NH<sub>4</sub>HCO<sub>2</sub> in 4 mL MeOH). After this, the reaction was stirred for 16 h at room temperature, and the reaction mixture was diluted with ethyl acetate, filtered through Celite and rinsed through with further ethyl acetate. The solvent was removed in vacuo and the crude product was purified by silica column chromatography to afford **8-S1** in 90% yield (152 mg, yellow oil). The procedure and spectroscopic data were according to the literature report.

#### **Steps2: 4-(3-(methylsulfonyl)phenyl)piperidine TFA-salt (8-S2)**

In a 10 mL Schlenk tube tert-butyl 4-(3-(methylsulfonyl)phenyl)piperidine-1-carboxylate (**8-S1**) (0.168 mmol, 1.0 equiv) were dissolved in 1 mL DCM/TFA (9:1). The mixture was stirred for 1 h. Afterwards the solvent was removed under reduced pressure, the residue was dissolved in fluorobenzene and the solvent was again removed under reduced pressure. The crude product (**8-S2**) was without purified for next step.

#### **Steps3: 4-(3-(Methylsulfonyl)phenyl)-1-propylpiperidine / Pridopidine (8)<sup>58</sup>**

Crude 4-(3-(methylsulfonyl)phenyl)piperidine TFA-salt was dissolved in 1 mL acetonitrile and 70 mg K<sub>2</sub>CO<sub>3</sub> (0.5 mmol, 3.0 equiv) and 34 mg 1-iodopropane (0.2 mmol, 1.2 equiv) were added. The reaction mixture was stirred at rt overnight. The mixture was quenched by the addition of water and then extracted with ethyl acetate. The combined organic phases were dried over Na<sub>2</sub>SO<sub>4</sub>. After filtration the solvent was

removed under reduced pressure. The crude product was purified by silica column chromatography to afford **8** in 81% yield over 2 steps (38.3 mg, yellow oil). <sup>1</sup>H NMR (600 MHz, CDCl<sub>3</sub>) δ 7.81 (s, 1H), 7.76 (d, *J* = 7.4 Hz, 1H), 7.53 – 7.48 (m, 2H), 3.08 – 3.06 (m, 2H), 3.04 (s, 3H), 2.61 (td, *J* = 11.5, 5.4 Hz, 1H), 2.34 (dt, *J* = 8.6, 4.1 Hz, 2H), 2.04 (dt, *J* = 11.8, 6.0 Hz, 2H), 1.87 – 1.78 (m, 4H), 1.57 – 1.51 (m, 2H), 0.92 (td, *J* = 7.5, 2.7 Hz, 3H). <sup>13</sup>C NMR (101 MHz, CDCl<sub>3</sub>) δ 148.4, 140.7, 132.2, 129.5, 125.9, 125.1, 61.1, 54.2, 44.6, 42.7, 33.4, 20.3, 12.1. The procedure and spectroscopic data were according to the literature report.

## 6.2 HIV virus inhibitor analogs

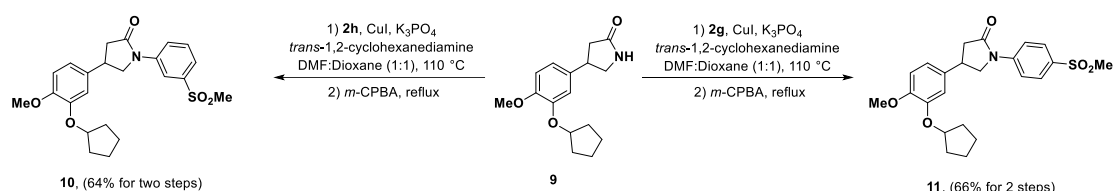

### 4-(3-(cyclopentyloxy)-4-methoxyphenyl)-1-(3-(methylsulfonyl)phenyl)pyrrolidin-2-one(10)

**Steps1:** 4-(3-(cyclopentyloxy)-4-methoxyphenyl)-1-(3-(methylthio)phenyl)pyrrolidin-2-one (10-S1)

A mixture of 4-(3-(cyclopentyloxy)-4-methoxy-phenyl)-pyrrolidin-2-one (276 mg, 1 mmol), (3-bromophenyl)(methyl)sulfane(**2h**) (283mg, 1.4 mmol), K<sub>3</sub>PO<sub>4</sub> (318 mg, 1.5 mmol), DMF (3.0 mL), dioxane (3.0 mL) and 1,2-*trans*-cyclohexanediamine (25 μL) was stirred under N<sub>2</sub> for 5 min before CuI (35 mg) was added. The reaction mixture was heated at 110 °C for 20 h under N<sub>2</sub> with stirring, then cooled down to rt The mixture was diluted with EtOAc, washed with saturated NH<sub>4</sub>Cl (3x10 mL) and dried over Na<sub>2</sub>SO<sub>4</sub> The crude product was purified by silica column chromatography to afford **10-S1** in 75% yield (298.1 mg, yellow oil).

**Steps2:** 4-(3-(cyclopentyloxy)-4-methoxyphenyl)-1-(3-(methylsulfonyl)phenyl)pyrrolidin-2-one(**10**)<sup>59</sup>

**10-S1** (398 mg, 1 mmol) in CH<sub>2</sub>Cl<sub>2</sub> was cooled by an ice water bath, *m*-CPBA (379 mg,

2.2 mmol) was added and the reaction mixture was stirred for 3 h at rt. The reaction was quenched with 10% Na<sub>2</sub>S<sub>2</sub>O<sub>3</sub> and the mixture was extracted with EtOAc. The organic layer was washed with sat. NaHCO<sub>3</sub> and dried over Na<sub>2</sub>SO<sub>4</sub>. The crude product was purified by silica column chromatography to afford **10** in 85% yield (365 mg, yellow solid). The procedure and spectroscopic data were according to the literature report.

**<sup>1</sup>H NMR** (600 MHz, CDCl<sub>3</sub>) δ 8.14 (ddd, *J* = 8.3, 2.3, 1.1 Hz, 1H), 8.04 (t, *J* = 2.0 Hz, 1H), 7.71 (ddd, *J* = 7.8, 1.8, 1.0 Hz, 1H), 7.58 (t, *J* = 8.0 Hz, 1H), 6.85 (d, *J* = 8.1 Hz, 1H), 6.82 – 6.79 (m, 2H), 4.78 (tt, *J* = 6.0, 3.4 Hz, 1H), 4.22 (dd, *J* = 9.4, 8.0 Hz, 1H), 3.90 – 3.88 (m, 1H), 3.84 (s, 3H), 3.67 (p, *J* = 8.3 Hz, 1H), 3.07 (s, 3H), 3.02 (dd, *J* = 17.1, 8.7 Hz, 1H), 2.82 (dd, *J* = 17.1, 9.0 Hz, 1H), 1.94 – 1.81 (m, 6H), 1.64 – 1.59 (m, 2H). **<sup>13</sup>C NMR** (151 MHz, CDCl<sub>3</sub>) δ 173.6, 149.5, 148.1, 141.2, 140.2, 133.4, 133.3, 130.1, 124.8, 124.8, 122.8, 122.8, 118.8, 117.7, 113.8, 112.4, 80.7, 56.2, 55.7, 44.4, 40.3, 36.7, 32.9, 32.9, 24.1. The procedure and spectroscopic data were according to the literature report.

#### **4-(3-(cyclopentyloxy)-4-methoxyphenyl)-1-(4-(methylsulfonyl)phenyl)pyrrolidin-2-one (11)**

##### **Steps1: 4-(3-(cyclopentyloxy)-4-methoxyphenyl)-1-(4-(methylthio)phenyl)pyrrolidin-2-one (11-S1)**

A mixture of 4-(3-cyclopentyloxy-4-methoxy-phenyl)-pyrrolidin-2-one (276 mg, 1 mmol), (4-bromophenyl)(methyl)sulfane (**2g**) (283mg, 1.4 mmol), K<sub>3</sub>PO<sub>4</sub> (318 mg, 1.5 mmol), DMF (3.0 mL), dioxane (3.0 mL) and 1,2-*trans*-cyclohexanediamine (25 μL) was stirred under N<sub>2</sub> for 5 min before CuI (35 mg) was added. The reaction mixture was heated at 110 °C for 20 h under N<sub>2</sub> with stirring, then cooled down to rt. The mixture was diluted with EtOAc, washed with saturated NH<sub>4</sub>Cl (3x10 mL) and dried over Na<sub>2</sub>SO<sub>4</sub>. The crude product was purified by silica column chromatography to afford **11-S1** in 80% yield (318 mg, yellow oil).

##### **Steps2: 4-(3-(cyclopentyloxy)-4-methoxyphenyl)-1-(4-(methylsulfonyl)phenyl)pyrrolidin-2-one (11)<sup>59</sup>**

**11-S1** (398 mg, 1 mmol) in CH<sub>2</sub>Cl<sub>2</sub> was cooled by an ice water bath, *m*-CPBA (379 mg,

2.2 mmol) was added and the reaction mixture was stirred for 3 h at rt. The reaction was quenched with 10% Na<sub>2</sub>S<sub>2</sub>O<sub>3</sub> and the mixture was extracted with EtOAc. The organic layer was washed with sat. NaHCO<sub>3</sub> and dried over Na<sub>2</sub>SO<sub>4</sub>. The crude product was purified by silica column chromatography to afford **11** in 83% yield (356 mg, yellow solid). The procedure and spectroscopic data were according to the literature report.

**<sup>1</sup>H NMR** (400 MHz, CDCl<sub>3</sub>) δ 7.96 – 7.92 (m, 2H), 7.87 – 7.85 (m, 2H), 6.86 – 6.78 (m, 3H), 4.77 (tt, *J* = 5.7, 3.4 Hz, 1H), 4.21 (dd, *J* = 9.5, 8.0 Hz, 1H), 3.89 – 3.87 (m, 1H), 3.84 (s, 3H), 3.67 (p, *J* = 8.4 Hz, 1H), 3.07 – 3.00 (m, 4H), 2.83 (dd, *J* = 17.2, 9.1 Hz, 1H), 1.95 – 1.80 (m, 6H), 1.65 – 1.56 (m, 2H). **<sup>13</sup>C NMR** (101 MHz, CDCl<sub>3</sub>) δ 173.9, 149.7, 148.2, 143.9, 135.6, 133.3, 128.6, 119.5, 118.9, 113.9, 112.5, 80.8, 56.3, 55.7, 44.8, 40.6, 36.8, 33.0, 32.9, 24.1. The procedure and spectroscopic data were according to the literature report.

### 6.3 Derivatization of **2g**

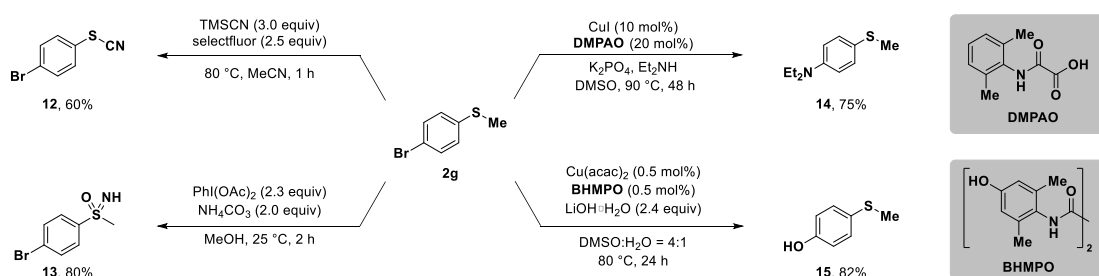

#### 1-bromo-4-thiocyanatobenzene (**12**)<sup>60</sup>

To a reaction tube were sequentially added (4-bromophenyl)(methyl)sulfide **2g** (0.2 mmol), TMSCN (74 μL, 0.6 mmol, 3 equiv), Selectfluor reagent (177 mg, 0.5 mmol, 2.5 equiv). The tube was evacuated and backfilled with nitrogen for three times. Then, 1 mL of dry acetonitrile was added via a syringe, and the resulting solution was stirred at 80 °C (oil bath). When the reaction was completed (monitored by TLC), the solvent was removed by distillation under reduced pressure. The crude product was purified by silica column chromatography to afford **12** in 60% yield (25.7 mg, white solid). **<sup>1</sup>H NMR** (600 MHz, CDCl<sub>3</sub>) δ 7.58 – 7.57 (m, 2H), 7.41 – 7.40 (m, 2H). The procedure and spectroscopic data were according to the literature report.



#### **(4-bromophenyl)(imino)(methyl)-l6-sulfanone (13)<sup>61</sup>**

Under an ambient atmosphere, to a stirred solution of (4-bromophenyl)(methyl)sulfide (**2g**) (203 mg, 1.00 mmol, 1.00 equiv) in MeOH (10.0 mL, 0.10 M) was added (NH<sub>4</sub>)<sub>2</sub>CO<sub>3</sub> (192 mg, 2.00 mmol, 2.00 equiv.). Subsequently, PhI(OAc)<sub>2</sub> (741 mg, 2.30 mmol, 2.30 equiv.) was added, then the reaction mixture was stirred at 25 °C for 2 h. The solvent was removed under reduced pressure, The crude product was purified by silica column chromatography to afford **13** in 80% yield (187 mg, colorless solid) <sup>1</sup>H NMR (400 MHz, CDCl<sub>3</sub>) δ 7.86 (d, *J* = 8.5 Hz, 2H), 7.67 (d, *J* = 8.5 Hz, 2H), 3.10 (s, 3H), 2.05 (s, 1H). The procedure and spectroscopic data were according to the literature report.

#### ***N,N*-diethyl-4-(methylthio)aniline (14)<sup>62</sup>**

An oven-dried Schlenk tube was charged with CuI (19 mg, 0.1 mmol), DMPAO (38 mg, 0.2 mmol), (4-bromophenyl)(methyl)sulfide (**2g**) (1 mmol), K<sub>3</sub>PO<sub>4</sub> (2 mmol). The tube was evacuated and backfilled with argon, and then amine (1.5 mmol) and DMSO (1 mL) was added. The reaction mixture was stirred at 90 °C for 48 h. After aryl halide was consumed, water was added and the mixture was extracted with ethyl acetate. The organic layer was dried over Na<sub>2</sub>SO<sub>4</sub> and evaporated. The residue was purified by chromatography to give the desired product. The crude product was purified by silica column chromatography to afford **14** in 75% yield (146 mg, colorless solid) <sup>1</sup>H NMR (400 MHz, CDCl<sub>3</sub>) δ 7.26 (d, *J* = 6.6 Hz, 2H), 6.61 (d, *J* = 6.6 Hz, 2H), 3.32 (q, *J* = 5.4 Hz, 4H), 2.40 (s, 3H), 1.14 (t, *J* = 5.4 Hz, 6H), <sup>13</sup>C NMR (101 MHz, CDCl<sub>3</sub>) δ 146.9, 132.2, 121.8, 112.4, 44.5, 19.7, 12.6 The procedure and spectroscopic data were according to the literature report.

#### **4-(methylthio)phenol (15)<sup>42</sup>**

The (4-bromophenyl)(methyl)sulfide (**2g**) (4.0 mmol), Cu(acac)<sub>2</sub> (0.02 mmol, 5.3 mg), LiOH·H<sub>2</sub>O (8.4 mmol, 352 mg) and BHMPO (0.02 mmol, 6.6 mg) were placed into a Schlenk tube (25 mL) with a magnetic stir bar. The reaction vessel was evacuated and backfilled with argon three times, then DMSO (3.2 mL) and degassed water (0.8 mL)

were added under a positive argon pressure (Note: for liquid substrates, they were added after the tube was backfilled with argon). The reaction mixture was heated at 80 °C for 24 h under vigorous stirring. The cooled solution was acidified with 2 N HCl, then diluted with ethyl acetate and washed with brine. The organic phase was dried over Na<sub>2</sub>SO<sub>4</sub> and and evaporated. The crude product was purified by silica column chromatography to afford **15** in 82% yield (460 mg, colorless oil). <sup>1</sup>H NMR (600 MHz, CDCl<sub>3</sub>) δ 7.23 (d, *J* = 8.2 Hz, 2H), 6.79 (d, *J* = 8.2 Hz, 2H), 2.44 (s, 3H). <sup>13</sup>C NMR (101 MHz, CDCl<sub>3</sub>) δ 154.2, 130.6, 129.1, 116.2, 18.2. The spectroscopic data were according to the literature report.

#### 6.4 Ethylation with ethanol

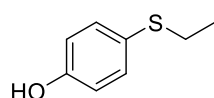

**2y'**: 4-(ethylthio)phenol<sup>63</sup>

**2y'** was synthesized according to the **General procedure B** With **1y** (2 mmol, 252 mg), **Cat.1** (55 mg, 10 mol%), Zn(OTf)<sub>2</sub> (72 mg, 10 mol%), EtOH (584 μL, 5.0 equiv.) and Hexane (5 mL, 0.4 M). The reaction was stirred at 150 °C for 24 h then quenched by adding K<sub>2</sub>CO<sub>3</sub> (20 mol%), filtration and then wash the solid with DCM, the combined organic phase was concentrated under reduced pressure and the residue was purified using flash column chromatography (PE/DCM = 3:1) on silica gel to give the desired products **2y'** (281 mg, 91%) as a white solid. <sup>1</sup>H NMR (600 MHz, CDCl<sub>3</sub>) δ 7.29 (d, *J* = 8.6 Hz, 2H), 6.78 (d, *J* = 8.6 Hz, 2H), 2.84 (q, *J* = 7.3 Hz, 2H), 1.24 (t, *J* = 7.3 Hz, 3H). <sup>13</sup>C NMR (101 MHz, CDCl<sub>3</sub>) δ 155.0, 133.5, 126.9, 116.1, 30.0, 14.8. The spectroscopic data were according to the literature report.

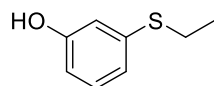

**2z'**: 3-(ethylthio)phenol<sup>64</sup>

**2z'** was synthesized according to the **General procedure B** With **1z** (2 mmol, 252 mg), **Cat.1** (55 mg, 10 mol%), Zn(OTf)<sub>2</sub> (72 mg, 10 mol%), EtOH (584 μL, 5.0 equiv.) and Hexane (5 mL, 0.4 M). The reaction was stirred at 150 °C for 24 h then quenched by adding K<sub>2</sub>CO<sub>3</sub> (20 mol%), filtration and then wash the solid with DCM, the combined organic phase was concentrated under reduced pressure and the residue was purified using flash column chromatography (PE/DCM = 3:1) on silica gel

to give the desired products **2z'** (256 mg, 82%) as a colorless oil. **<sup>1</sup>H NMR** (600 MHz, CDCl<sub>3</sub>) δ 7.14 (t, *J* = 7.9 Hz, 1H), 6.88 (d, *J* = 7.8 Hz, 1H), 6.81 – 6.80 (m, 1H), 6.63 (dd, *J* = 8.1, 2.1 Hz, 1H), 2.92 (q, *J* = 7.3 Hz, 2H), 1.33 (t, *J* = 7.4 Hz, 3H). **<sup>13</sup>C NMR** (101 MHz, CDCl<sub>3</sub>) δ 155.9, 138.5, 130.0, 121.1, 115.4, 113.0, 27.4, 14.4. The spectroscopic data were according to the literature report.

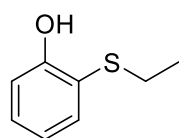

**2aa'**: 2-( ethylthio)phenol<sup>65</sup>

**2aa'** was synthesized according to the **General procedure B** With **1aa** (2 mmol, 252 mg), **Cat.1** (55 mg, 10 mol%), Zn(OTf)<sub>2</sub> (72 mg, 10 mol%), EtOH (584 μL, 5.0 equiv.) and Hexane (5 mL, 0.4 M). The reaction was stirred at 150 °C for 24 h then quenched by adding K<sub>2</sub>CO<sub>3</sub> (20 mol%), filtration and then wash the solid with DCM, the combined organic phase was concentrated under reduced pressure and the residue was purified using flash column chromatography on silica gel to give the desired products **2aa'** (271mg, 88%) as a colorless oil. **<sup>1</sup>H NMR** (600 MHz, CDCl<sub>3</sub>) δ 7.48 (d, *J* = 7.7 Hz, 1H), 7.27 (t, *J* = 7.1 Hz, 1H), 7.01 (d, *J* = 8.1 Hz, 1H), 6.88 (t, *J* = 7.5 Hz, 1H), 2.73 (q, *J* = 7.3 Hz, 2H), 1.23 (t, *J* = 7.3 Hz, 3H). **<sup>13</sup>C NMR** (101 MHz, CDCl<sub>3</sub>) δ 157.2, 136.2, 131.2, 120.8, 118.8, 114.8, 30.9, 15.0. The spectroscopic data were according to the literature report.

## 6.5 Synthetic applications of monomethylation of benzene diols

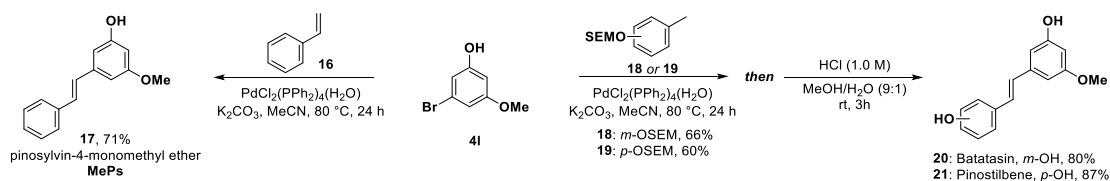

### PdCl<sub>2</sub>(PPh<sub>2</sub>)<sub>4</sub>(H<sub>2</sub>O)

A soln of Ph<sub>2</sub>PCl (0.375 mL, 2.025 mmol) in THF (2.5 mL) was added dropwise with stirring to a Schlenk flask containing a soln of [PdCl<sub>2</sub>(PhCN)<sub>2</sub>] (0.38 g, 1.0 mmol) in THF (5 mL) at rt. When the complete formation of the dichlorophosphane complex had been confirmed by <sup>31</sup>P NMR spectroscopy (δ = 87 ppm), H<sub>2</sub>O (0.25 mL) was added to the mixture and it was stirred at r.t. After 48 h, <sup>31</sup>P NMR analysis of an aliquot

exclusively showed one signal at ( $\delta$  = 78.4 ppm). The solvent was removed under vacuum to give the complex **1** (0.5 g, 92%) as a yellow crystalline powder;  $^{31}\text{P}$  NMR (121.4 MHz,  $\text{CDCl}_3$ ): 78.4. The spectroscopic data were according to the literature report.

#### **Pinosylvins-4-monomethyl ether (**17**)**<sup>66</sup>

3-bromo-5-methoxyphenol (**4I**) (1 mmol), styrene (1.0 mmol),  $\text{K}_2\text{CO}_3$  (2 mmol), and  $\text{PdCl}_2(\text{PPh}_2)_4(\text{H}_2\text{O})$  (1 mol%) in MeCN (3 mL) was heated at 110 °C (oil bath) equipped with a condenser system for 12 h. When the reaction was complete, the mixture was cooled to rt., diluted with EtOAc (15 mL), washed with brine dried ( $\text{Na}_2\text{SO}_4$ ), and concentrated under vacuum. The residue was purified using flash column chromatography on silica gel to give the desired products **17** (161mg, 71%) as a colorless oil.  $^1\text{H}$  NMR (600 MHz,  $\text{CDCl}_3$ )  $\delta$  7.50 (d,  $J$  = 7.8 Hz, 2H), 7.36 (t,  $J$  = 7.5 Hz, 2H), 7.28 – 7.26 (m, 1H), 7.08 – 6.99 (m, 2H), 6.64 (d,  $J$  = 26.7 Hz, 2H), 6.36 (s, 1H), 3.82 (s, 3H). The spectroscopic data were according to the literature report.

#### **General method for prepare 18 and 19**

*N,N*-Diisopropylethylamine (16.65 mmol, 1.5 equiv) and 2-(trimethylsilyl)ethoxymethyl chloride (SEMCl) (13.32 mmol, 1.2 equiv) were added sequentially to a solution of compound Hydroxystyrene (11.1 mmol, 1.0 equiv) in anhydrous dichloromethane (30 mL) at room temperature. After stirring at room temperature for 16 hours, saturated sodium bicarbonate (50 mL) was added to quench the reaction. The layers were separated and the aqueous layer was extracted with dichloromethane. The combined organic layers were dried over sodium sulfate, filtered and concentrated under reduced pressure. The residue was purified using flash column chromatography on silica gel to give the desired products.

#### **(E)-3-(3-hydroxystyryl)-5-methoxyphenol / Thunalbene (**20**)**<sup>67</sup>

#### **(E)-3-methoxy-5-(3-((2-(trimethylsilyl)ethoxy)methoxy)styryl)phenol (**20-S1**)**

3-bromo-5-methoxyphenol (**4I**) (1 mmol), styrene **18** (1.0 mmol), K<sub>2</sub>CO<sub>3</sub> (2 mmol), and PdCl<sub>2</sub>(PPh<sub>2</sub>)<sub>4</sub>(H<sub>2</sub>O) (1 mol%) in MeCN (3 mL) was heated at 80 °C (oil bath) equipped with a condenser system for 12 h. When the reaction was complete, the mixture was cooled to r.t, diluted with EtOAc (15 mL), washed with brine dried (Na<sub>2</sub>SO<sub>4</sub>), and concentrated under vacuum. The residue was purified using flash column chromatography on silica gel to give the desired products **20-S1** (246mg, 66%).

To a solution of HCl (1 mL) in MeOH (9 mL) was added to the **20-S1** (1.0 mmol) at room temperature, When the reaction was complete, diluted with EtOAc (15 mL), washed with NaHCO<sub>3</sub>, and concentrated under vacuum. The residue was purified using flash column chromatography on silica gel to give the desired products **20** (194mg, 80%). <sup>1</sup>H NMR (600 MHz, CDCl<sub>3</sub>) δ 7.22 (t, *J* = 7.9 Hz, 1H), 7.07 (d, *J* = 7.7 Hz, 1H), 6.98 (d, *J* = 6.9 Hz, 3H), 6.75 (dd, *J* = 8.0, 1.9 Hz, 1H), 6.63 (s, 1H), 6.63 – 6.59 (m, 1H), 6.34 (d, *J* = 2.2 Hz, 1H), 5.0 (s, 2H), 3.82 (s, 3H). <sup>13</sup>C NMR (101 MHz, CDCl<sub>3</sub>) δ 161.3, 157.0, 156.0, 139.7, 139.0, 130.0, 129.1, 128.9, 119.7, 115.0, 113.2, 106.1, 105.2, 101.2, 55.5. The spectroscopic data were according to the literature report.

#### **(E)-3-(4-hydroxystyryl)-5-methoxyphenol / Pinostilbene (**21**)**<sup>68</sup>

##### **(E)-3-methoxy-5-(4-((2-(trimethylsilyl)ethoxy)methoxy)styryl)phenol (**21-S1**)**

3-bromo-5-methoxyphenol (**4I**) (1 mmol), styrene **19** (1.0 mmol), K<sub>2</sub>CO<sub>3</sub> (2 mmol), and PdCl<sub>2</sub>(PPh<sub>2</sub>)<sub>4</sub>(H<sub>2</sub>O) (1 mol%) in MeCN (3 mL) was heated at 80 °C (oil bath) equipped with a condenser system for 12 h. When the reaction was complete, the mixture was cooled to rt., diluted with EtOAc (15 mL), washed with brine dried (Na<sub>2</sub>SO<sub>4</sub>), and concentrated under vacuum. The residue was purified using flash column chromatography (PE/EtOAc = 10:1) on silica gel to give the desired products **21-S1** (224mg, 60%).

To a solution of HCl (1 mL) in MeOH (1 mL) was added to the **21-S1** (1.0 mmol) at room temperature, When the reaction was complete, diluted with EtOAc (15 mL), washed with NaHCO<sub>3</sub>, and concentrated under vacuum. The residue was purified using flash column chromatography on silica gel to give the desired products **20**

(211mg, 87%).  $^1\text{H NMR}$  (600 MHz,  $\text{CD}_3\text{OD}$ )  $\delta$  7.38 (d,  $J$  = 8.5 Hz, 2H), 7.02 (d,  $J$  = 16.3 Hz, 1H), 6.86 (d,  $J$  = 16.3 Hz, 1H), 6.79 (d,  $J$  = 8.5 Hz, 2H), 6.63 – 6.52 (m, 2H), 6.33 – 6.22 (m, 1H), 3.79 (s, 3H).  $^{13}\text{C NMR}$  (151 MHz,  $\text{CD}_3\text{OD}$ )  $\delta$  161.1, 158.3, 157.0, 139.9, 129.0, 128.3, 127.5, 125.5, 115.1, 105.3, 103.0, 100.0, 54.3, 48.0, 47.9, 47.8, 47.6, 47.5, 47.3, 47.2. The spectroscopic data were according to the literature report.

## 7 Mechanistic experiments

### 7.1 Possibility of TfOH formation that leads to catalysis

a) possibility of TfOH formation that leads to catalysis

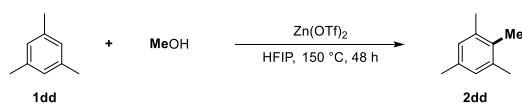

#### catalyst loading

10%  $\text{Zn}(\text{OTf})_2$ : NR  
 20%  $\text{Zn}(\text{OTf})_2$ : NR  
 30%  $\text{Zn}(\text{OTf})_2$ : NR  
 40%  $\text{Zn}(\text{OTf})_2$ : NR  
 50%  $\text{Zn}(\text{OTf})_2$ : NR

#### test of adventitious $\text{H}_2\text{O}$

10%  $\text{Zn}(\text{OTf})_2$  +  $\text{H}_2\text{O}$ (10 $\mu\text{L}$ ): NR  
 20%  $\text{Zn}(\text{OTf})_2$  +  $\text{H}_2\text{O}$ (10 $\mu\text{L}$ ): NR  
 30%  $\text{Zn}(\text{OTf})_2$  +  $\text{H}_2\text{O}$ (10 $\mu\text{L}$ ): NR  
 40%  $\text{Zn}(\text{OTf})_2$  +  $\text{H}_2\text{O}$ (10 $\mu\text{L}$ ): NR  
 50%  $\text{Zn}(\text{OTf})_2$  +  $\text{H}_2\text{O}$ (10 $\mu\text{L}$ ): NR

#### Catalyst loading:

To a 10 mL Schlenk tube was charged with  $\text{Zn}(\text{OTf})_2$  (from 10 mol% to 50%), Mesitylene (**1dd**) (1 mmol, 5.0 equiv.) HFIP (0.5 mL, 0.4 M), MeOH (8 $\mu\text{L}$ , 1.0 equiv.) and an oven-dried stirring bar. the reaction mixture was stirred at 150 °C for 48 h, The reaction was then quenched by adding  $\text{K}_2\text{CO}_3$  (10 mol%), dodecane as an internal standard was added and take sample 1-2 drops to check yield by GC.

#### Test of adventitious $\text{H}_2\text{O}$

To a 10 mL Schlenk tube was charged with  $\text{Zn}(\text{OTf})_2$  (from 10 mol% to 50%), Mesitylene (**1dd**) (1 mmol, 5.0 equiv.) HFIP (0.5 mL, 0.4 M), MeOH (8 $\mu\text{L}$ , 1.0 equiv.),  $\text{H}_2\text{O}$  (10 $\mu\text{L}$ ) and an oven-dried stirring bar. the reaction mixture was stirred at 150 °C for 48h, The reaction was then quenched by adding  $\text{K}_2\text{CO}_3$  (10 mol%), dodecane as an internal standard was added and take sample 1-2 drops to check yield by GC.

### 7.2 Possibility of methyl sulfonates as a key intermediate

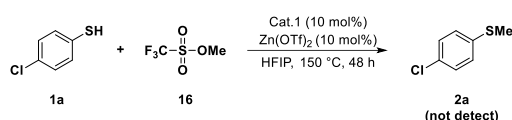

To a 10 mL Schlenk tube was charged with **Cat.1** (5.5 mg 10%),  $\text{Zn(OTf)}_2$  (7.2 mg, 10 mol%), 4-Chlorothiophenol (**1a**) (0.2 mmol, 1.0 equiv.) and an oven-dried stirring bar. The Schlenck tube was subjected to three cycles of pressurization–depressurization using dry argon. After that, under the protection of argon atmosphere, HFIP (0.5 mL, 0.4 M), Methyl trifluoromethanesulfonate (**16**) (45  $\mu\text{L}$ , 2.0 equiv.) was added and the reaction mixture was stirred at 150  $^\circ\text{C}$ . The reaction was then quenched by adding  $\text{K}_2\text{CO}_3$  (20 mol%),  $\text{CH}_2\text{Br}_2$  (7  $\mu\text{L}$ ) was added as an internal standard. The composition of mixture was analyzed by  $^1\text{H}$  NMR.

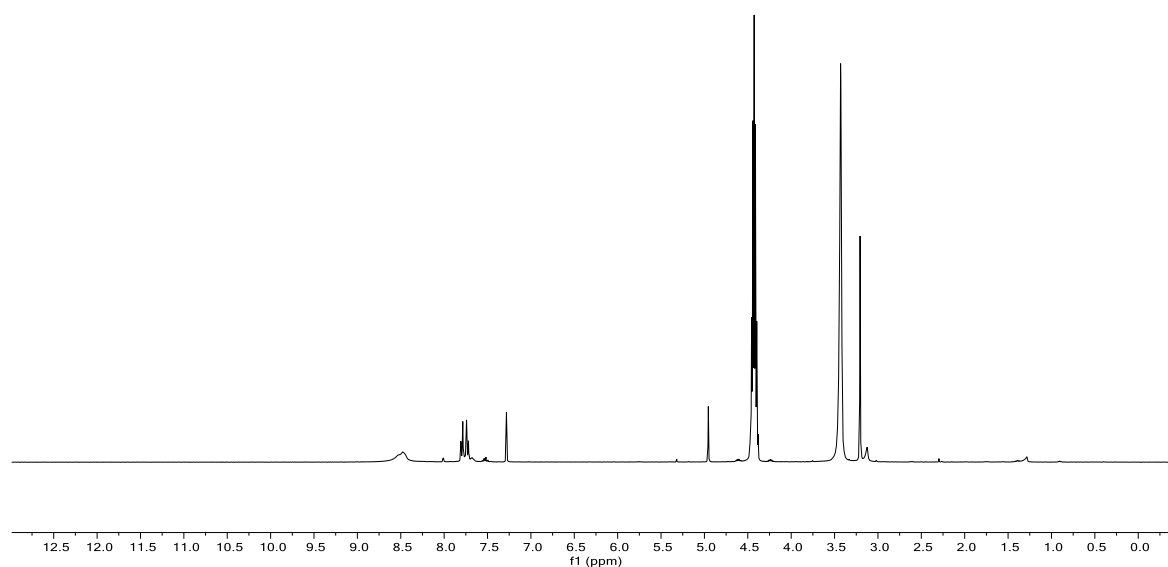

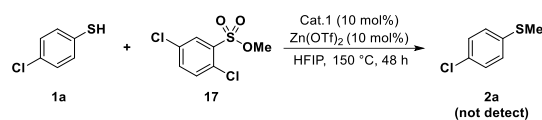

To a 10 mL Schlenk tube was charged with **Cat.1** (5.5 mg 10%),  $\text{Zn}(\text{OTf})_2$  (7.2 mg, 10 mol%), 4-Chlorothiophenol (**1a**) (0.2 mmol, 1.0 equiv.) methyl 2,5-dichlorobenzenesulfonate (**17**) (90 mg, 2.0 equiv.) and an oven-dried stirring bar. The Schlenck tube was subjected to three cycles of pressurization–depressurization using dry argon. After that, under the protection of argon atmosphere, HFIP (0.5 mL, 0.4 M), was added and the reaction mixture was stirred at 150 °C, The reaction was then quenched by adding  $\text{K}_2\text{CO}_3$  (20 mol%),  $\text{CH}_2\text{Br}_2$  (7  $\mu\text{L}$ ) was added as an internal standard, The composition of mixture was analyzed by  $^1\text{H}$  NMR.

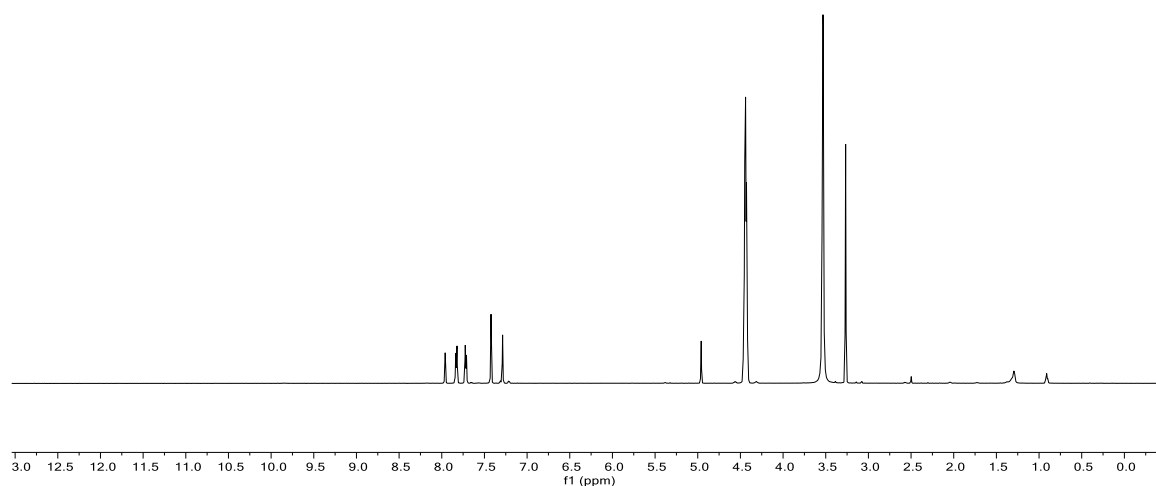



## 7.3 Kinetic Studies in HFIP

### A: Kinetic Order in Cat.1 in HFIP

The order in **Cat.1** was determined according to the following procedure:

To a 10 mL Schlenk tube was charged with **Cat.1** (from 0.03M to 0.06M), Zn(OTf)<sub>2</sub> (7.2 mg, 10 mol%), *p*-Toluenethiol (**1o**) (0.2 mmol, 1.0 equiv.) and an oven-dried stirring bar. The Schlenck tube was subjected to three cycles of pressurization–depressurization using dry argon. After that, under the protection of argon atmosphere, HFIP (0.5 mL, 0.4 M), MeOH (16μL, 2.0 equiv.) and dodecane as an internal standard was added and the reaction mixture was stirred at 150 °C. Subsequently, appropriate time to take sample 1-2 drops to check yield by GC.

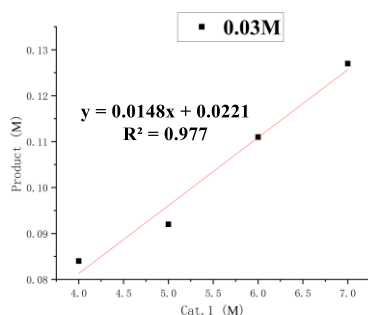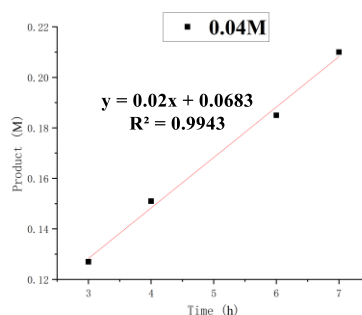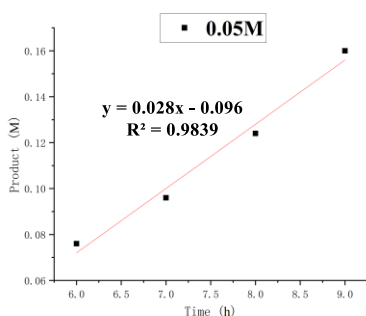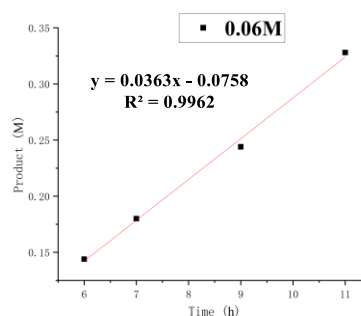

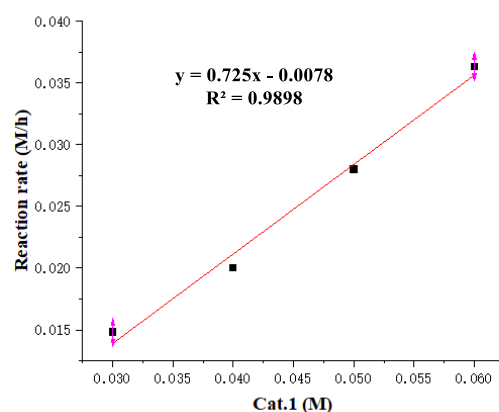

## B: Kinetic Order in Zn(OTf)<sub>2</sub> in HFIP

The order in **Zn(OTf)<sub>2</sub>** was determined according to the following procedure:

To a 10 mL Schlenk tube was charged with **Cat.1** (5.5 mg 10%), Zn(OTf)<sub>2</sub> (from 0,02M to 0,05M), *p*-Toluenethiol (**1o**) (0.2 mmol, 1.0 equiv.) and an oven-dried stirring bar. The Schlenck tube was subjected to three cycles of pressurization–depressurization using dry argon. After that, under the protection of argon atmosphere, HFIP (0.5 mL, 0.4 M), MeOH (16μL, 2.0 equiv.) and dodecane as an internal standard was added and the reaction mixture was stirred at 150 °C. Subsequently, appropriate time to take sample 1-2 drops to check yield by GC.

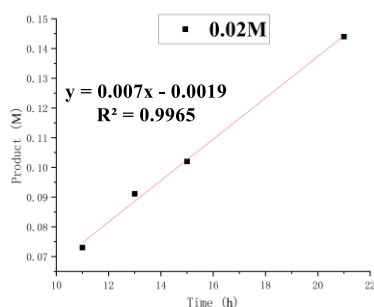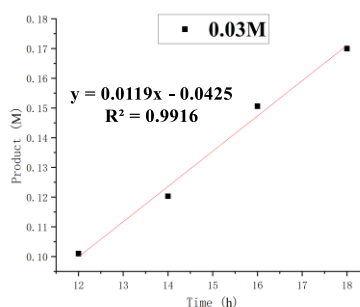

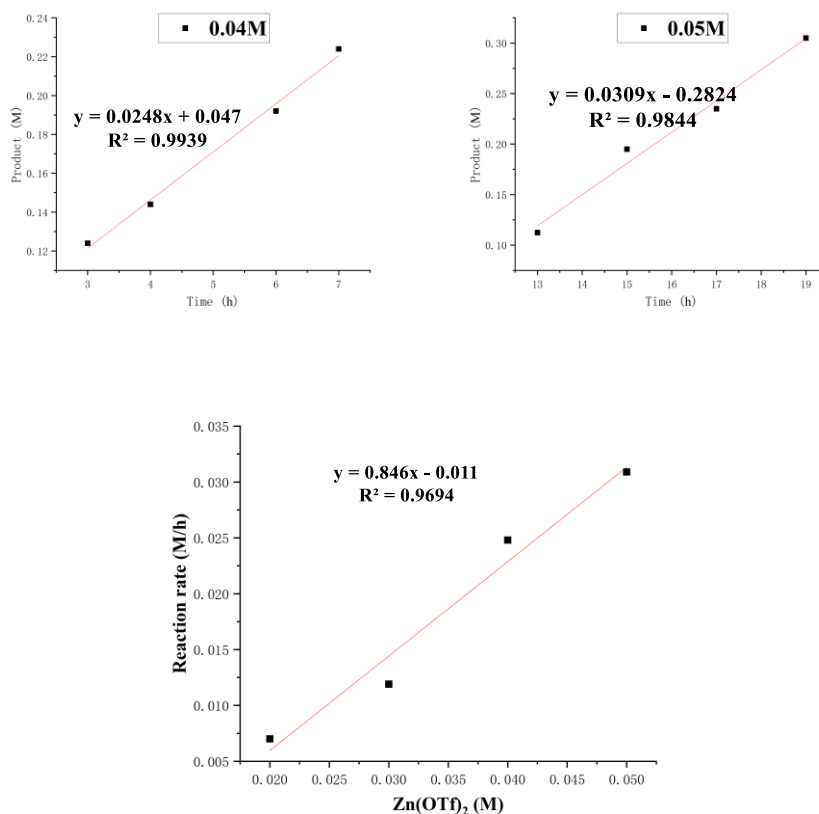

### C: Kinetic Order in *p*-Toluenethiol (**1o**) in HFIP

The order in ***p*-Toluenethiol (**1o**)** was determined according to the following procedure:

To a 10 mL Schlenk tube was charged with **Cat.1** (5.5 mg 10%), Zn(OTf)<sub>2</sub> (7.2 mg, 10 mol%), *p*-Toluenethiol (**1o**) (from 0.2M to 0.5M) and an oven-dried stirring bar. The Schlenk tube was subjected to three cycles of pressurization–depressurization using dry argon. After that, under the protection of argon atmosphere, HFIP (0.5 mL, 0.4 M), MeOH (16μL, 2.0 equiv.) and dodecane as an internal standard was added and the reaction mixture was stirred at 150 °C. Subsequently, appropriate time to take sample 1-2 drops to check yield by GC.

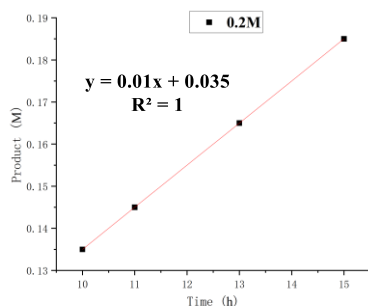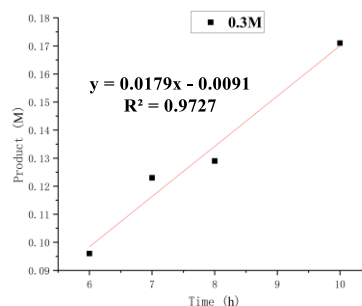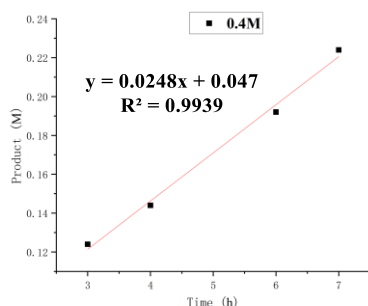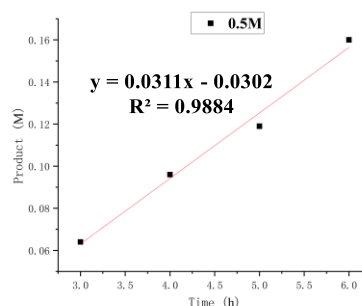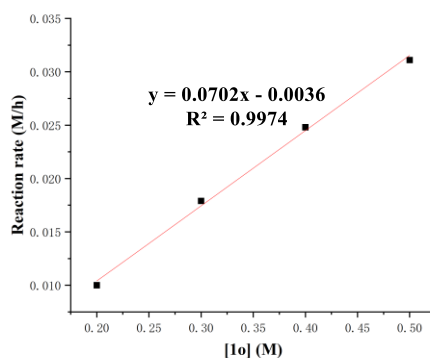

#### D: Kinetic Order in MeOH in HFIP

The order in **MeOH** was determined according to the following procedure:

To a 10 mL Schlenk tube was charged with **Cat.1** (5.5 mg 10%), Zn(OTf)<sub>2</sub> (7.2 mg, 10 mol%), *p*-Toluenethiol (**1o**) (0.2 mmol, 1.0 equiv.) and an oven-dried stirring bar. The Schlenk tube was subjected to three cycles of pressurization–depressurization using dry argon. After that, under the protection of argon atmosphere, HFIP (0.5 mL, 0.4 M), MeOH (from 0.4M to 1.2M) and dodecane as an internal standard was added and the reaction mixture was stirred at 150 °C, Subsequently, appropriate time to take sample 1-2 drops to check yield by GC.

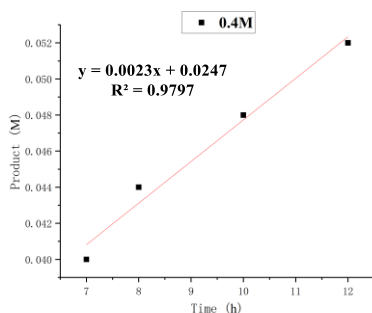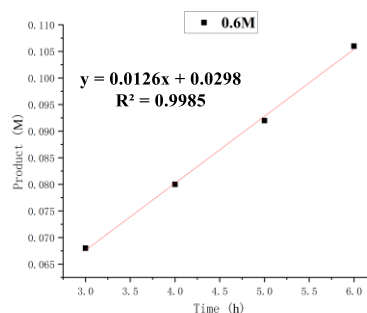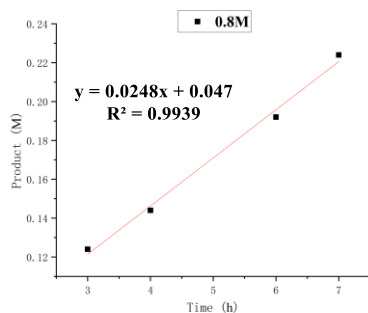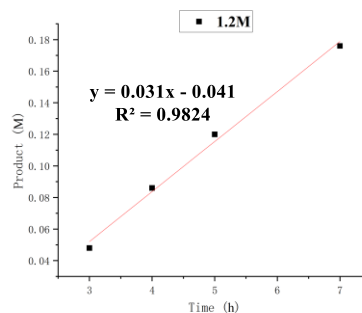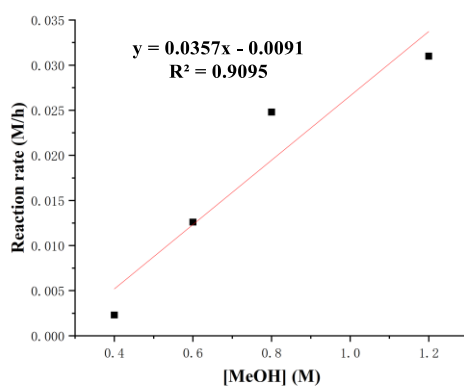

## 7.4 Kinetic Studies in Hexane

### A: Kinetic Order in Cat.1 in Hexane

The order in **Cat.1** was determined according to the following procedure:

To a 10 mL Schlenk tube was charged with **Cat.1** (from 0.02M to 0.05M), Zn(OTf)<sub>2</sub> (7.2 mg, 10 mol%), *p*-Toluenethiol (**1o**) (0.2 mmol, 1.0 equiv.) and an oven-dried stirring bar. The Schlenck tube was subjected to three cycles of pressurization–

depressurization using dry argon. After that, under the protection of argon atmosphere, Hexane (0.5 mL, 0.4 M), MeOH (16 $\mu$ L, 2.0 equiv.) and dodecane as an internal standard was added and the reaction mixture was stirred at 150 °C, Subsequently, appropriate time to take sample 1-2 drops to check yield by GC.

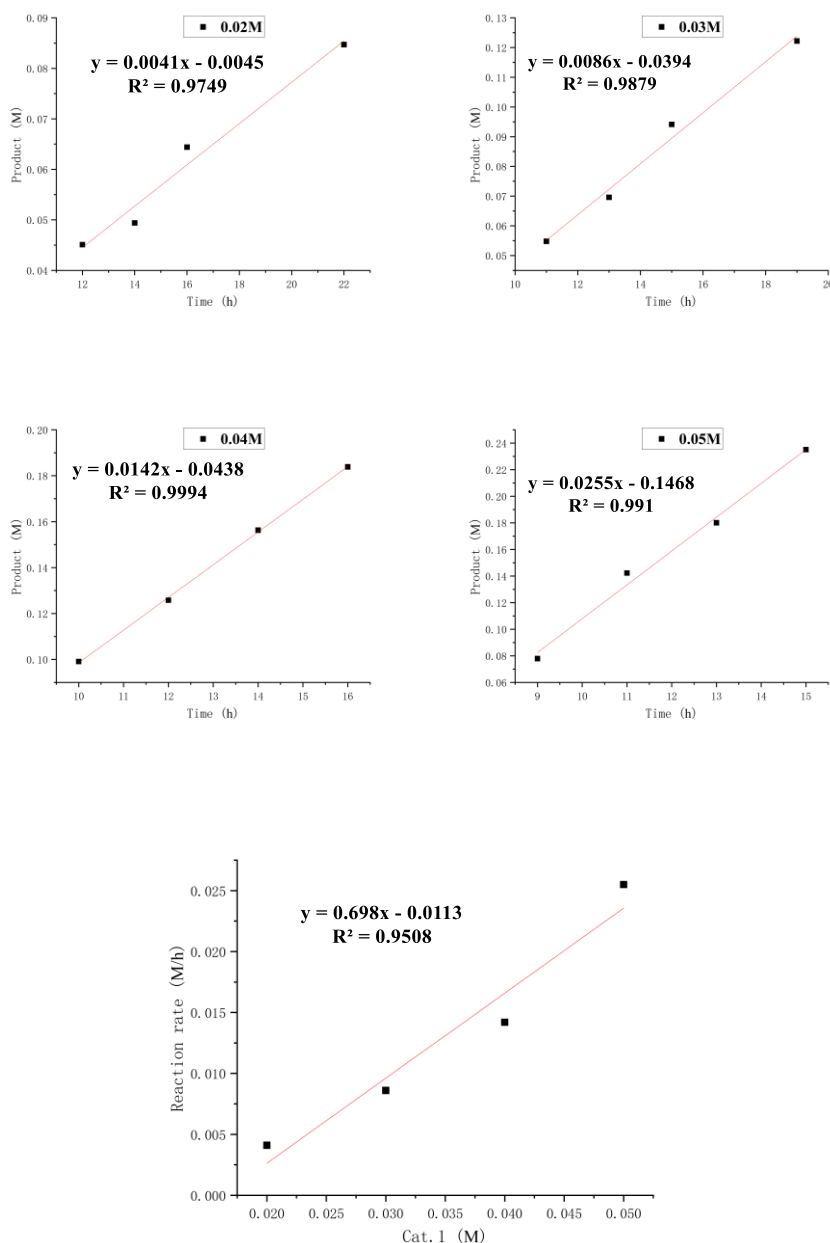

## B: Kinetic Order in Zn(OTf)<sub>2</sub> in Hexane

The order in **Zn(OTf)<sub>2</sub>** was determined according to the following procedure:

To a 10 mL Schlenk tube was charged with **Cat.1** (5.5 mg 10%), Zn(OTf)<sub>2</sub> (from 0.03M to 0.06M), *p*-Toluenethiol (**1o**) (0.2 mmol, 1.0 equiv.) and an oven-dried stirring bar.

The Schlenk tube was subjected to three cycles of pressurization–depressurization using dry argon. After that, under the protection of argon atmosphere, Hexane (0.5 mL, 0.4 M), MeOH (16 $\mu$ L, 2.0 equiv.) and dodecane as an internal standard was added and the reaction mixture was stirred at 150 °C, Subsequently, appropriate time to take sample 1-2 drops to check yield by GC.

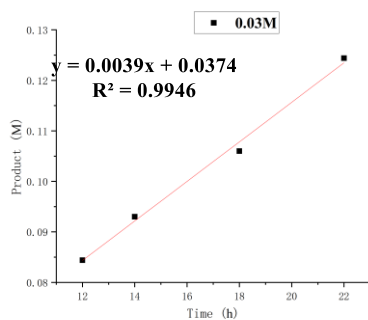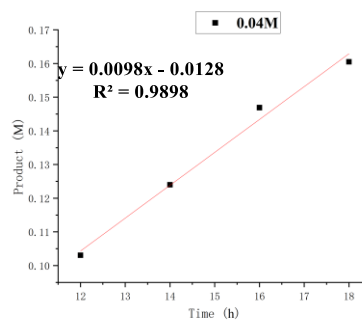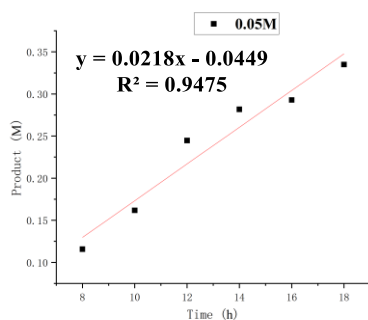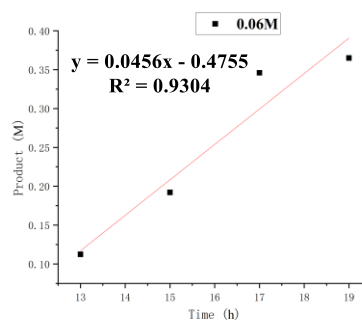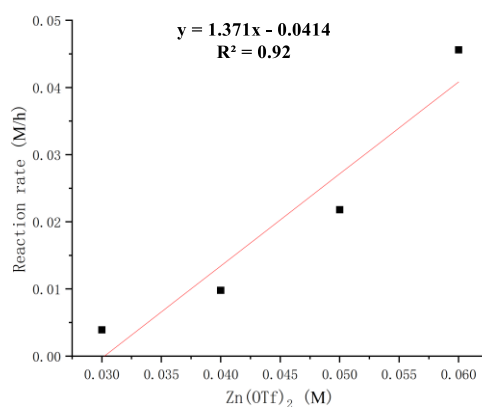

### C: Kinetic Order in *p*-Toluenethiol (1o) in Hexane

The order in *p*-Toluenethiol (1o) was determined according to the following procedure:

To a 10 mL Schlenk tube was charged with **Cat.1** (5.5 mg 10%), Zn(OTf)<sub>2</sub>(7.2 mg, 10 mol%), *p*-Toluenethiol (**1o**) (from 0.3M to 0.6M) and an oven-dried stirring bar. The Schlenck tube was subjected to three cycles of pressurization–depressurization using dry argon. After that, under the protection of argon atmosphere, HFIP (0.5 mL, 0.4 M), MeOH (16μL, 2.0 equiv.) and dodecane as an internal standard was added and the reaction mixture was stirred at 150 °C, Subsequently, appropriate time to take sample 1-2 drops to check yield by GC.

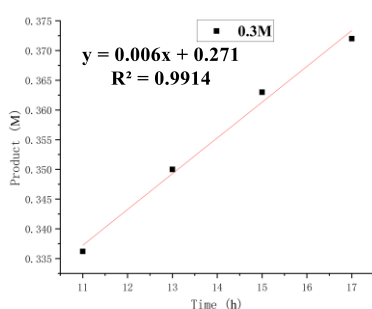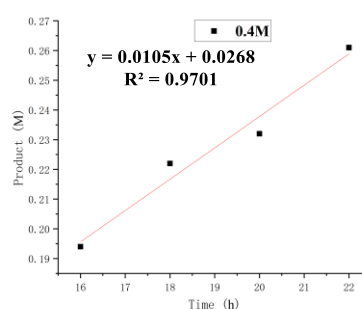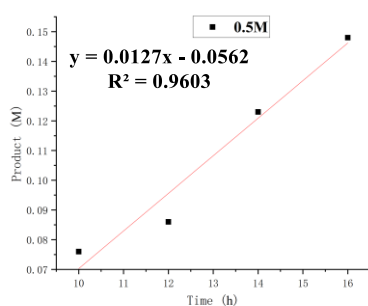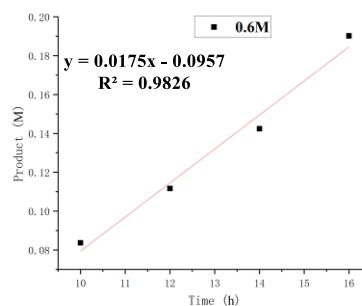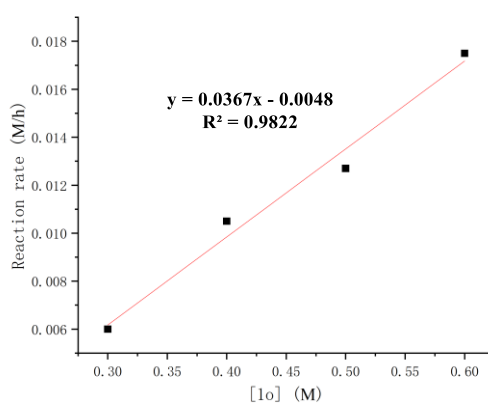



## D: Kinetic Order in MeOH in Hexane

The order in **MeOH** was determined according to the following procedure:

To a 10 mL Schlenk tube was charged with **Cat.1** (5.5 mg 10%), Zn(OTf)<sub>2</sub> (7.2 mg, 10 mol%), *p*-Toluenethiol (**1o**) (0.2 mmol, 1.0 equiv.) and an oven-dried stirring bar. The Schlenk tube was subjected to three cycles of pressurization–depressurization using dry argon. After that, under the protection of argon atmosphere, HFIP (0.5 mL, 0.4 M), MeOH (from 1.6 M to 2.8 M) and dodecane as an internal standard was added and the reaction mixture was stirred at 150 °C. Subsequently, appropriate time to take sample 1-2 drops to check yield by GC.

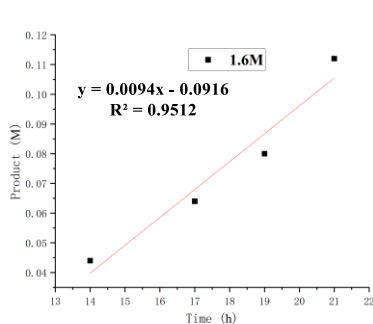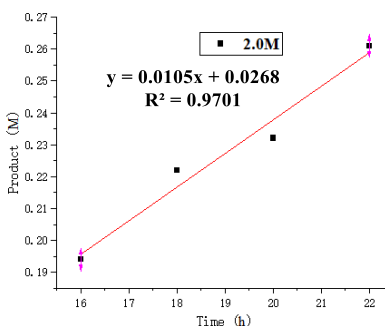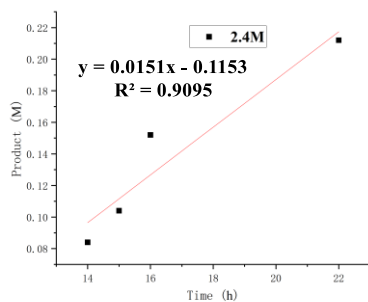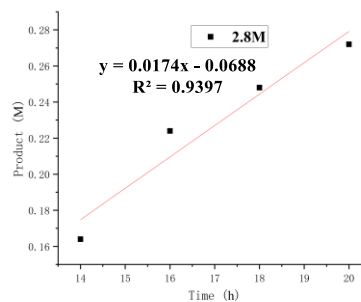

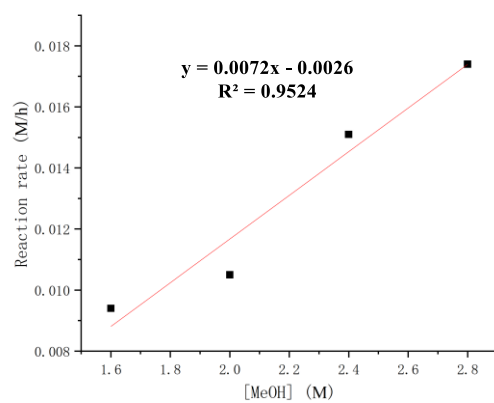

## 7.5 Hammett plot

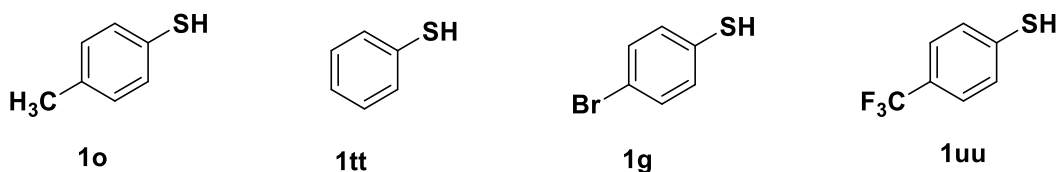

To a 10 mL Schlenk tube was charged with **Cat.1** (11 mg, 20 mol%), Zn(OTf)<sub>2</sub> (14.4 mg, 10 mol%), The Schlenck tube was subjected to three cycles of pressurization–depressurization using dry argon. After that, under the protection of argon atmosphere, mixture two different *p*-substituted substrates **1** (**1o** and **1tt**; **1g** and **1tt**; **1u** and **1tt**, 0.2 mmol each, 1.0 equiv), HFIP (1 mL), MeOH (32 μL 2.0 equiv.) and CH<sub>2</sub>Br<sub>2</sub> (7 μL) was added as an internal standard and then the reaction mixture was stirred at 150 °C. The aliquot (approximately 50 μL) of the reaction mixture was taken at the indicated time intervals, and immediately added with CD<sub>3</sub>Cl to filter with a filter head. The composition of mixture was analyzed by <sup>1</sup>H NMR to determine the reduced molar amount of **1**. The *k<sub>X</sub>* / *k<sub>H</sub>* data was calculated based on the reduced molar amount of **1** and the results were summarized as follows equation.

$$\frac{k_X}{k_H} = \frac{\frac{C_{X0}-C_{Xt}}{t}}{\frac{C_{H0}-C_{Ht}}{t}} = \frac{\frac{n_{X0}-n_{Xt}}{V}}{\frac{n_{H0}-n_{Ht}}{V}} = \frac{n_{X0}-n_{Xt}}{n_{H0}-n_{Ht}}$$

| Entry | <i>k<sub>X</sub></i> / <i>k<sub>H</sub></i> | <i>p</i> -substituted X | σ <sub>p</sub> <sup>a</sup> | log( <i>k<sub>X</sub></i> / <i>k<sub>H</sub></i> ) |
|-------|---------------------------------------------|-------------------------|-----------------------------|----------------------------------------------------|
| 1     | 1.1                                         | CH <sub>3</sub>         | -0.17                       | 0.04                                               |
| 2     | 1                                           | H                       | 0                           | 0                                                  |
| 3     | 0.827                                       | Br                      | 0.23                        | -0.08                                              |
| 4     | 0.7                                         | CF <sub>3</sub>         | 0.54                        | -0.15                                              |

<sup>a</sup>Data from: Hansch, C.; Leo, A.; Taft, R. W. A survey of Hammett substituent constants and resonance and field parameters. *Chem. Rev.* **1991**, 91, 165–195.

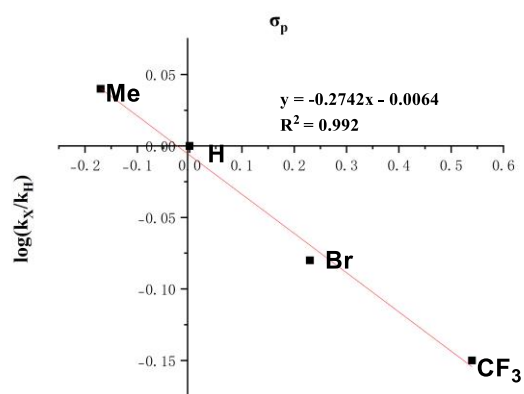

Hammett plots of  $\log(k_X/k_H)$  vs  $\sigma_p$

## 7.6 DFT calculations

### Section 1. Computational Details

All DFT calculations were using the Gaussian16 quantum chemistry package<sup>69</sup>. Structures were optimized at the B3LYP<sup>70,71</sup> theoretical levels in conjunction with the D3 dispersion correction,<sup>72–73</sup> Stuttgart-Dresden ECP (SDD) basis set<sup>74</sup> was used for Zn and 6-31G(d, p) basis set for other atoms. Frequency calculations were carried out at the same level of theory to obtain free energy corrections at 423.15 K<sup>75–76</sup> and to confirm the nature of the optimized geometries as minima (no imaginary frequency) or transition states (TS, one imaginary frequency). The single-point calculations of the optimized geometries were performed with B3LYP functional, SDD basis set for Zn and 6-311+G(2d,2p) basis set for other atoms. Solvent effects were considered in the single-point calculations with SMD continuum solvation model<sup>77</sup> in MeOH.

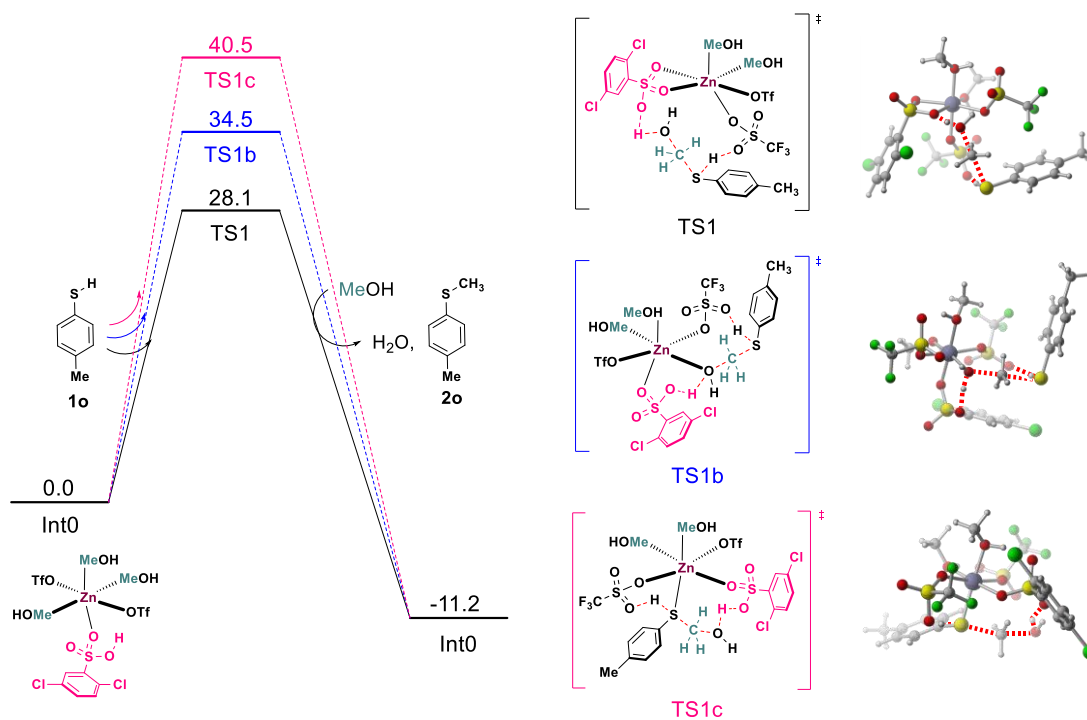

**Fig. S1.** Gibbs free energy profile (kcal/mol) for reaction profile of benzenethiol S-methylation (alternative pathways).

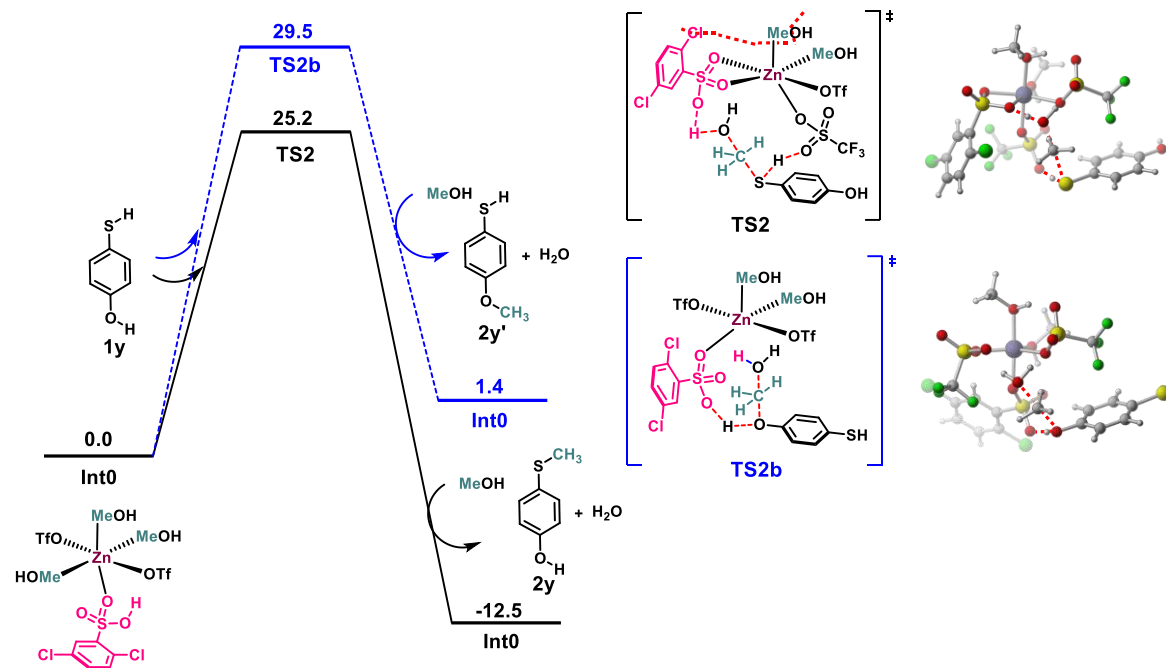

**Fig. S2.** Gibbs free energy profile (kcal/mol) for reaction profile of selective S-methylation over O-methylation

## 8 NMR spectroscopic data

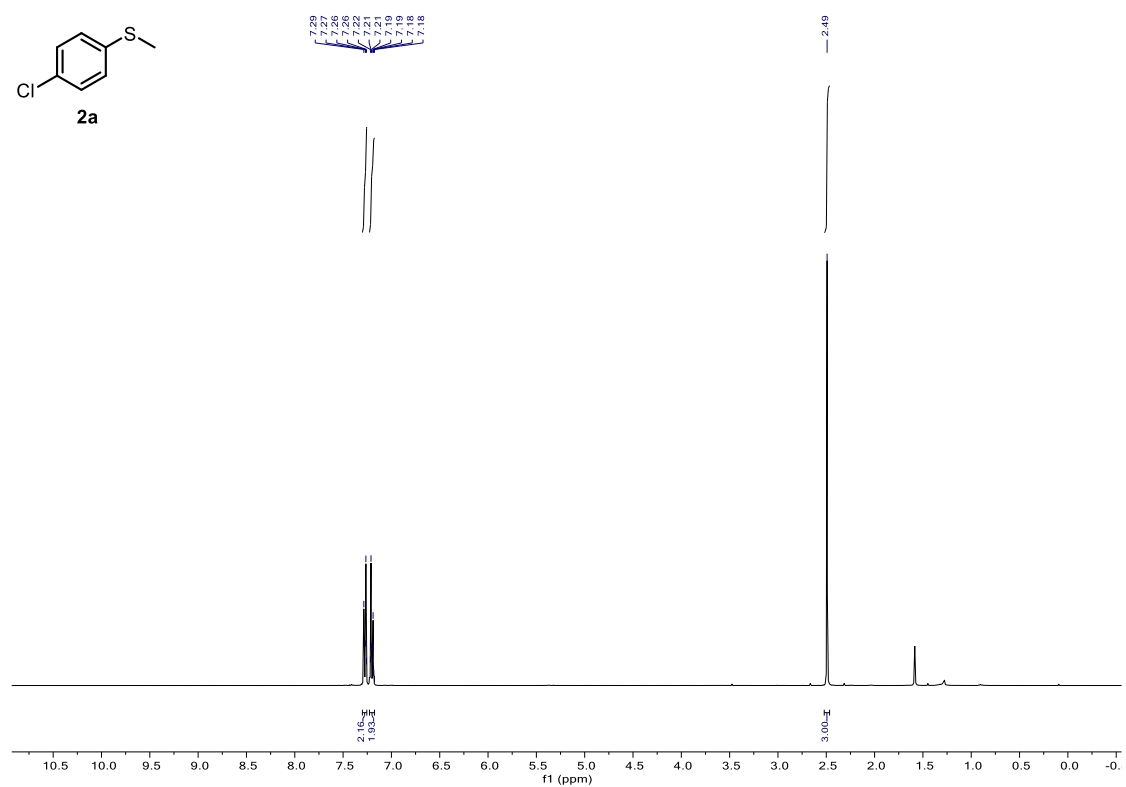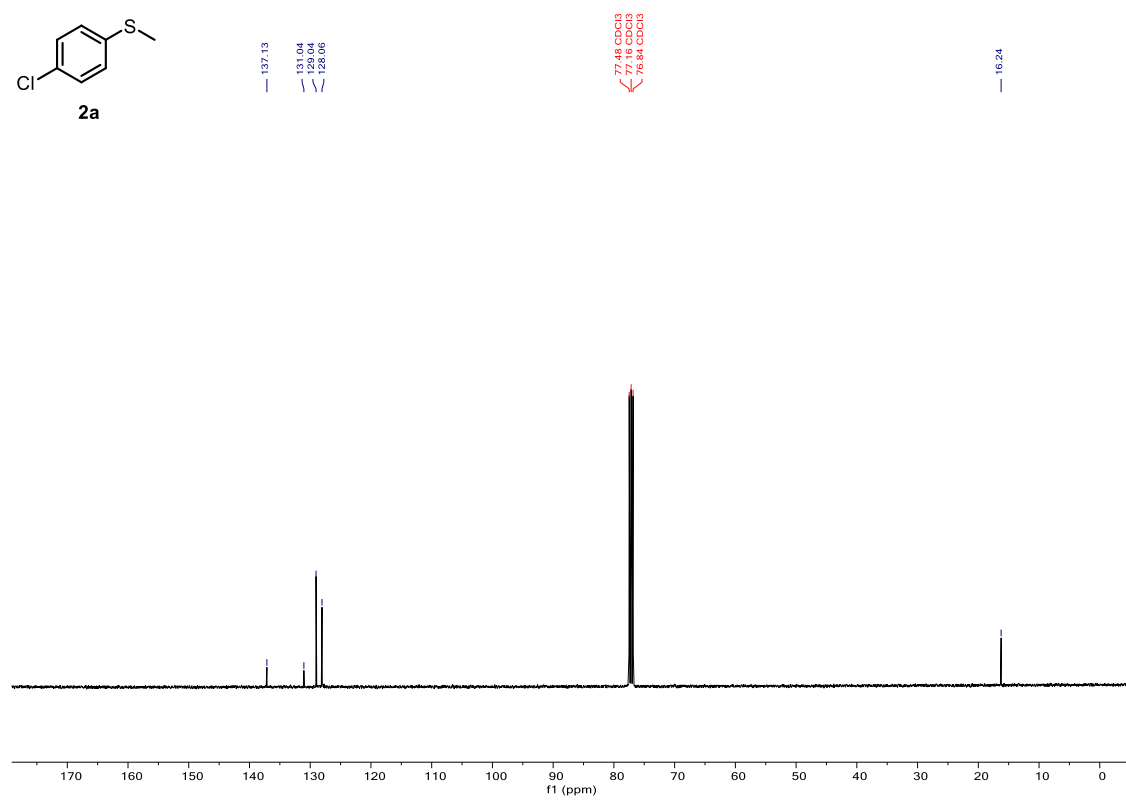

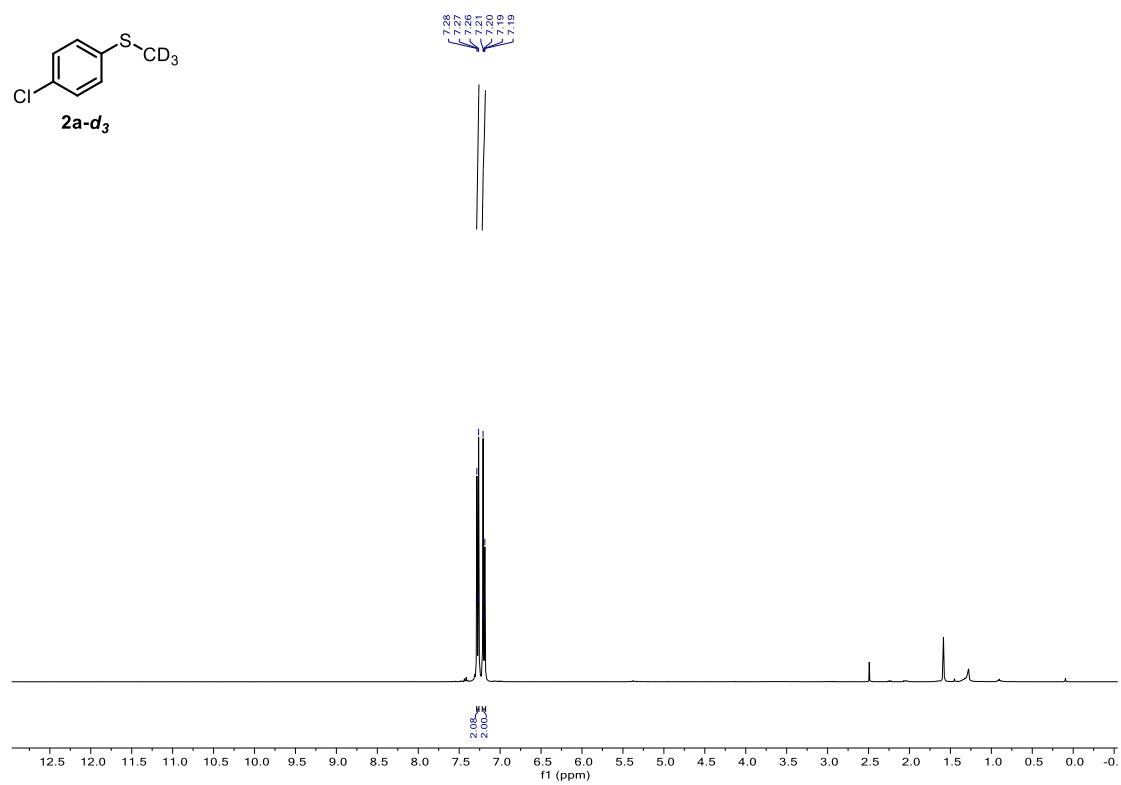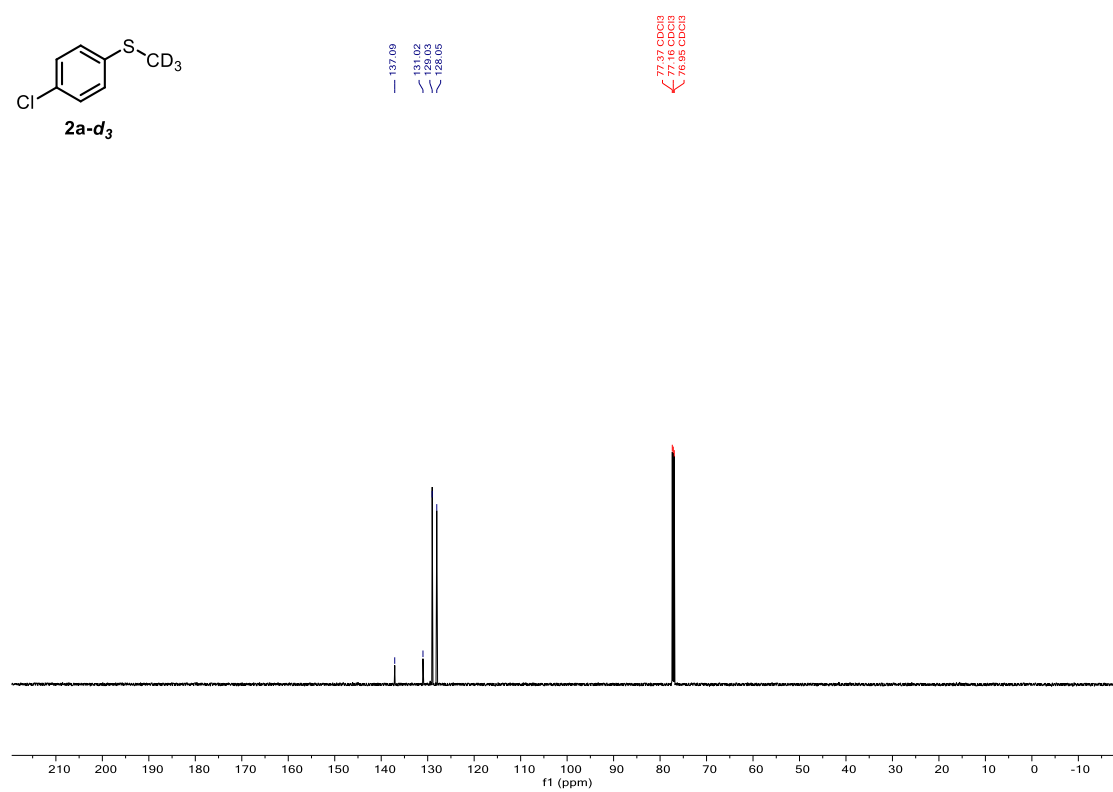



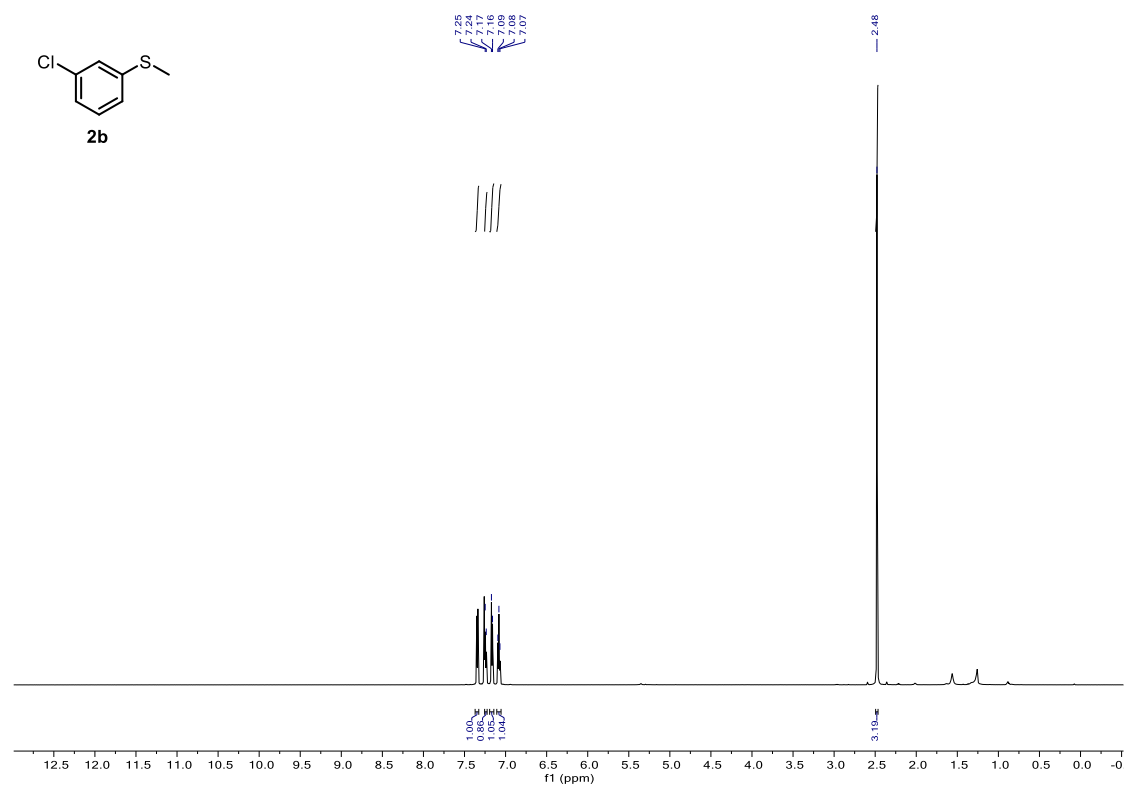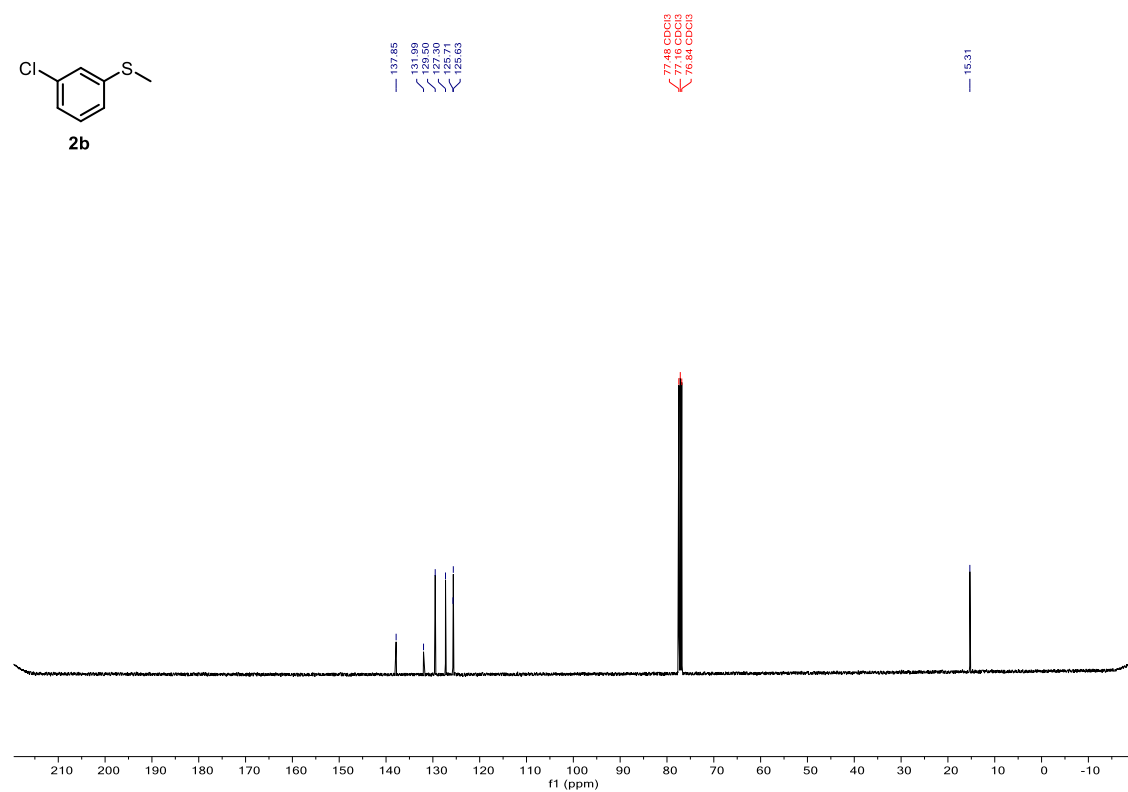

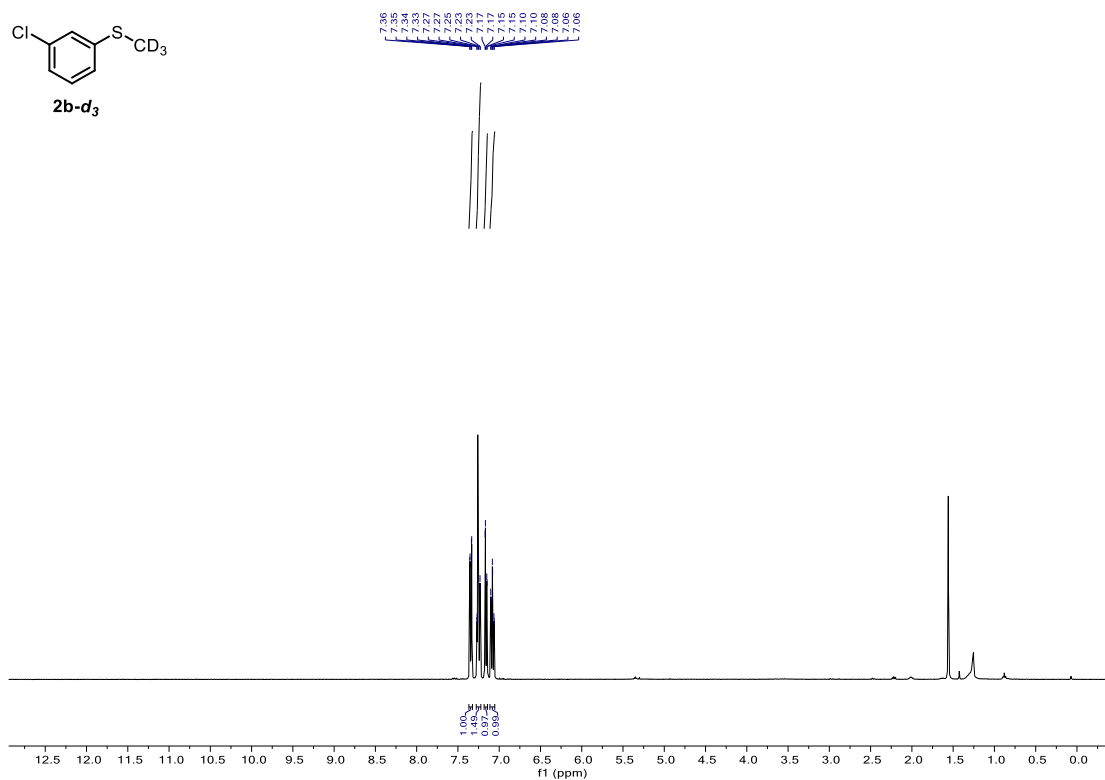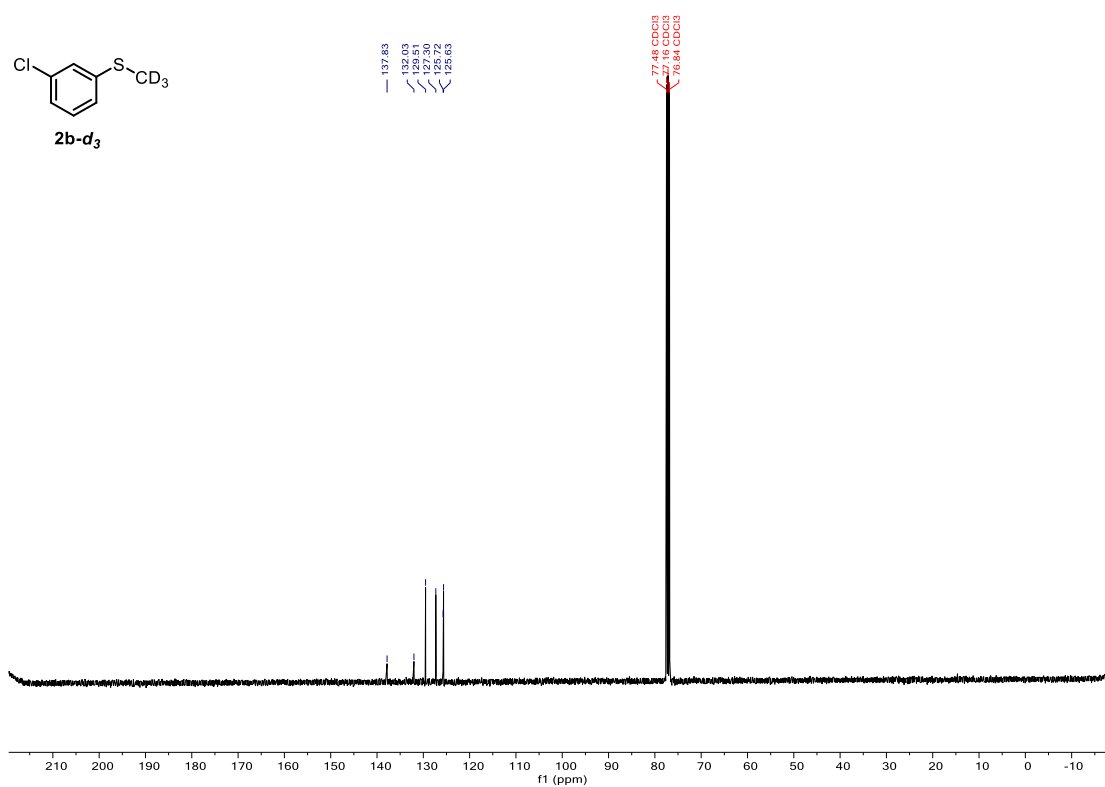

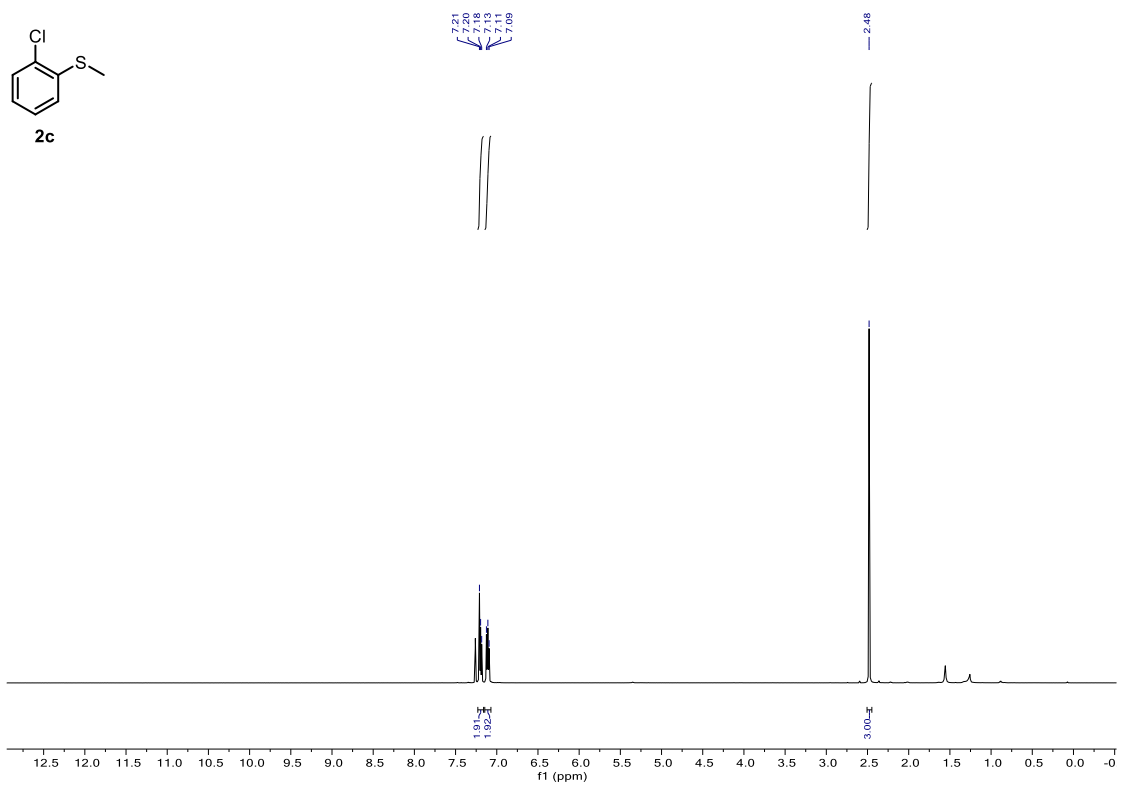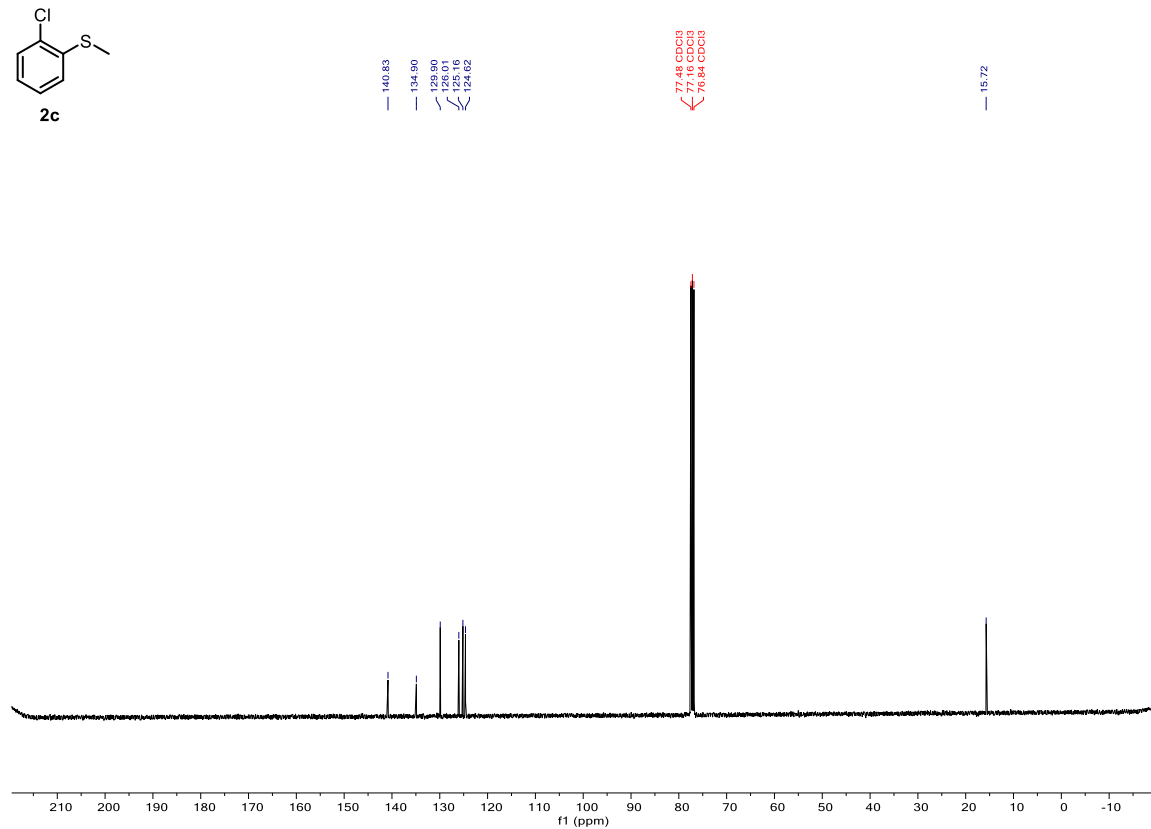

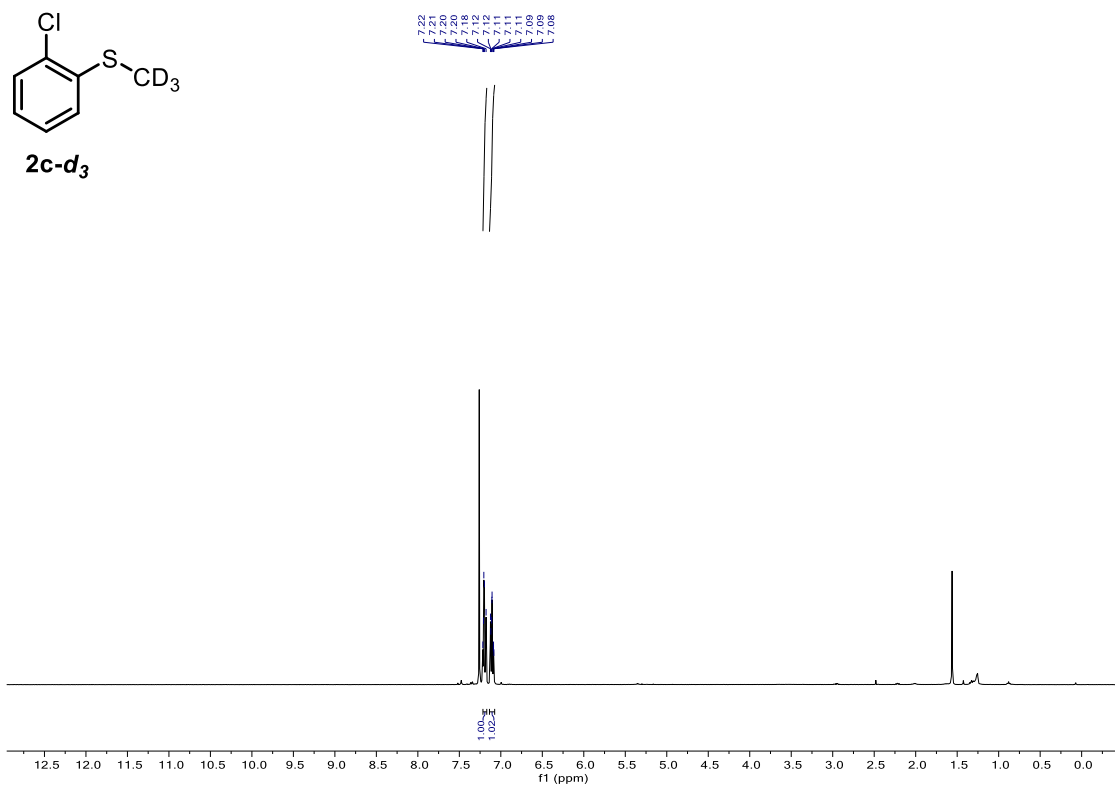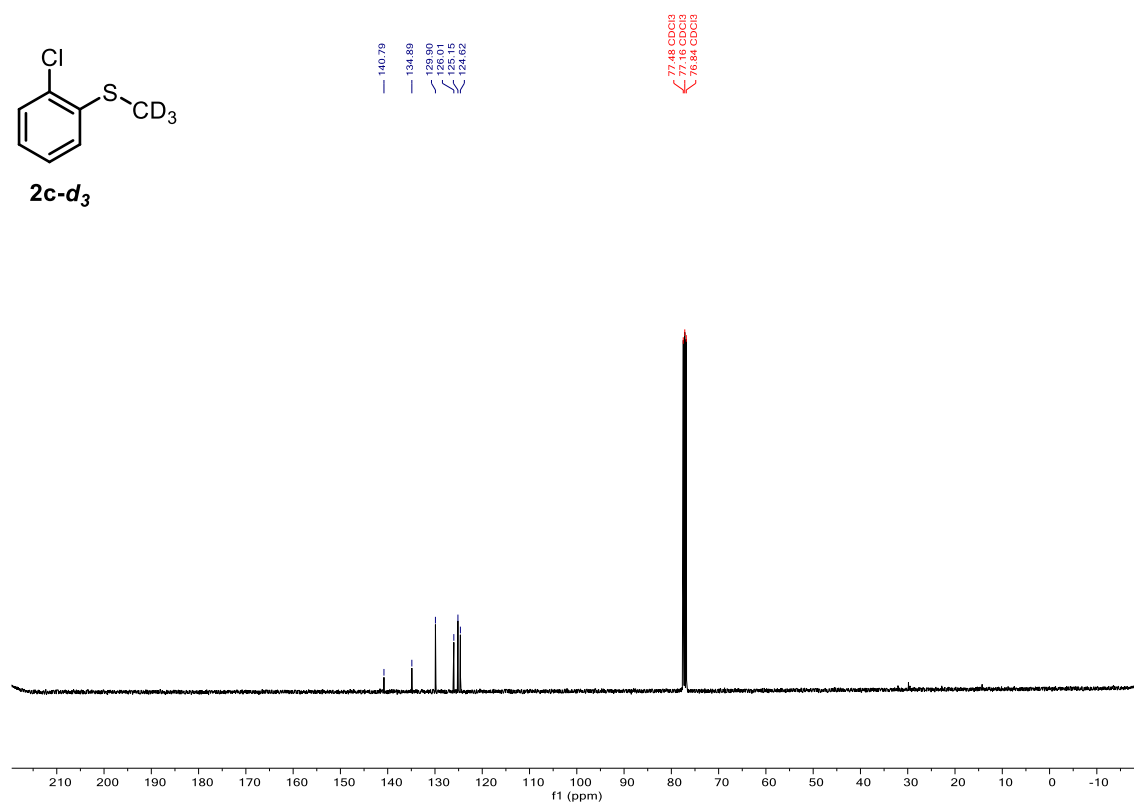

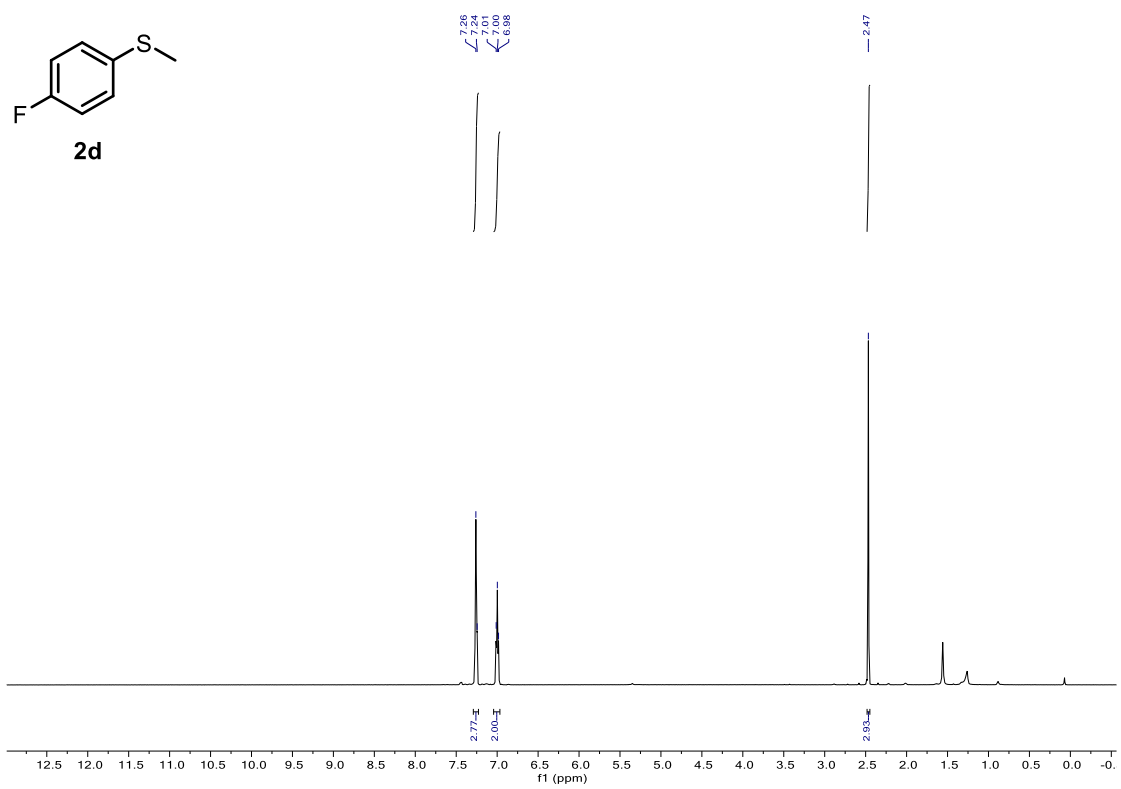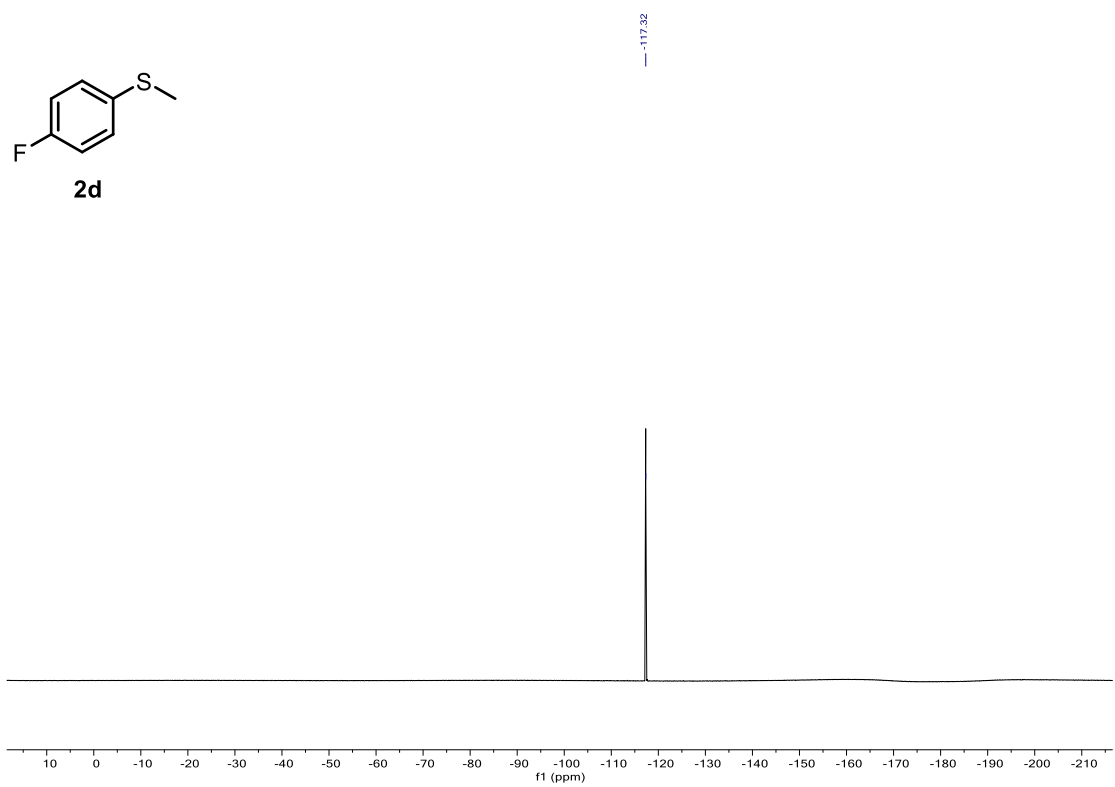

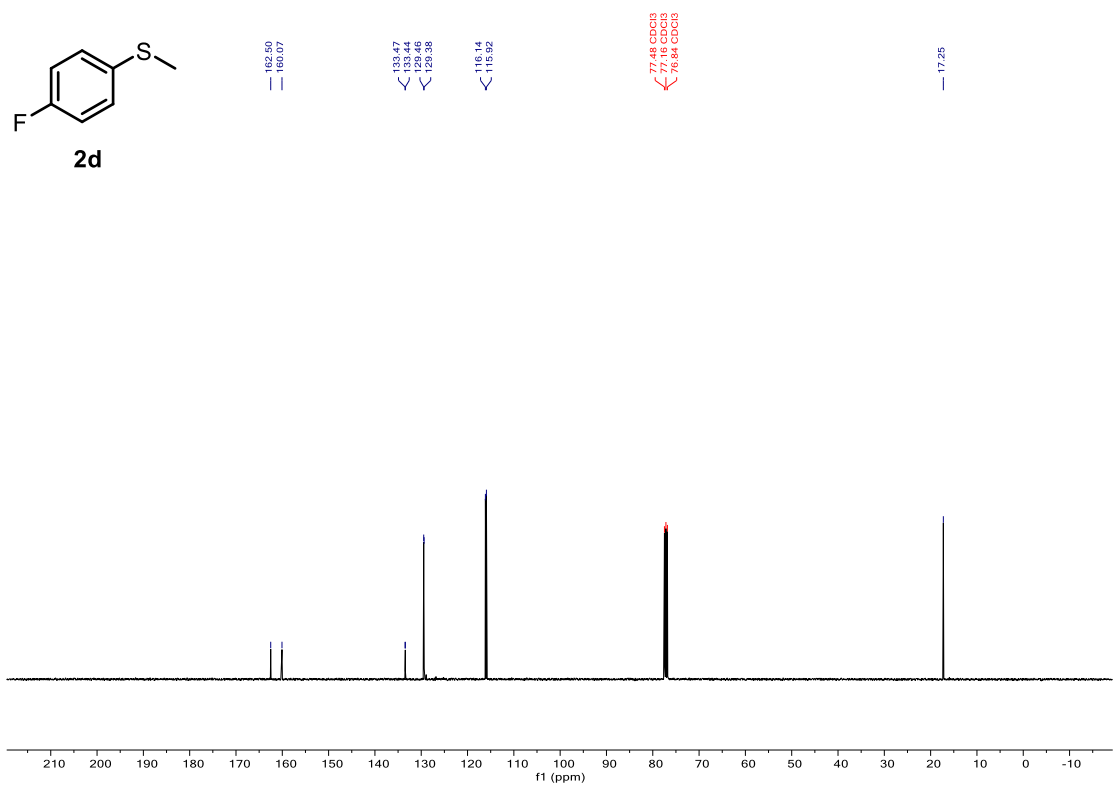

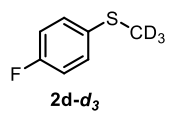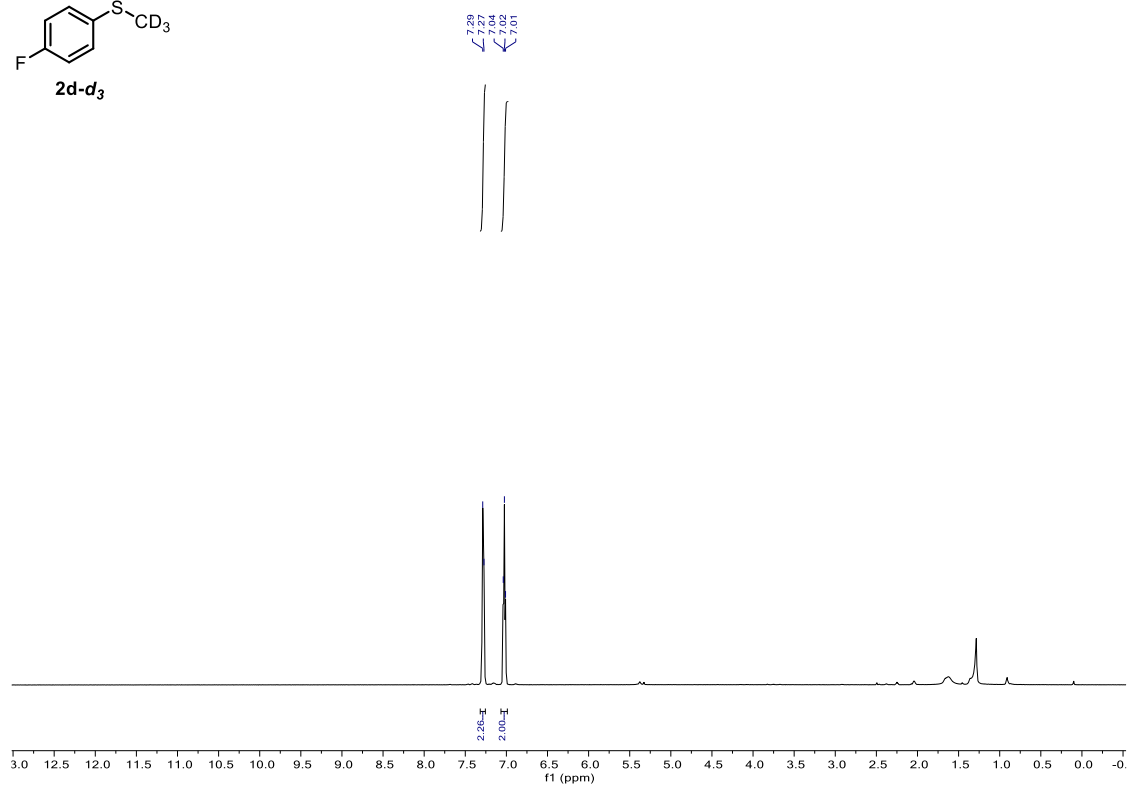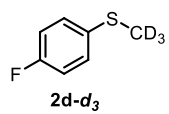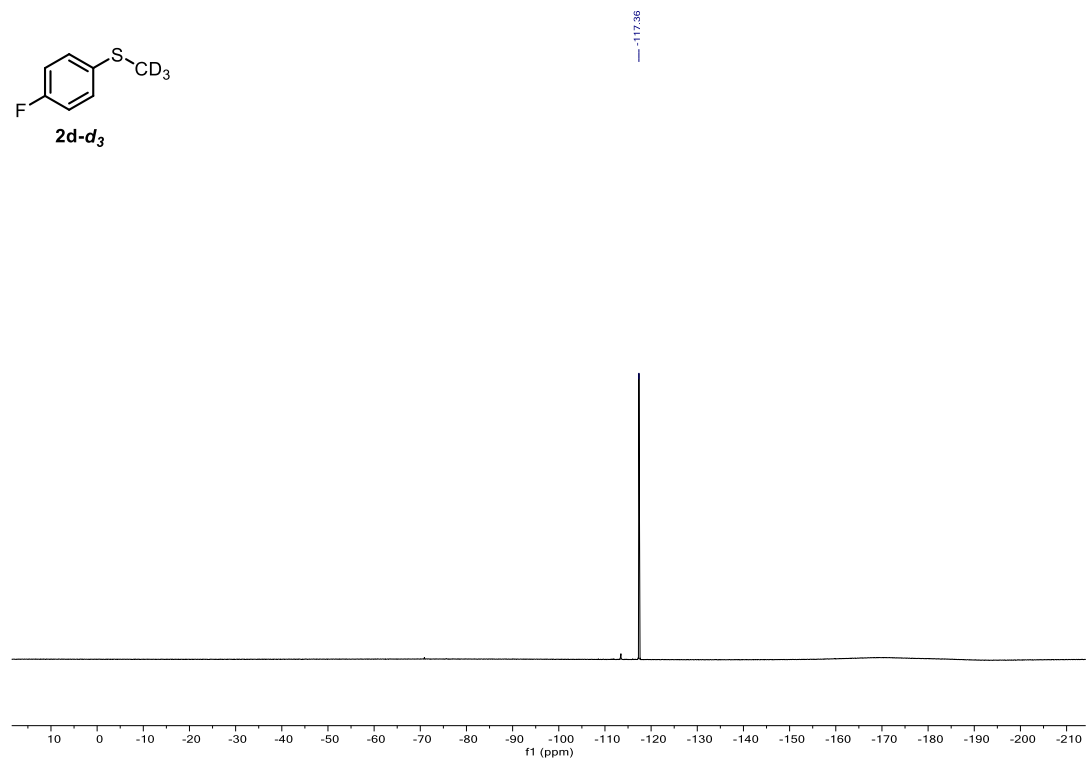

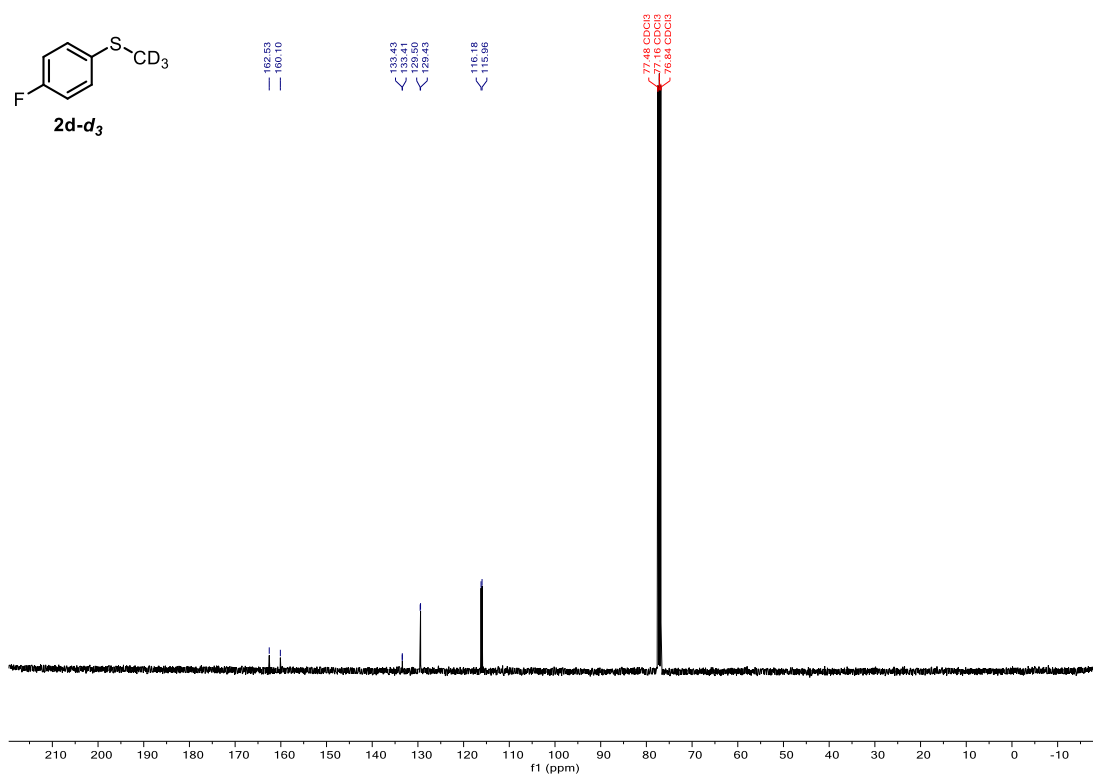



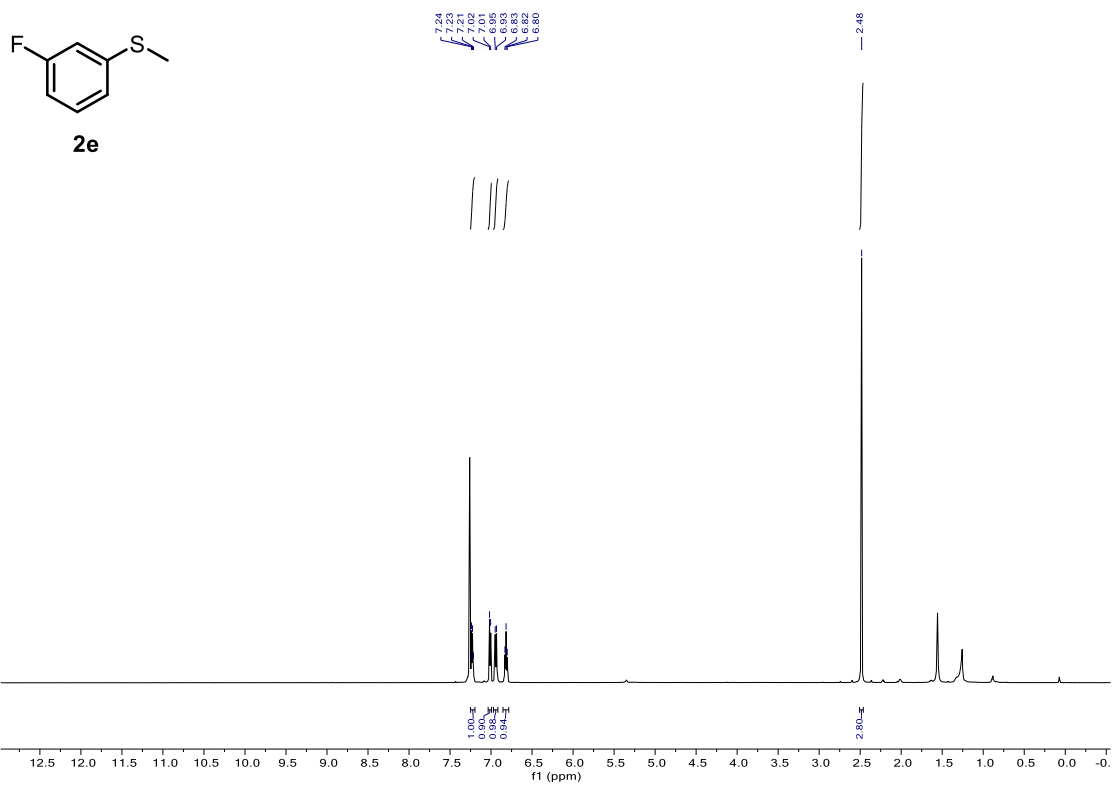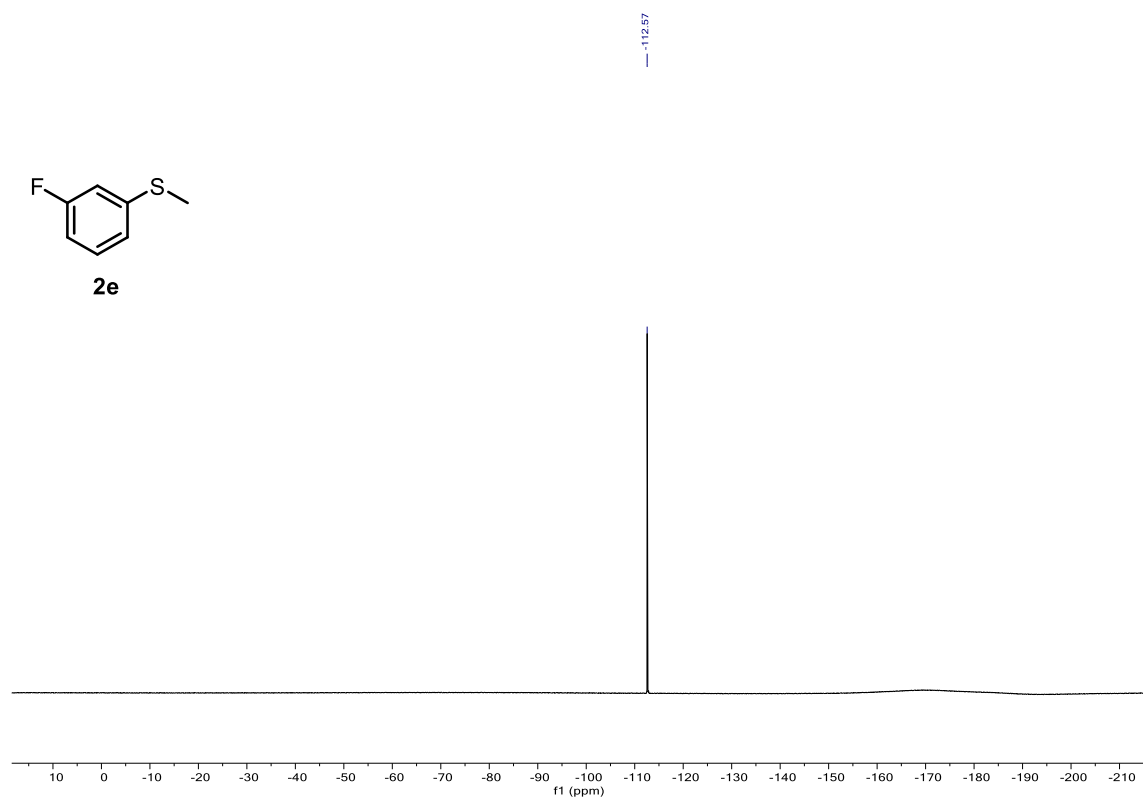

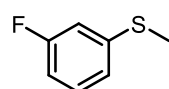

**2e**

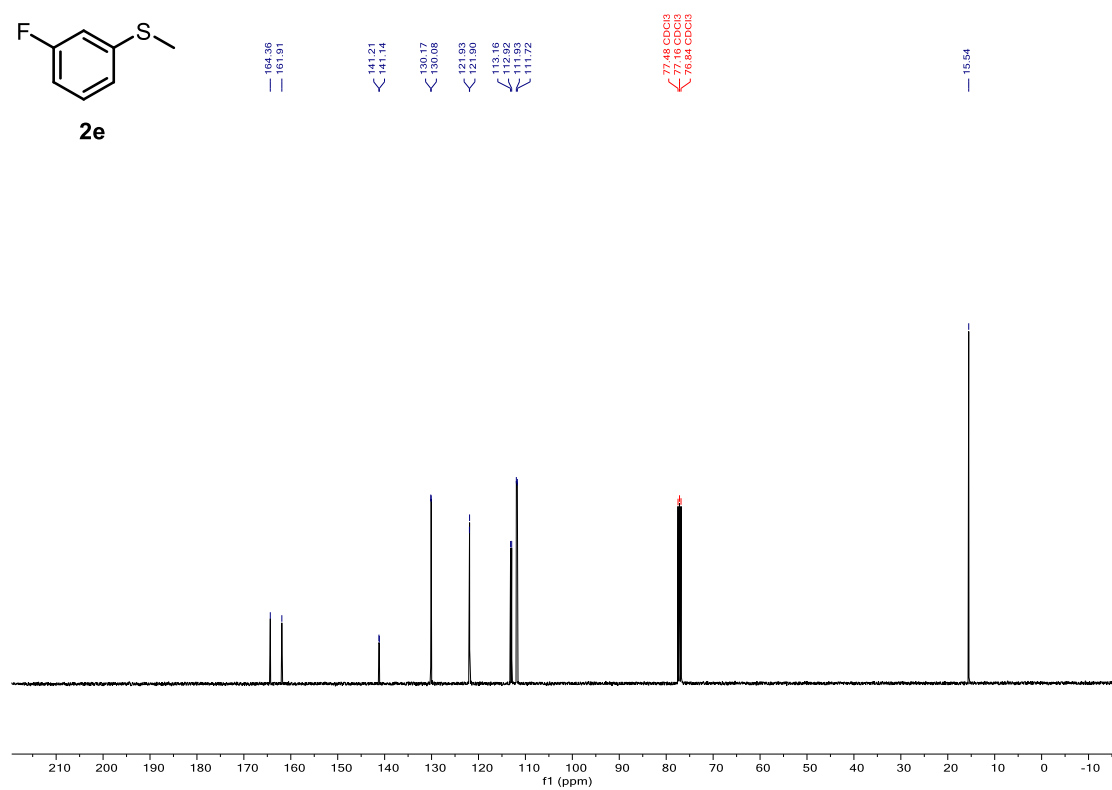

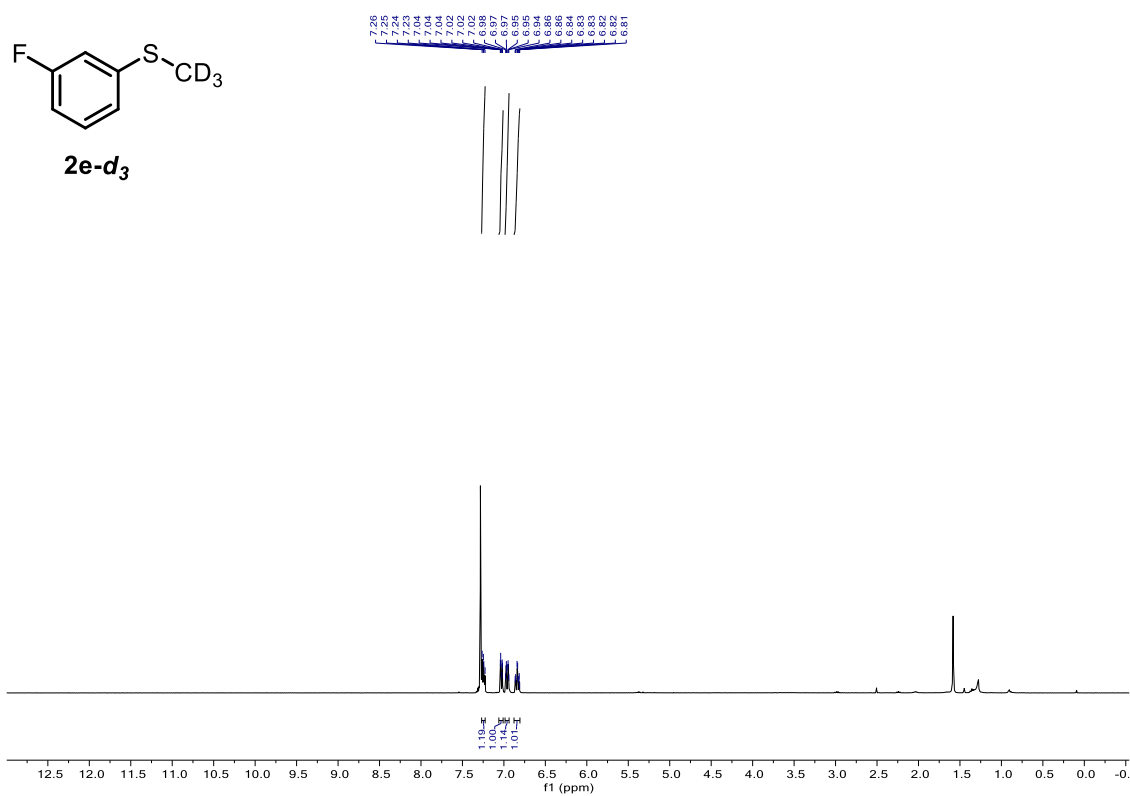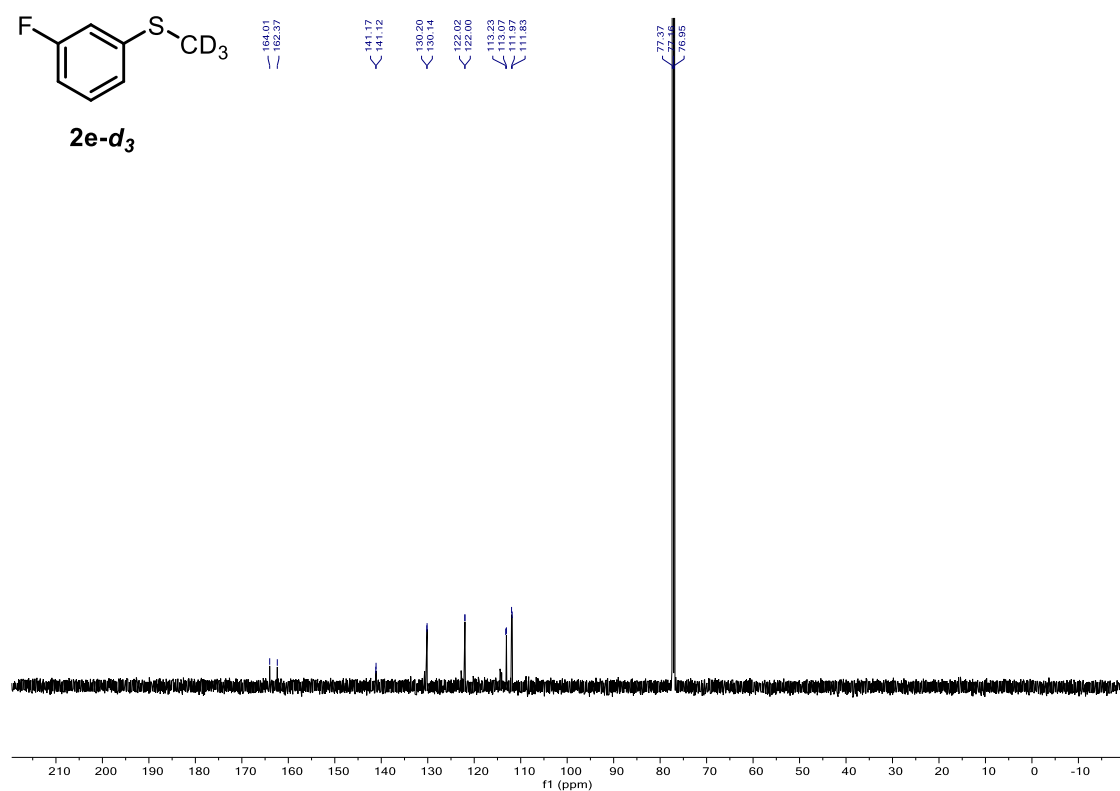

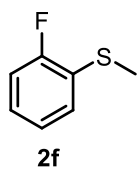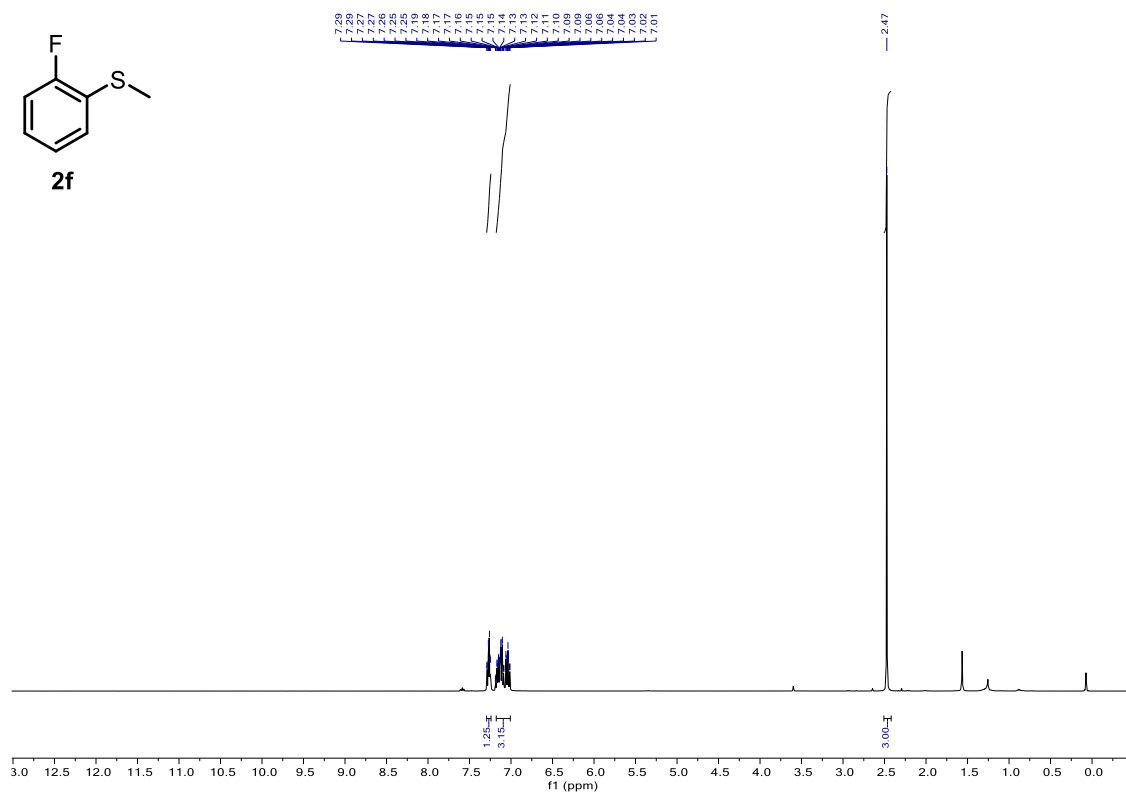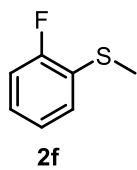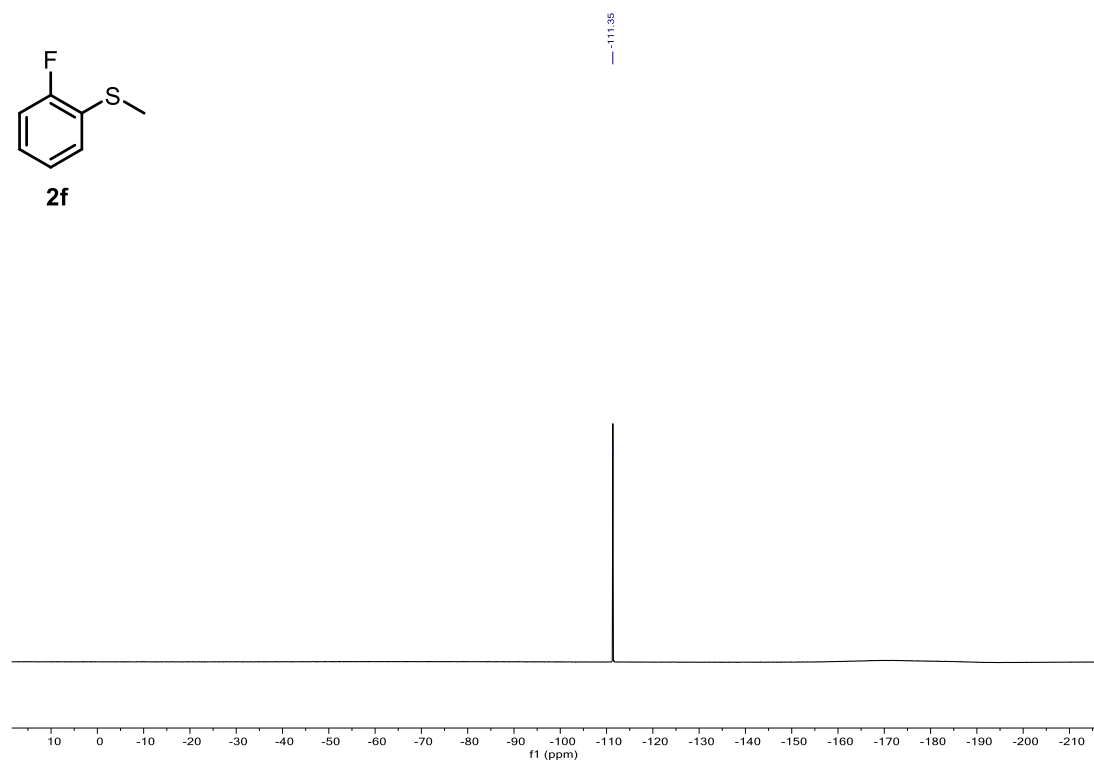

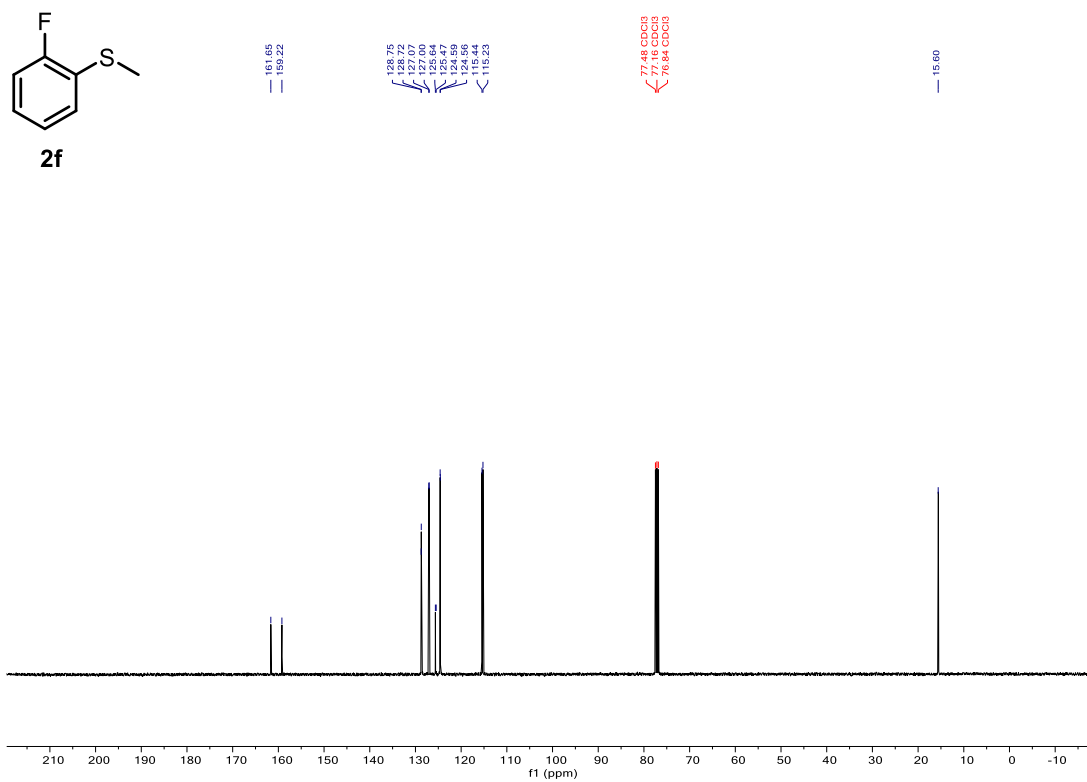

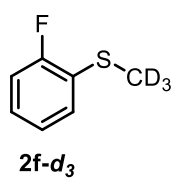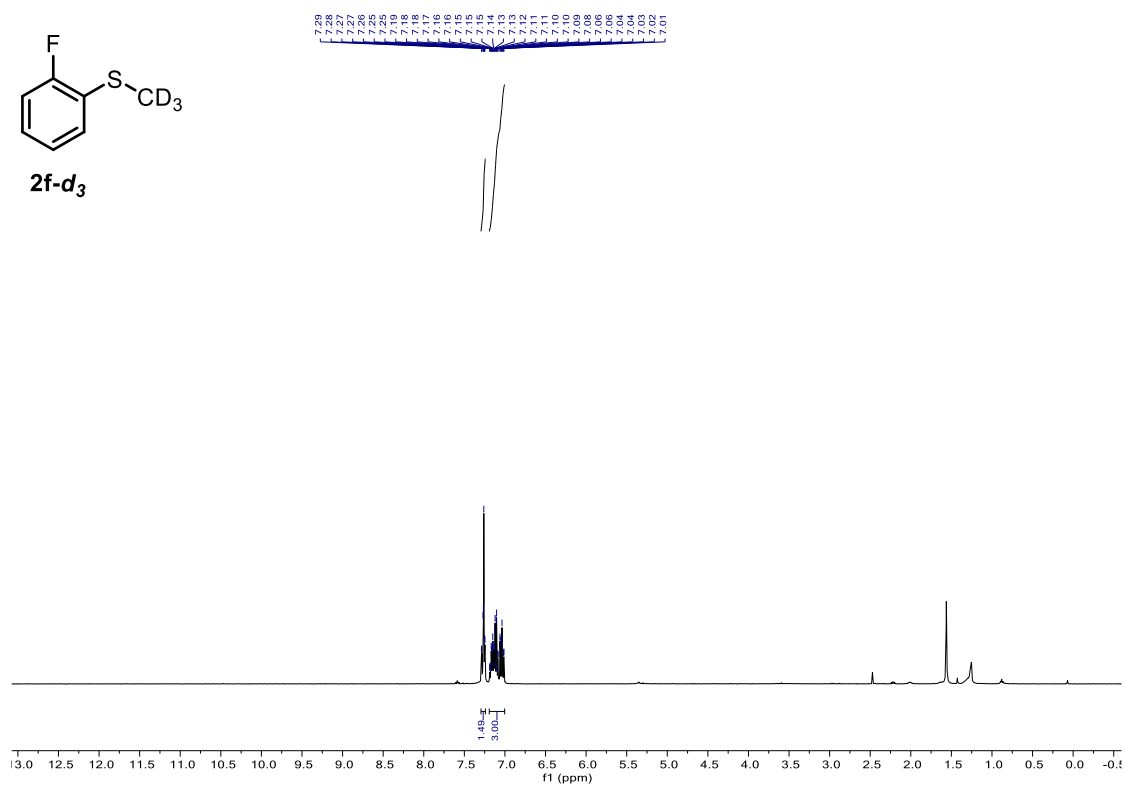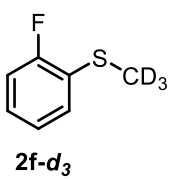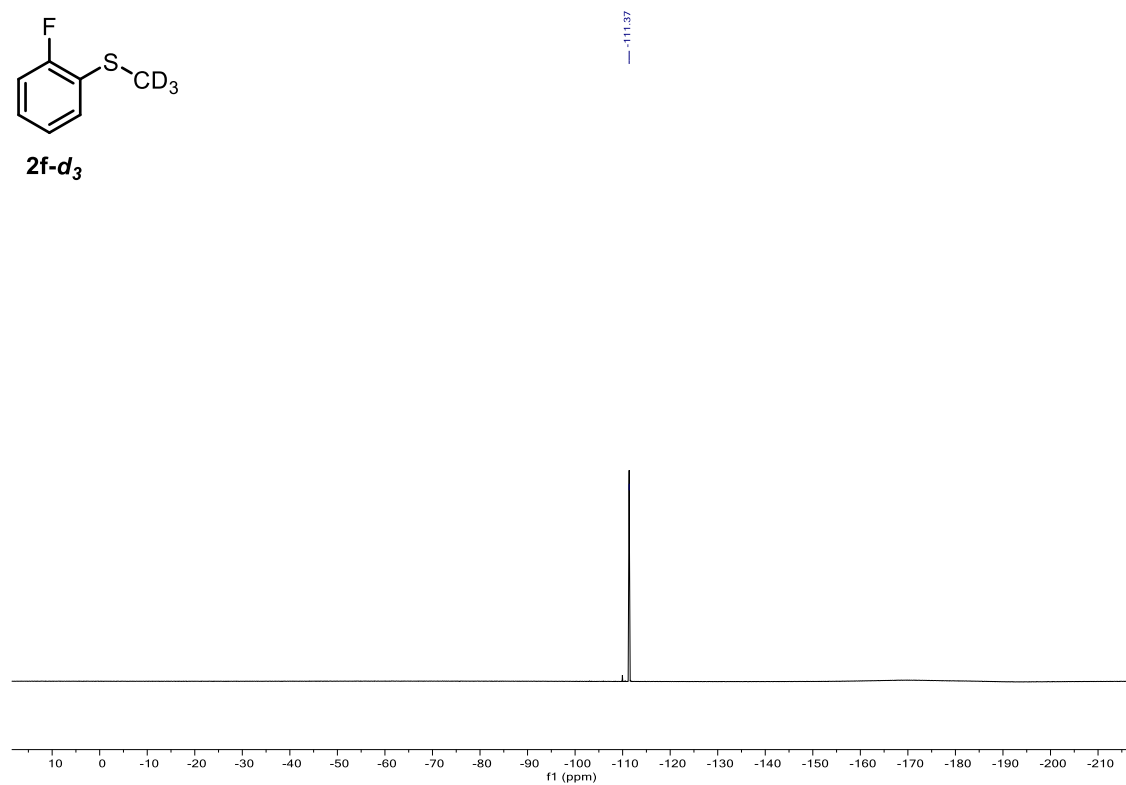

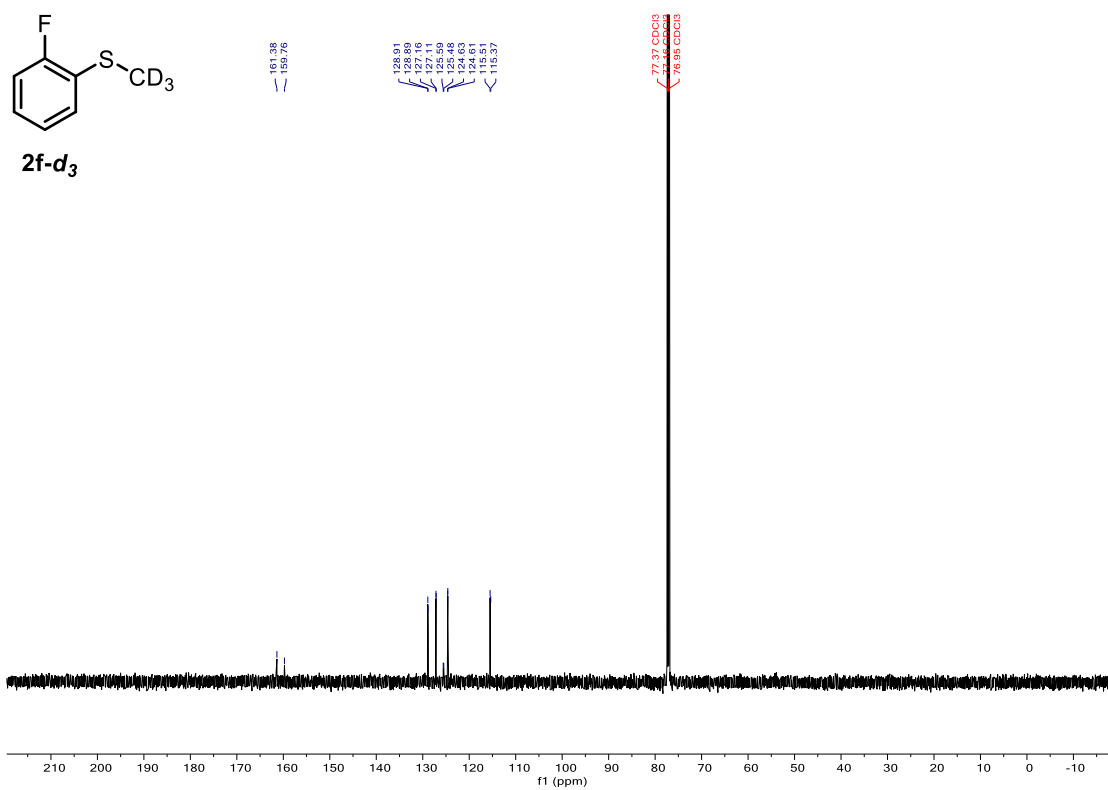

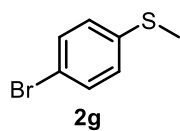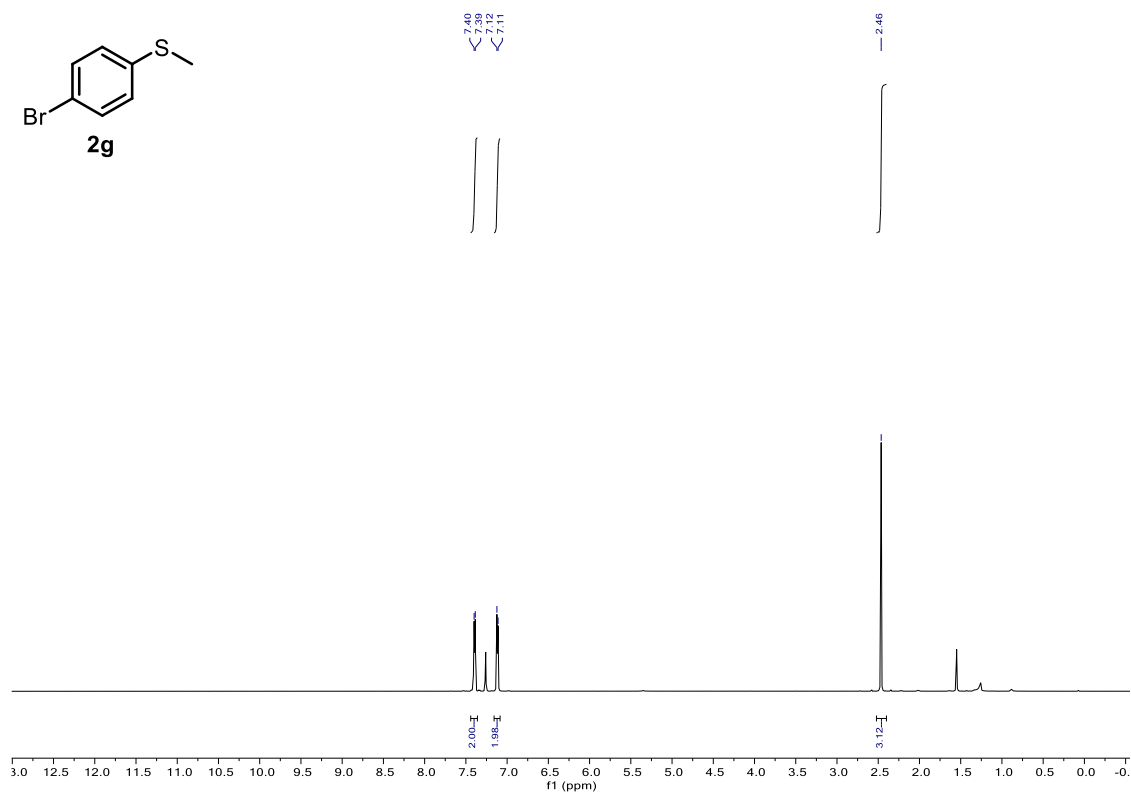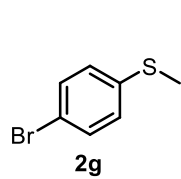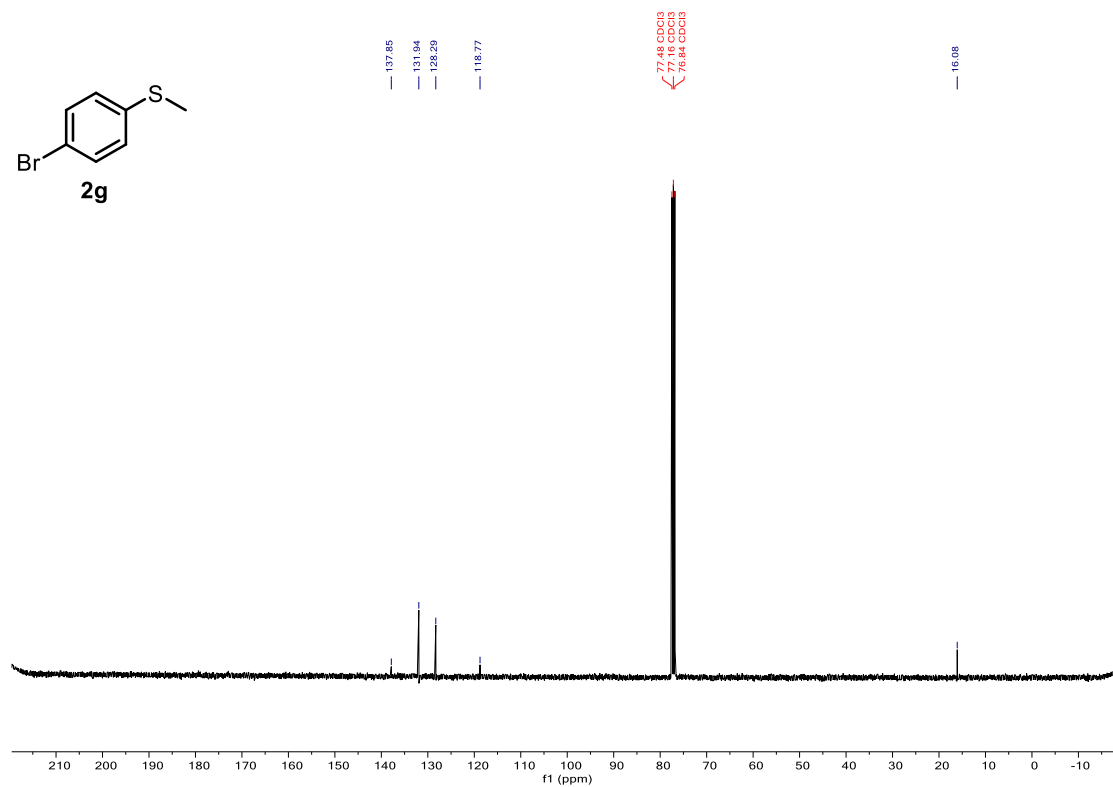



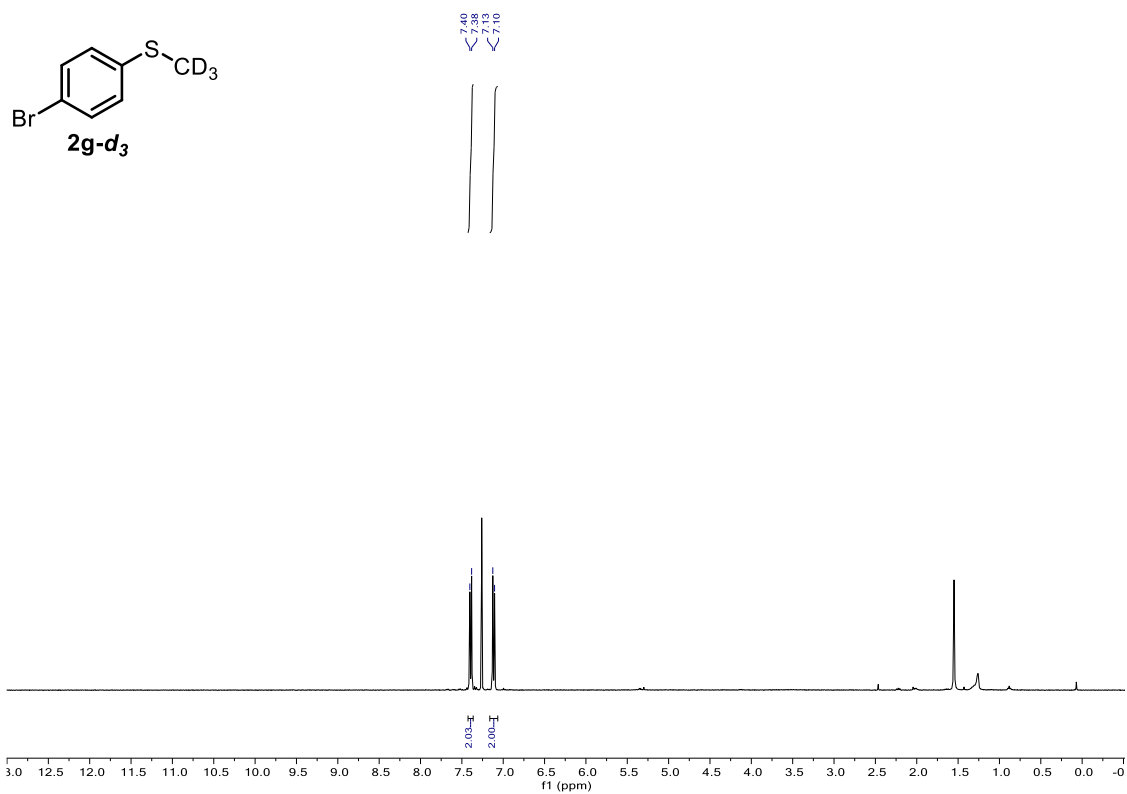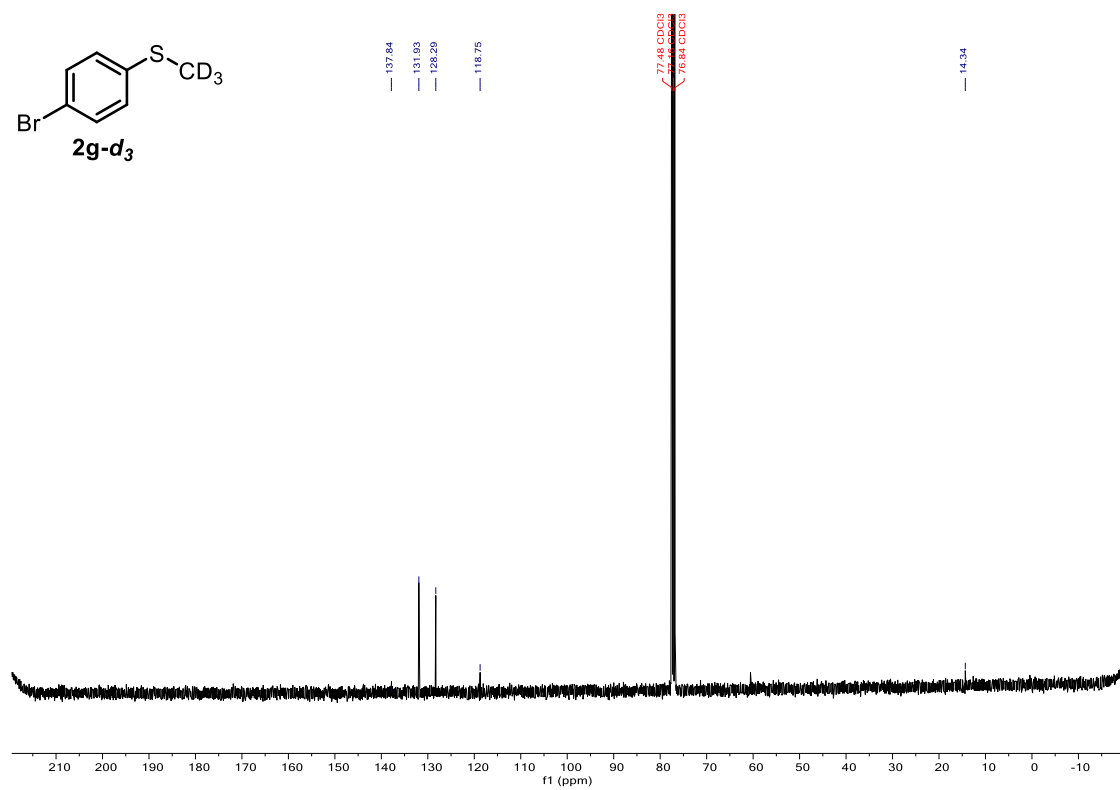

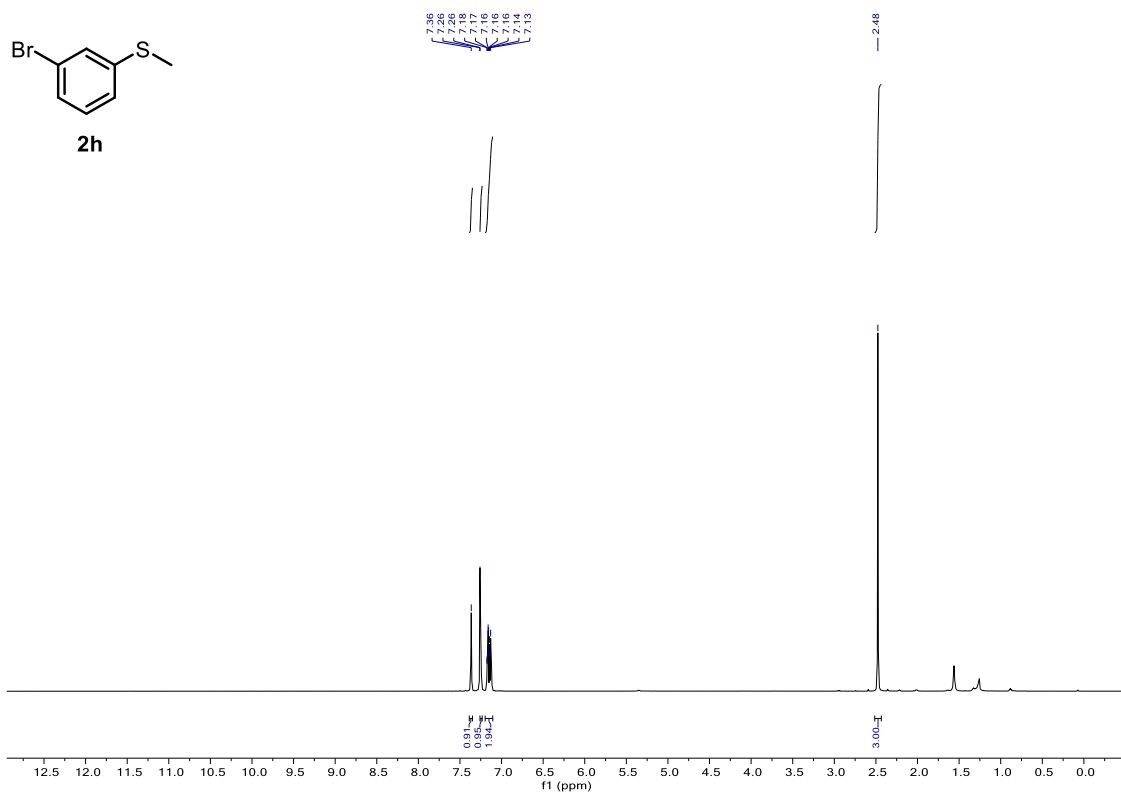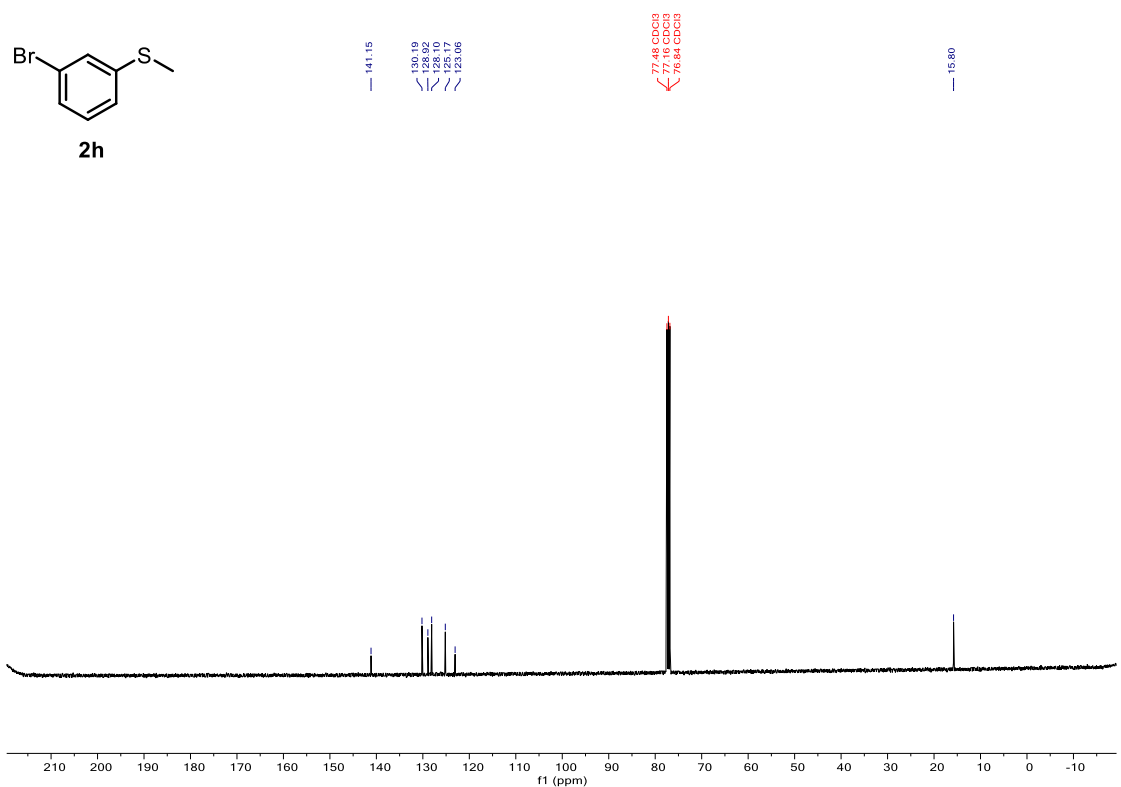

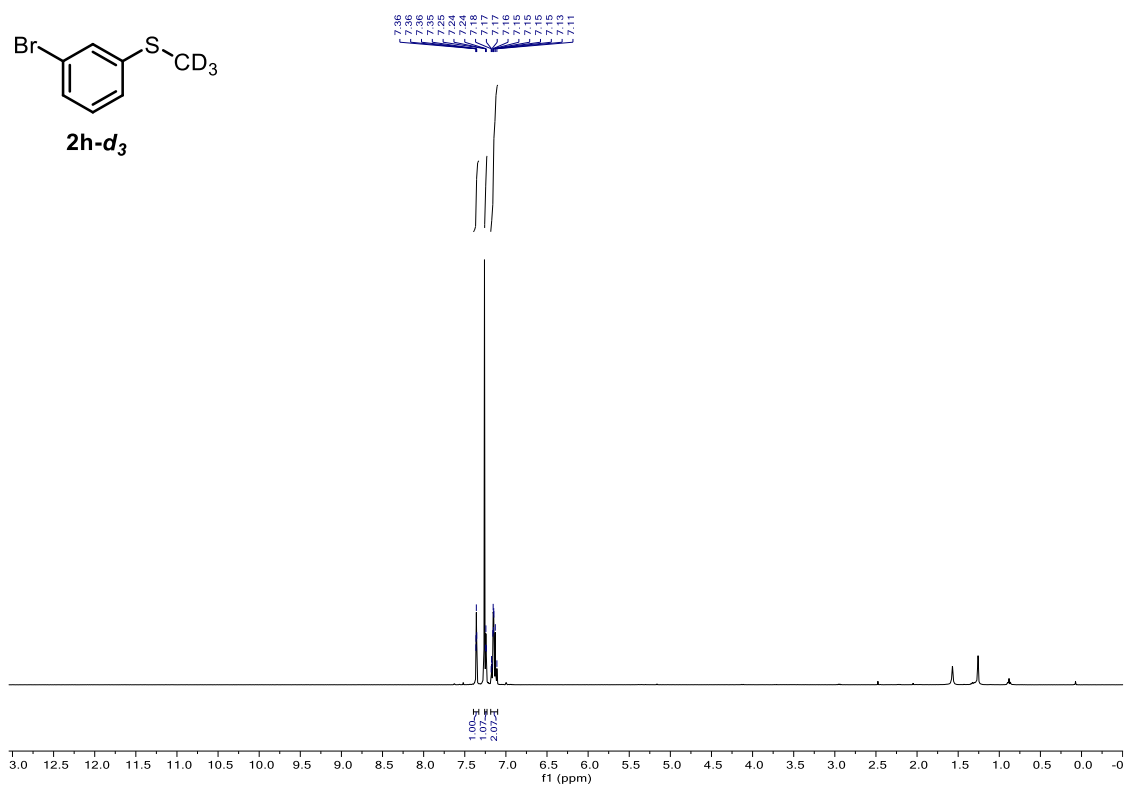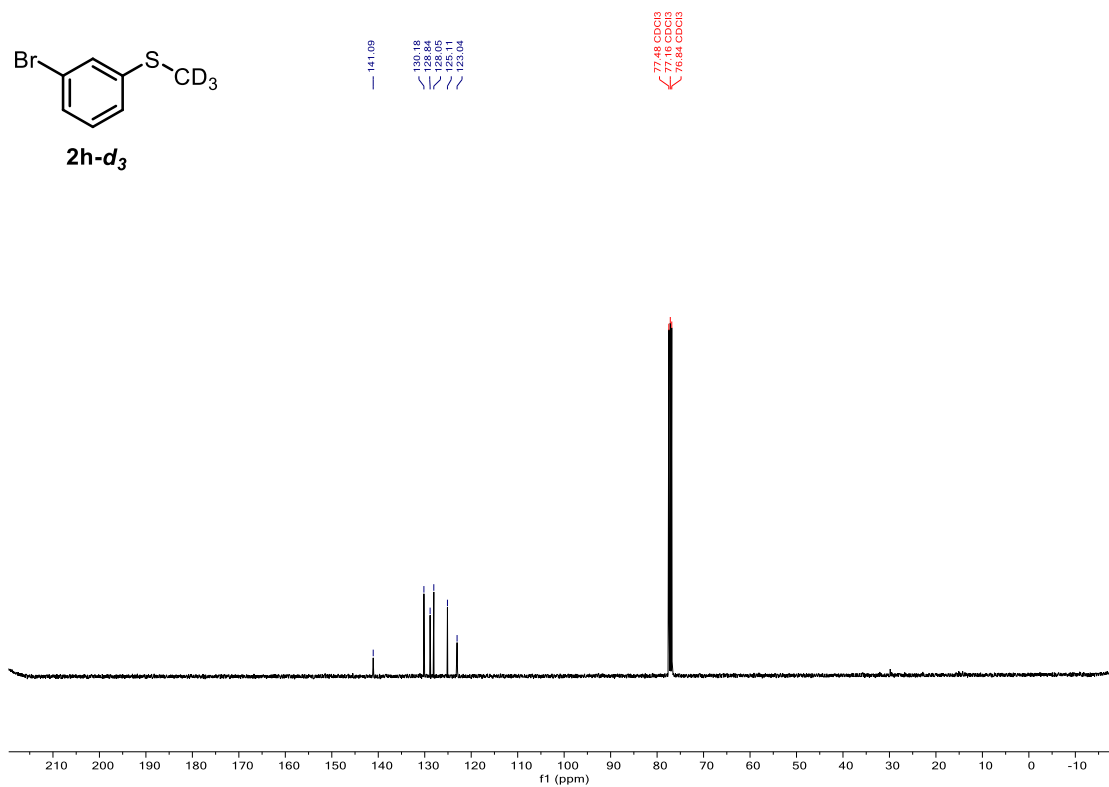

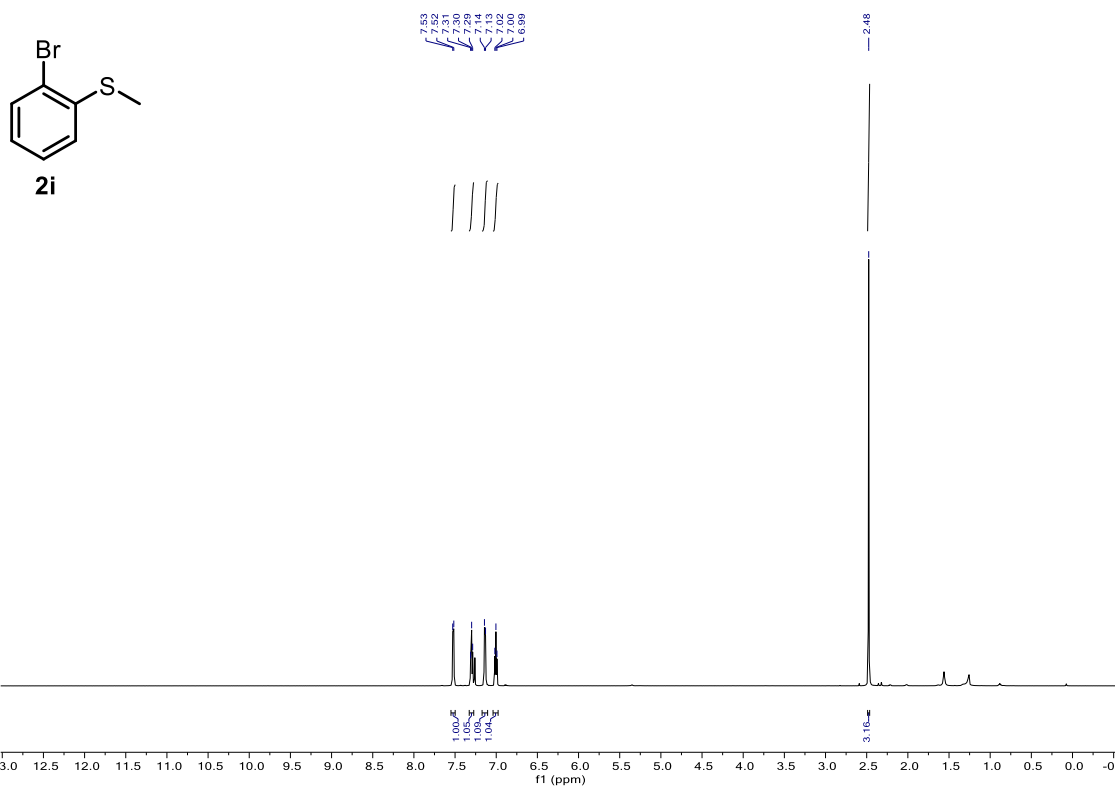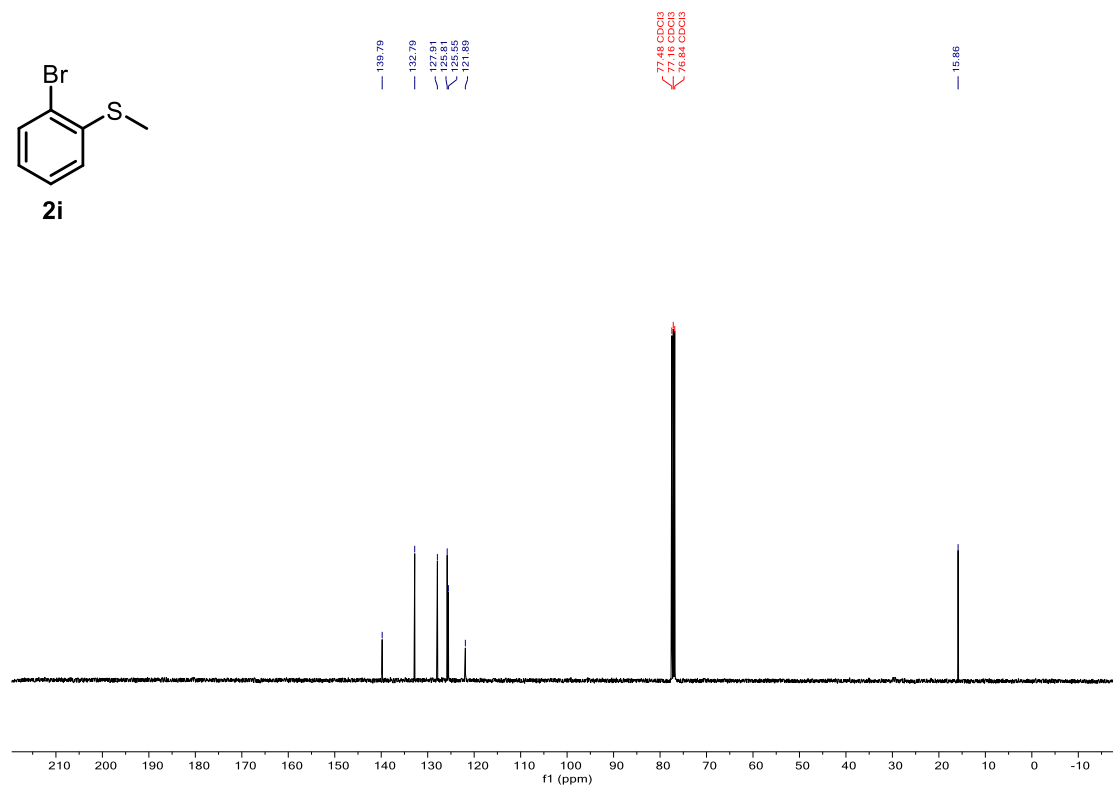

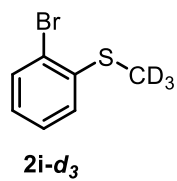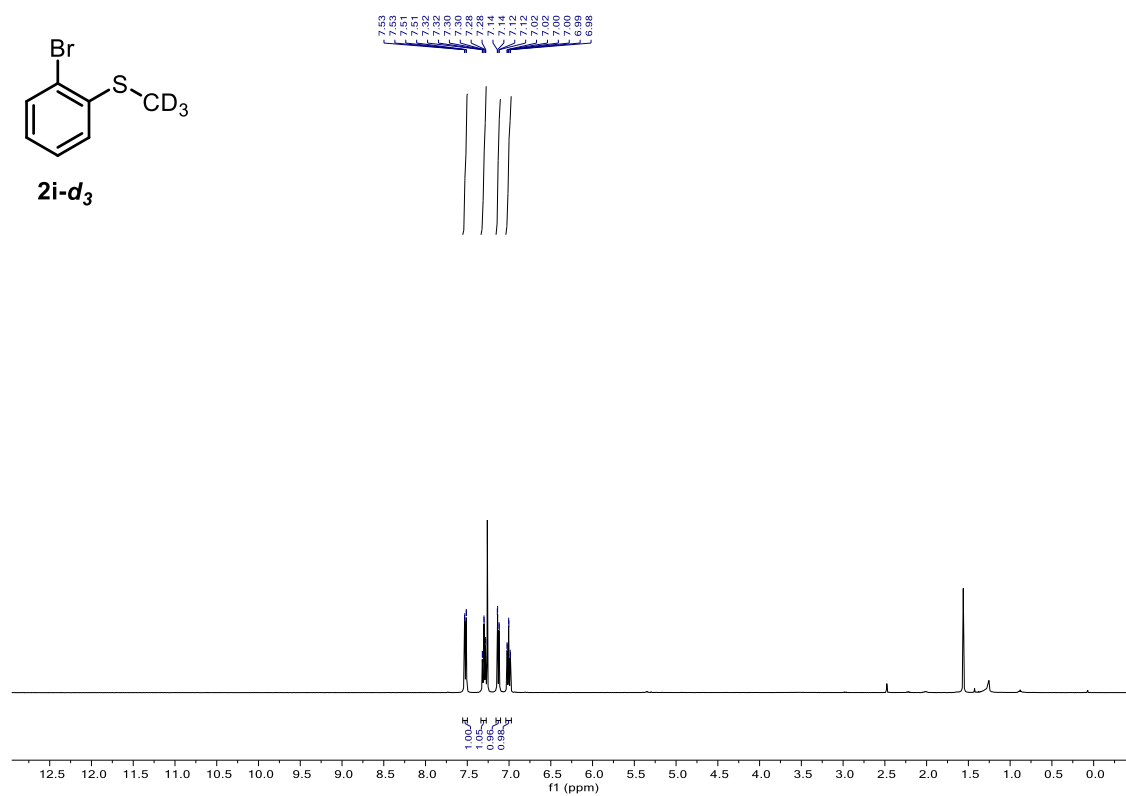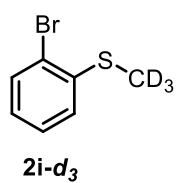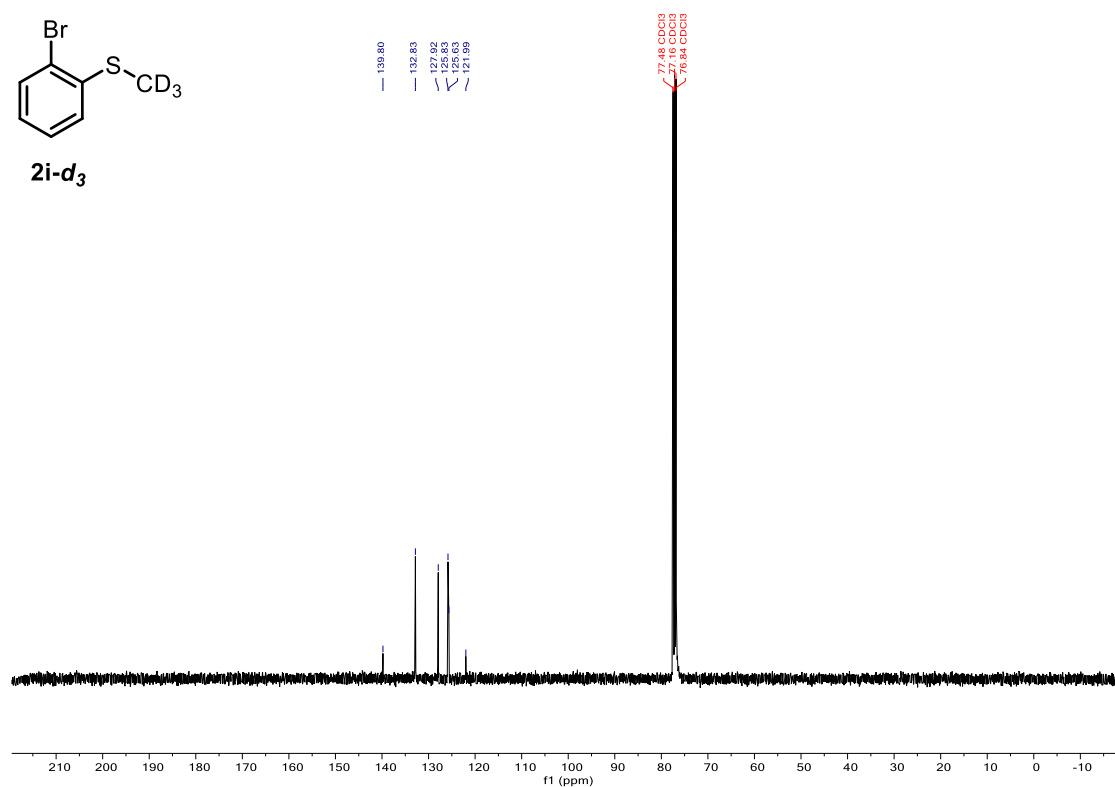

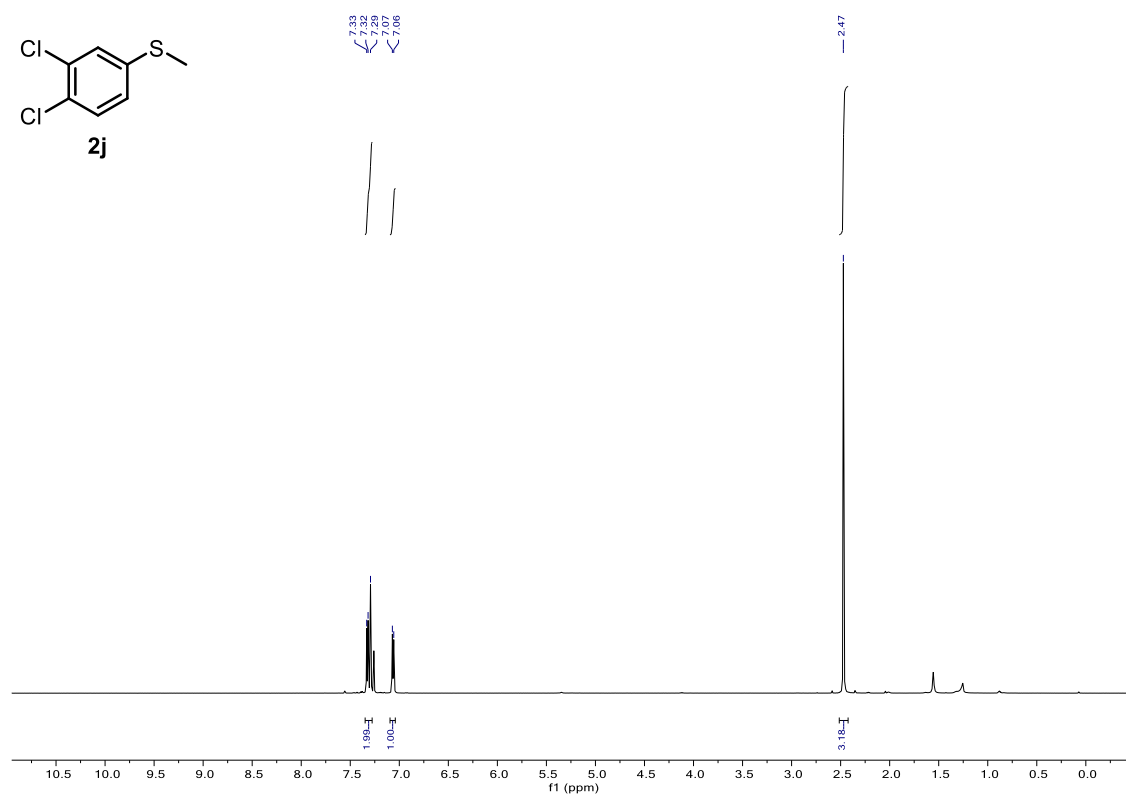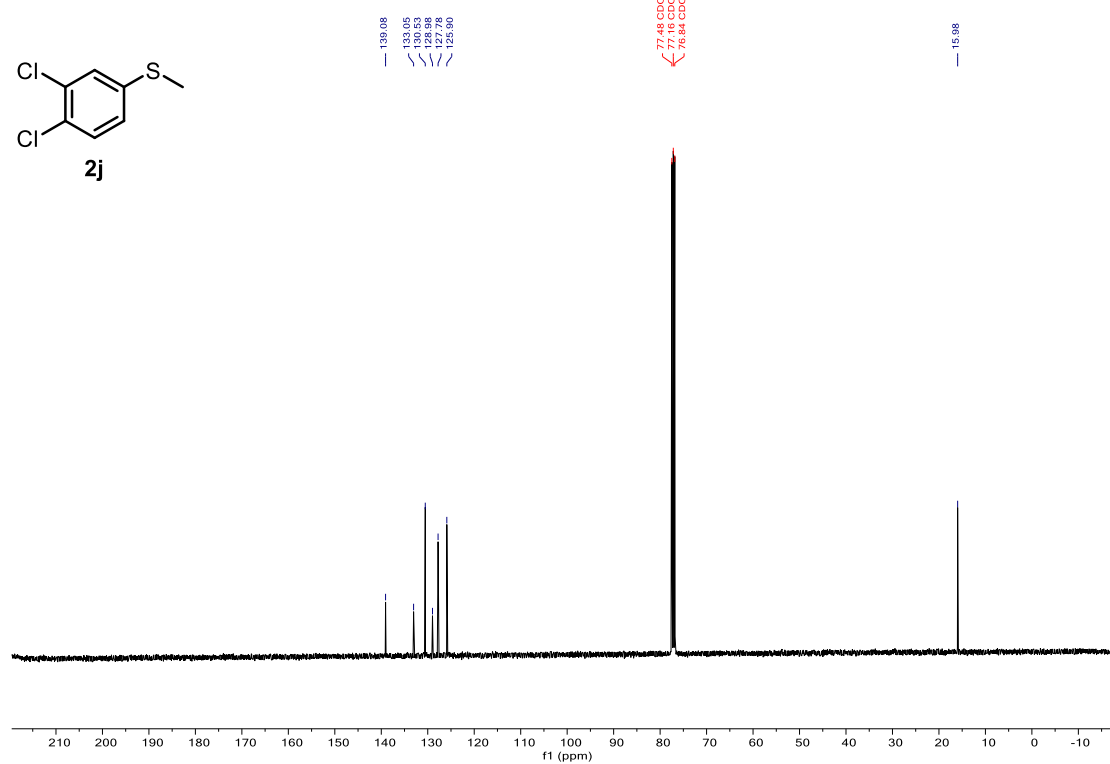

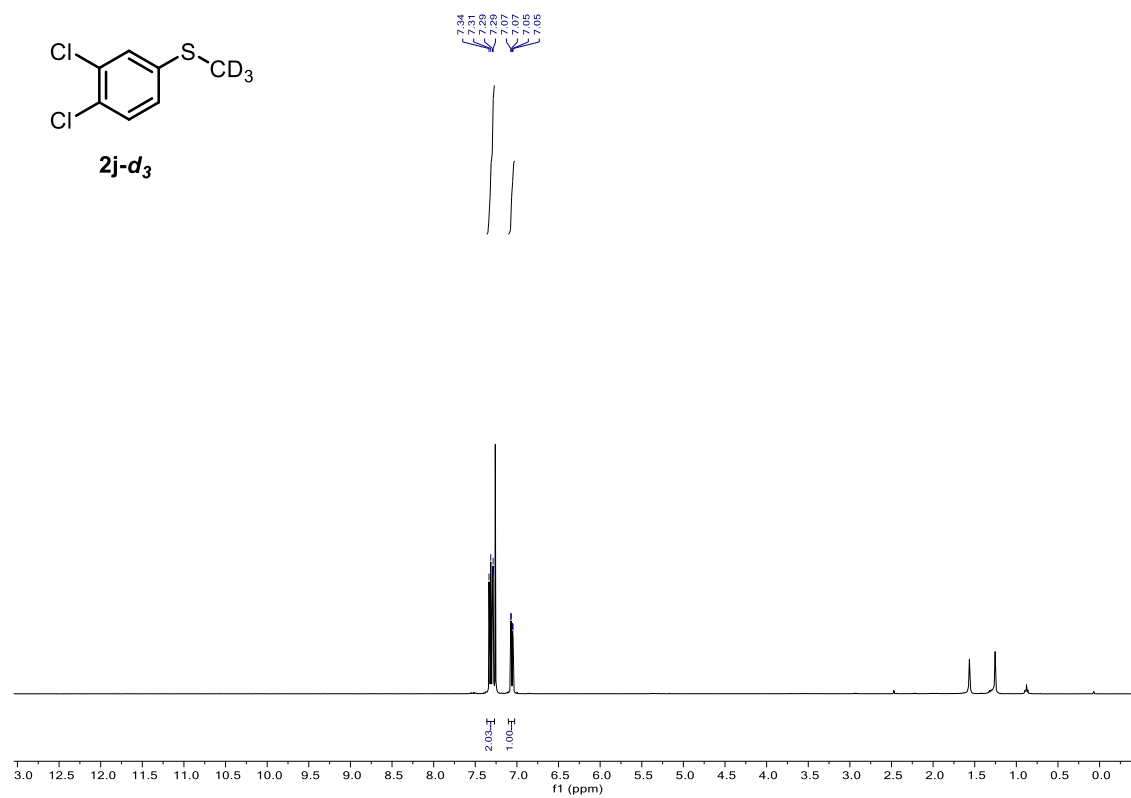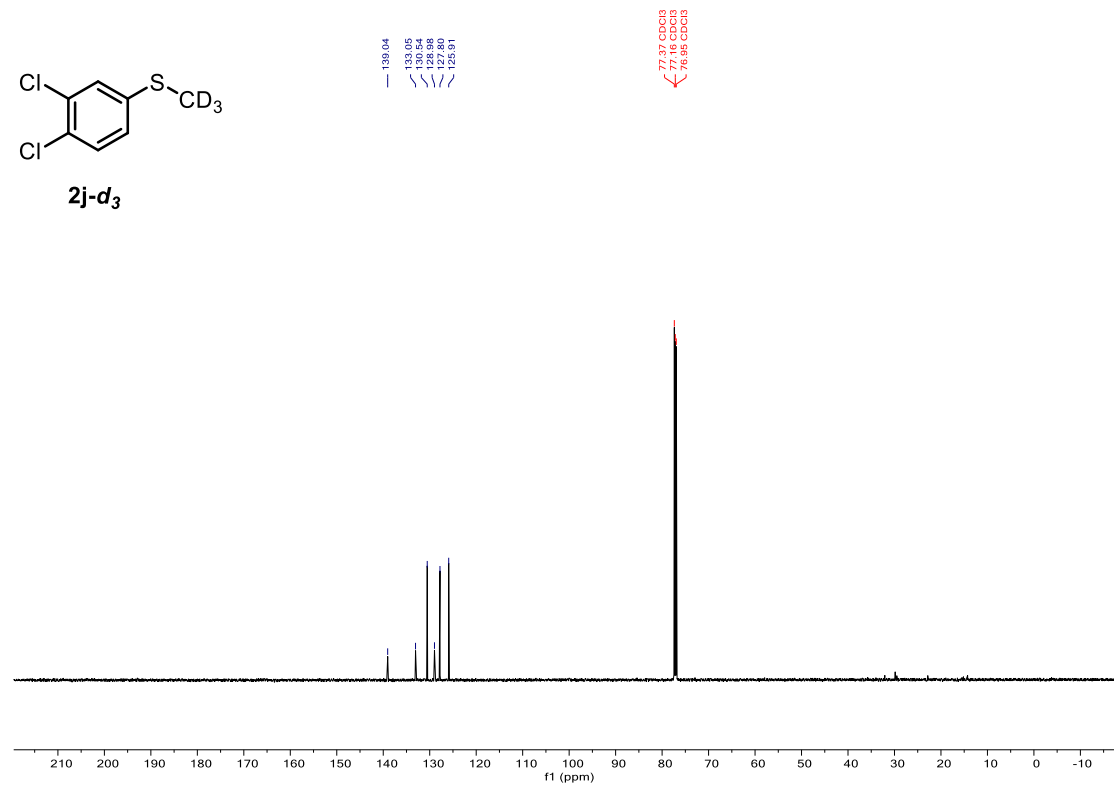

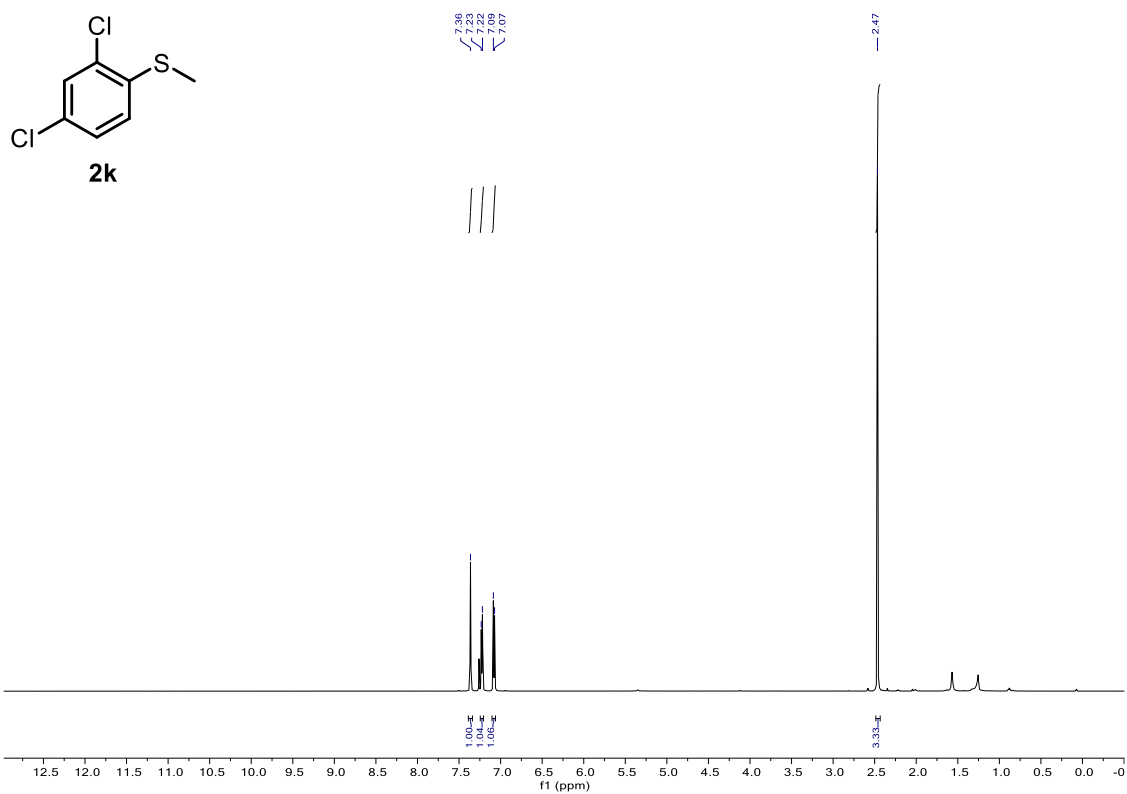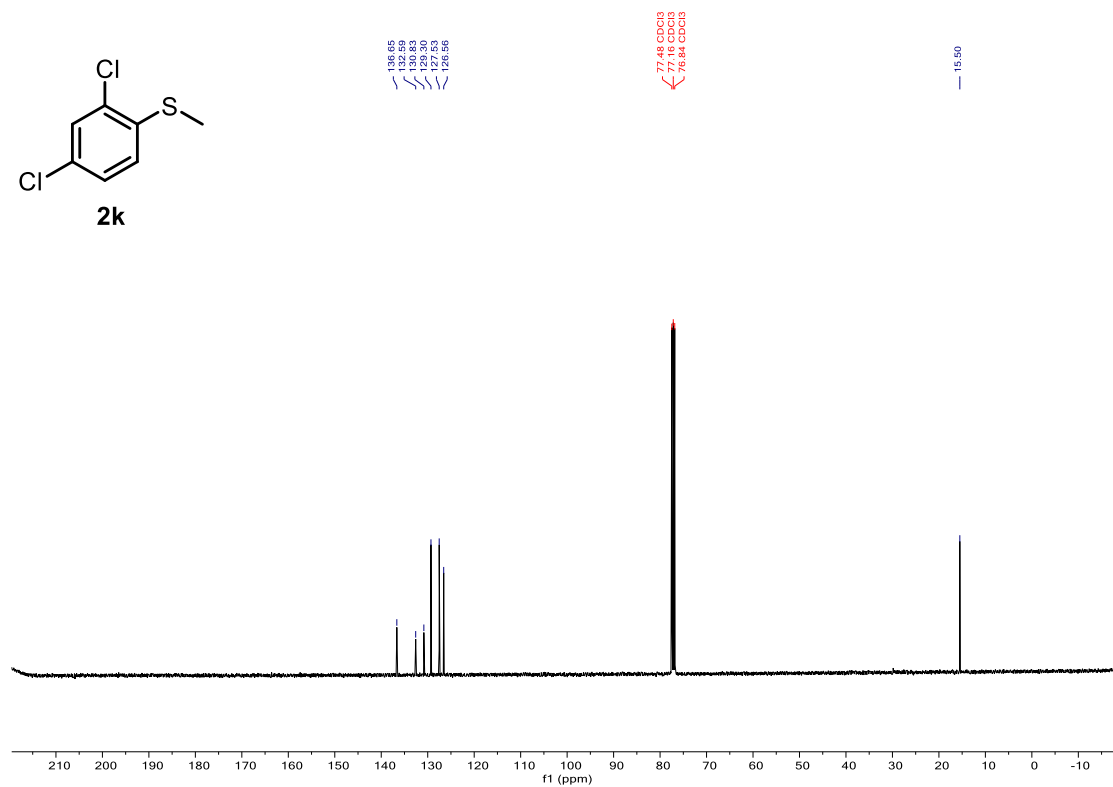



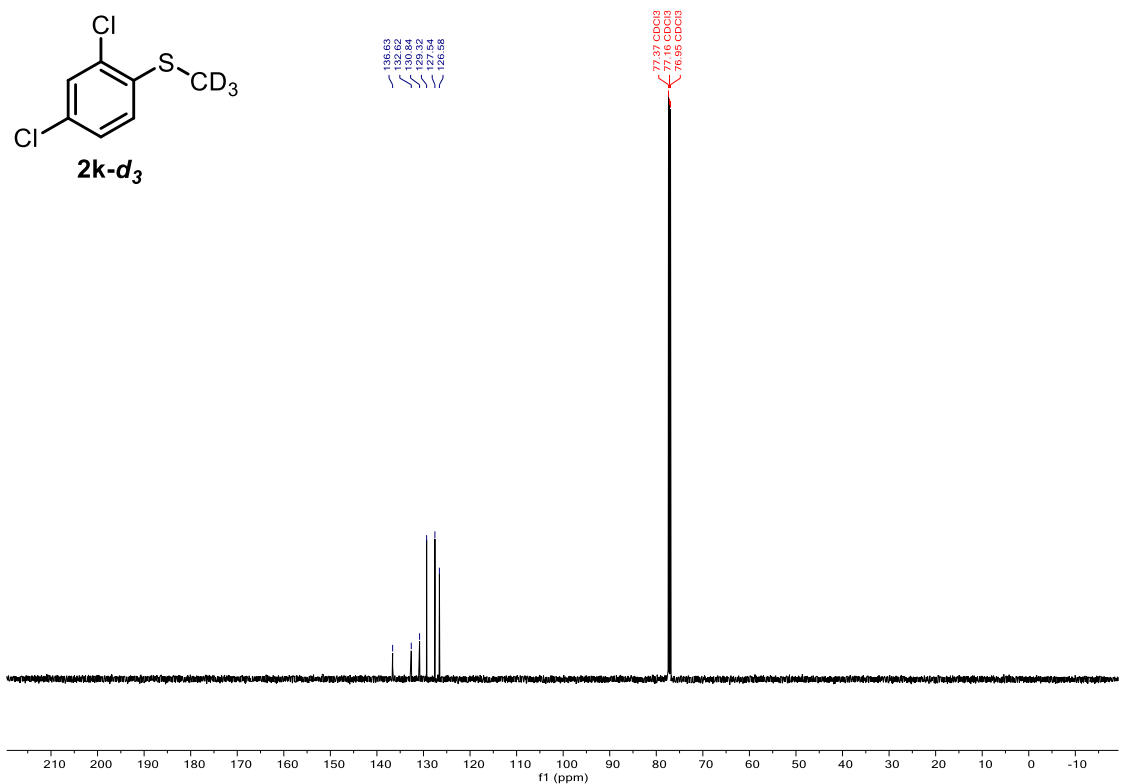

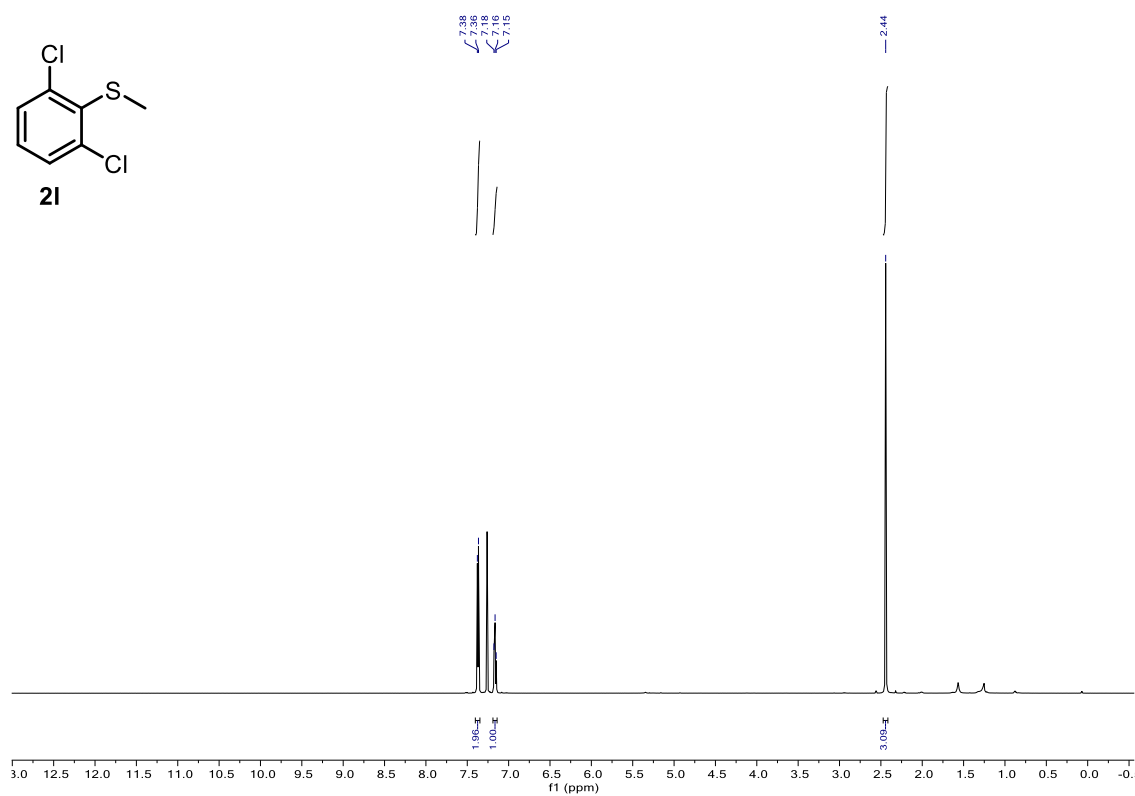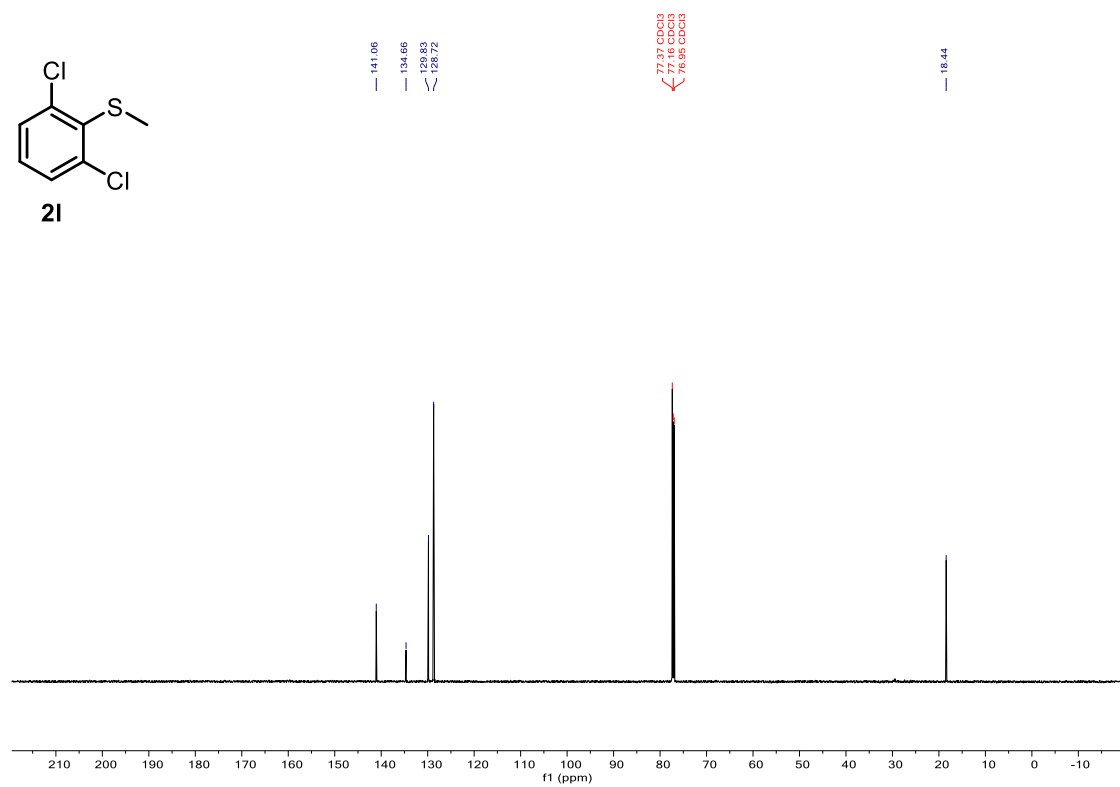

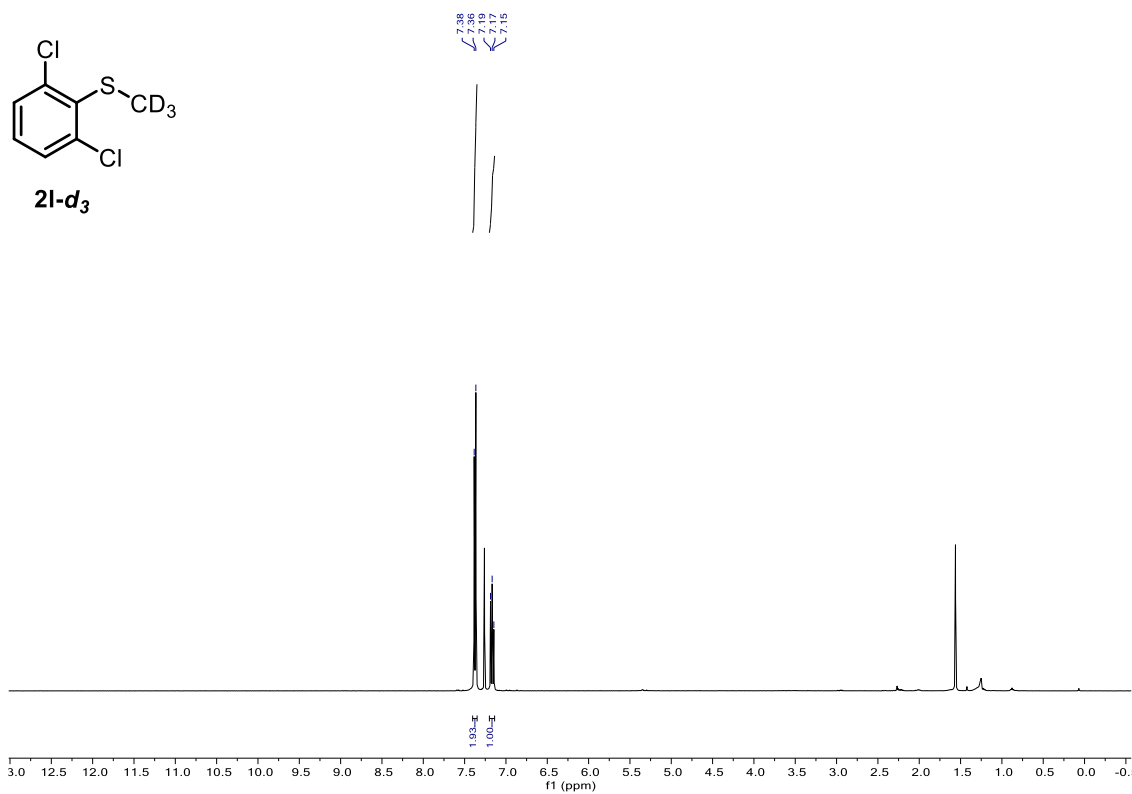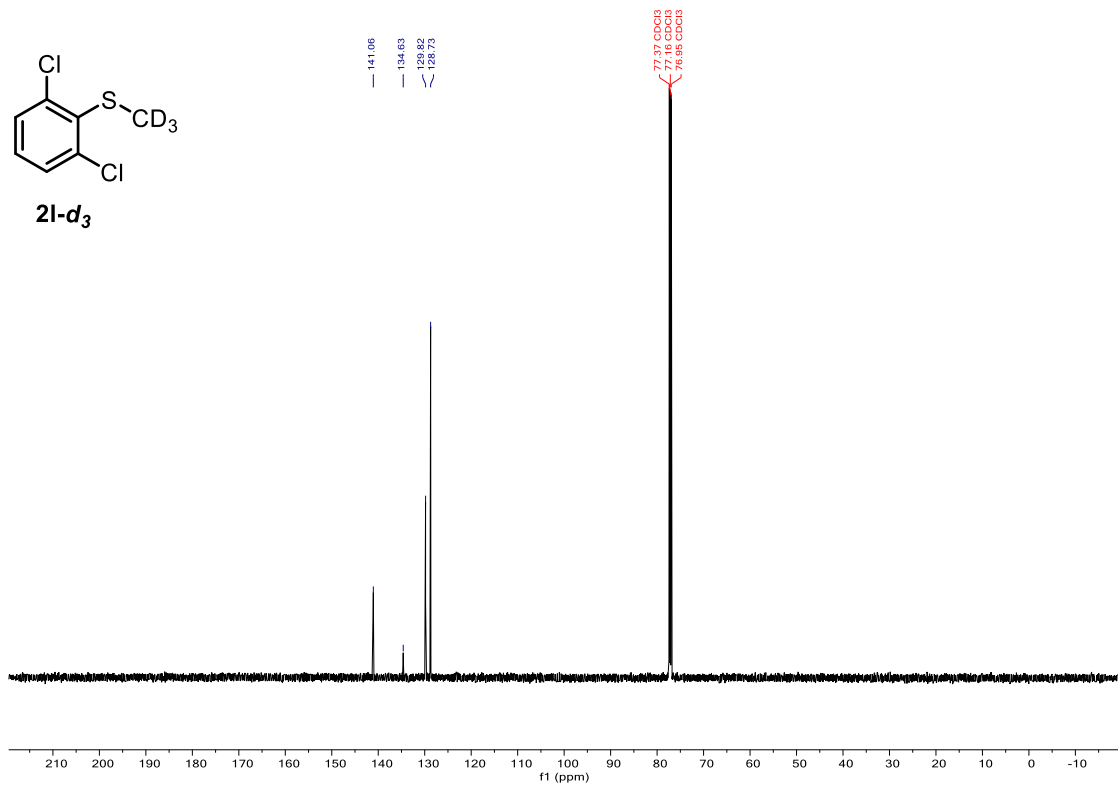

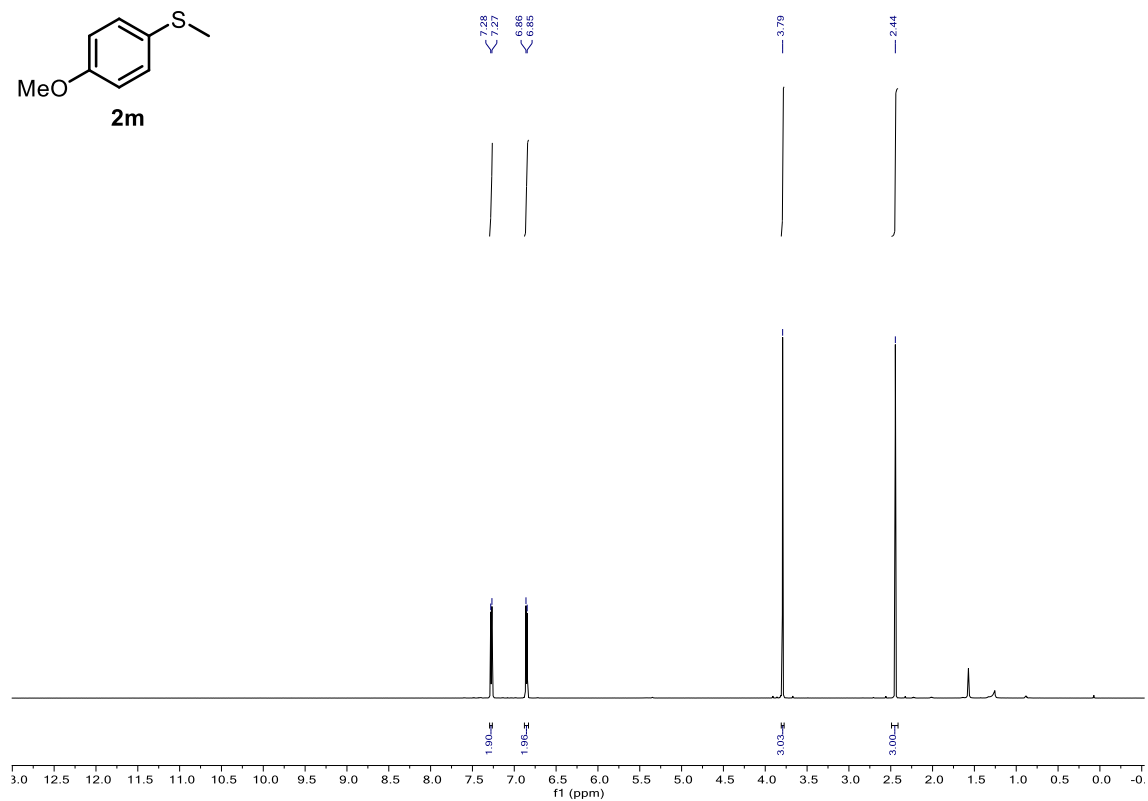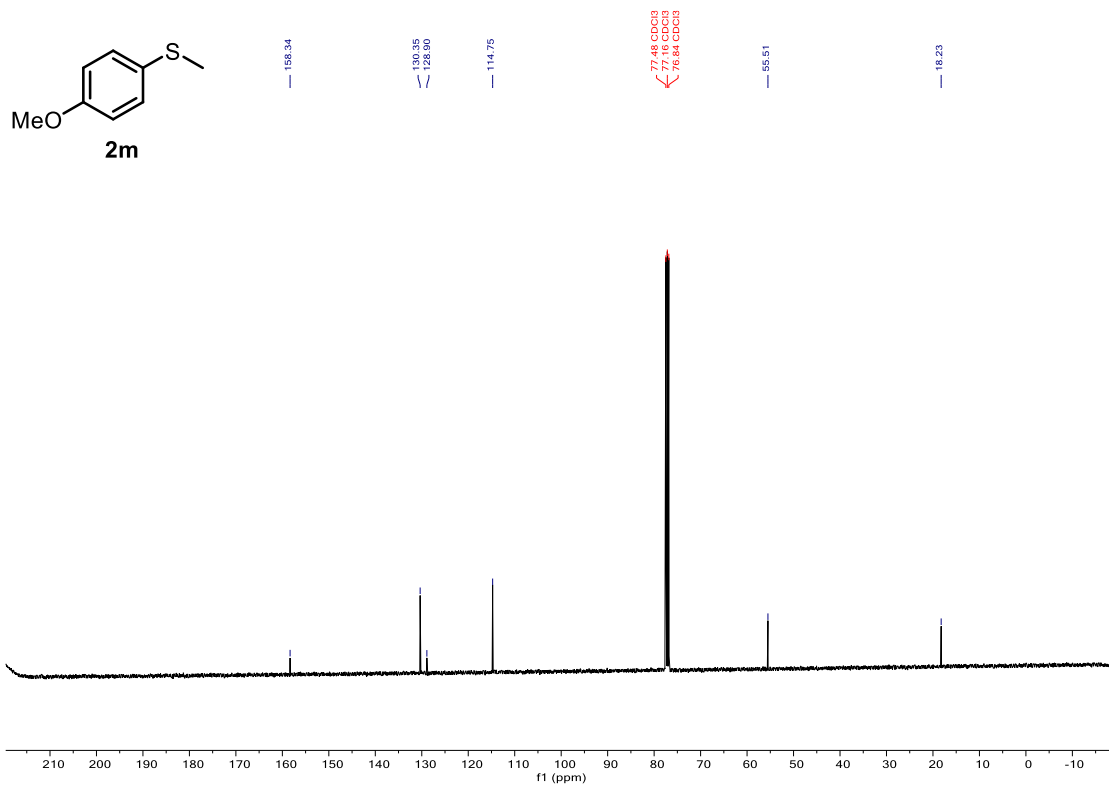

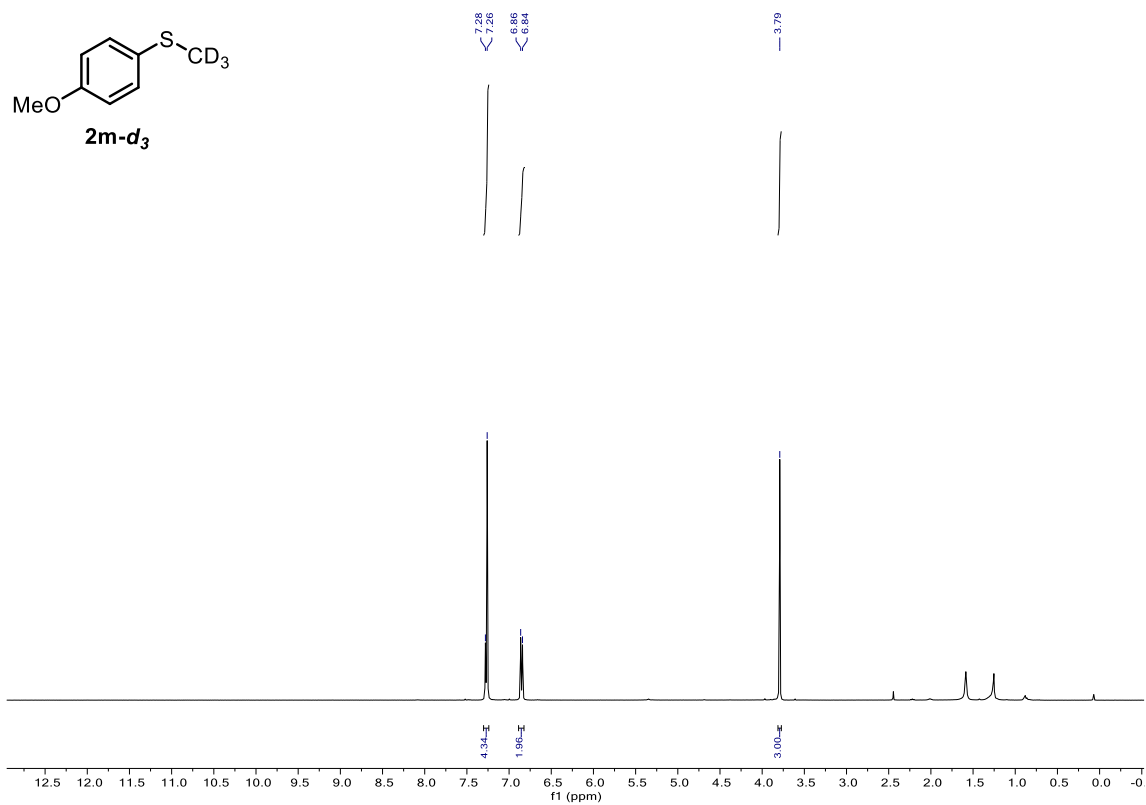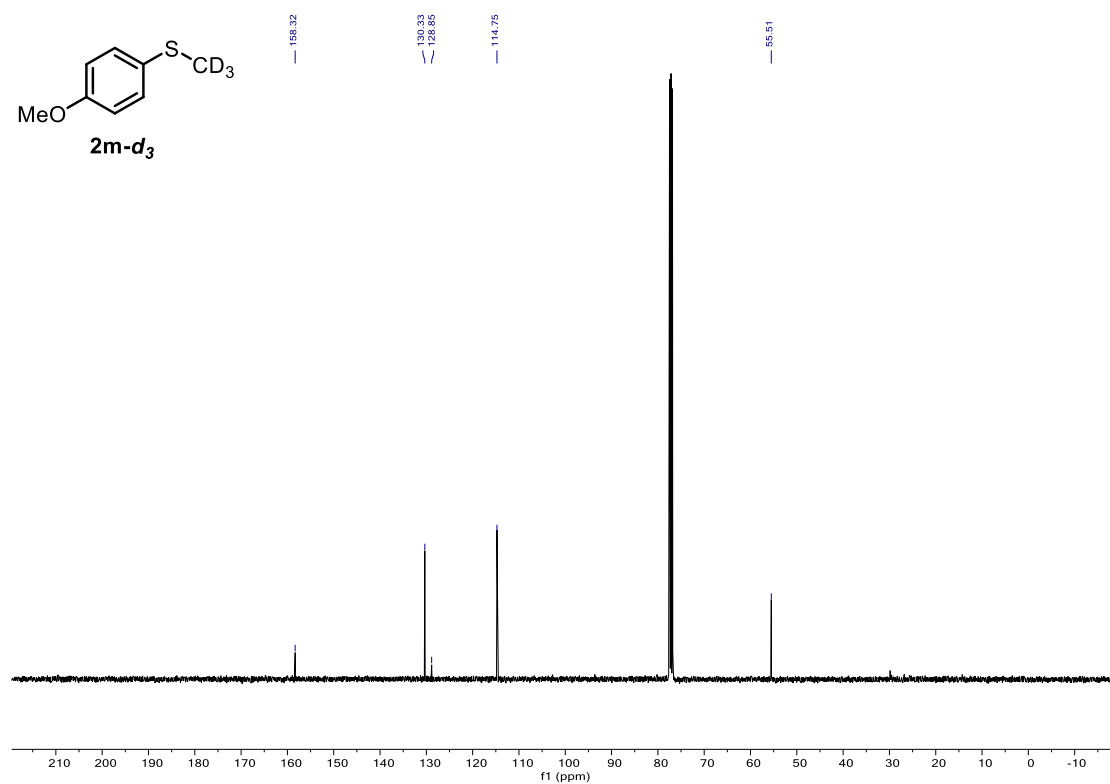

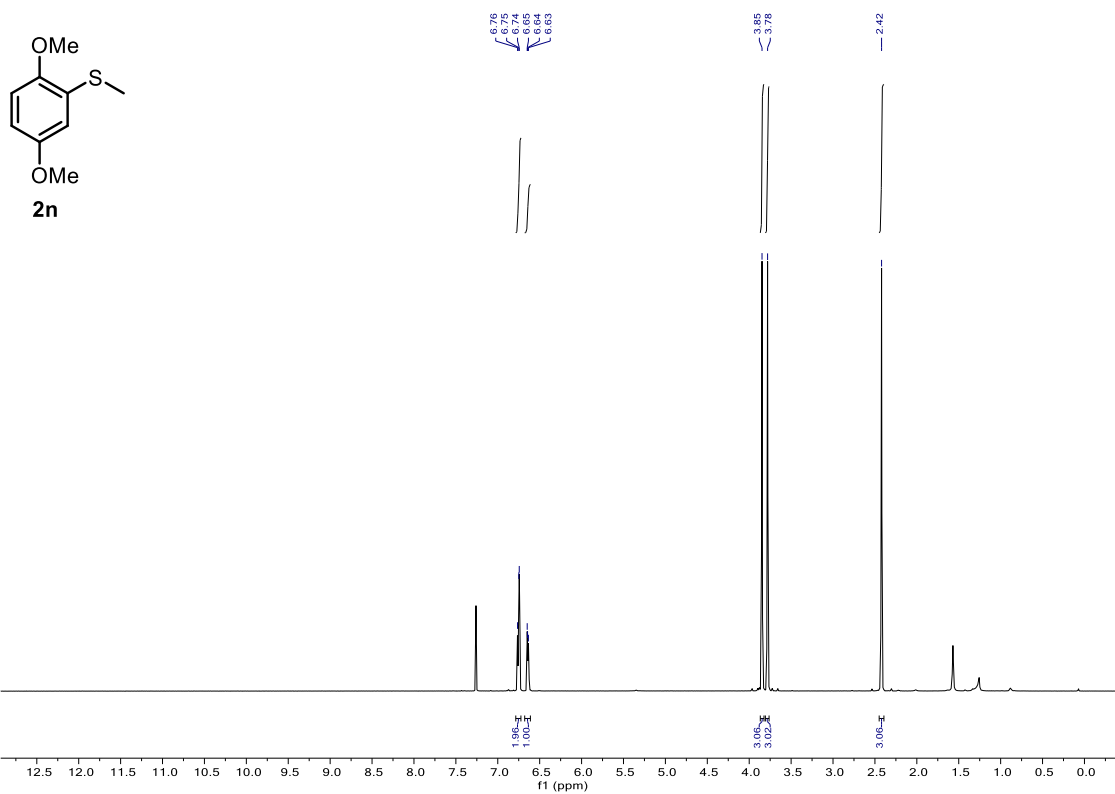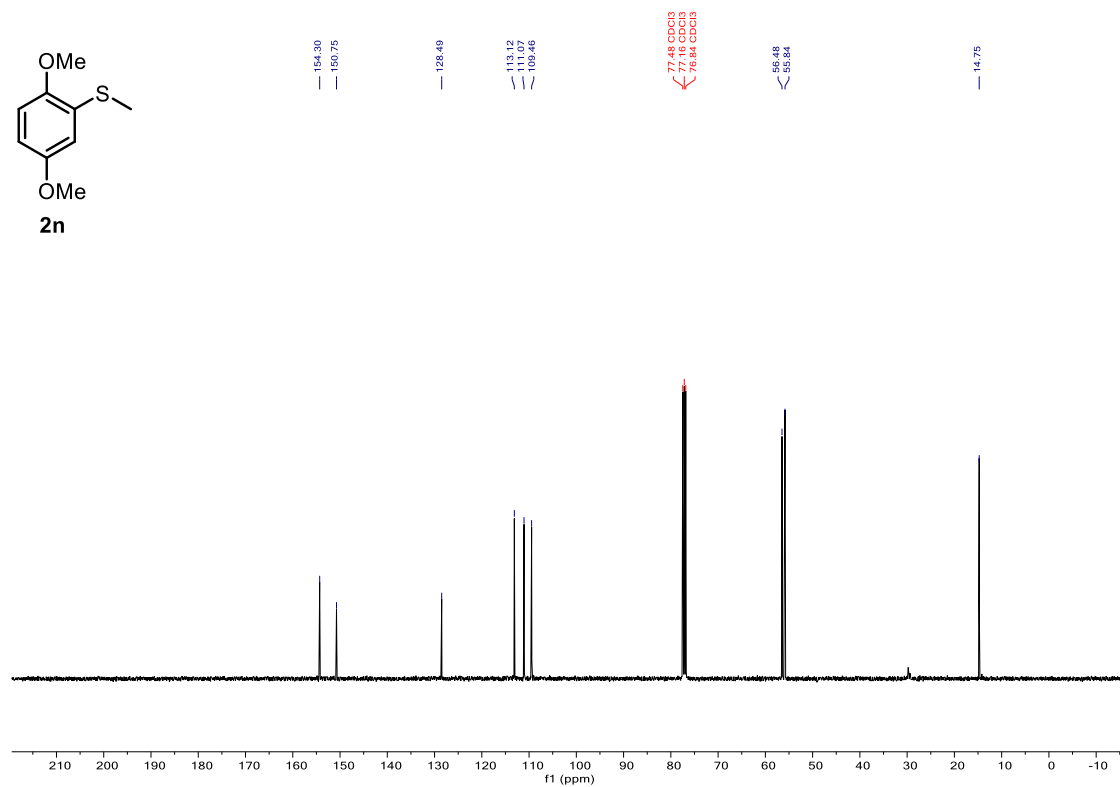

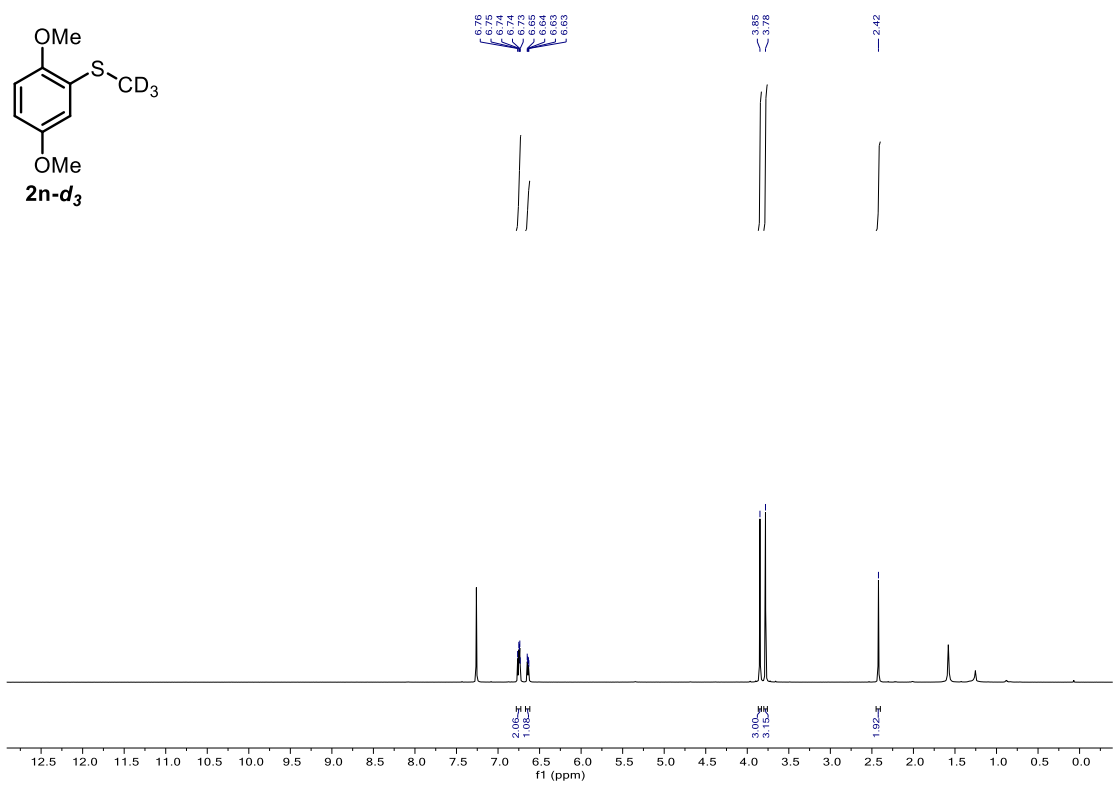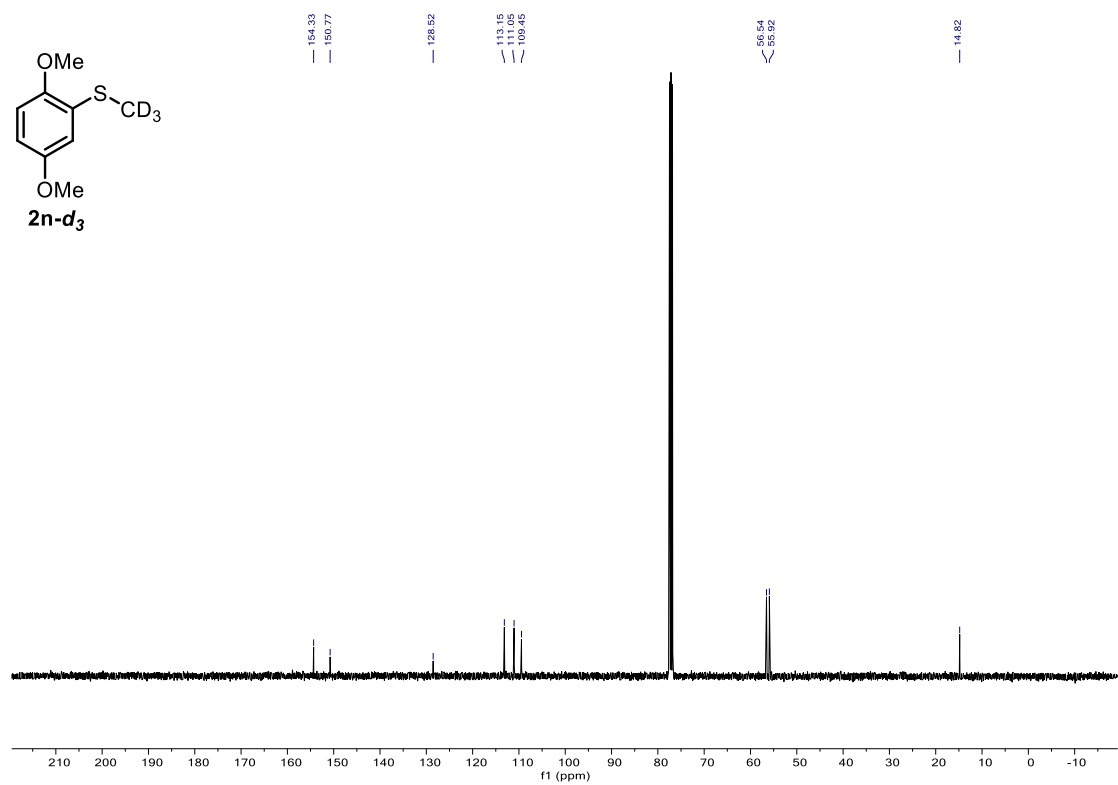

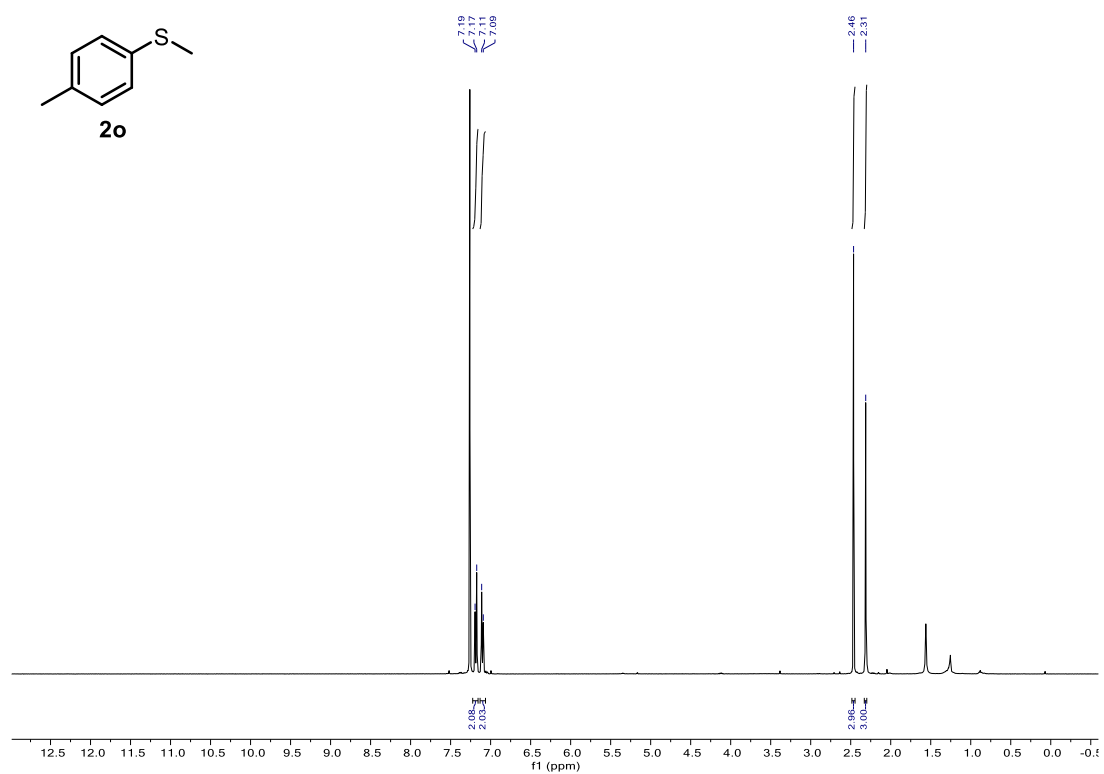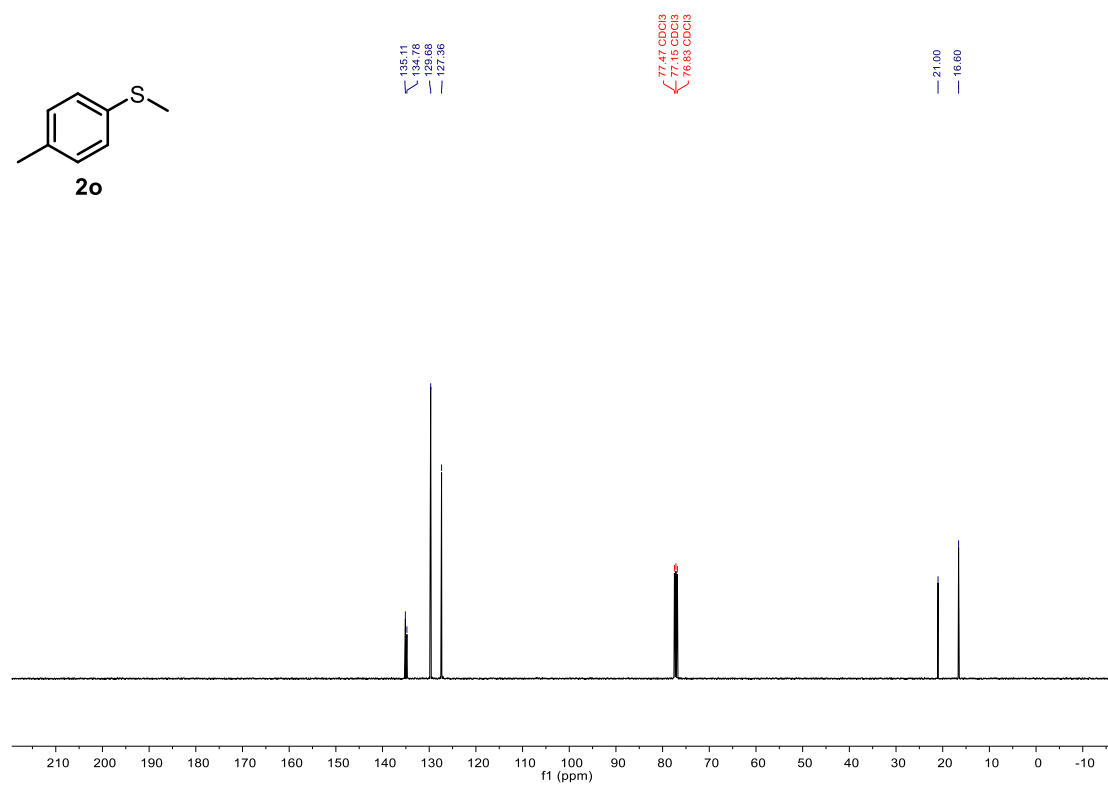



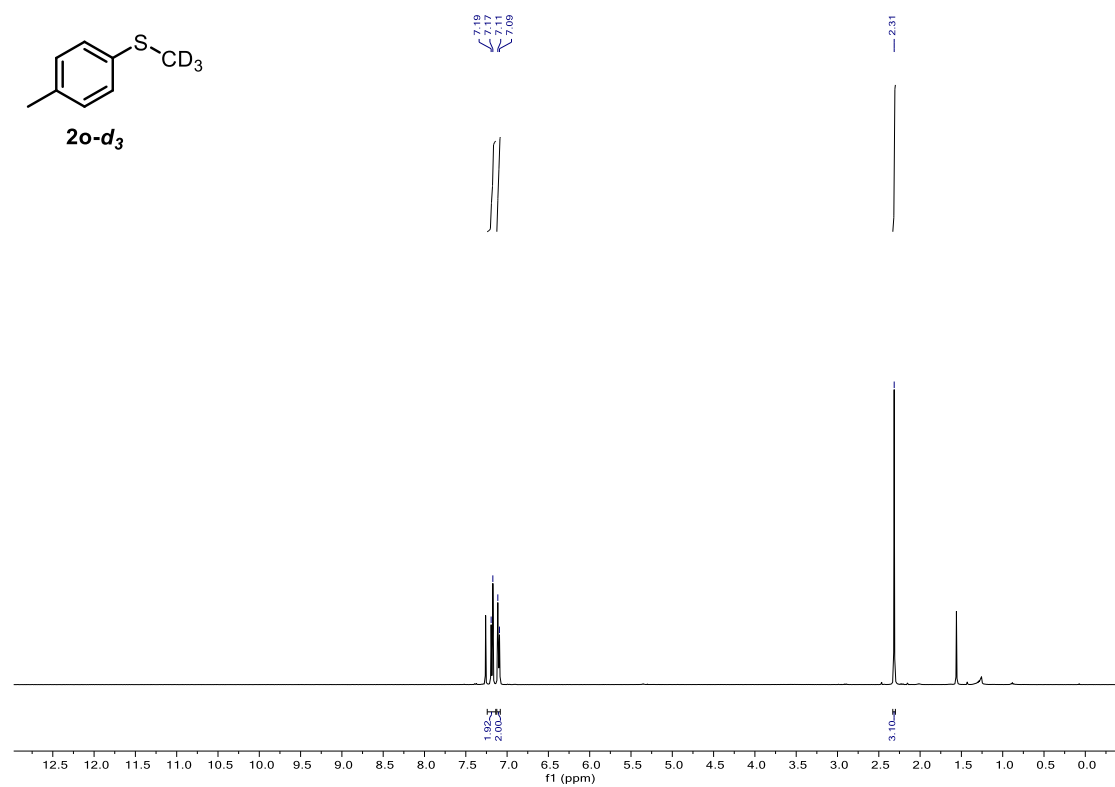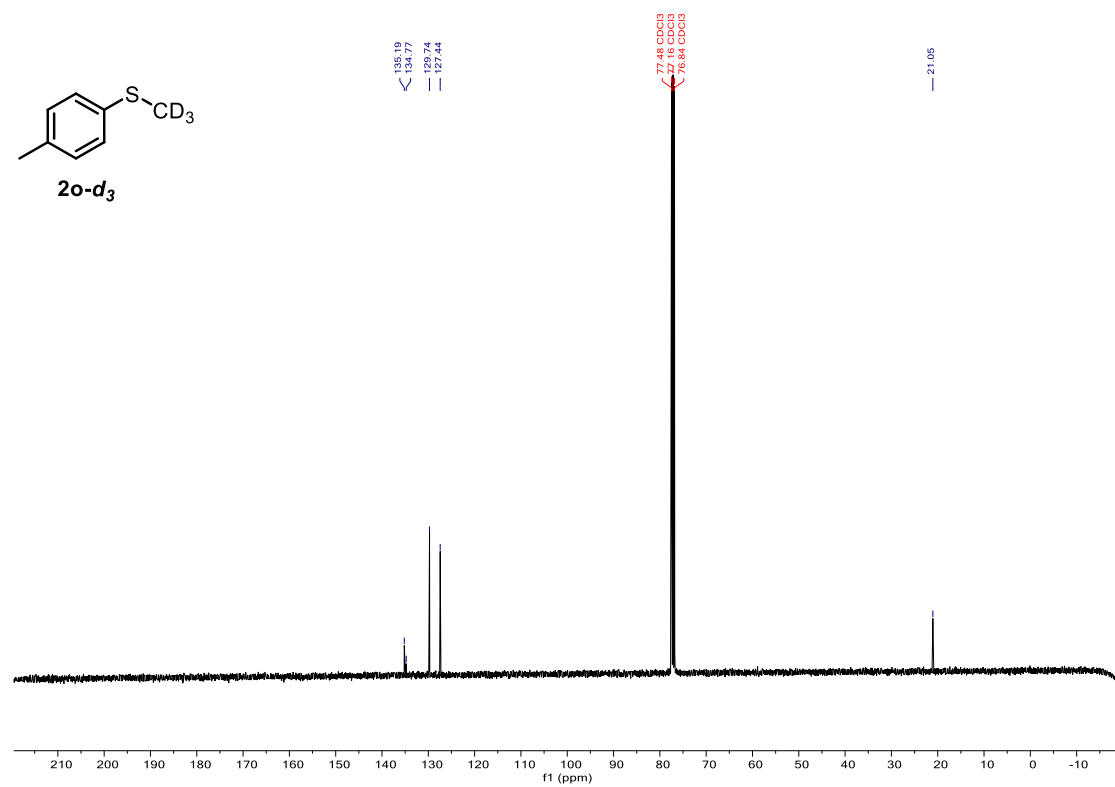

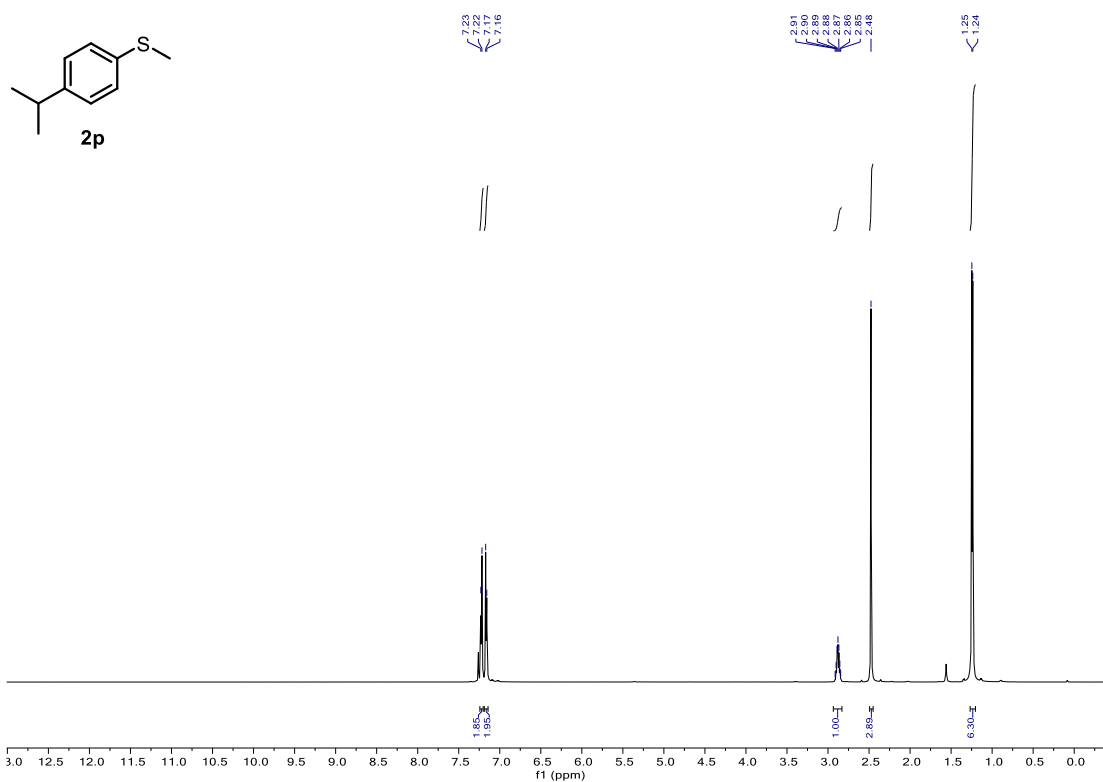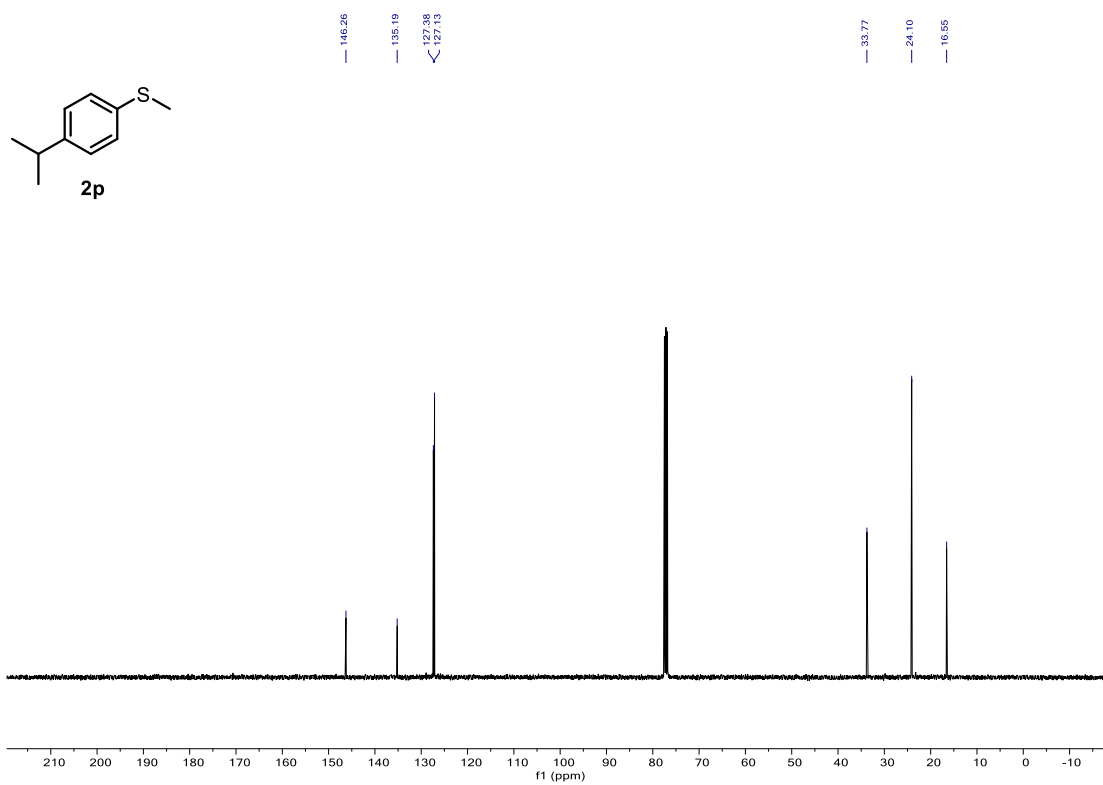

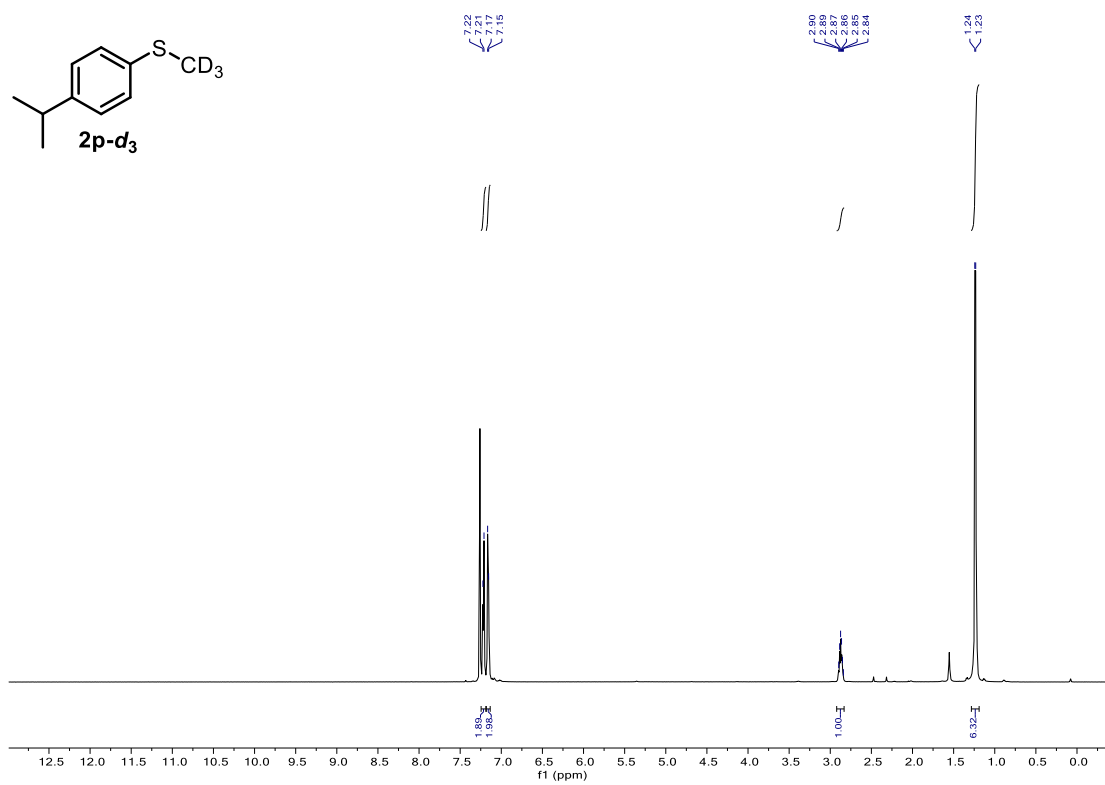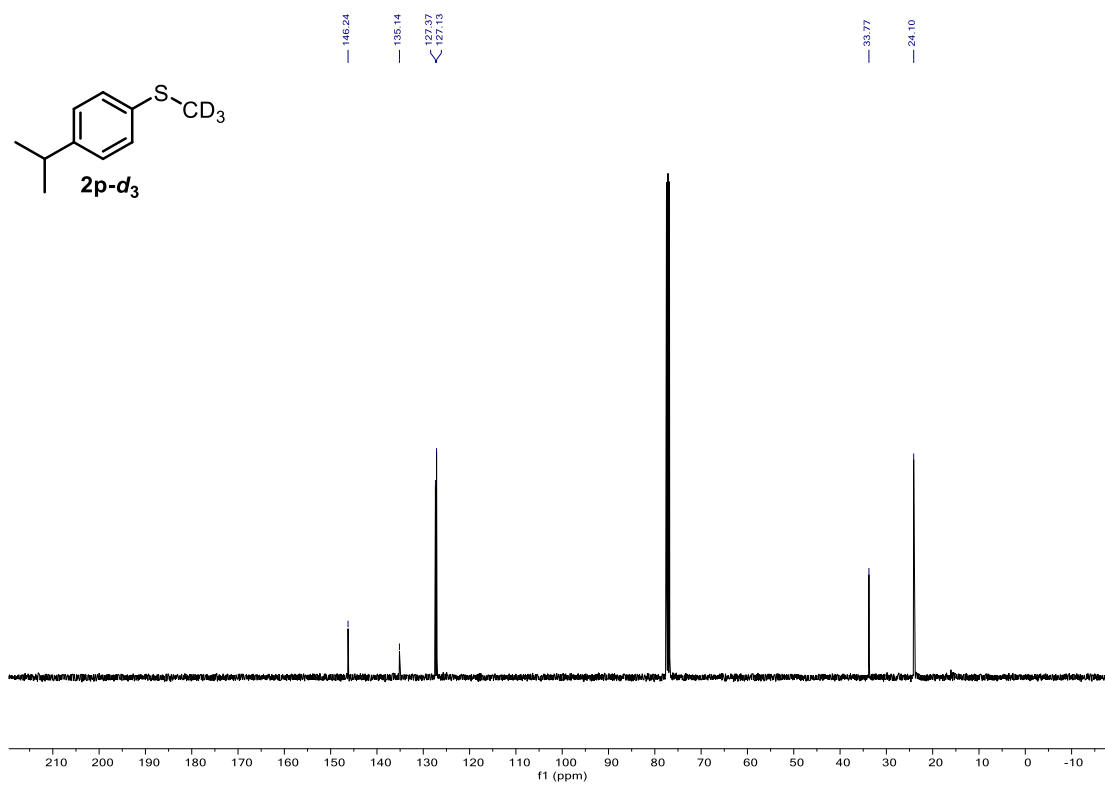

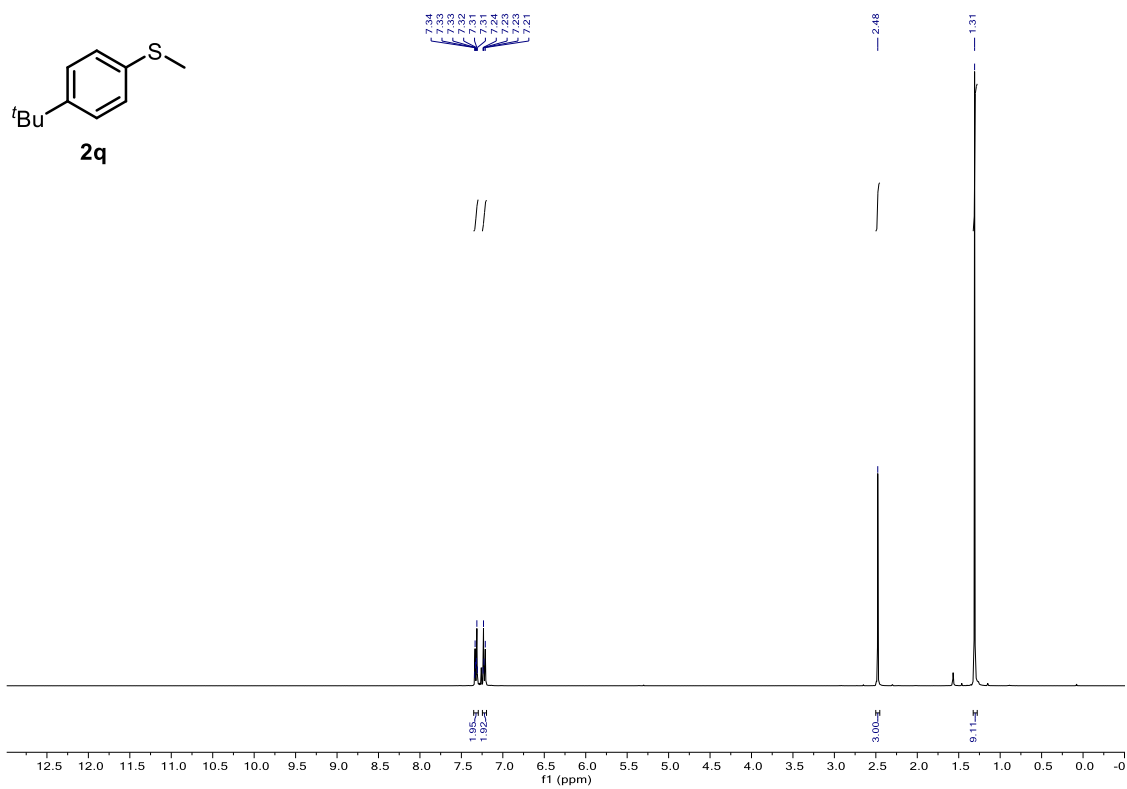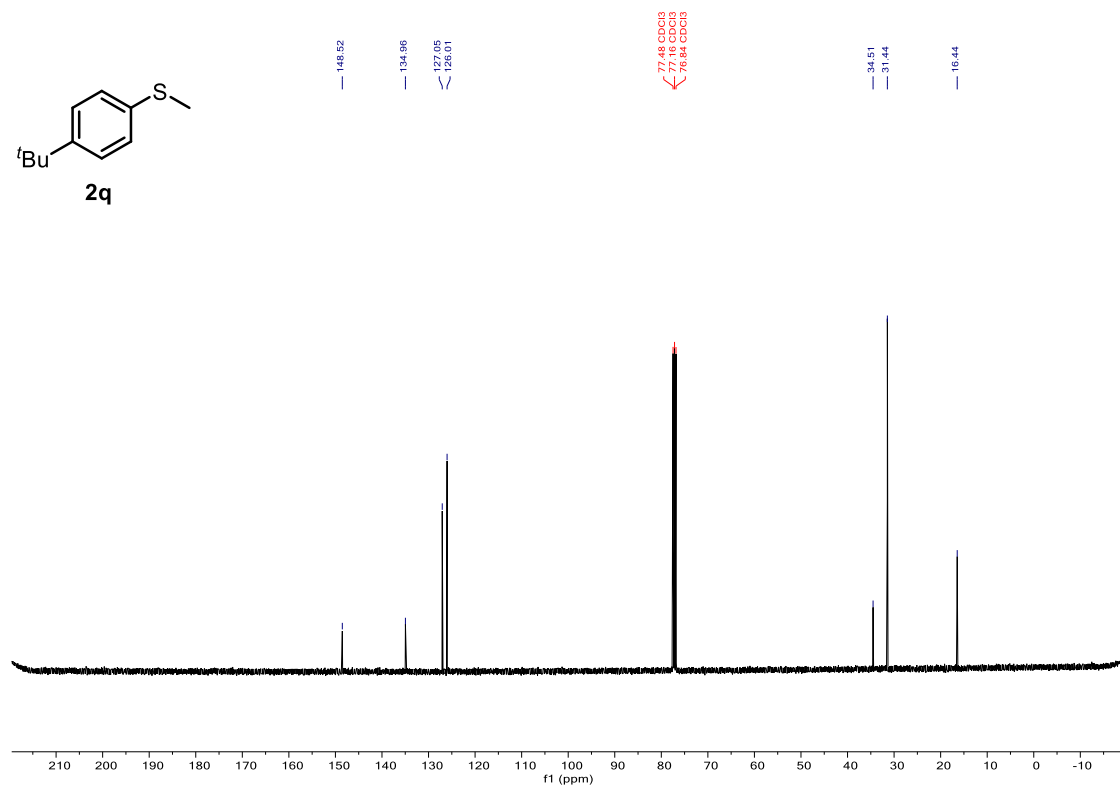

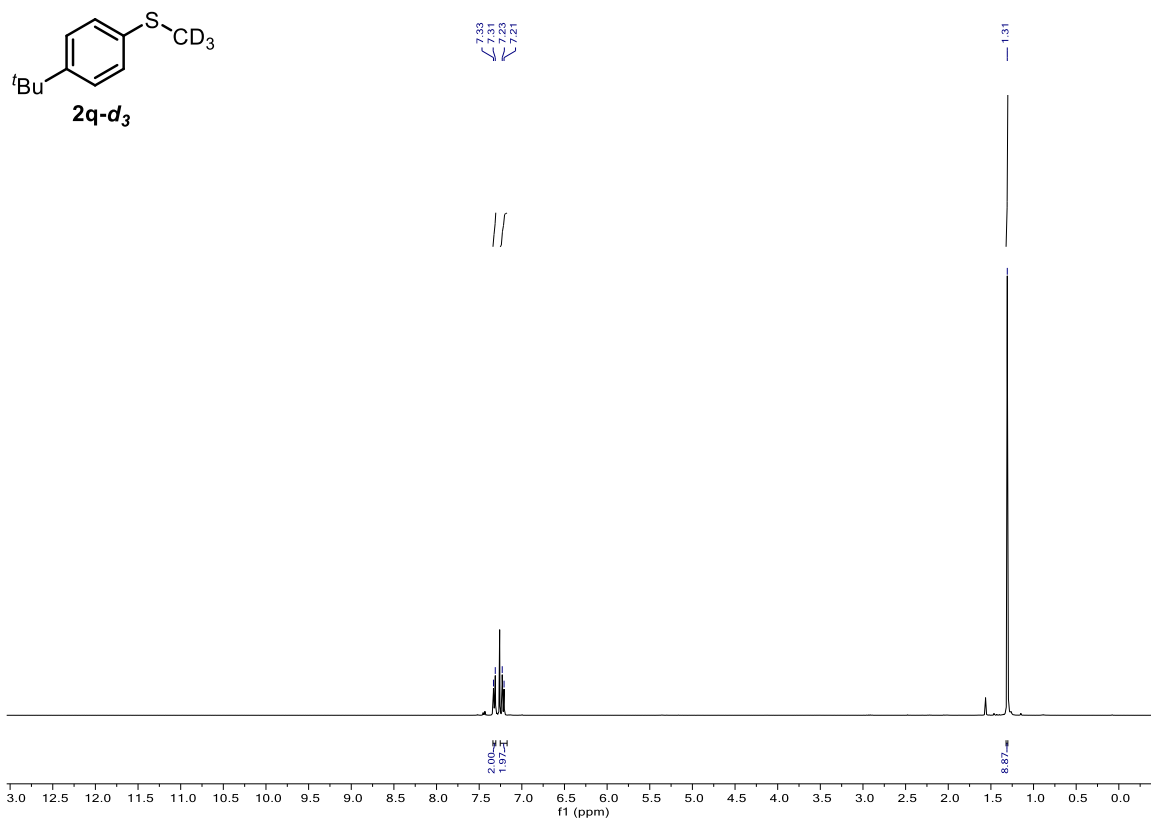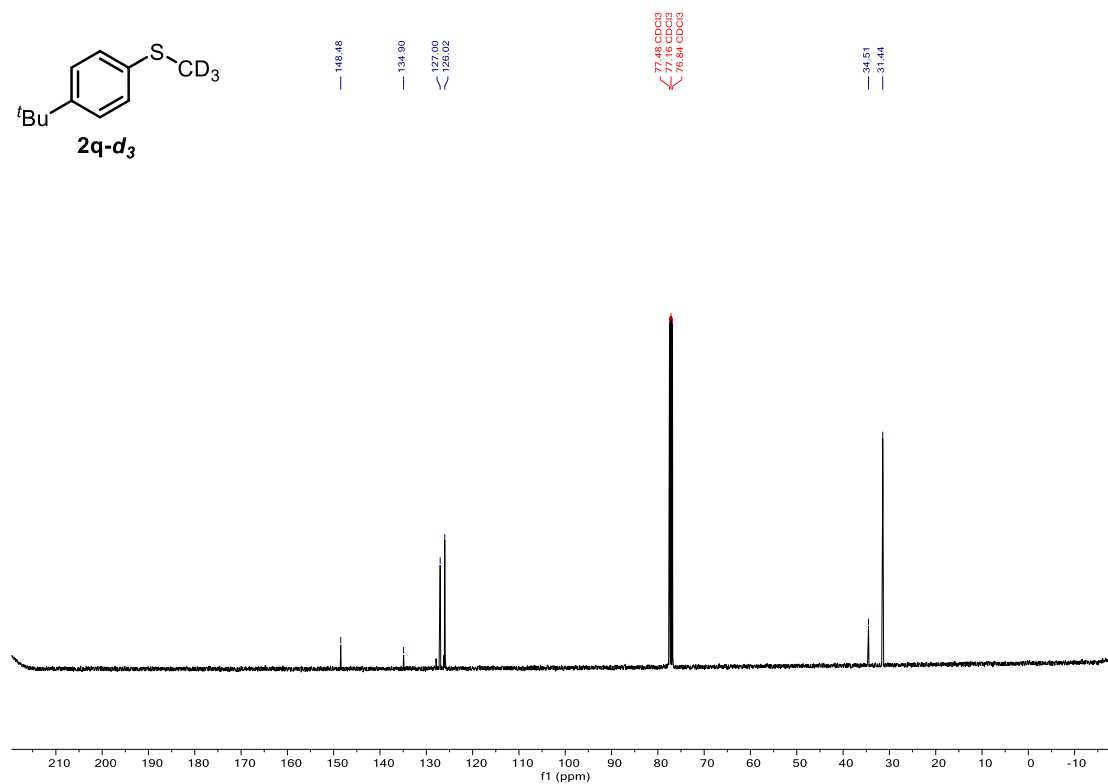

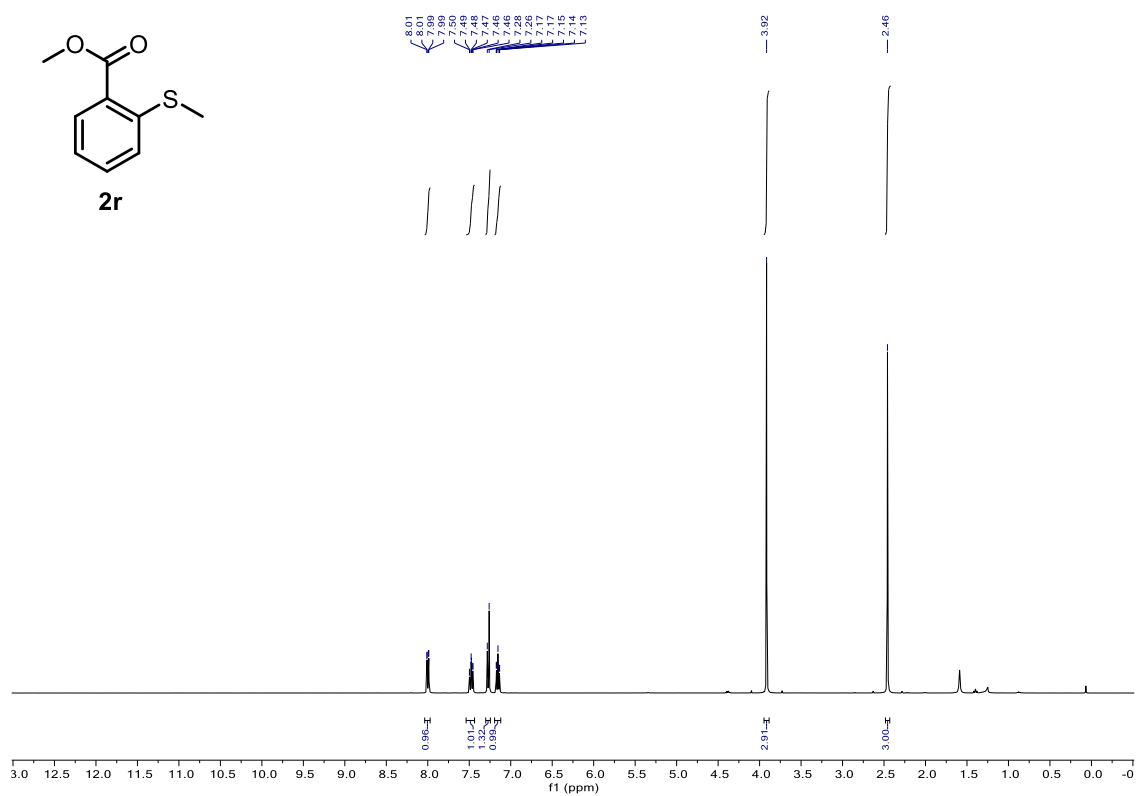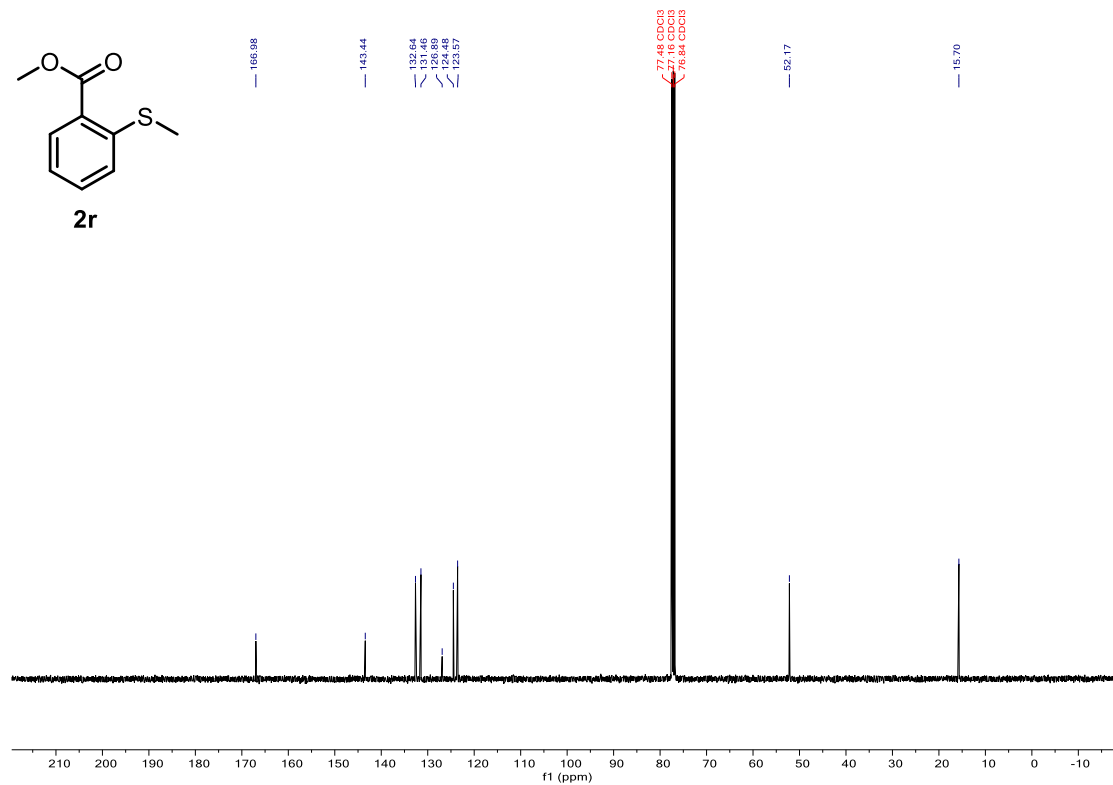

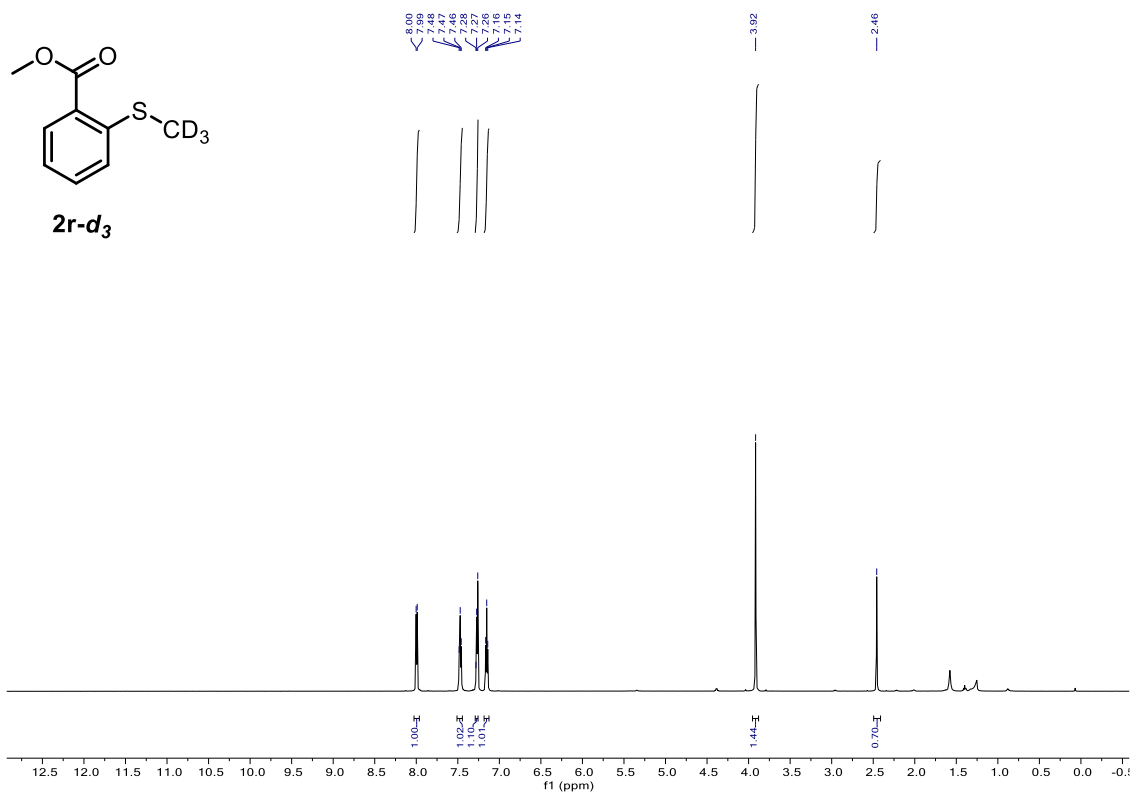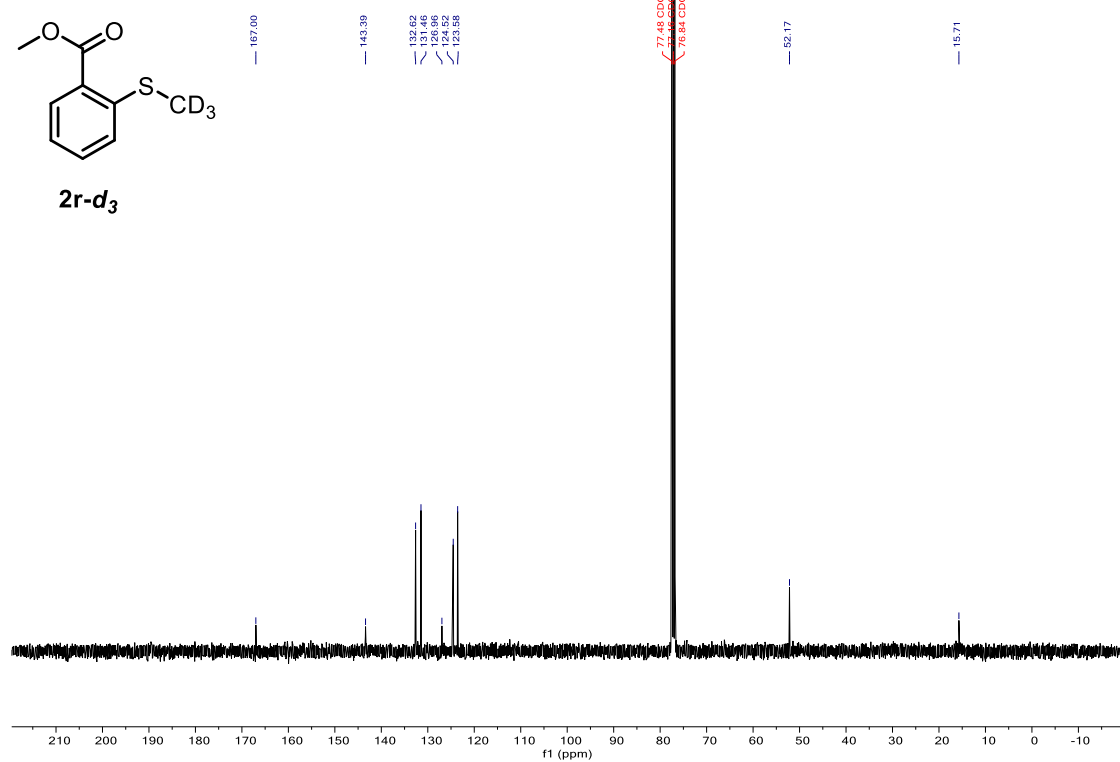

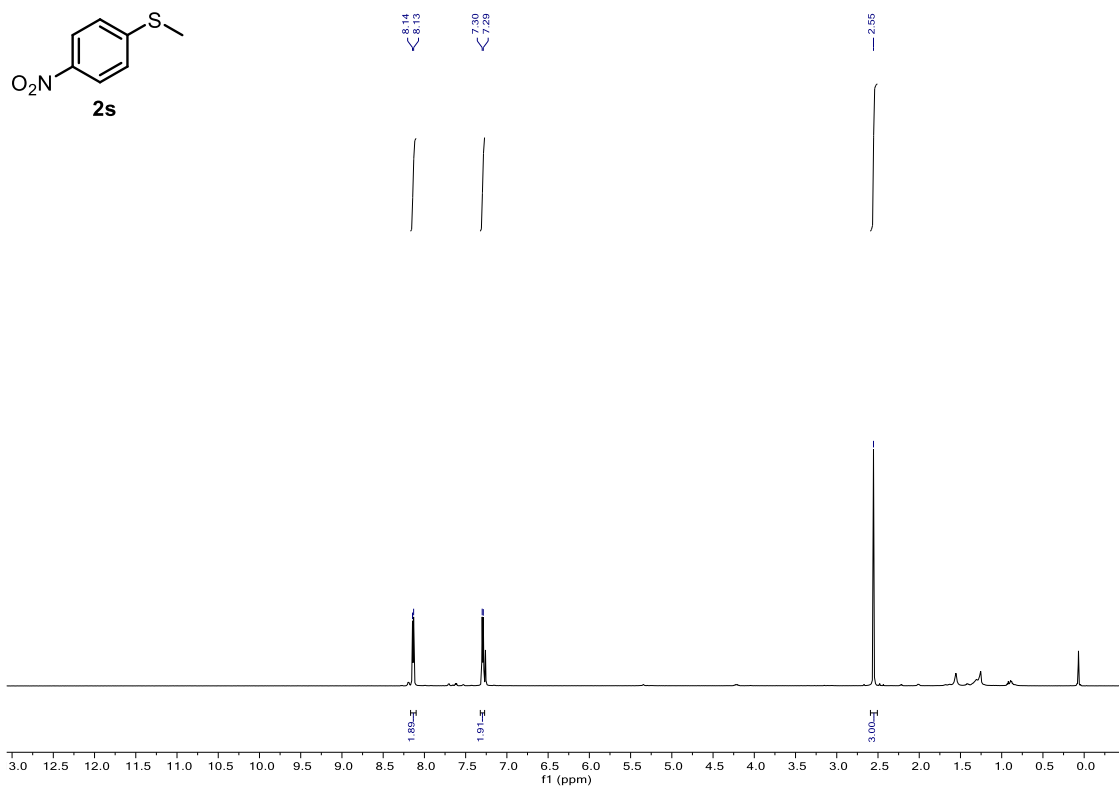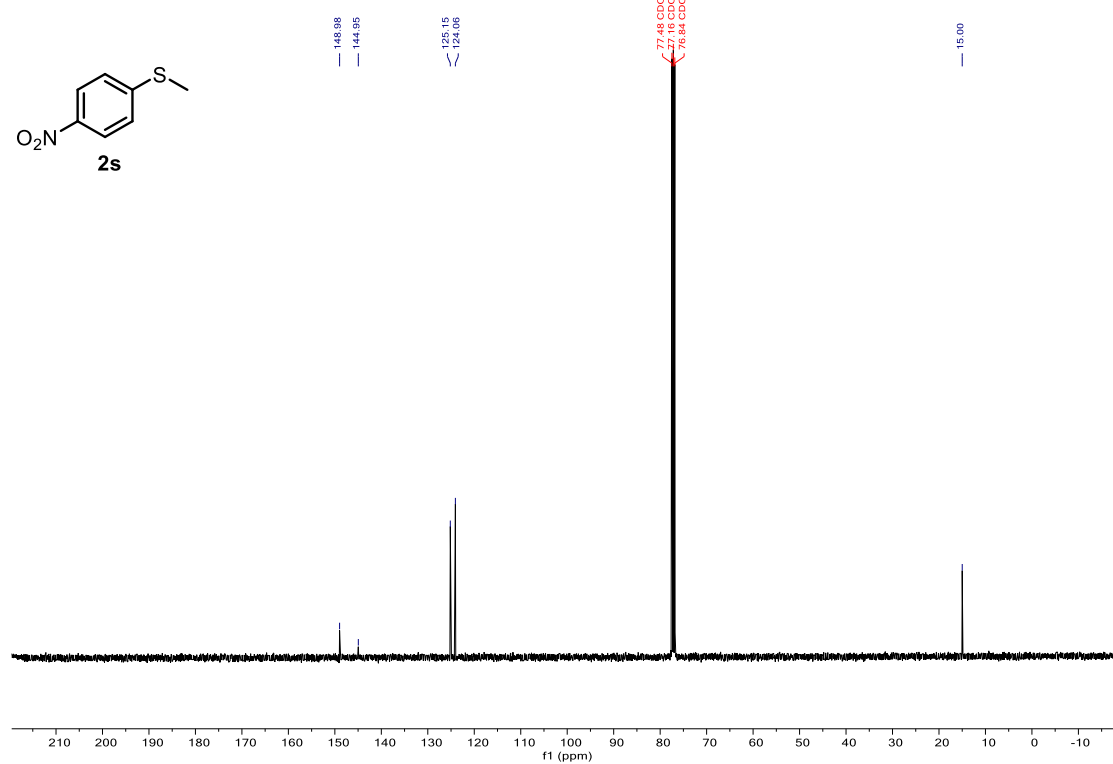



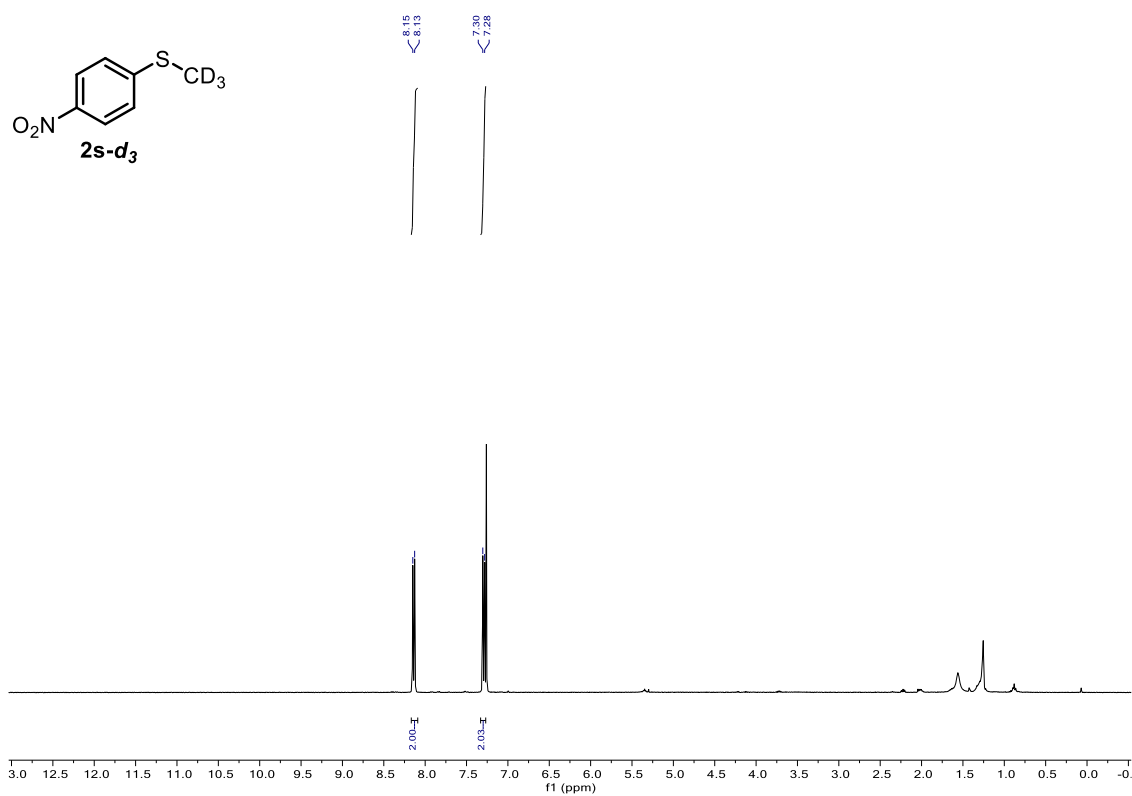

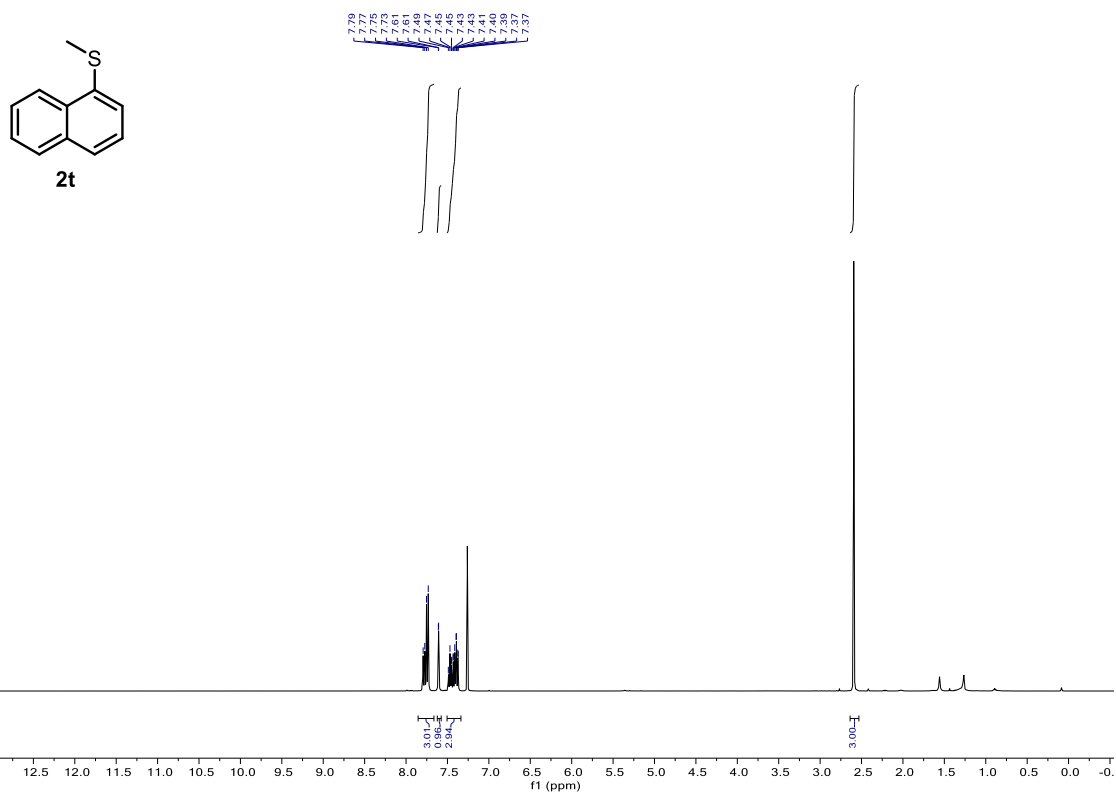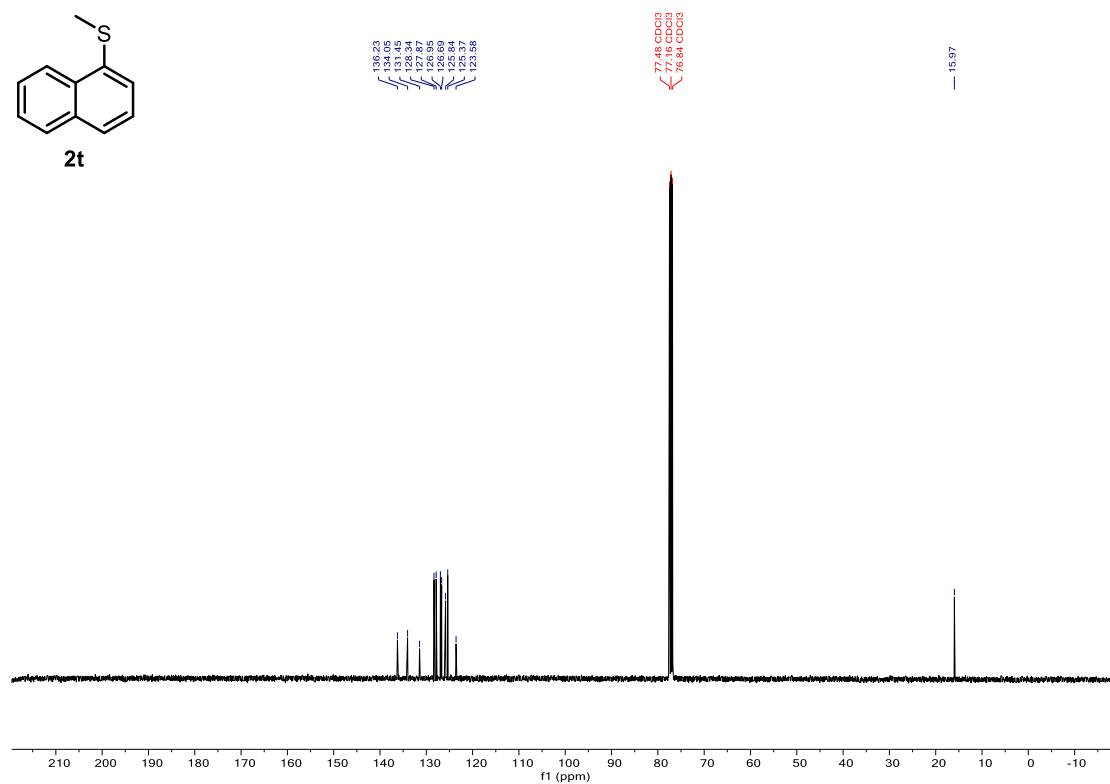

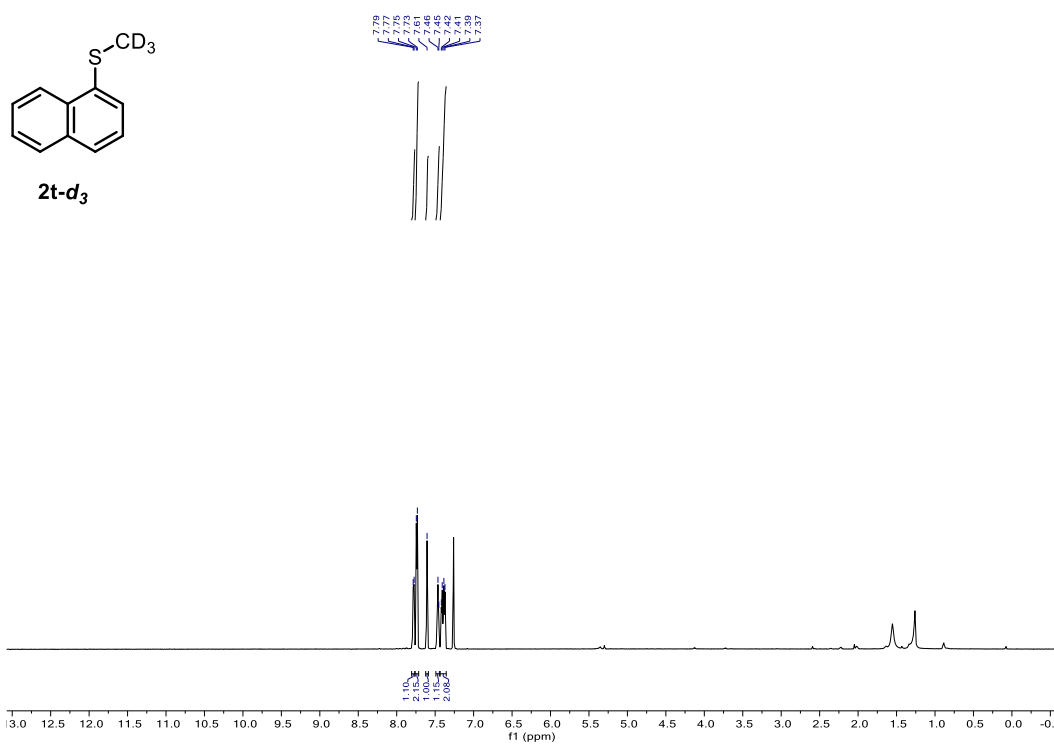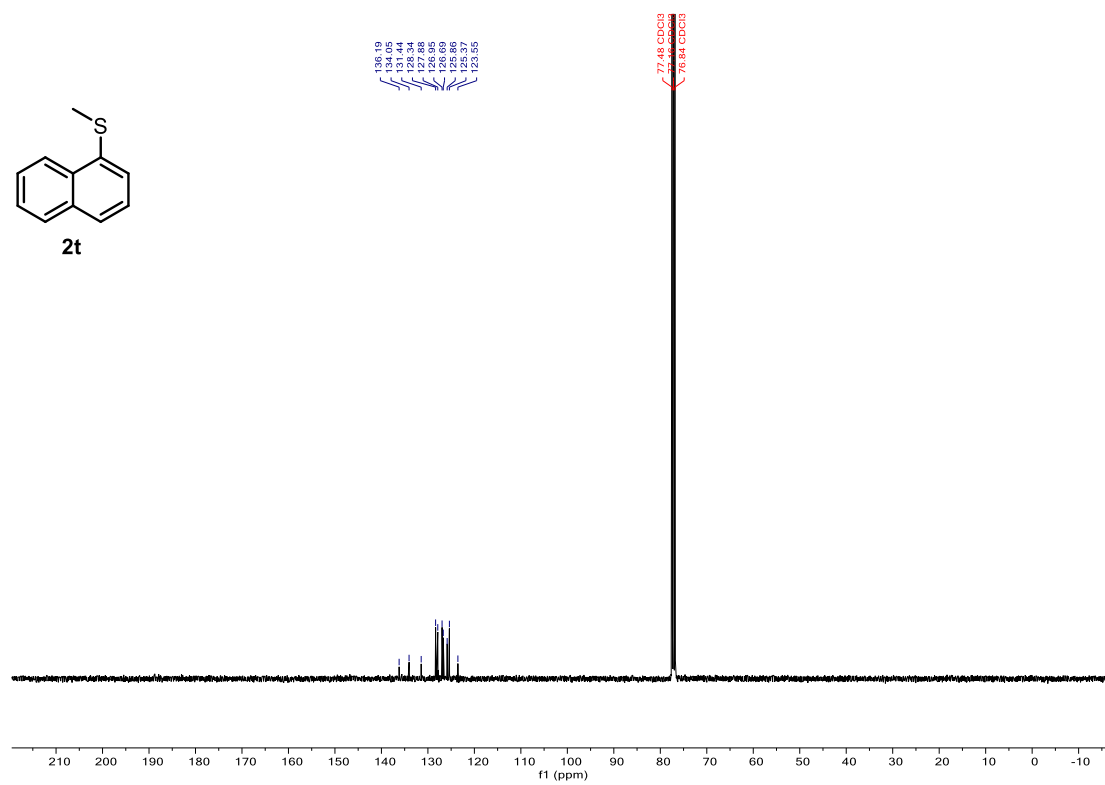

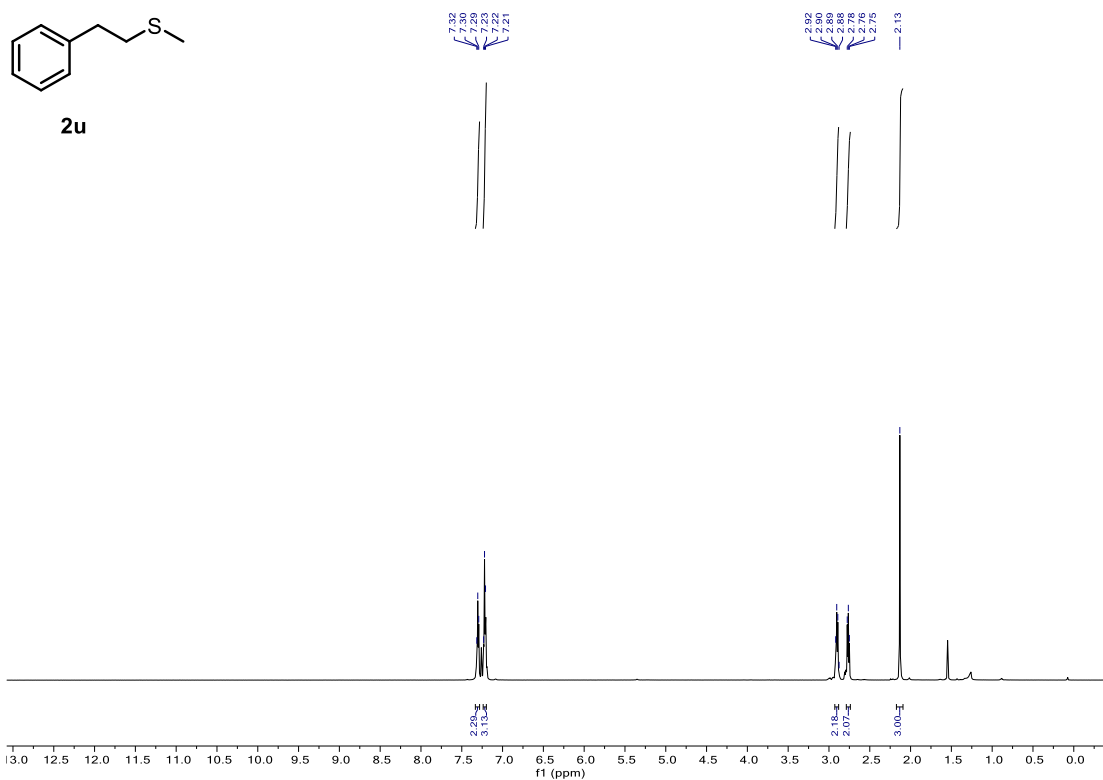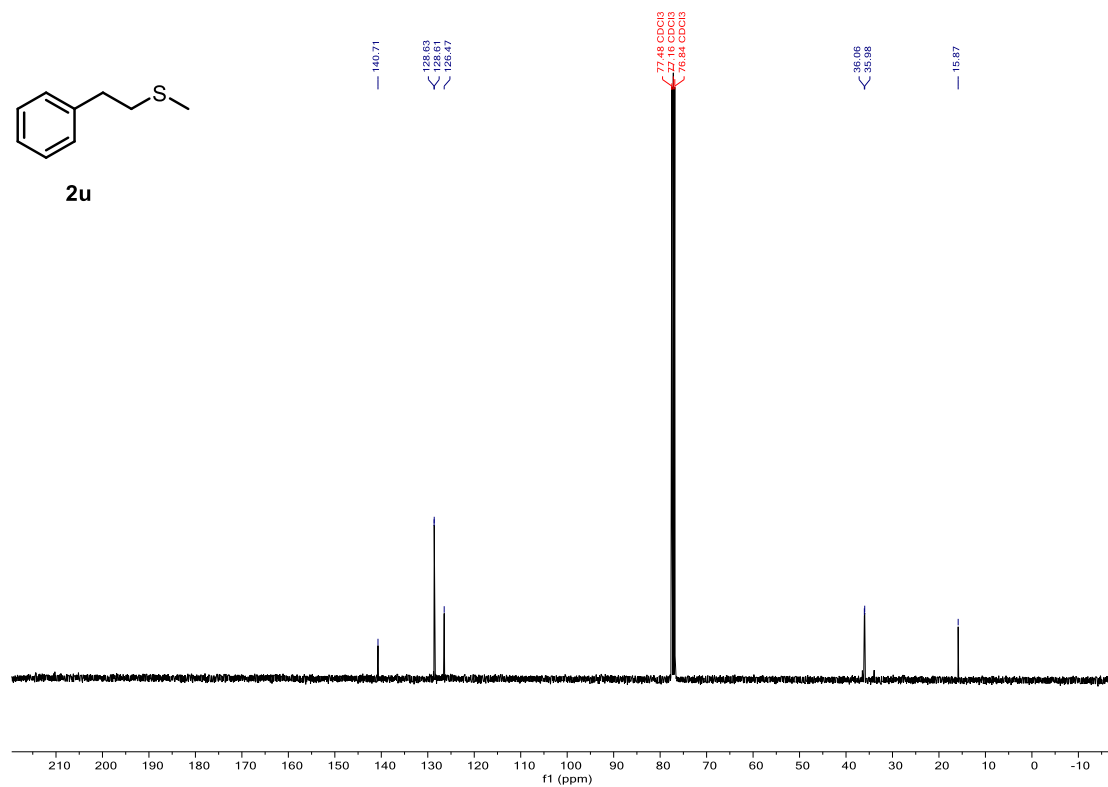

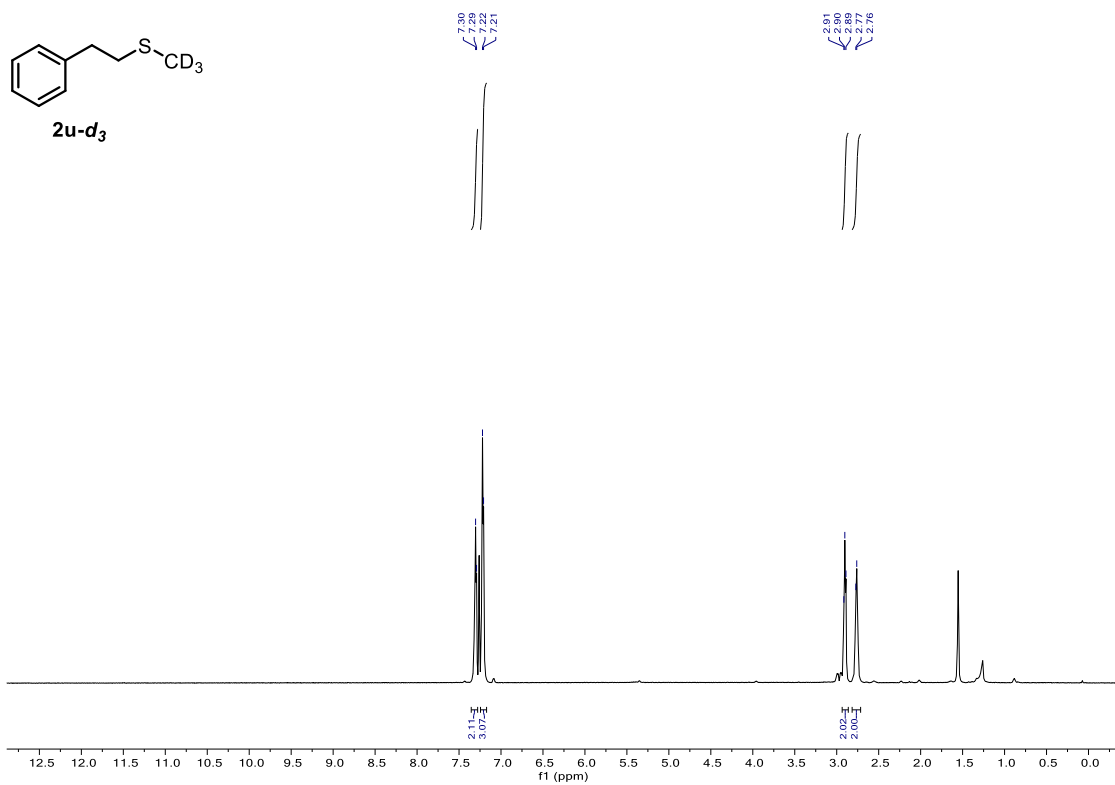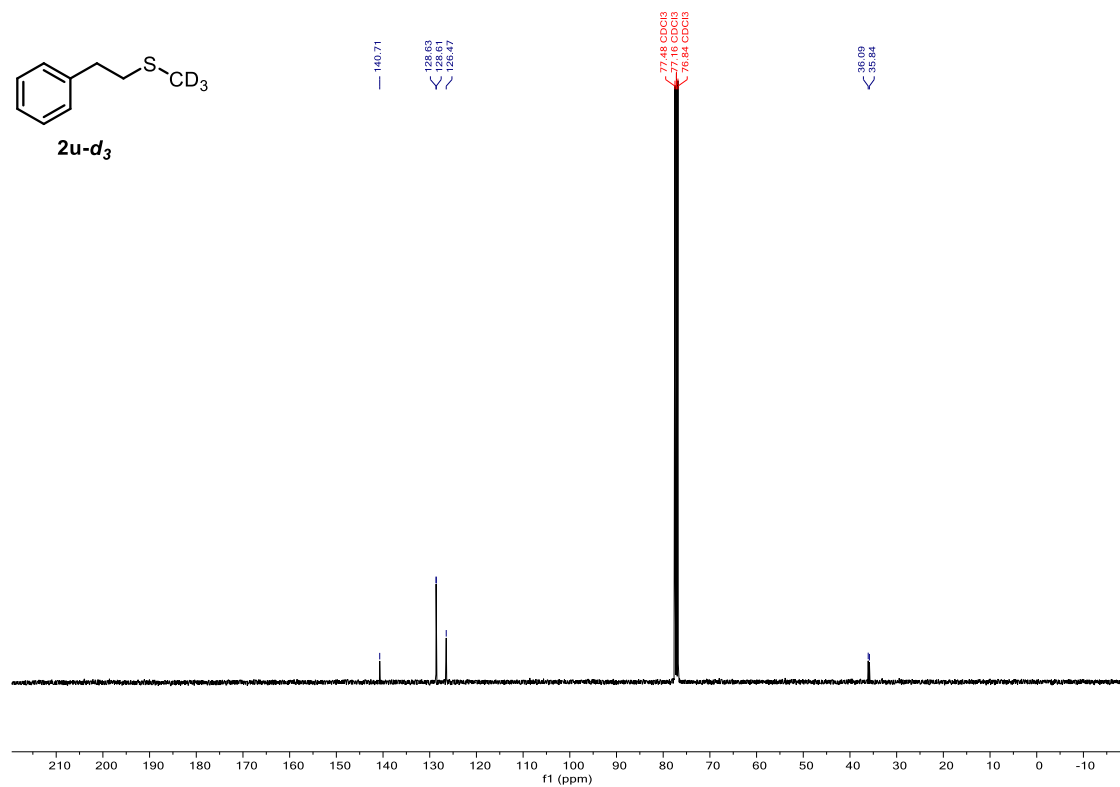

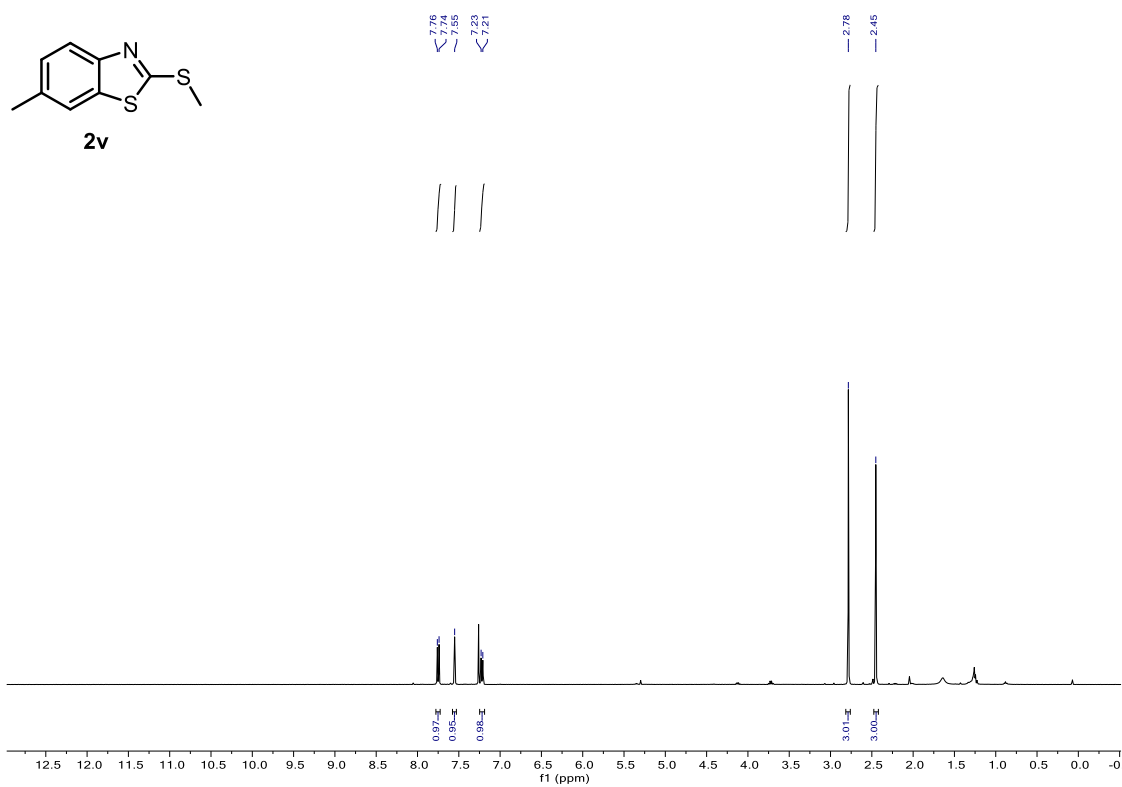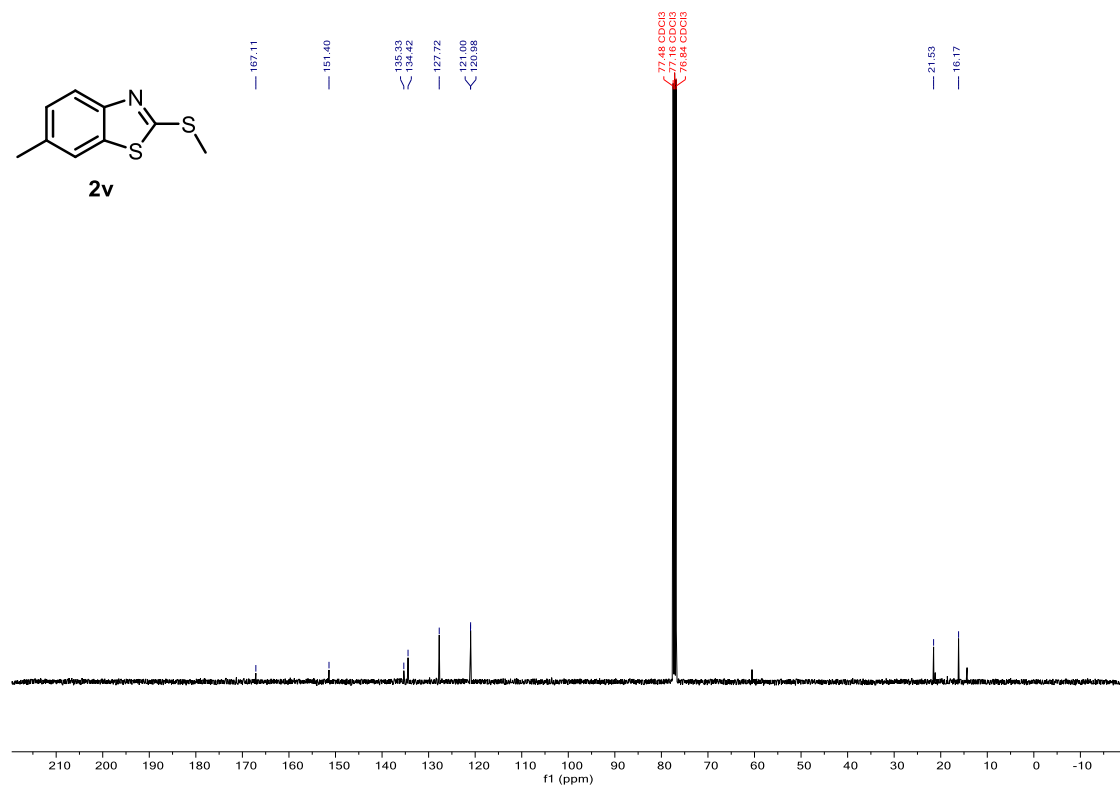

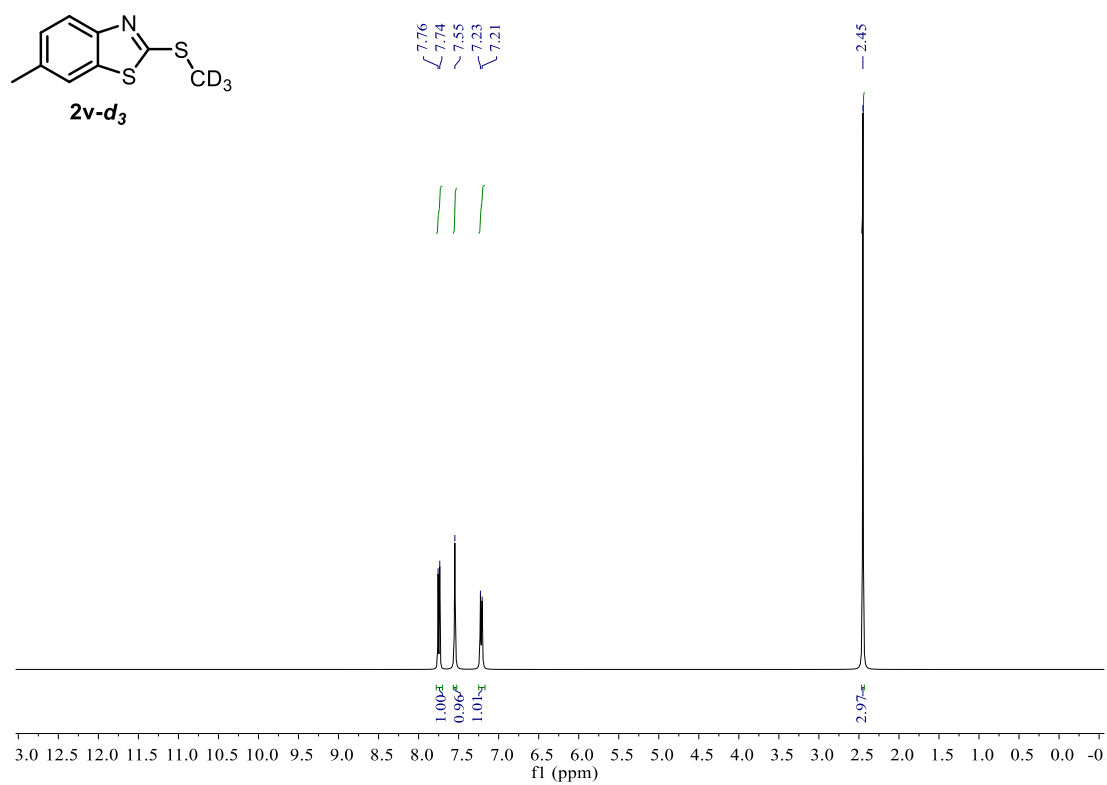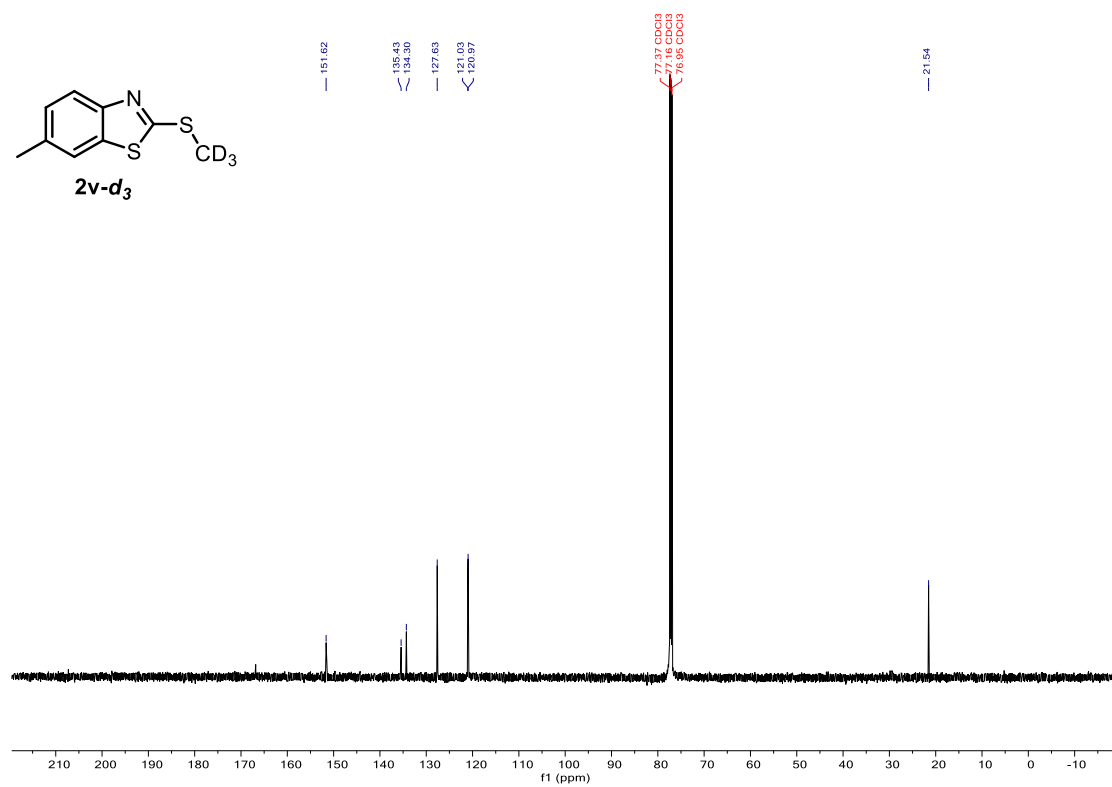

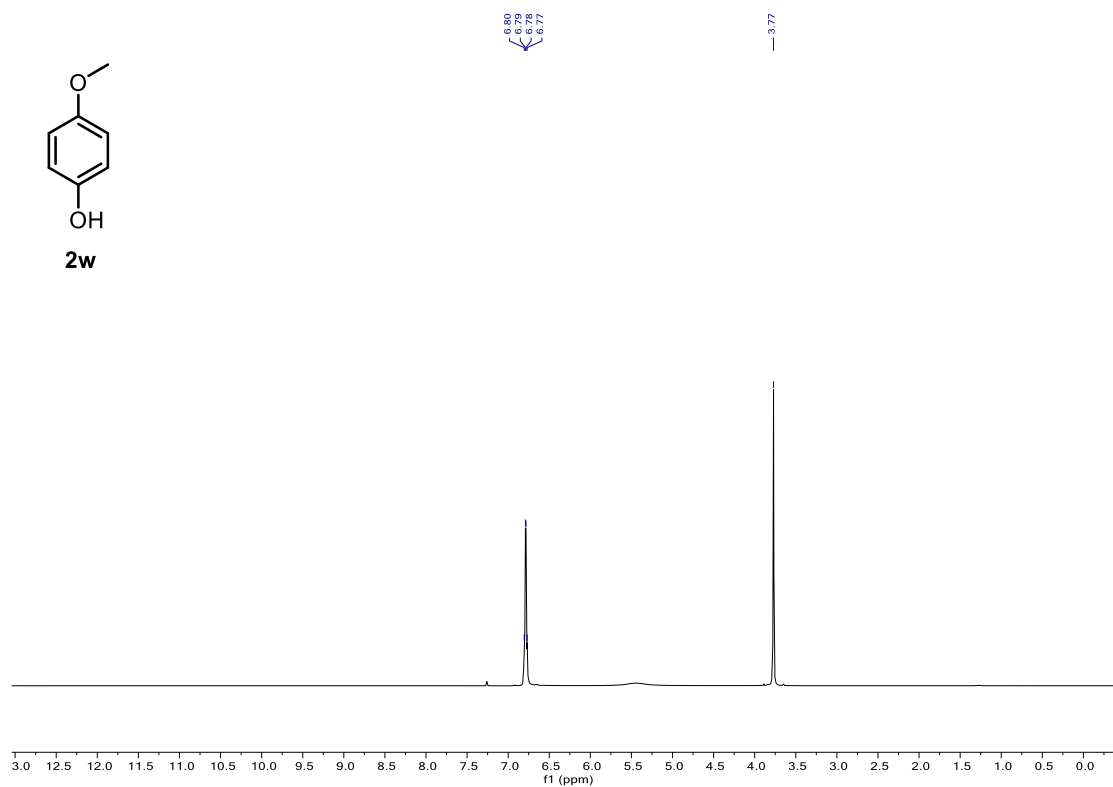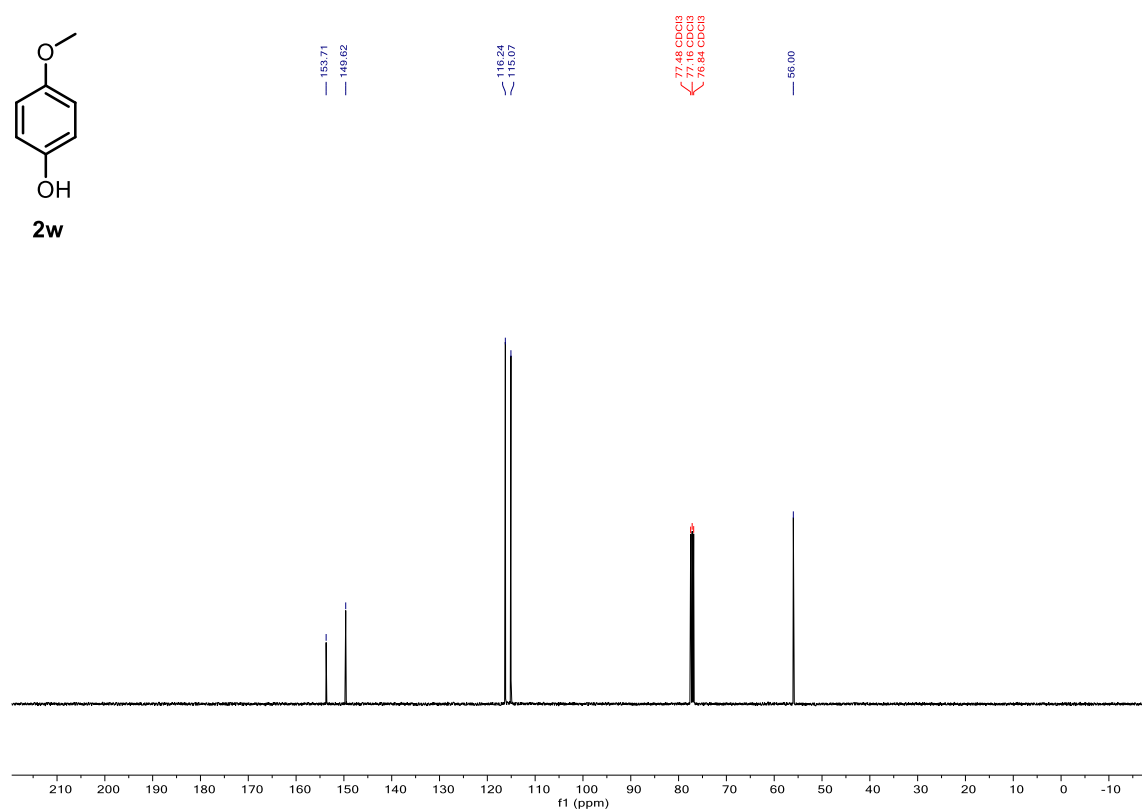



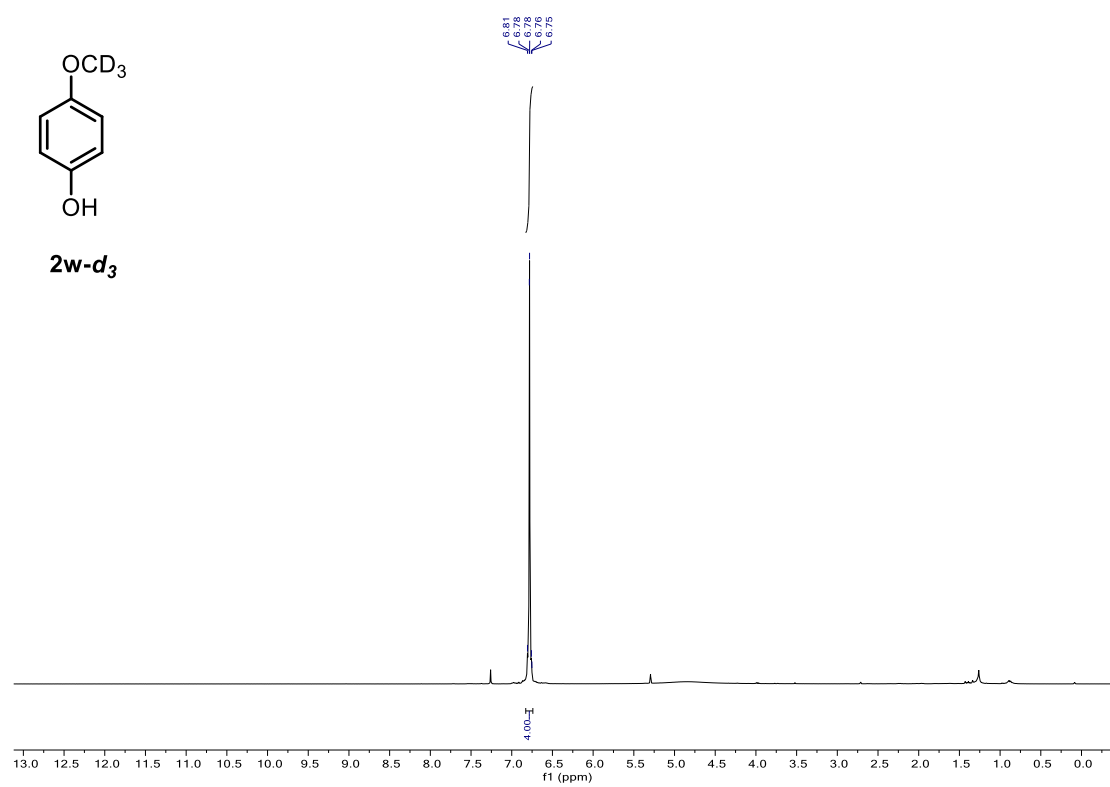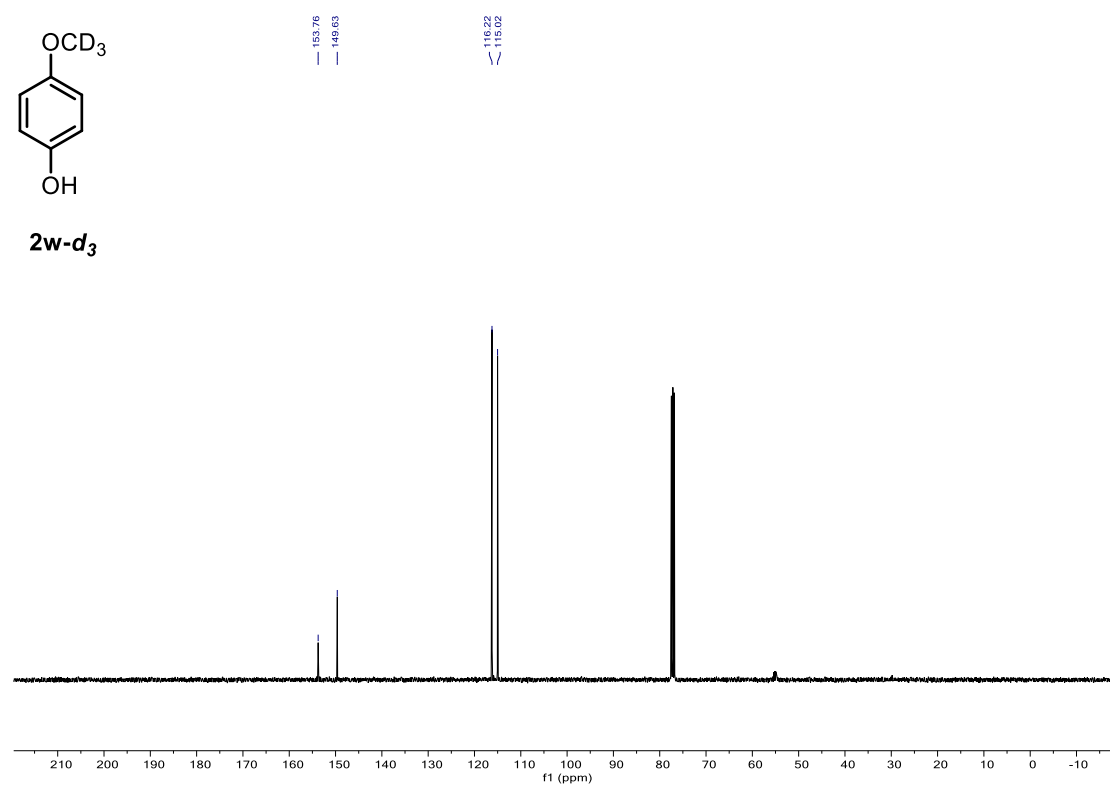

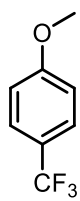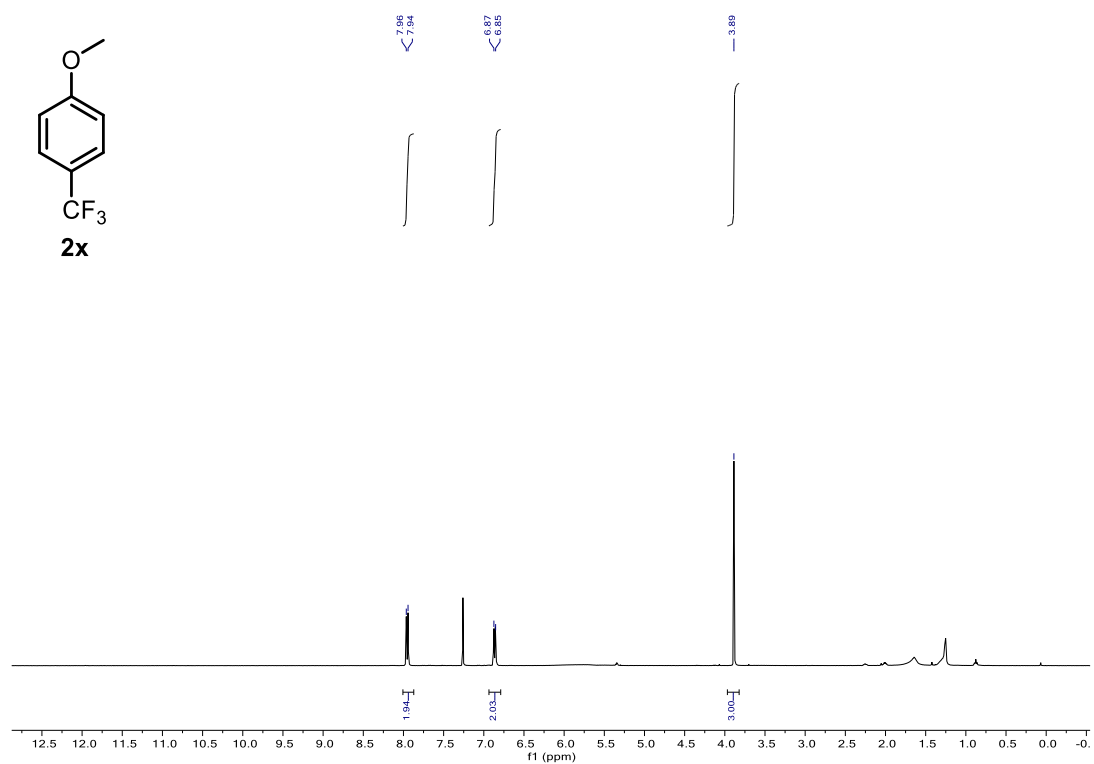

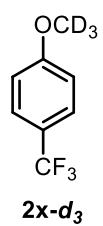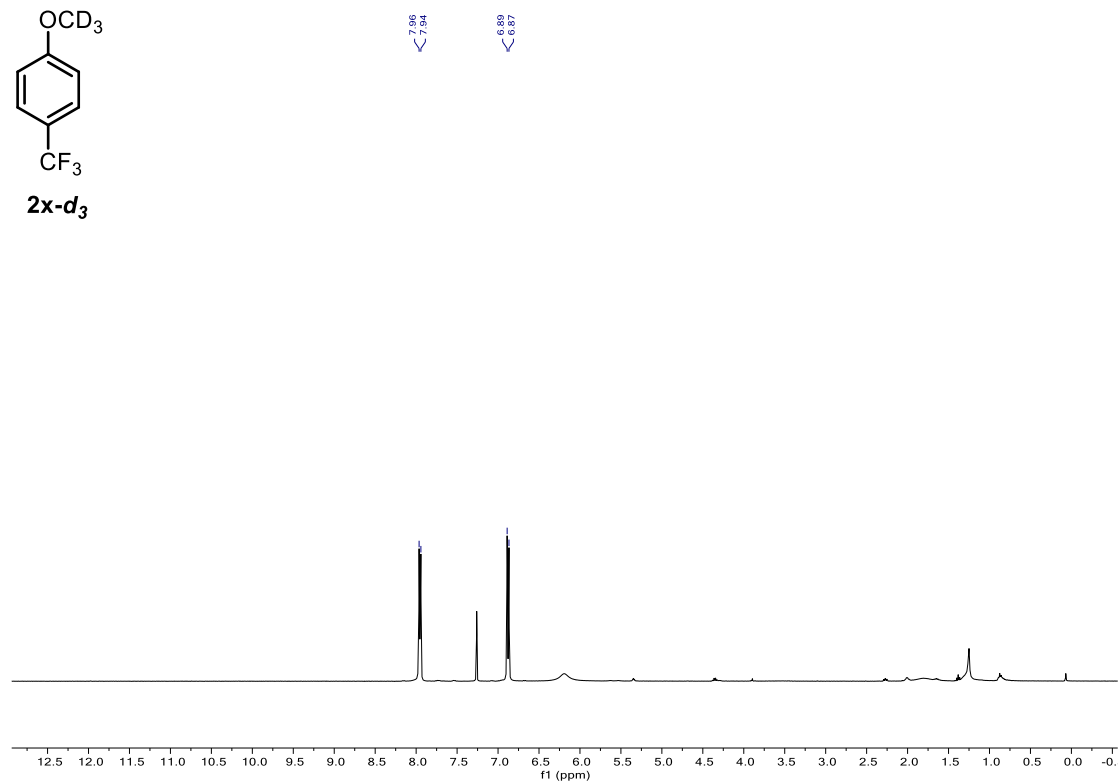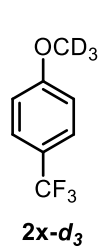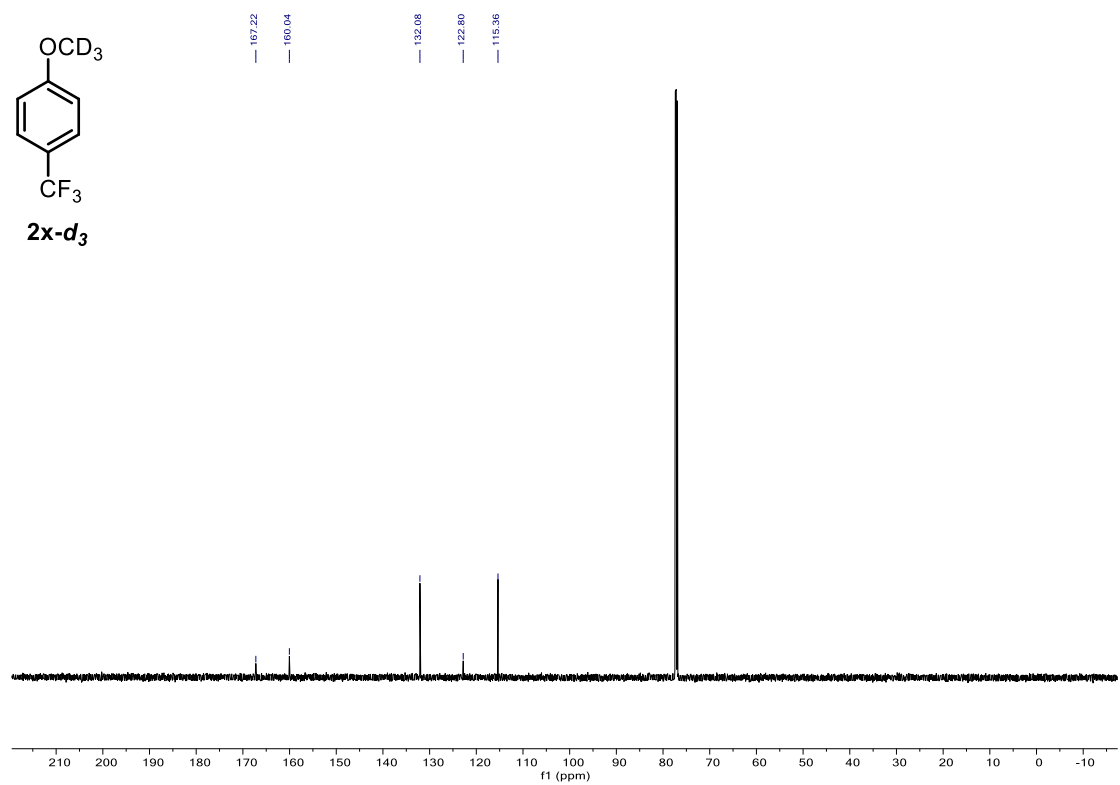

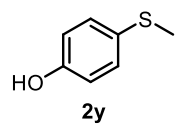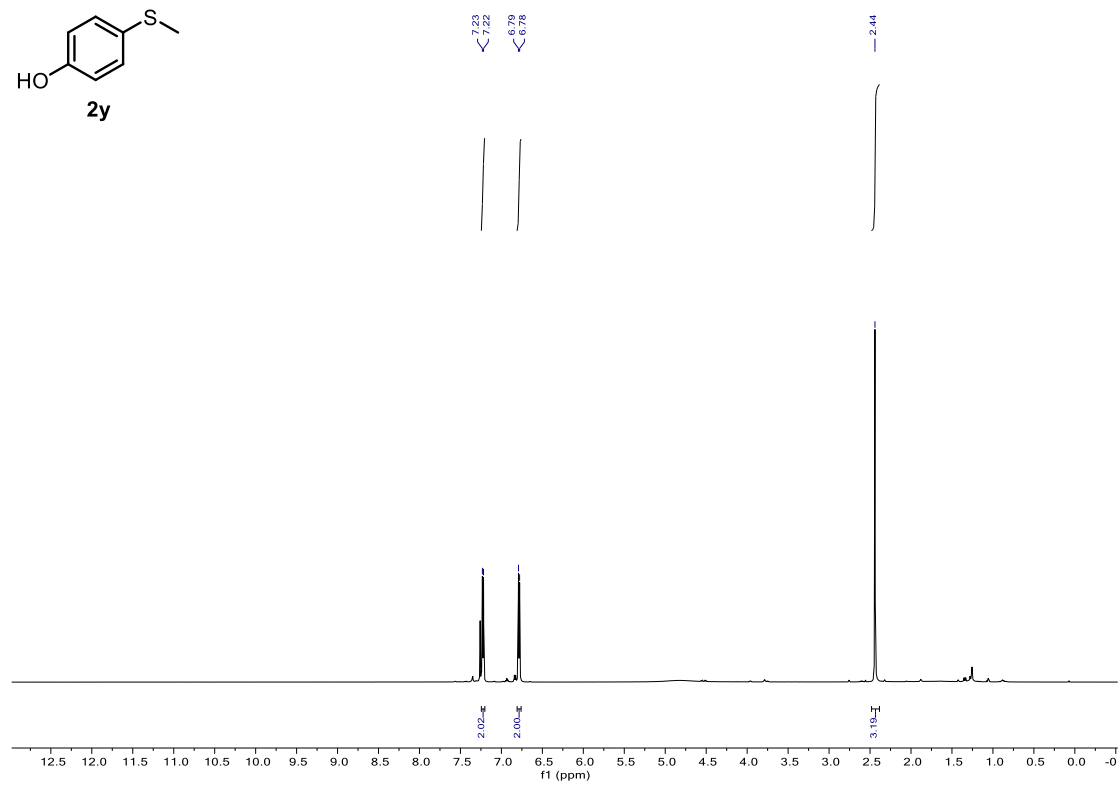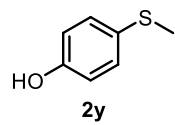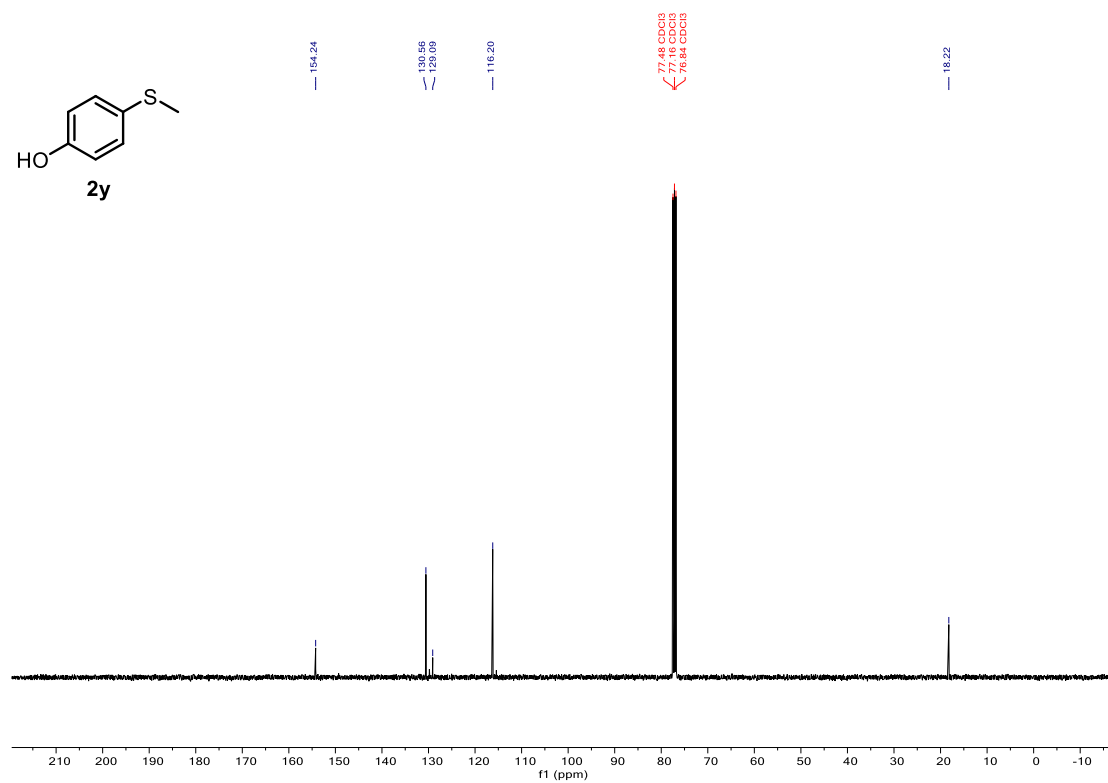

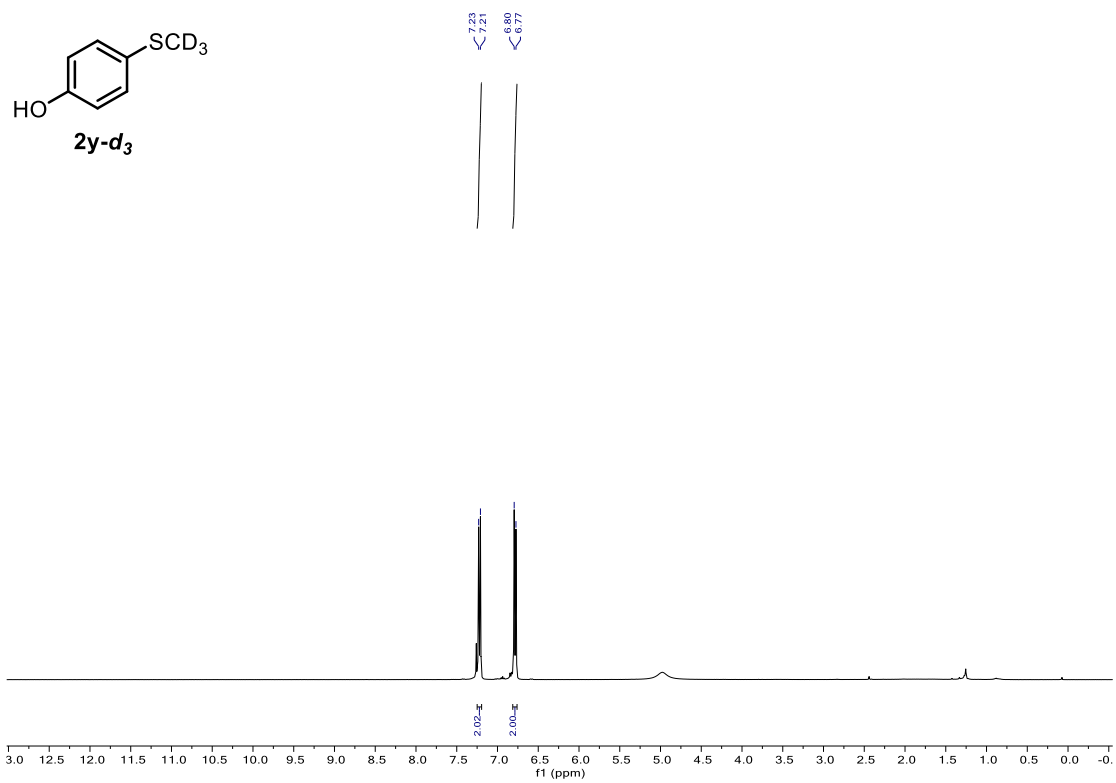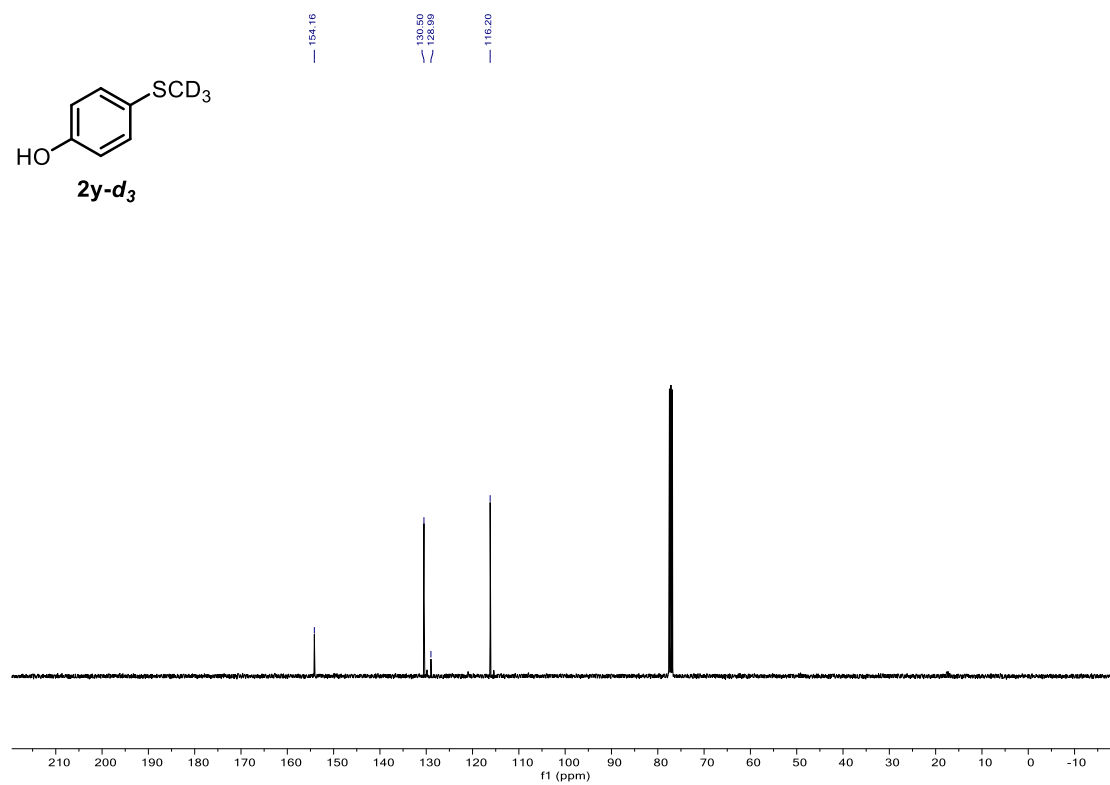

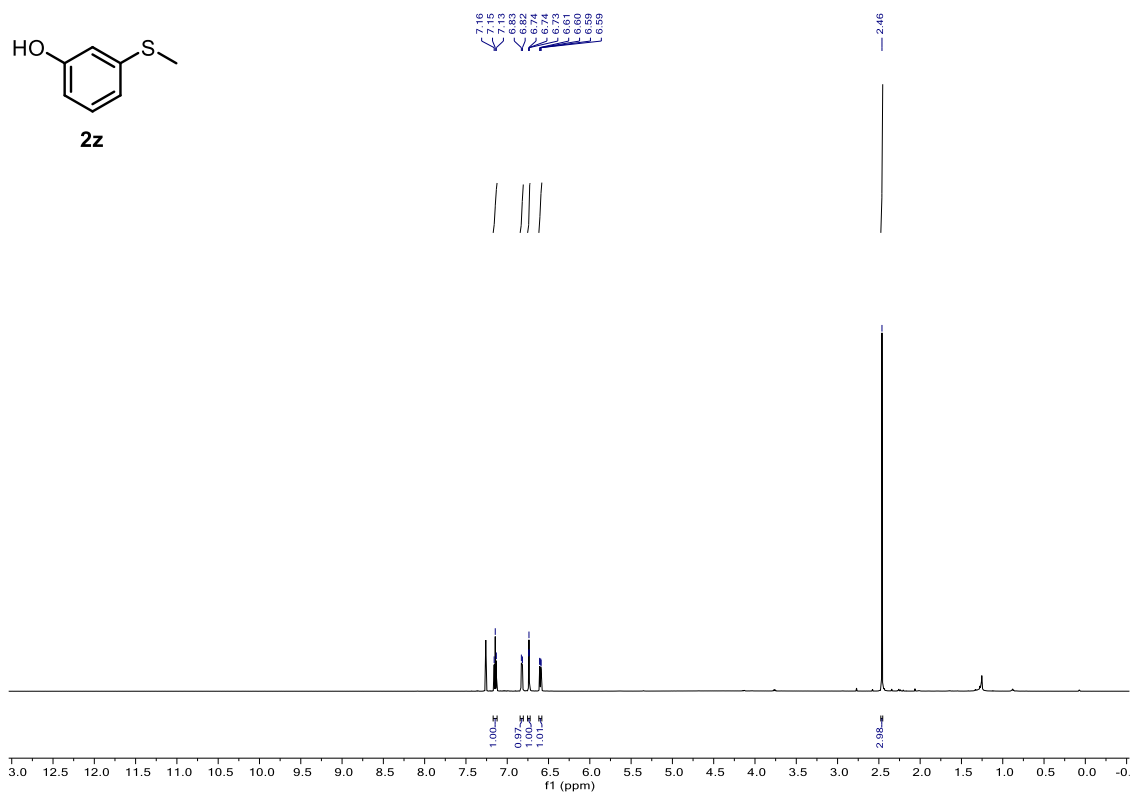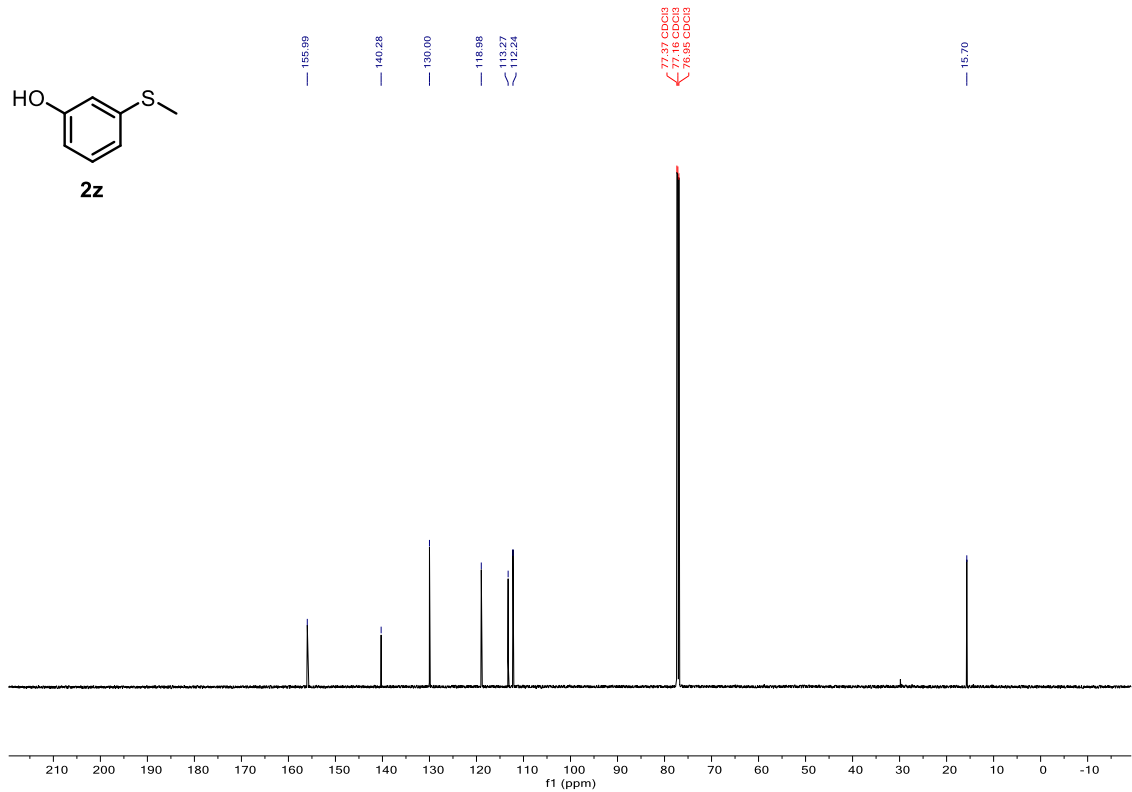

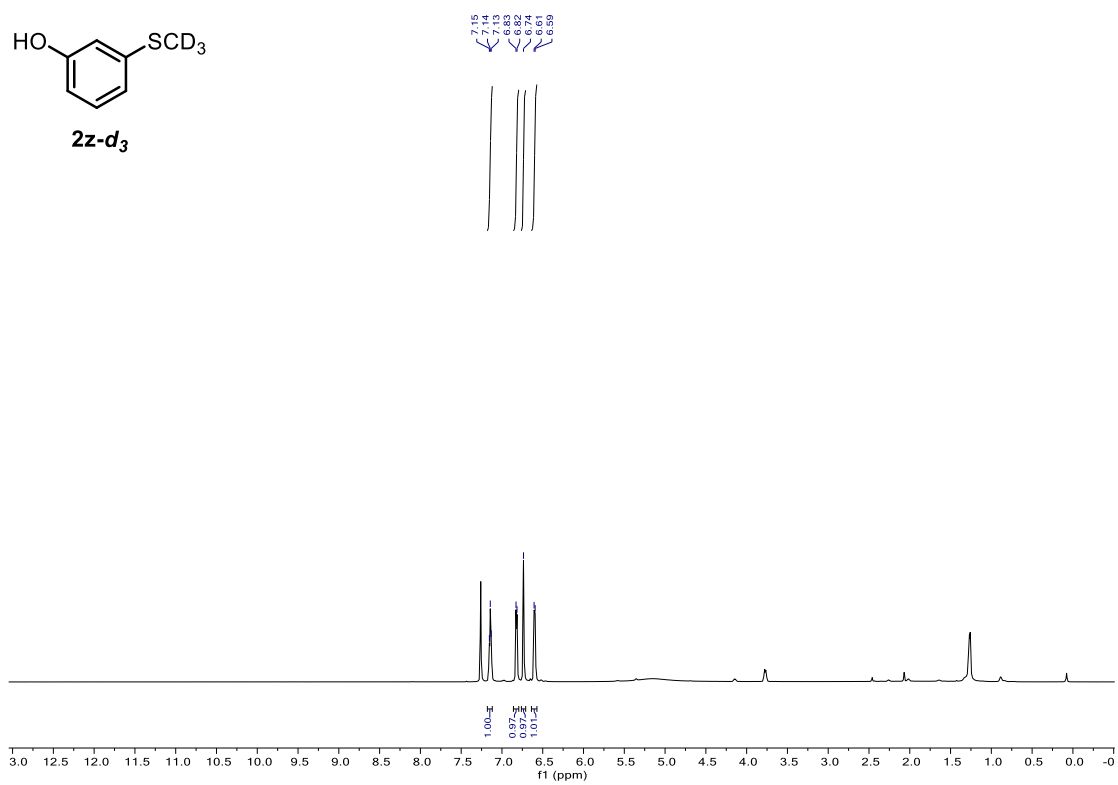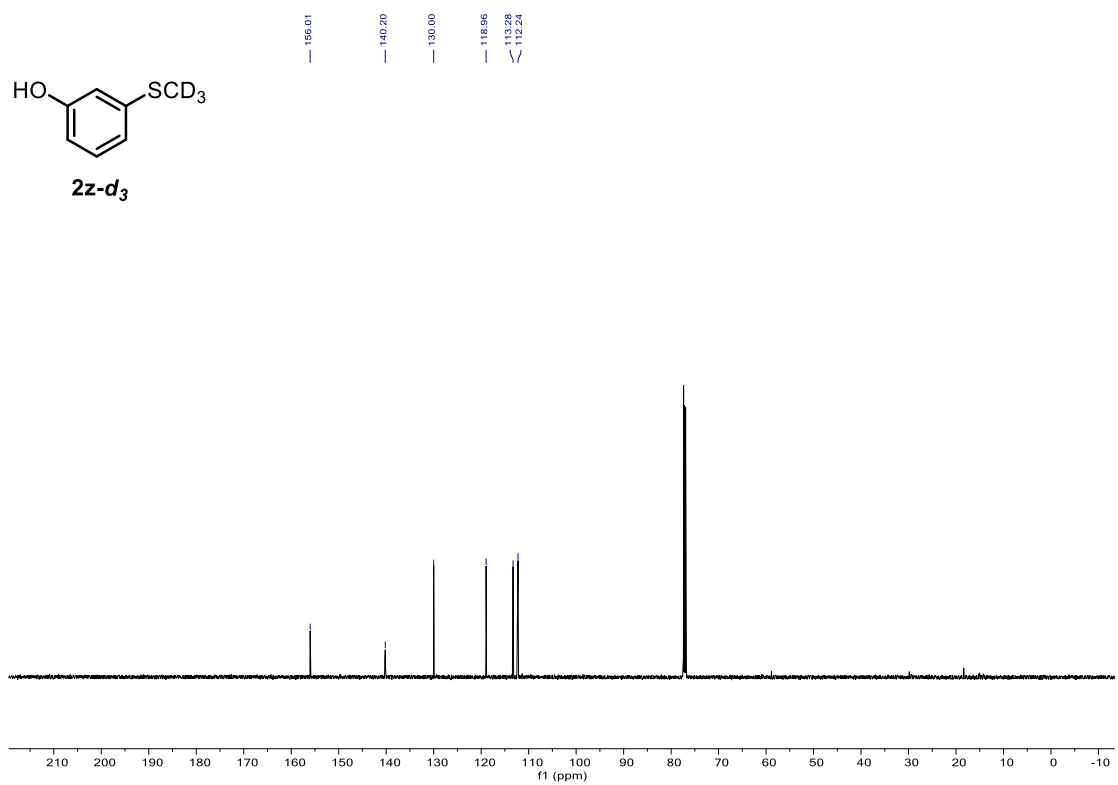

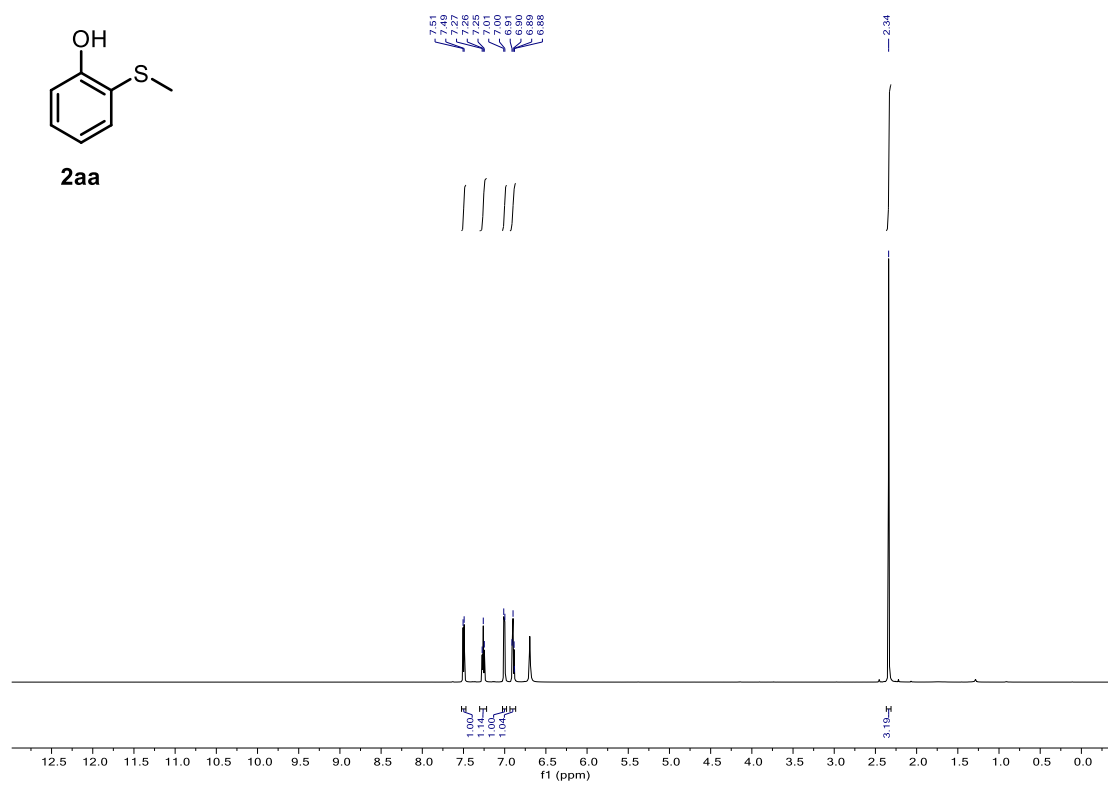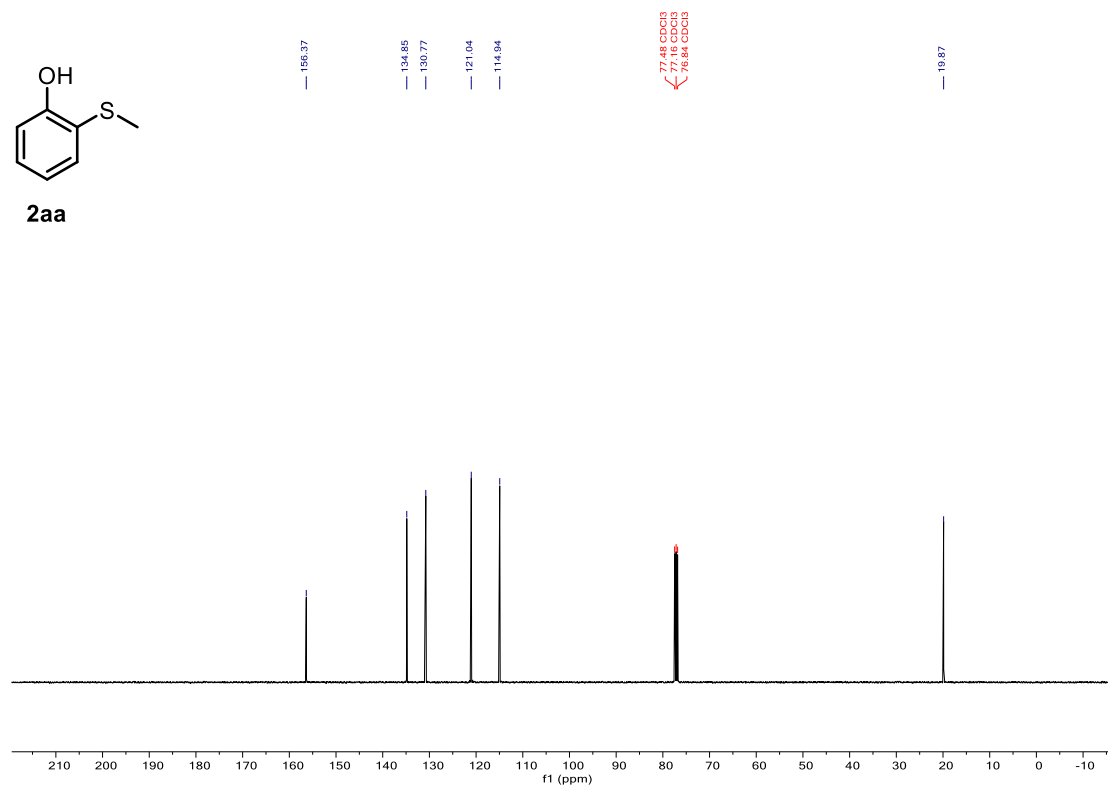



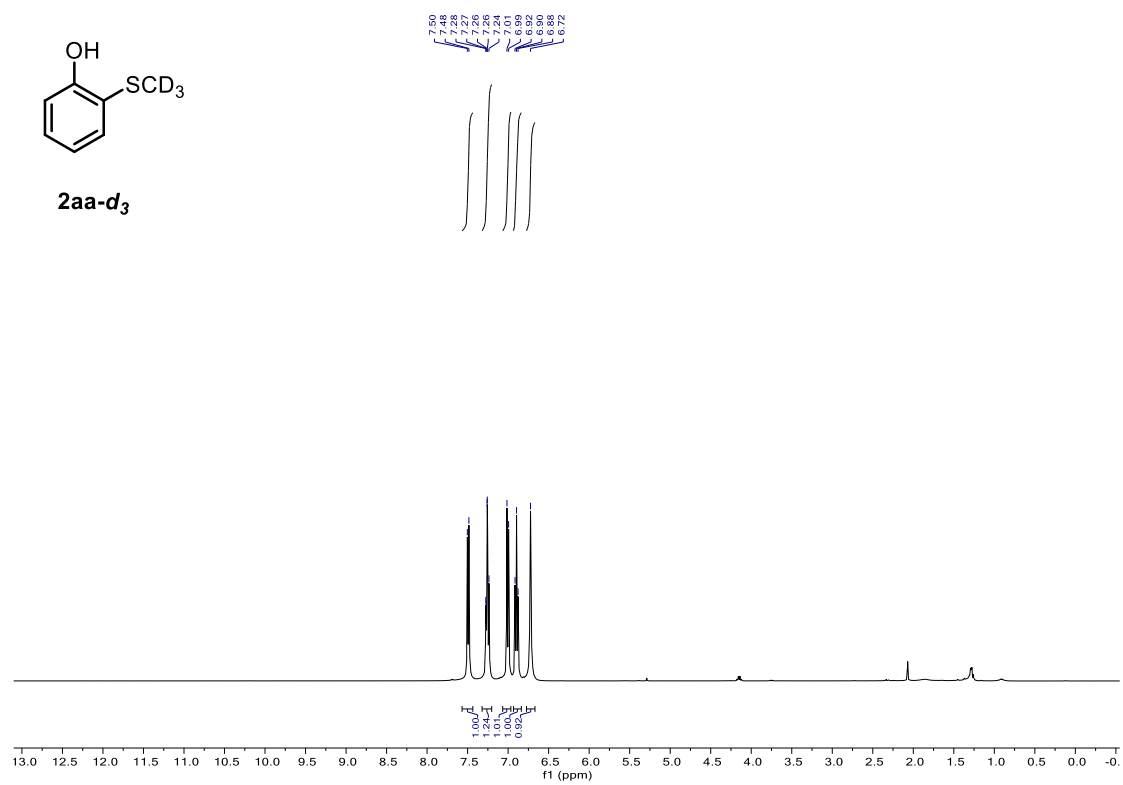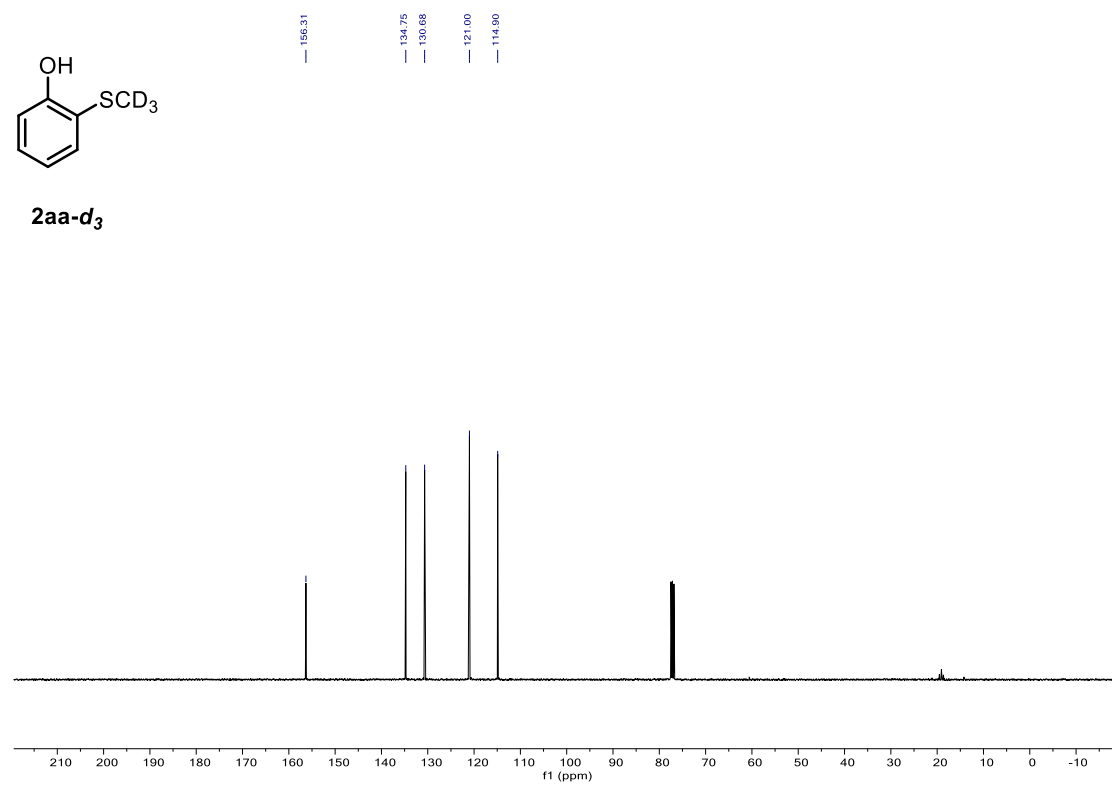

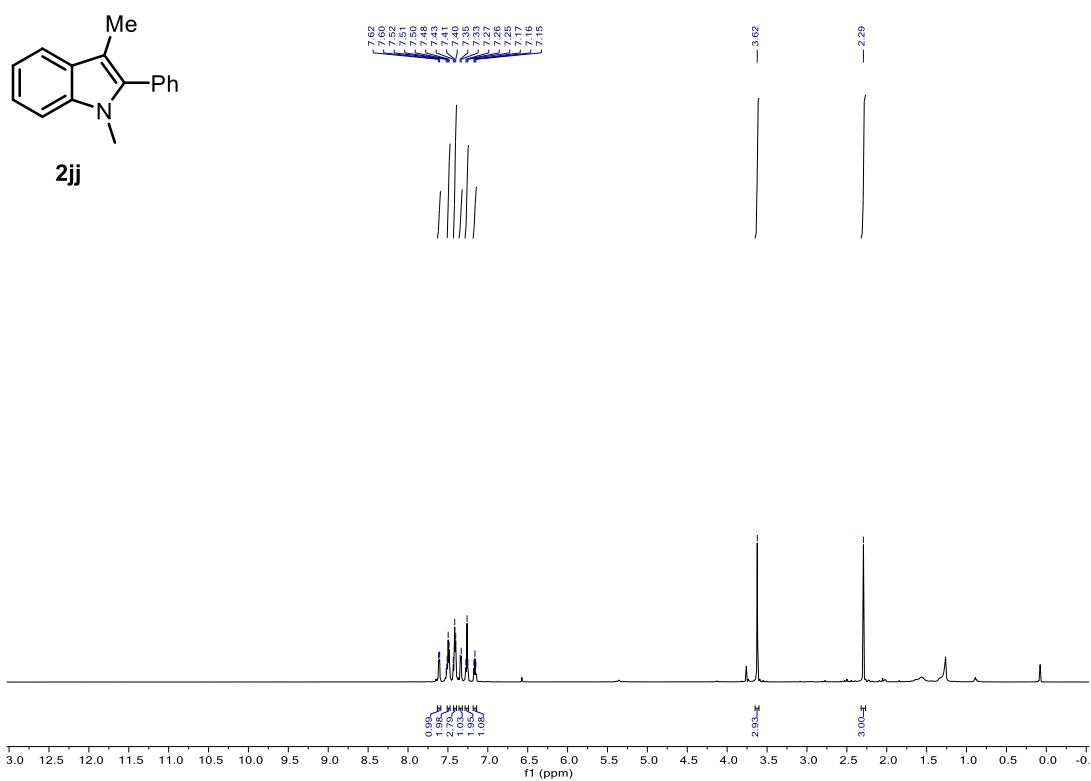

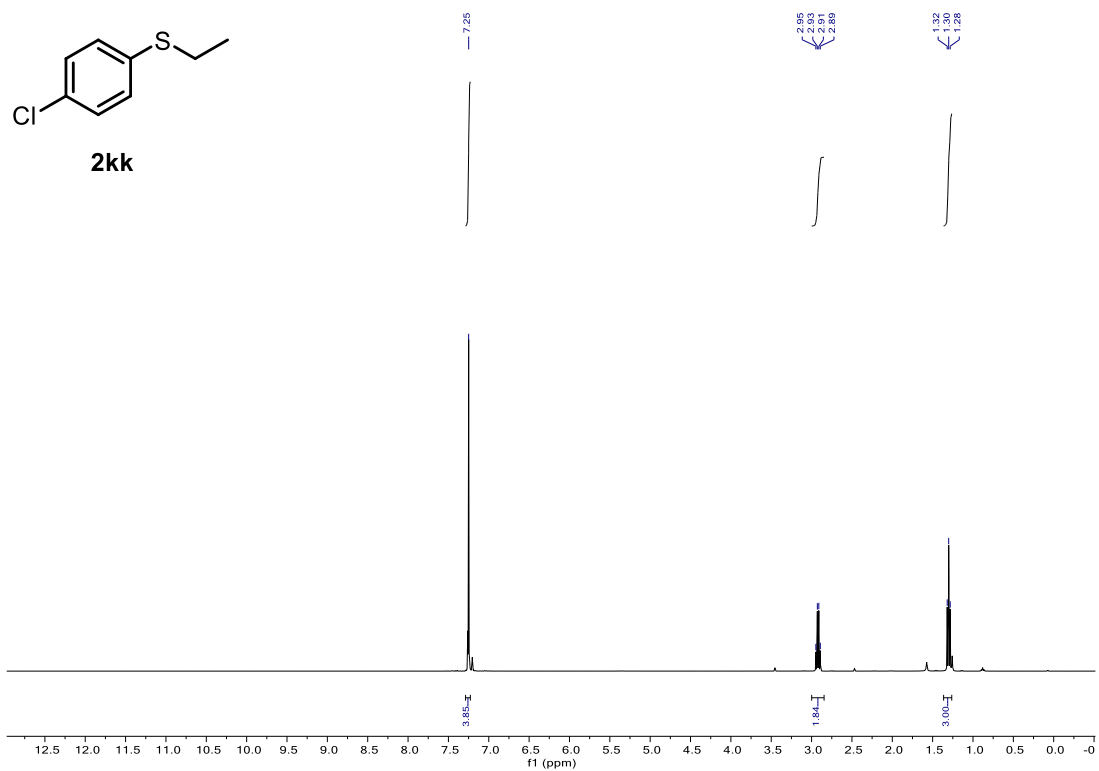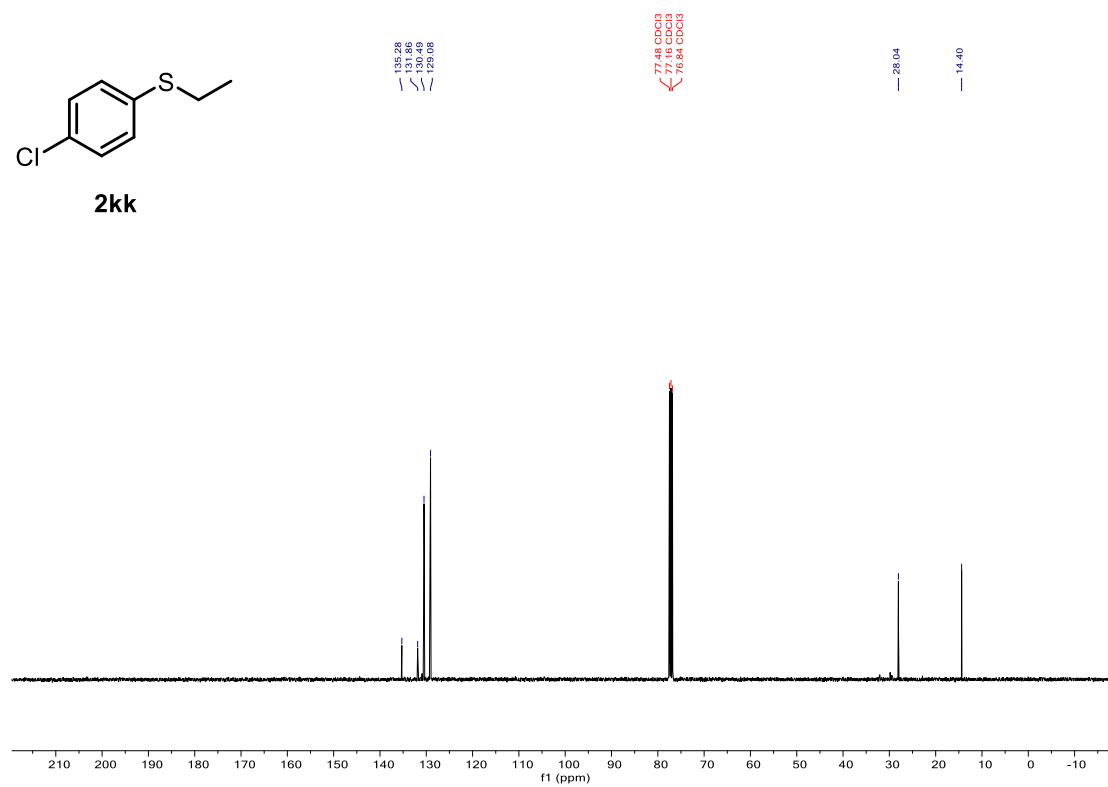

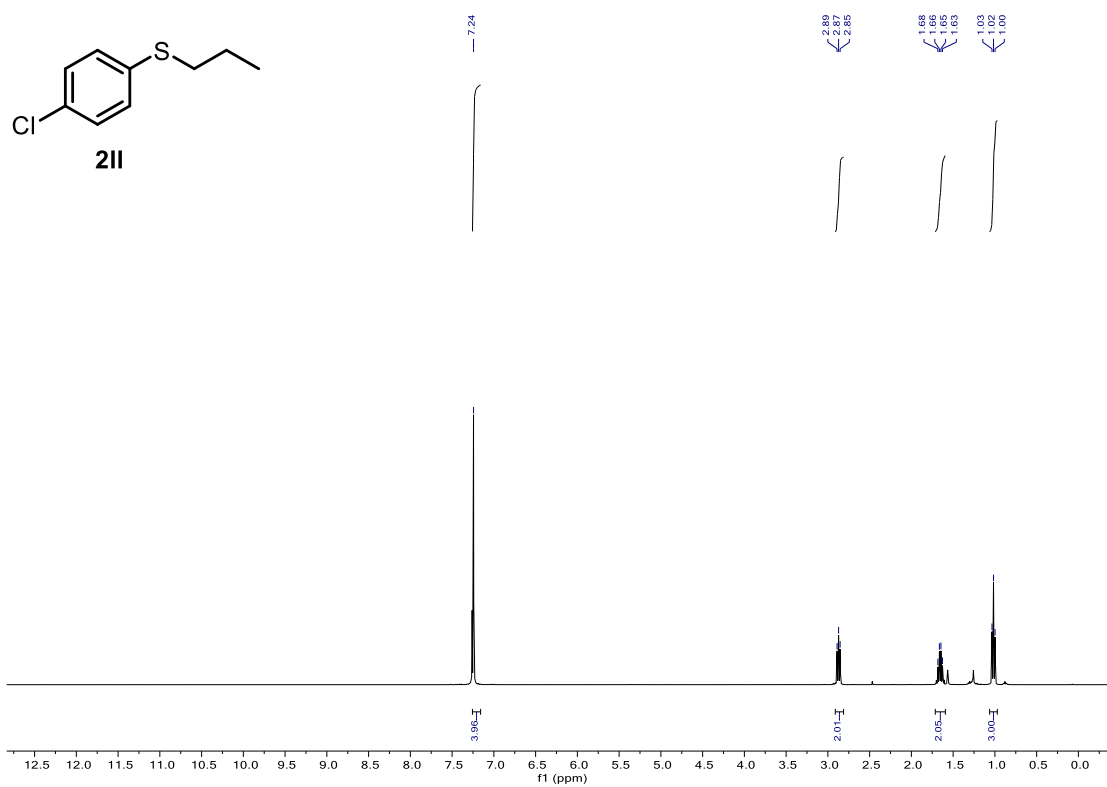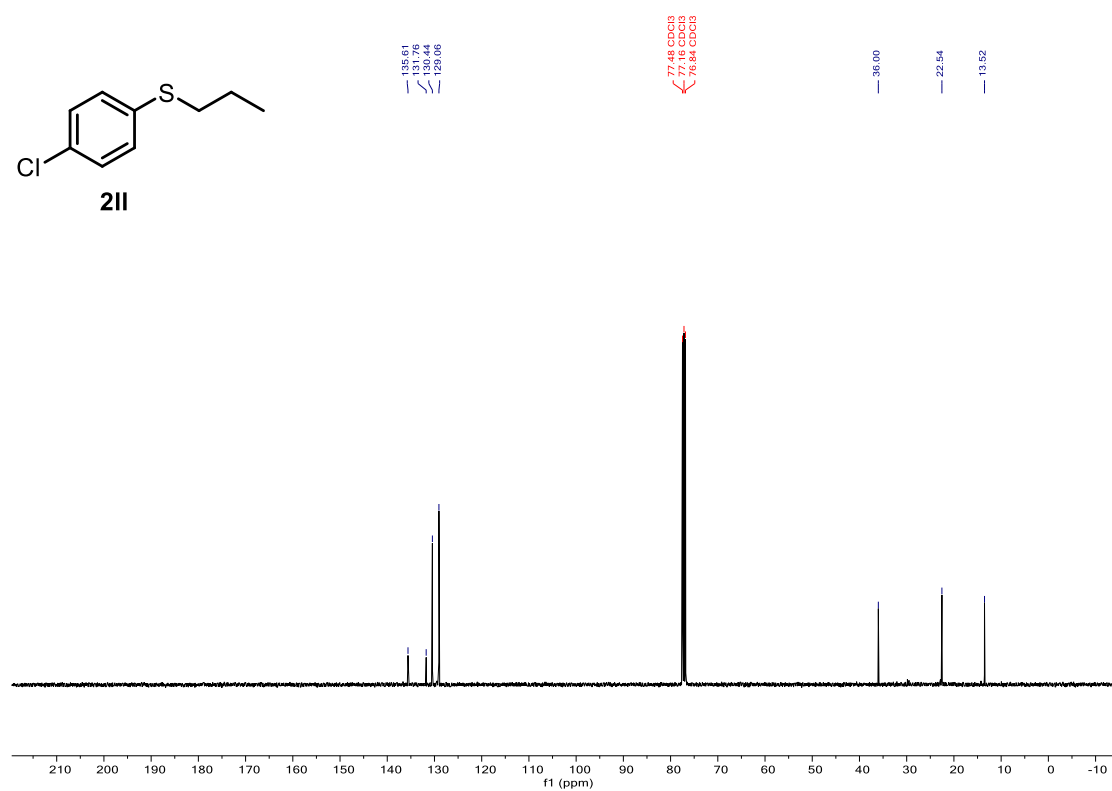

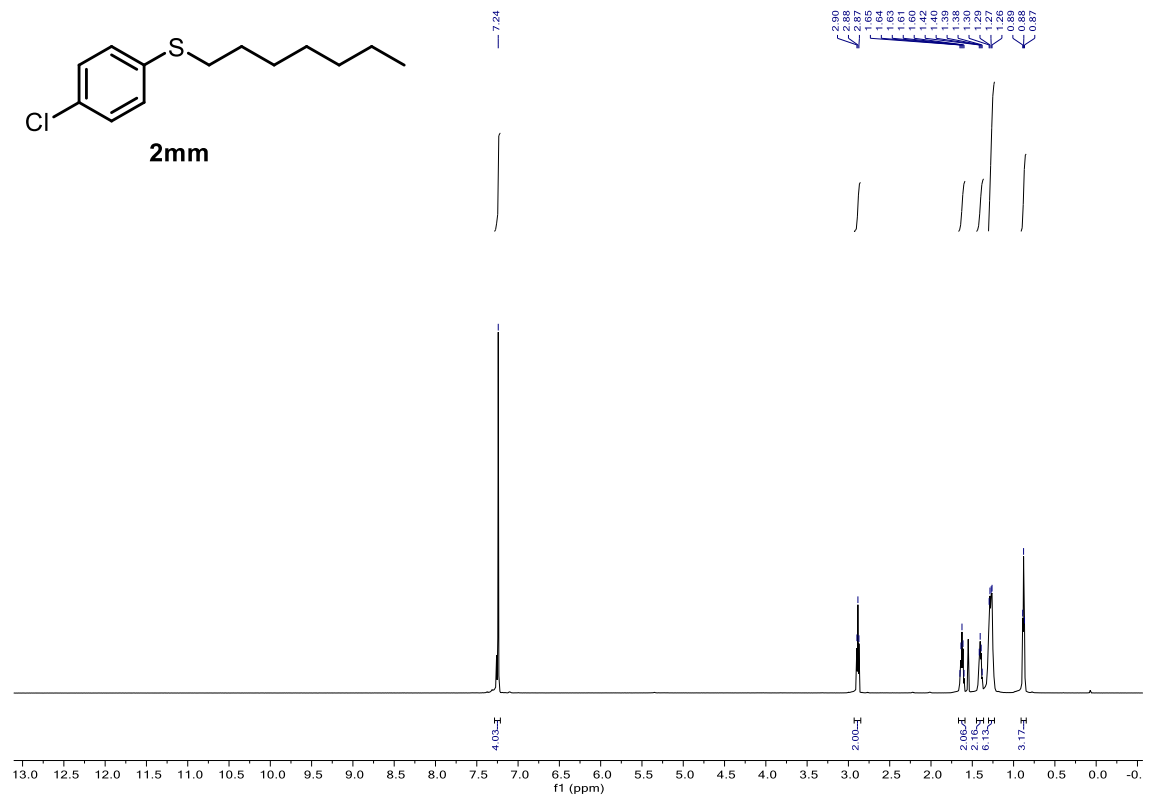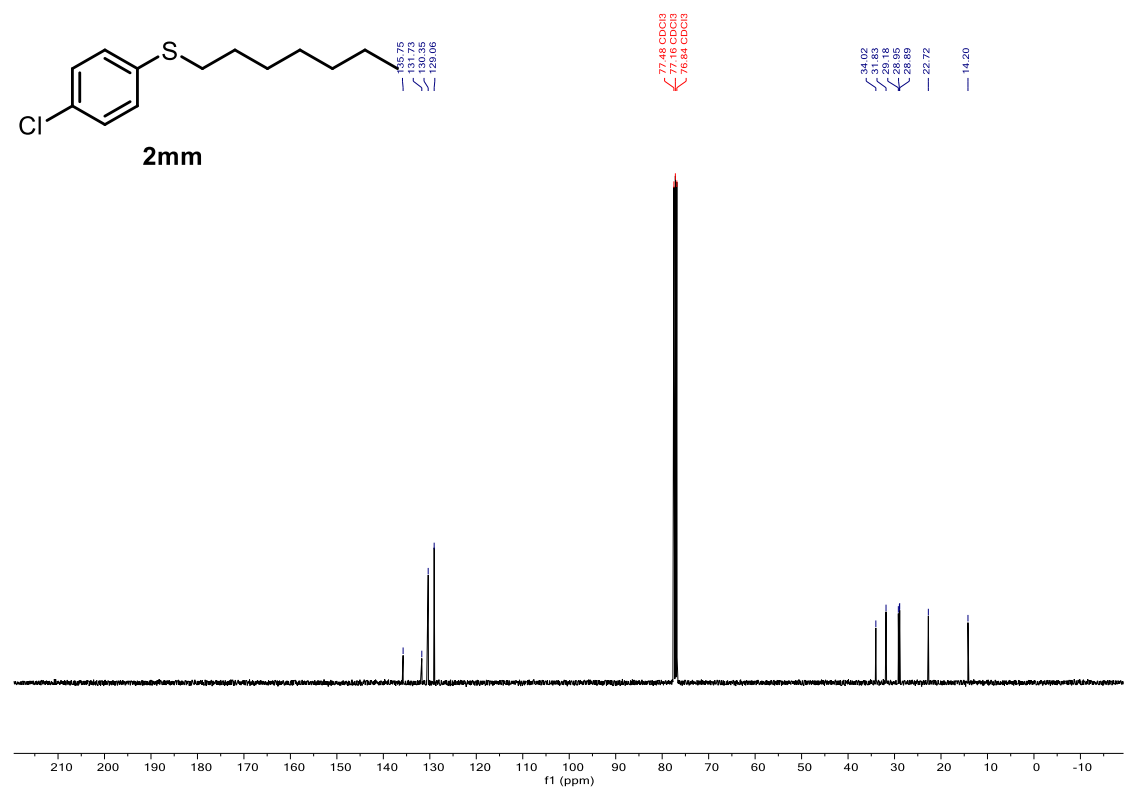

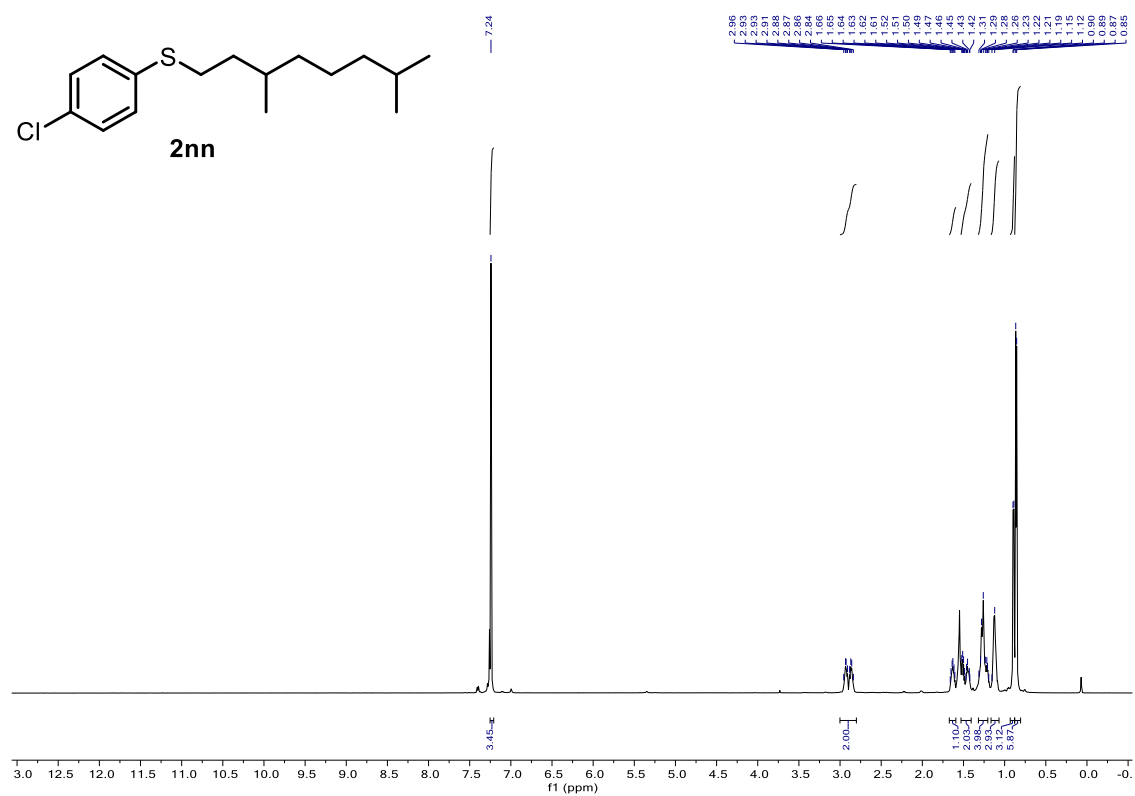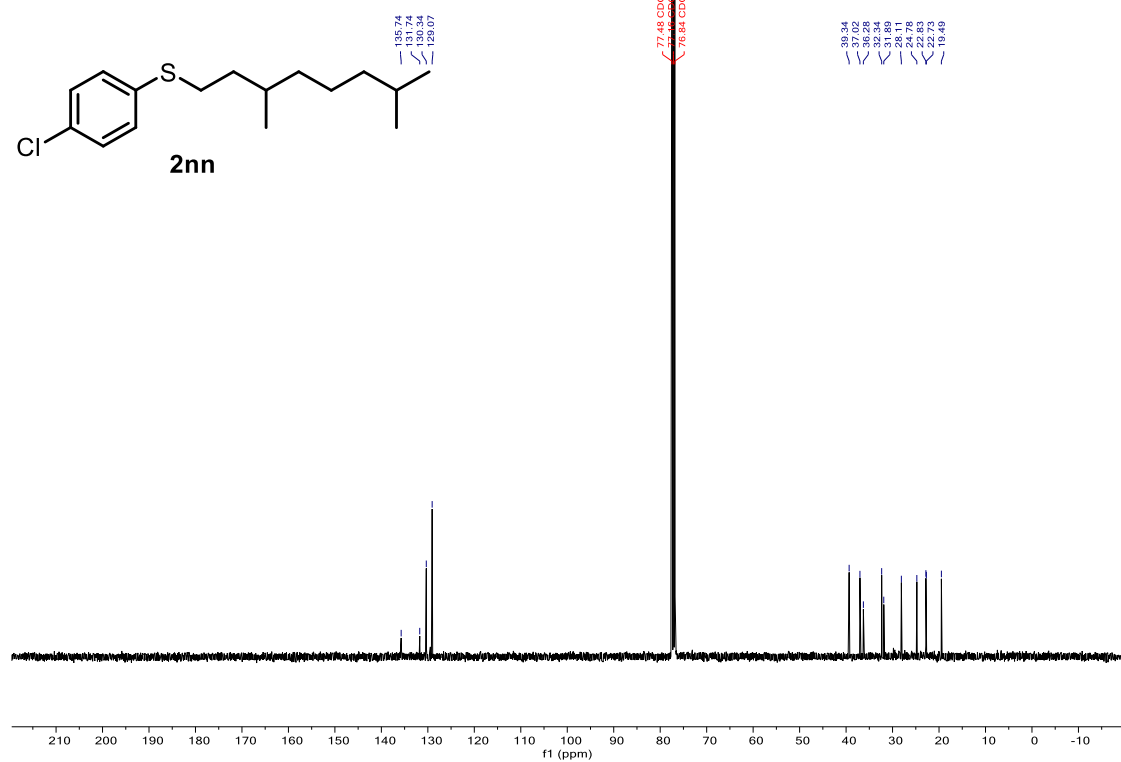

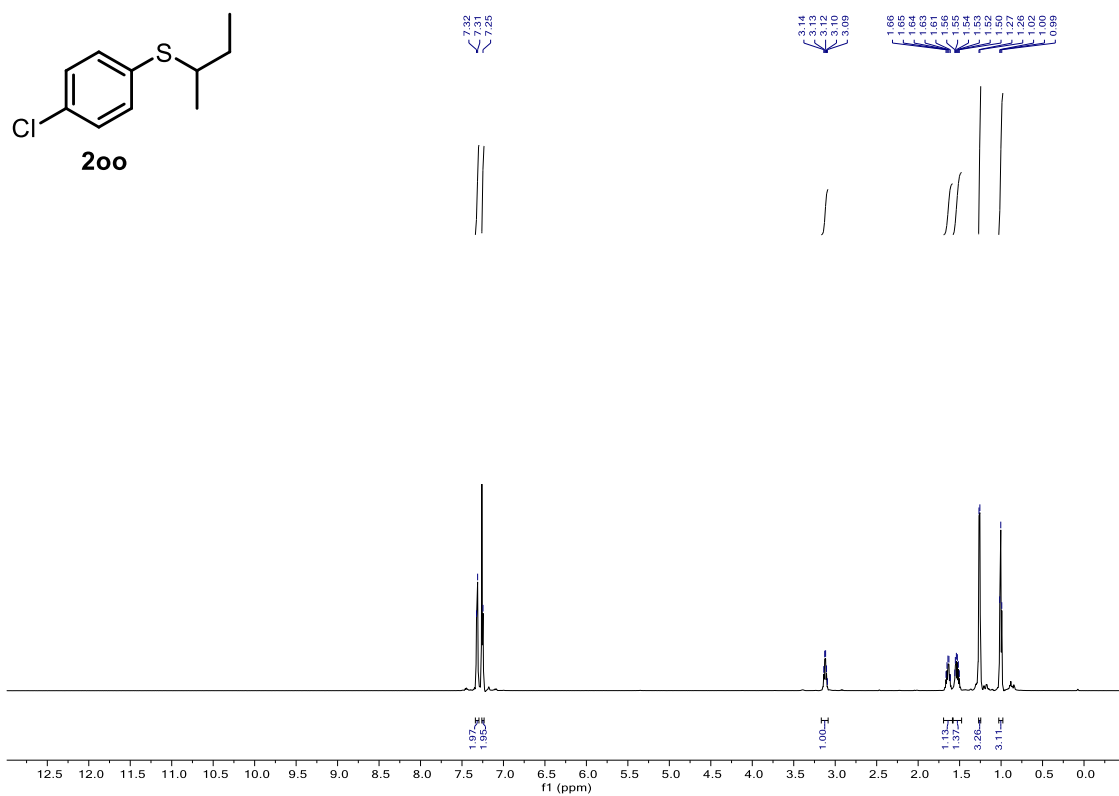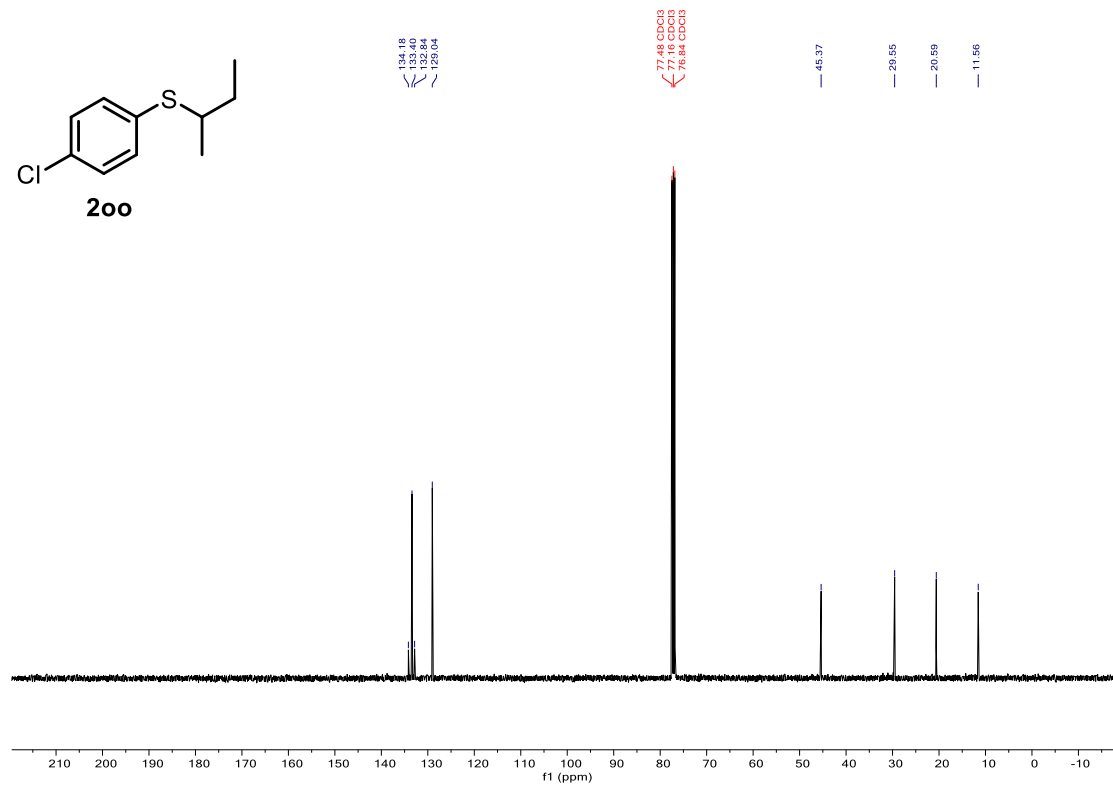

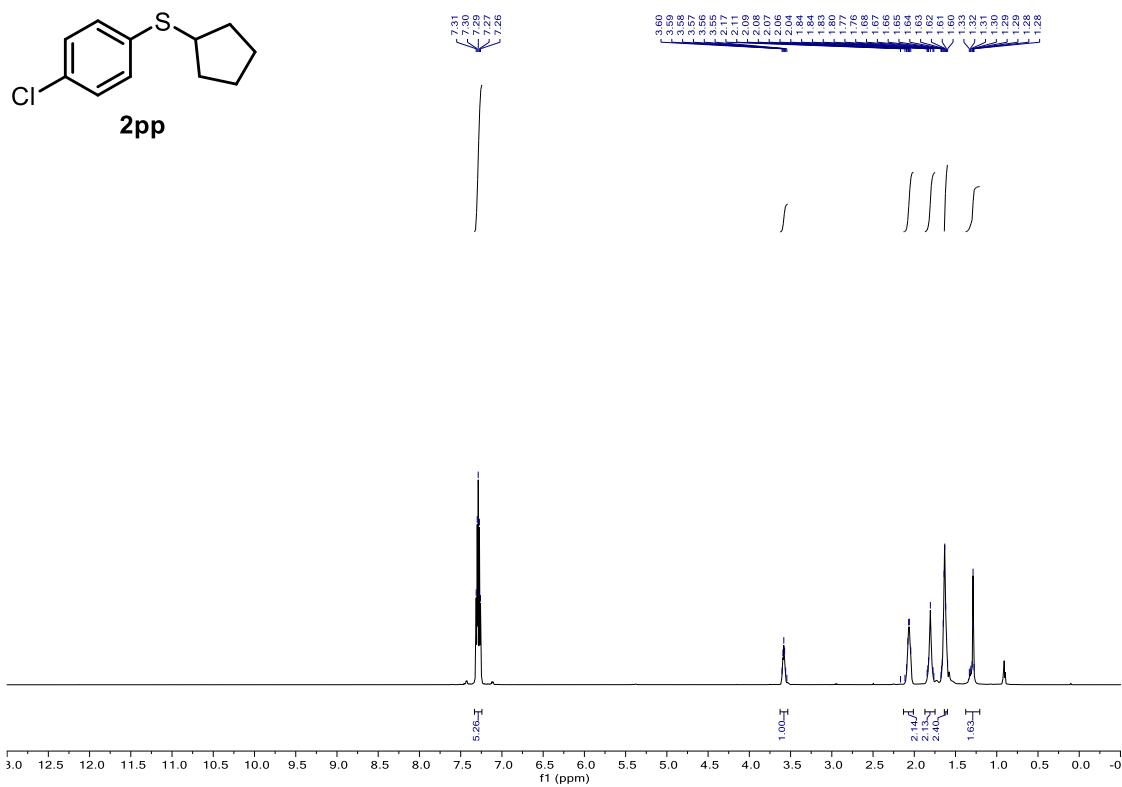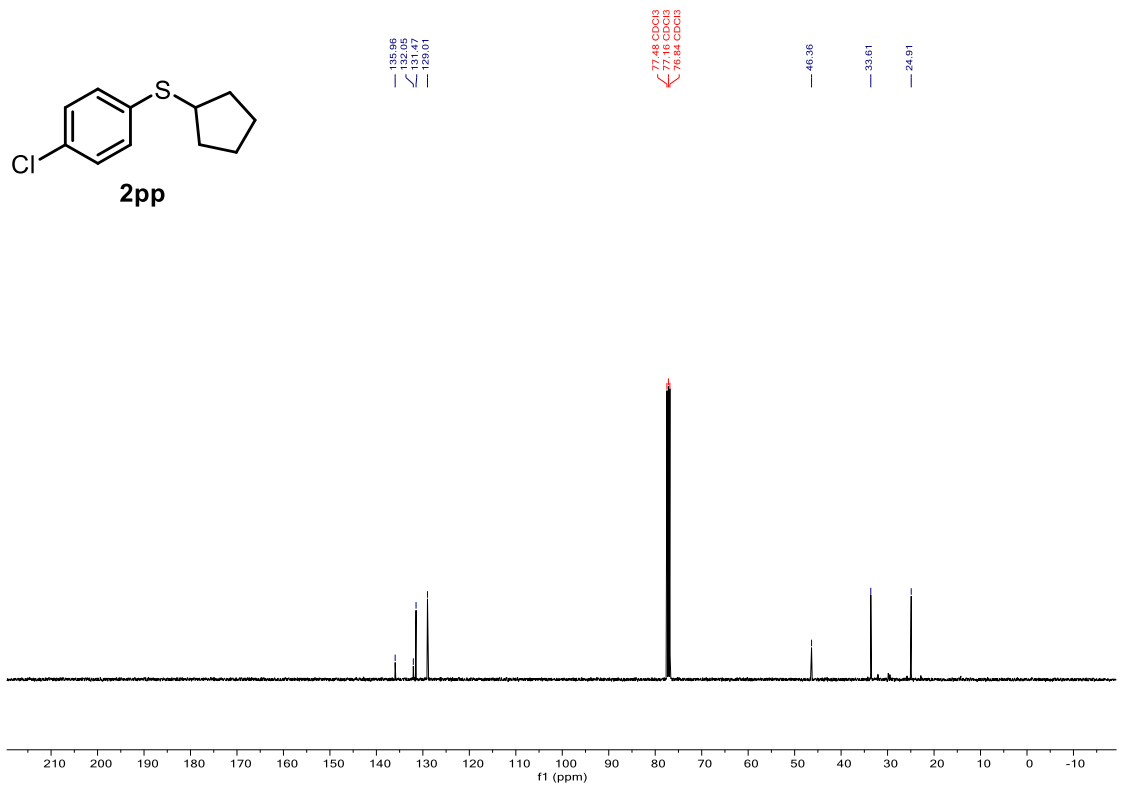



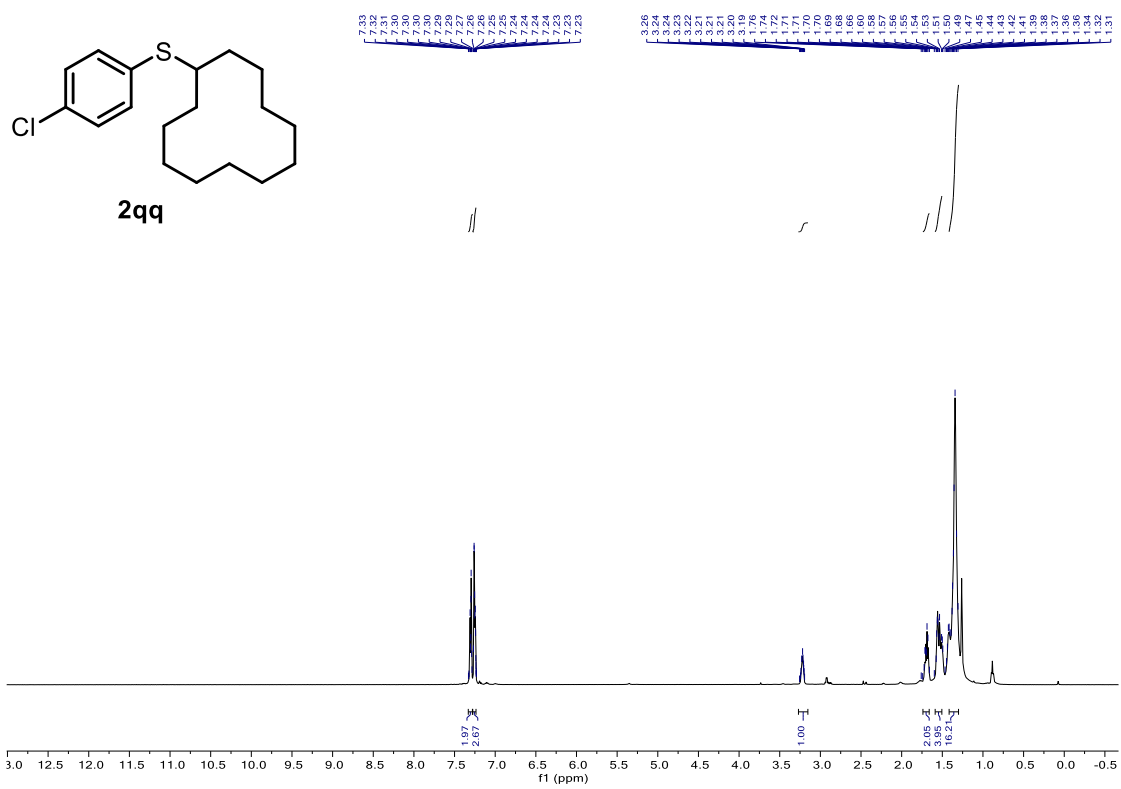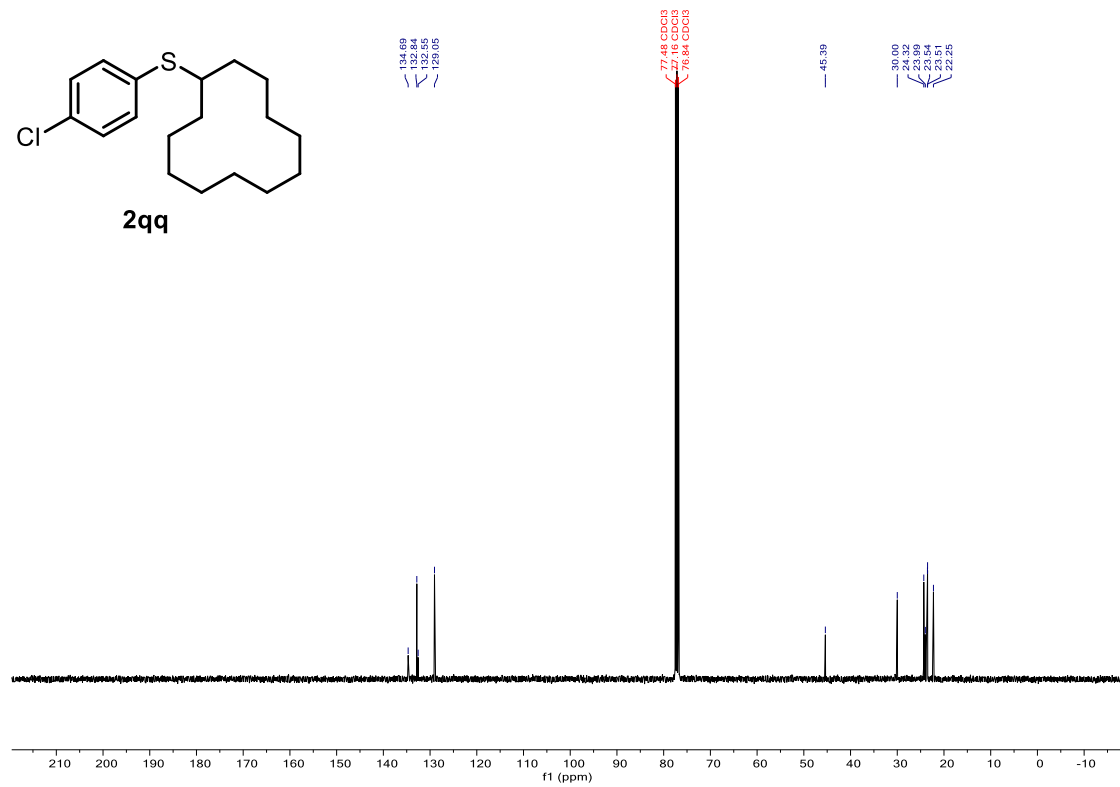

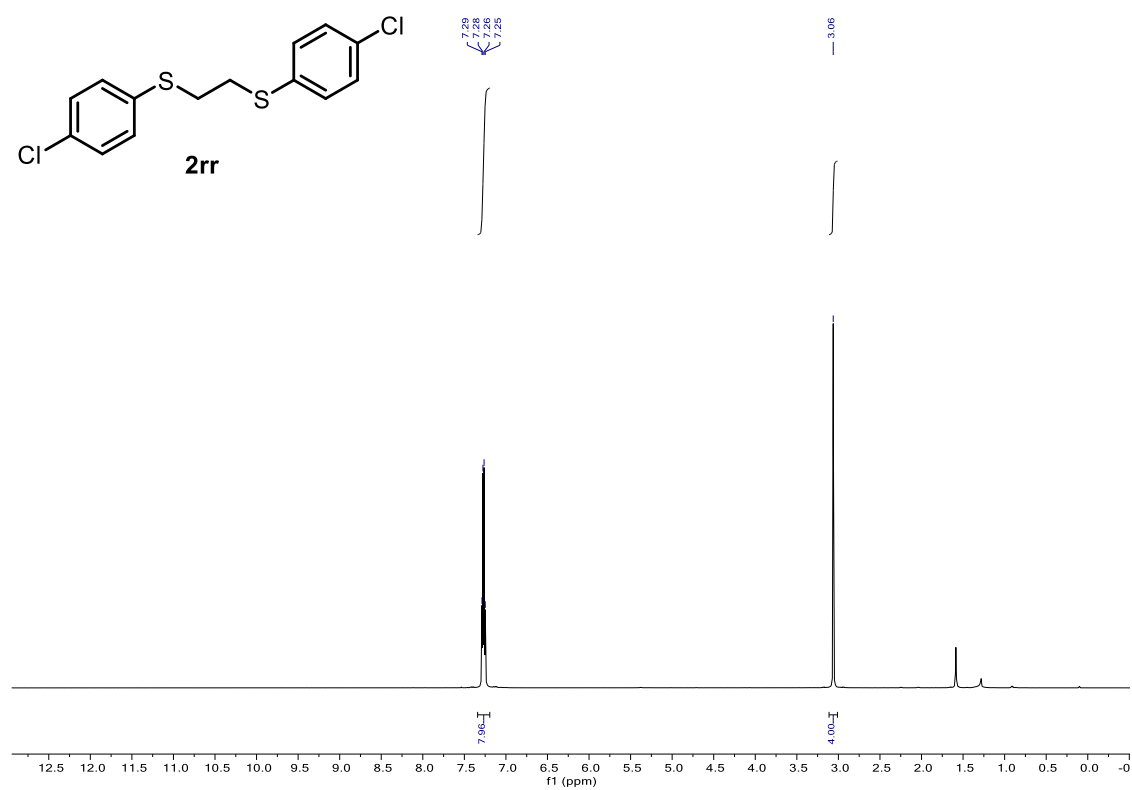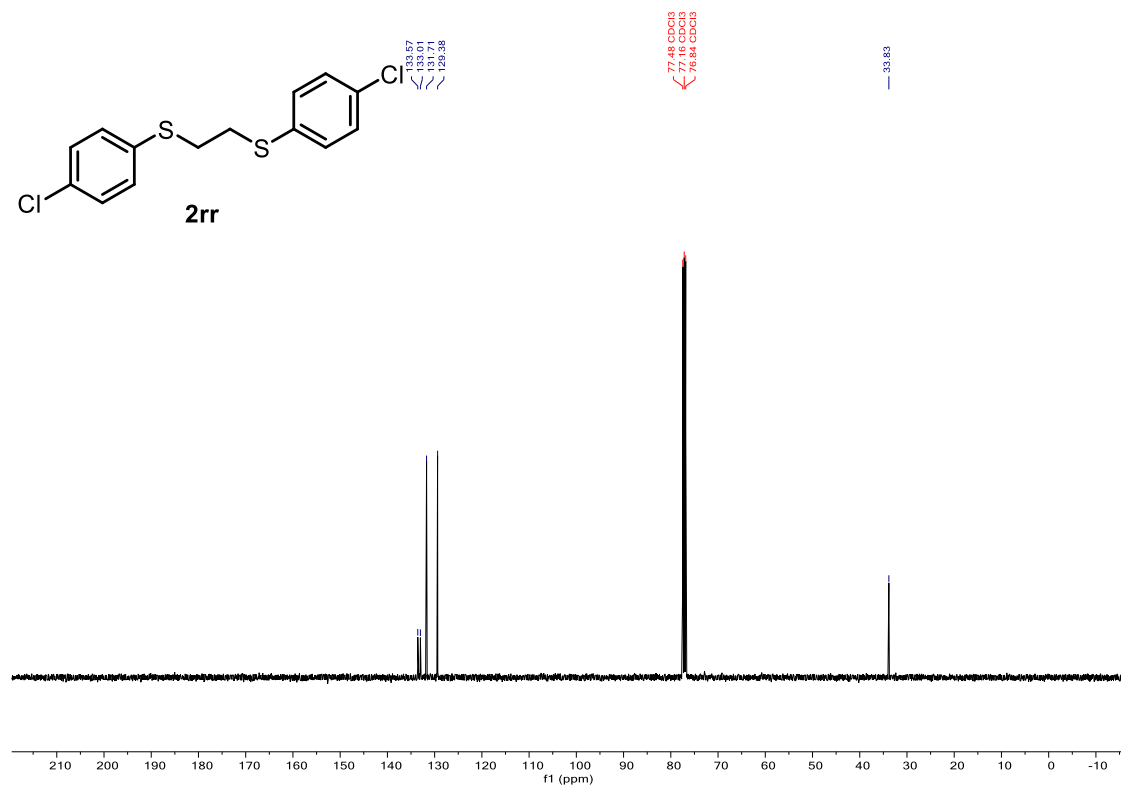

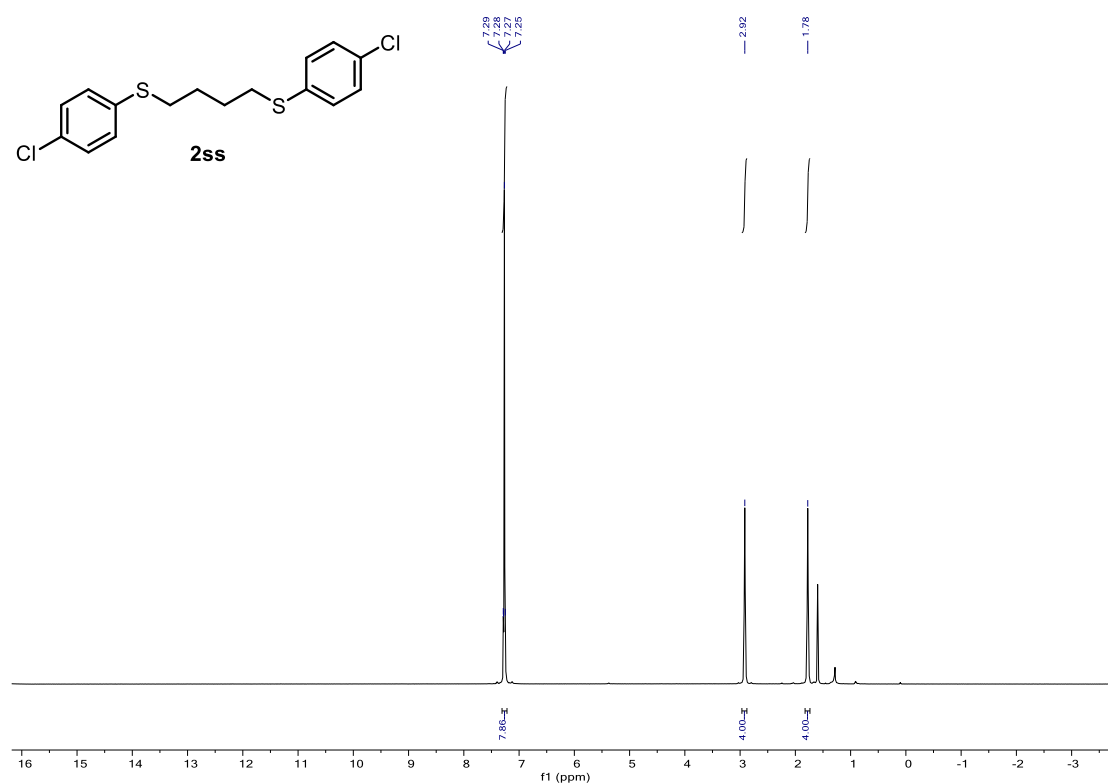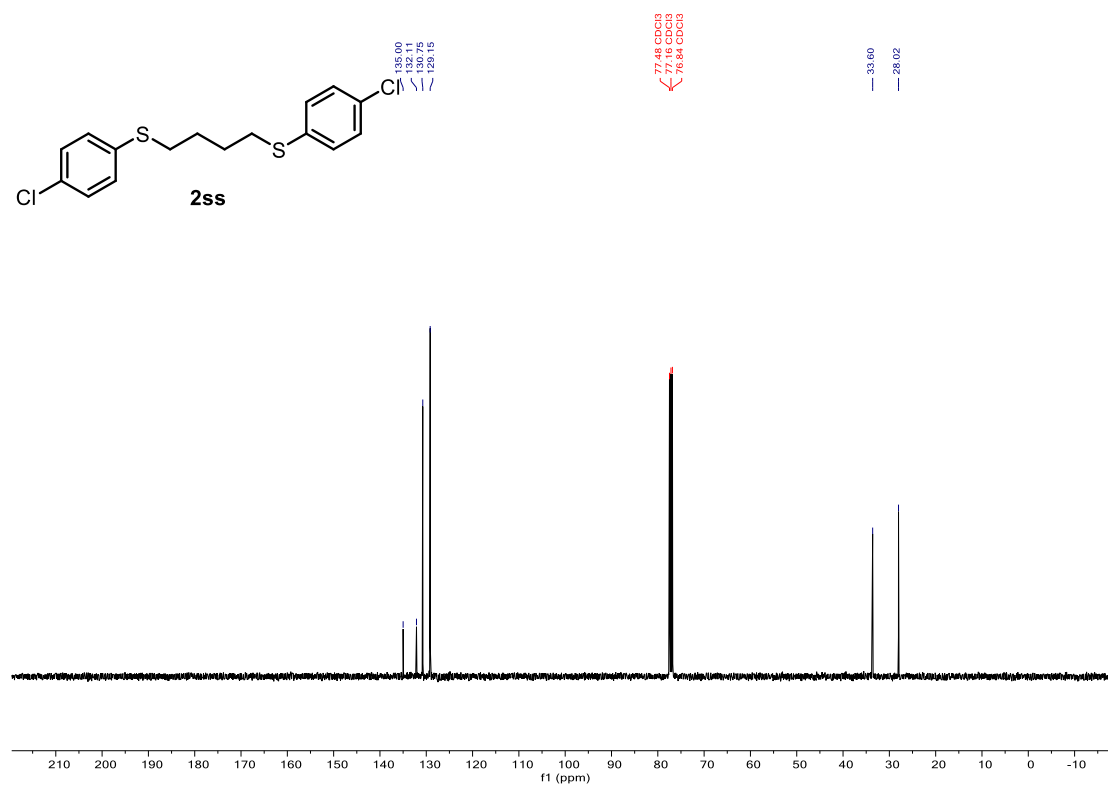

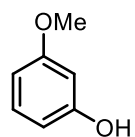

4b

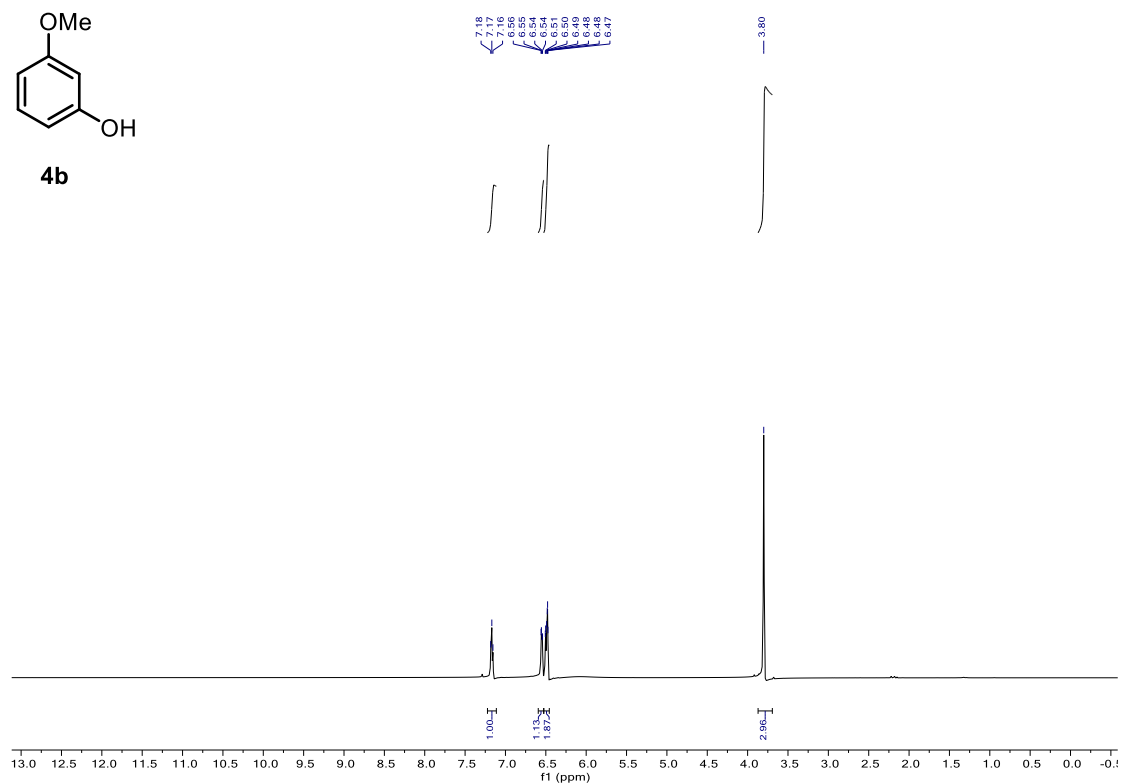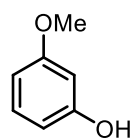

4b

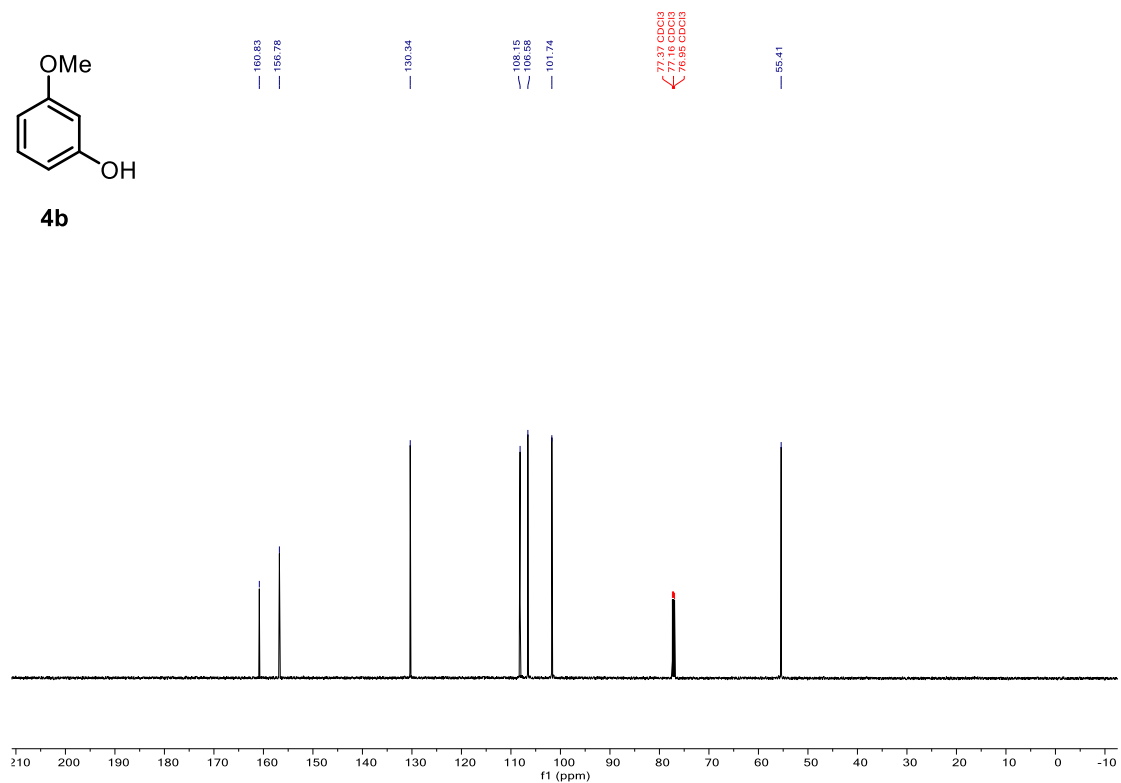

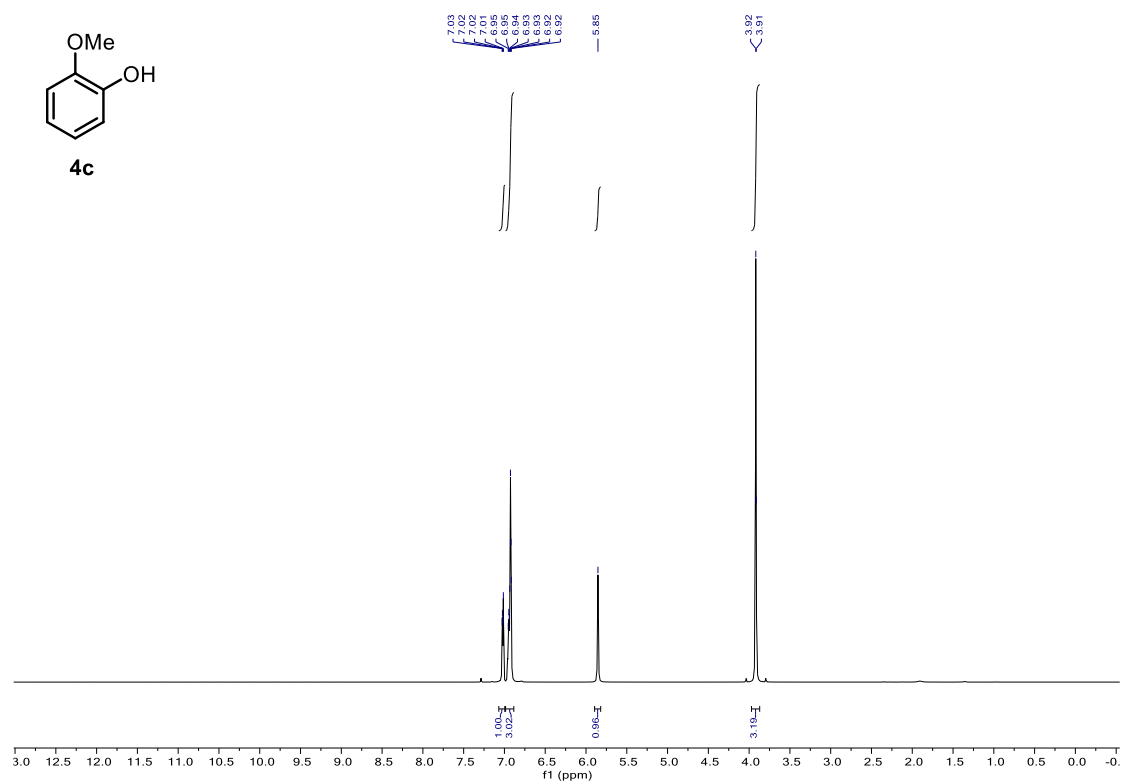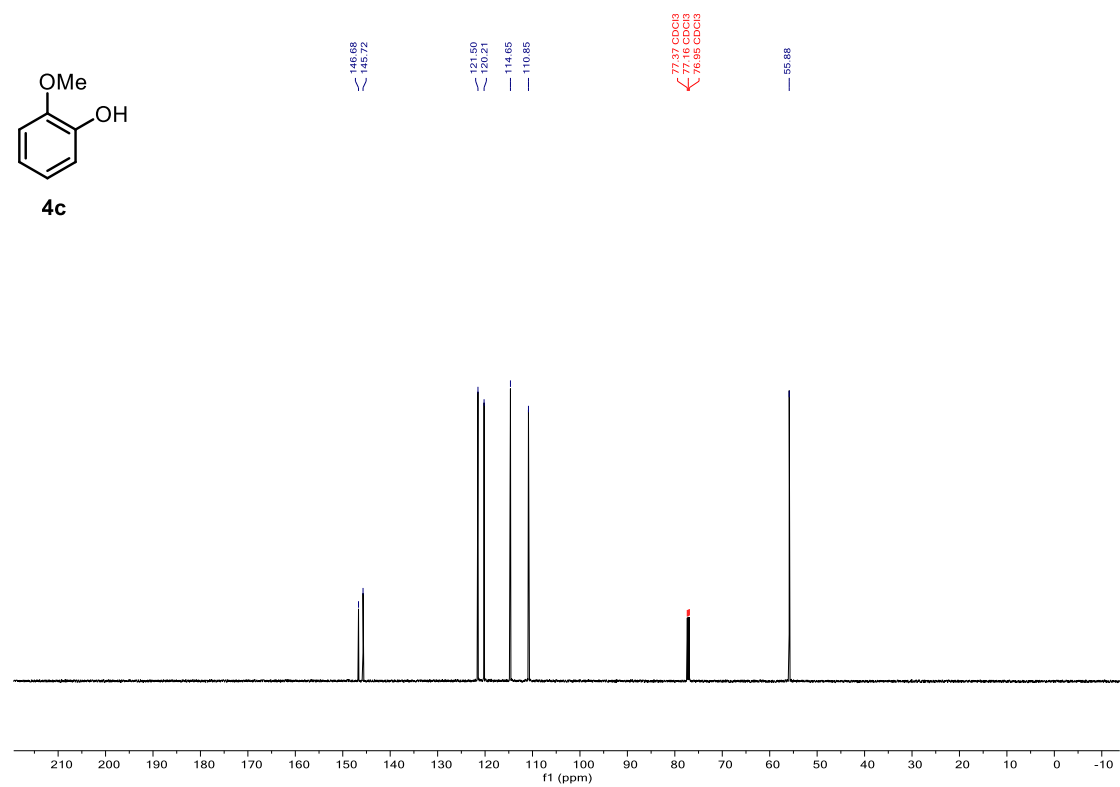

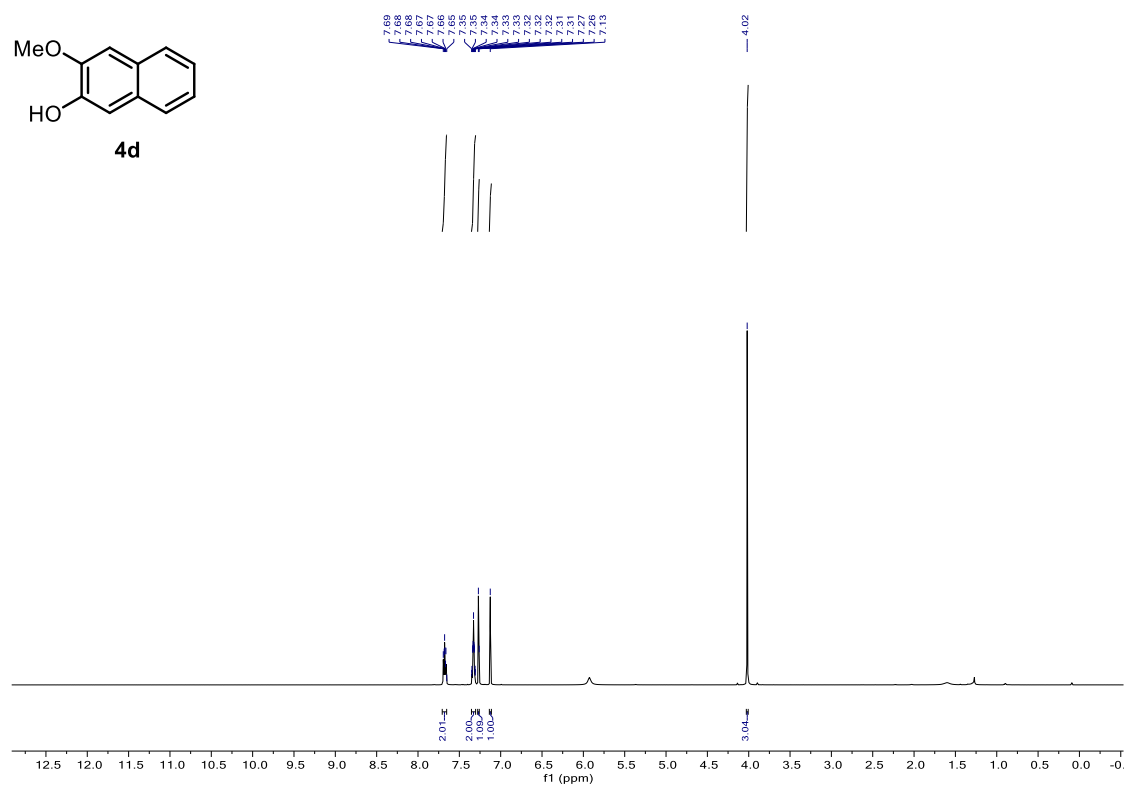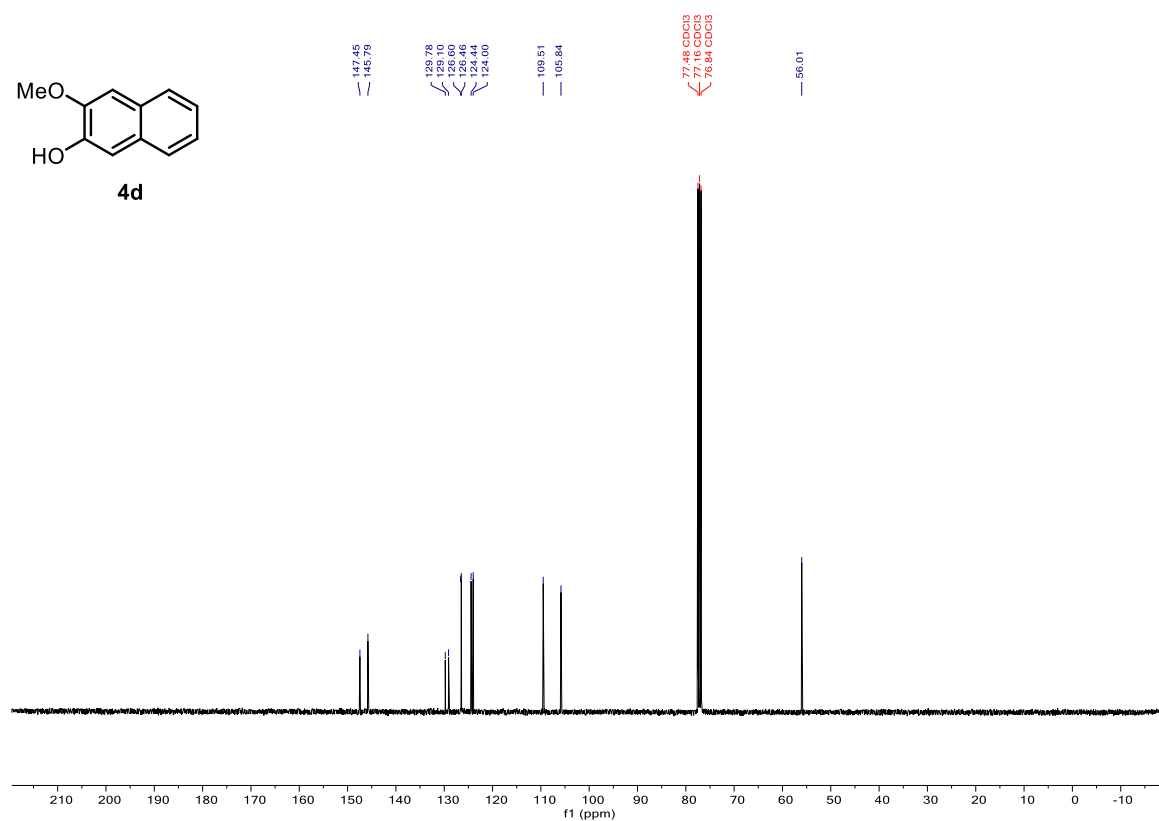

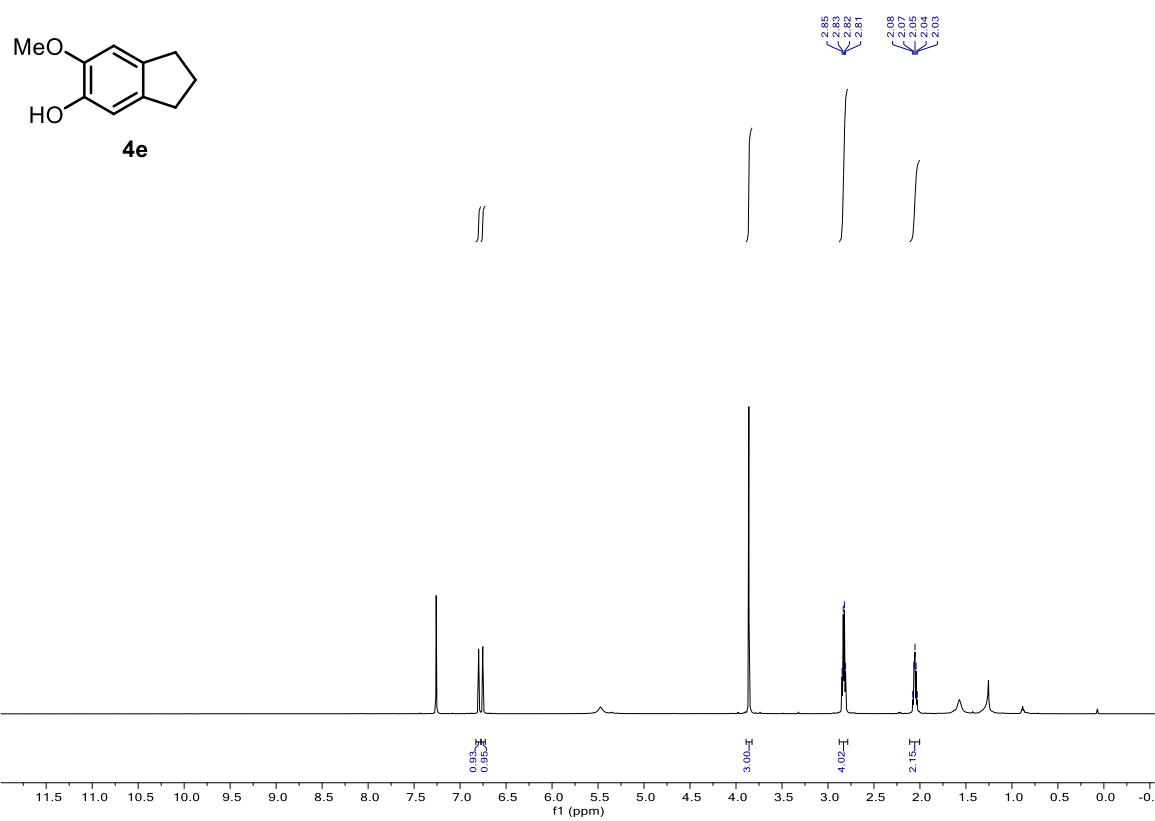

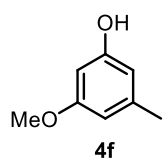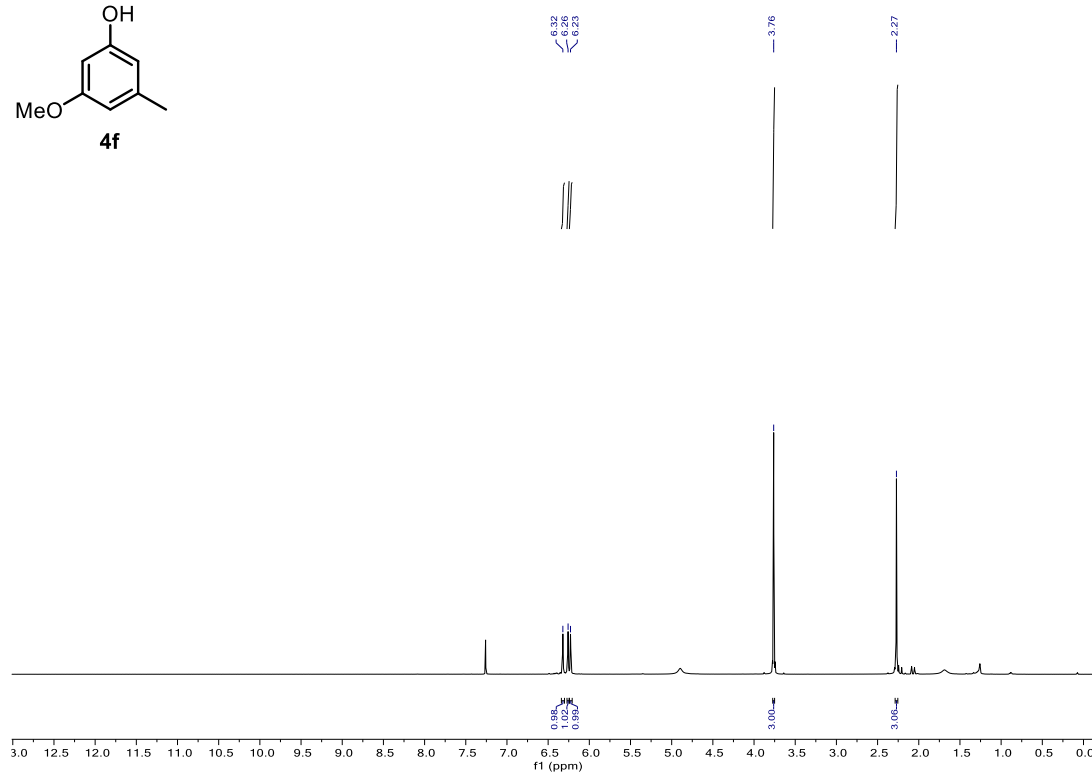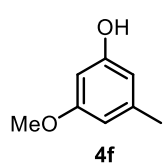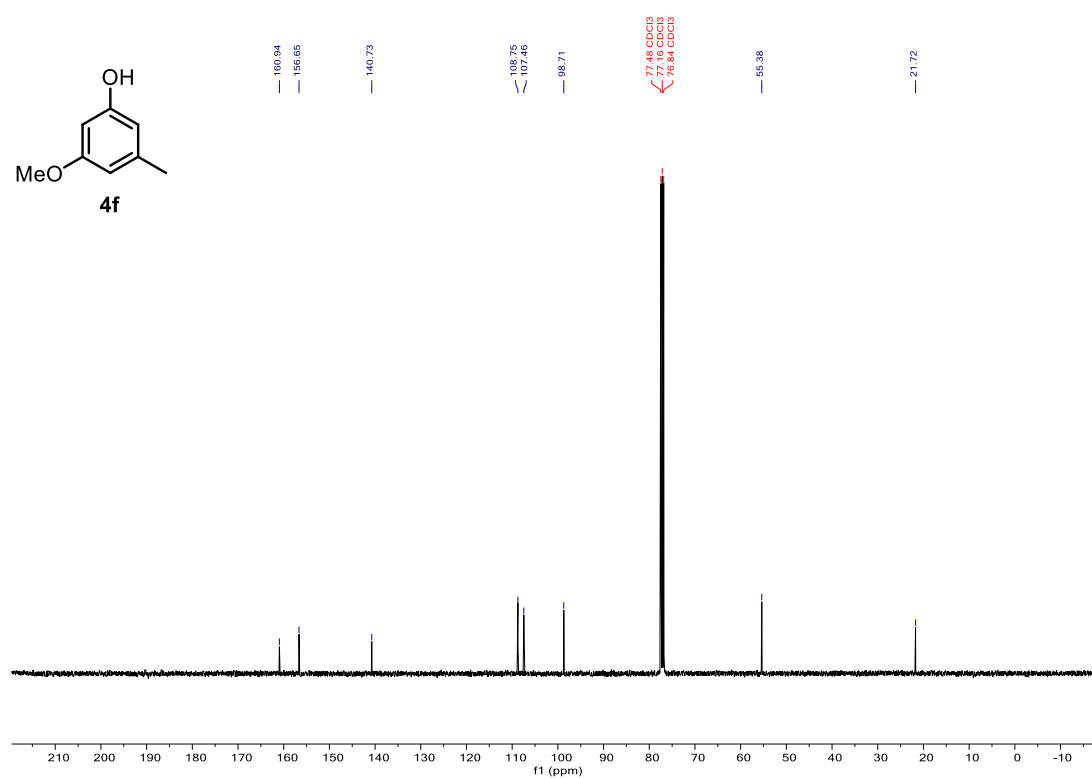



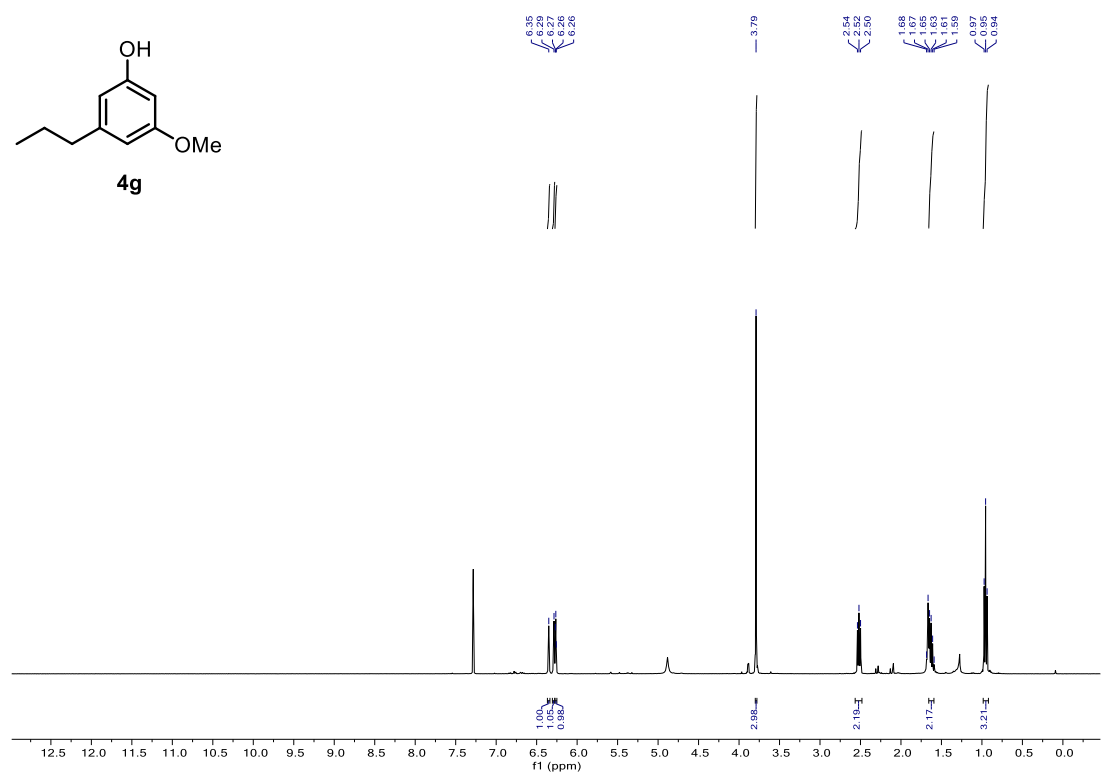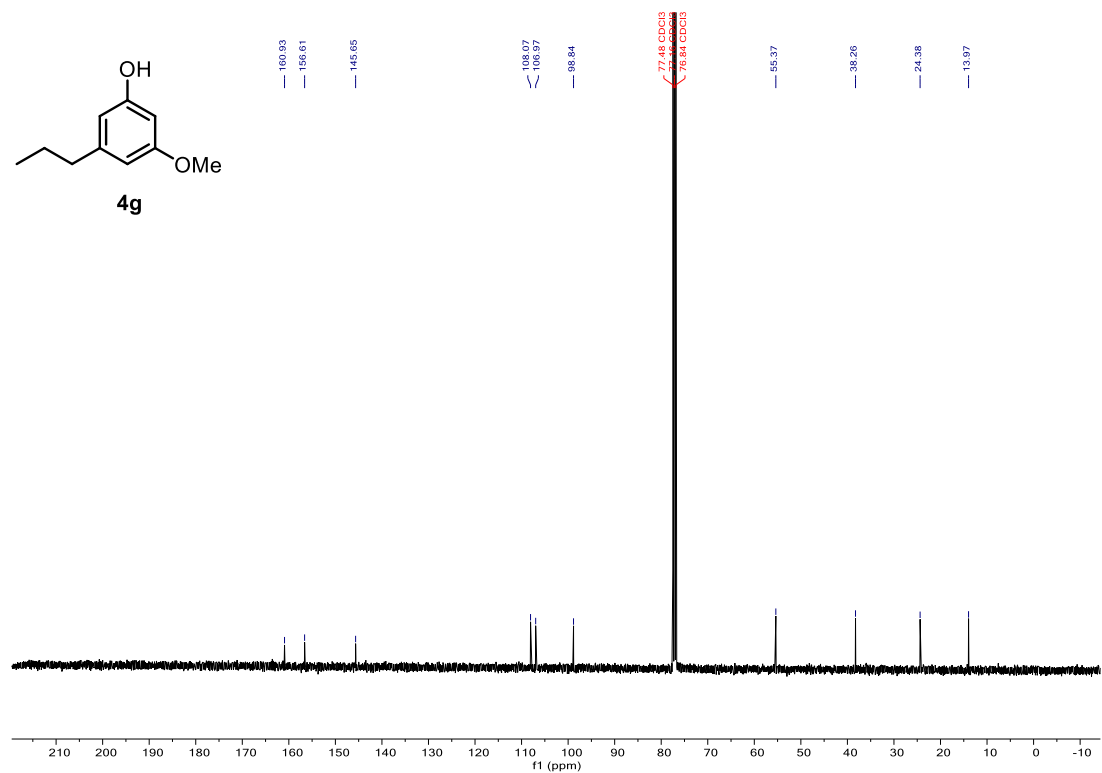

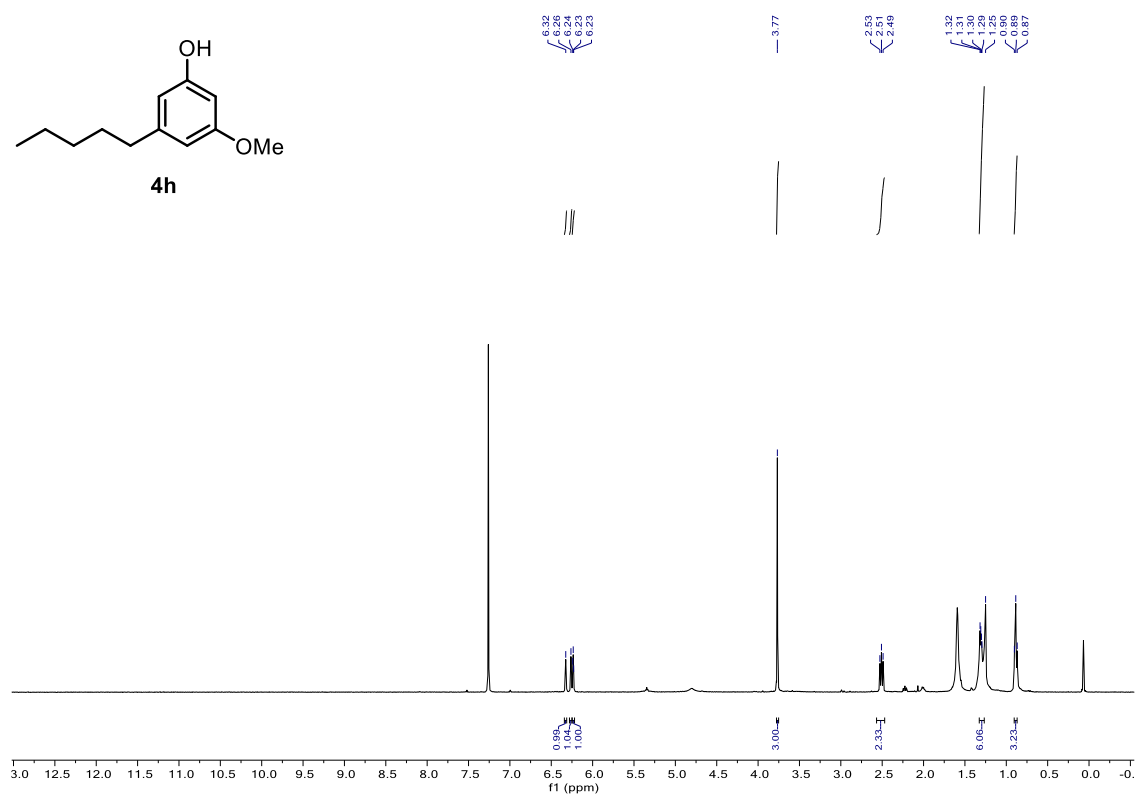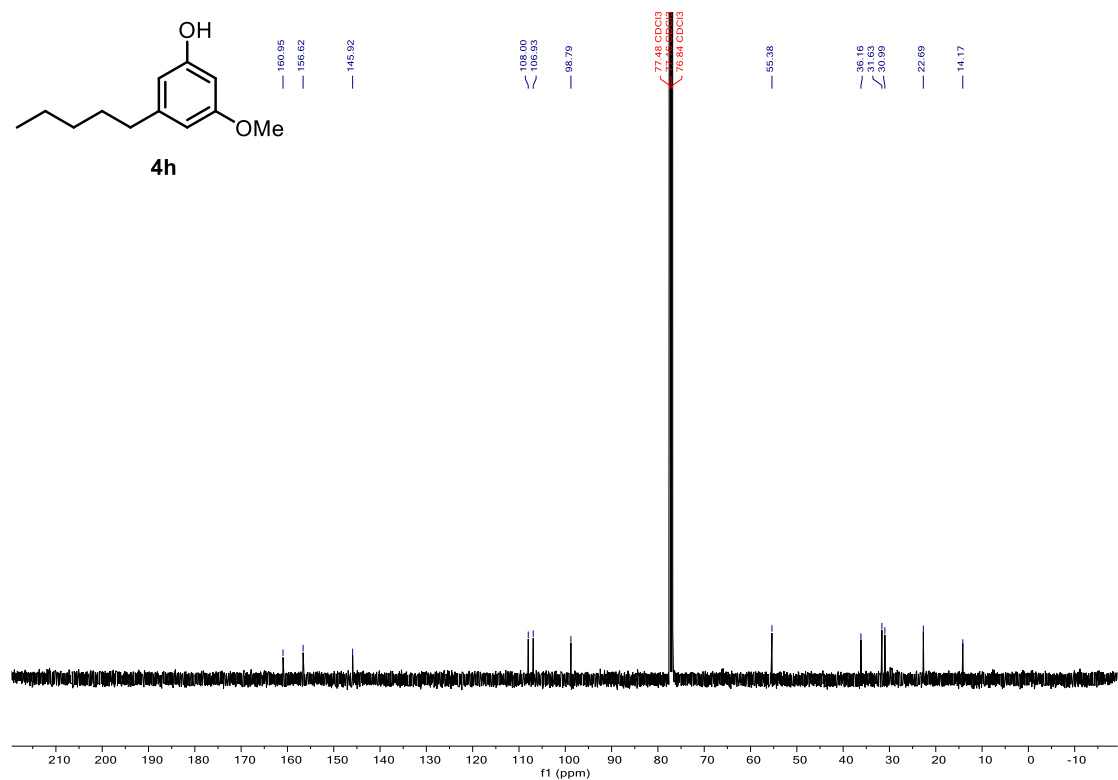

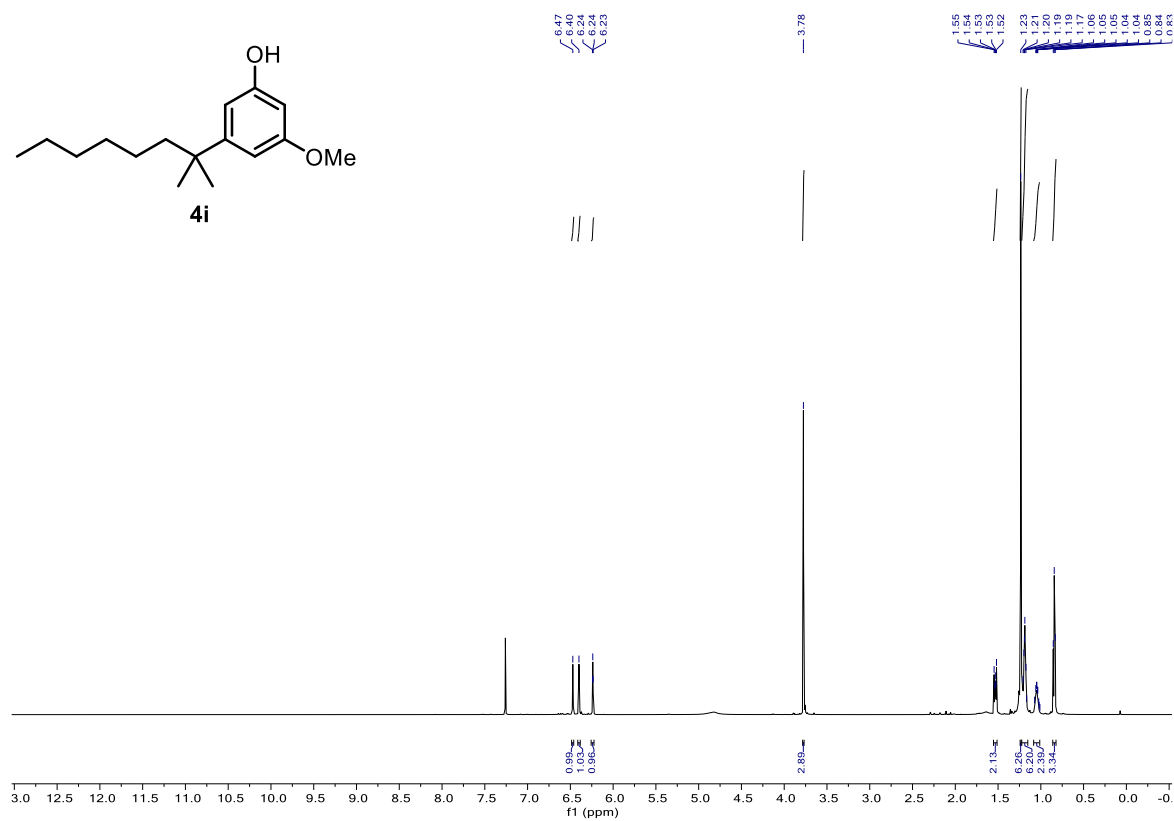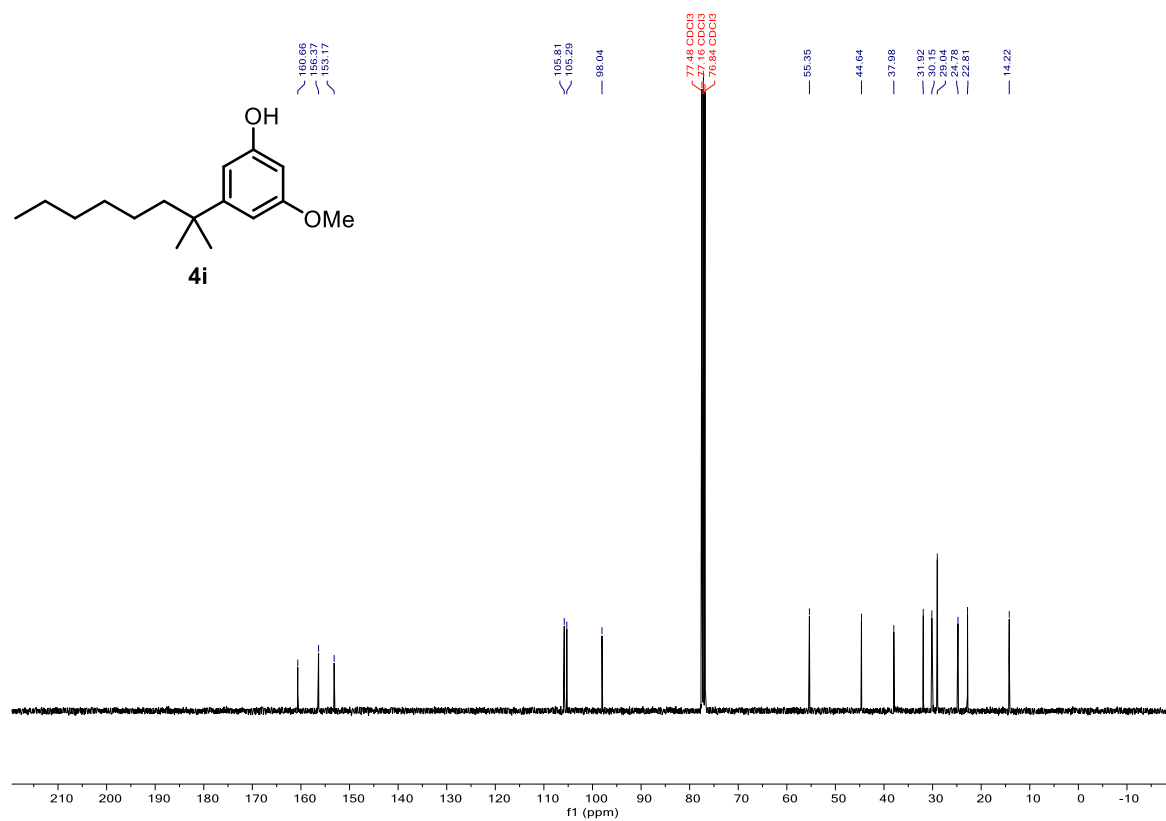

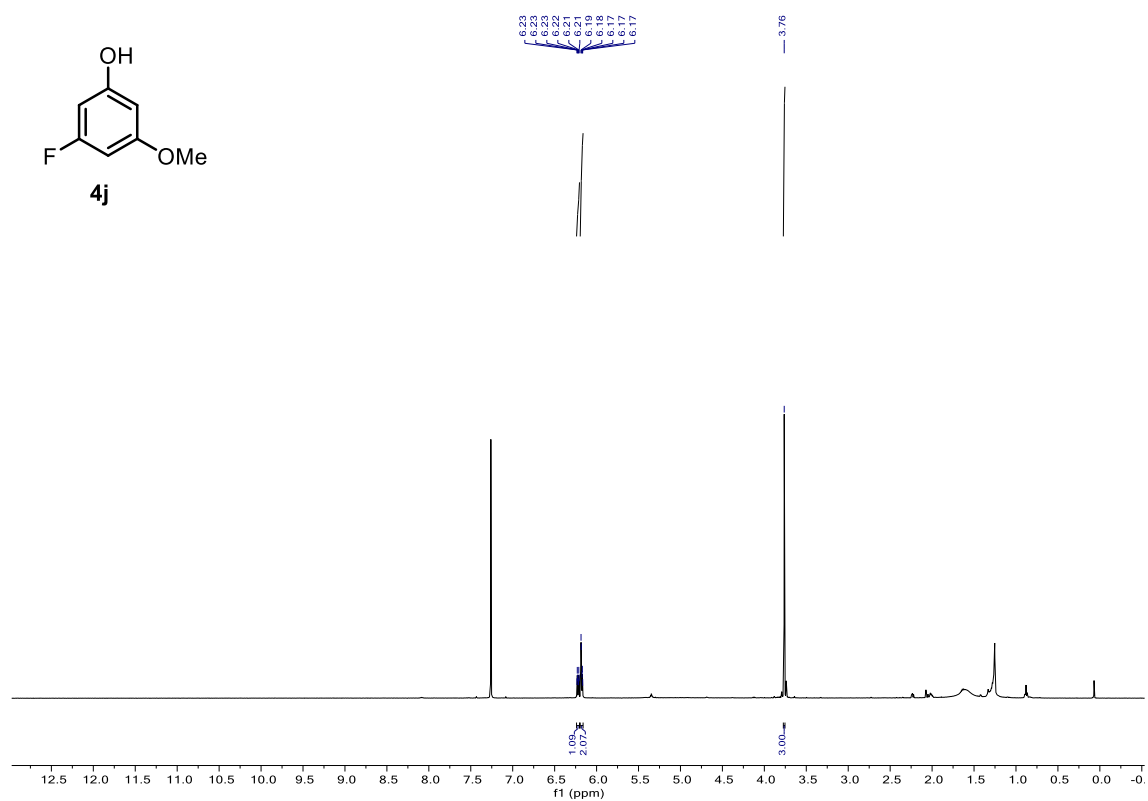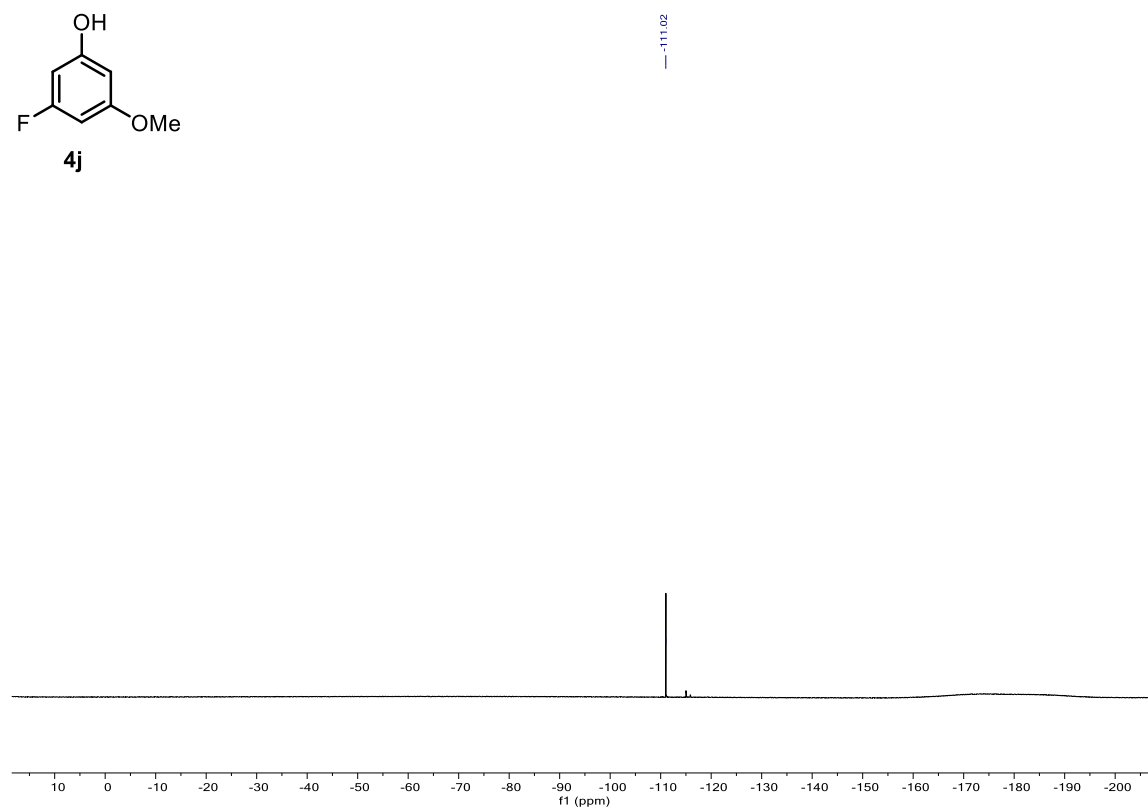

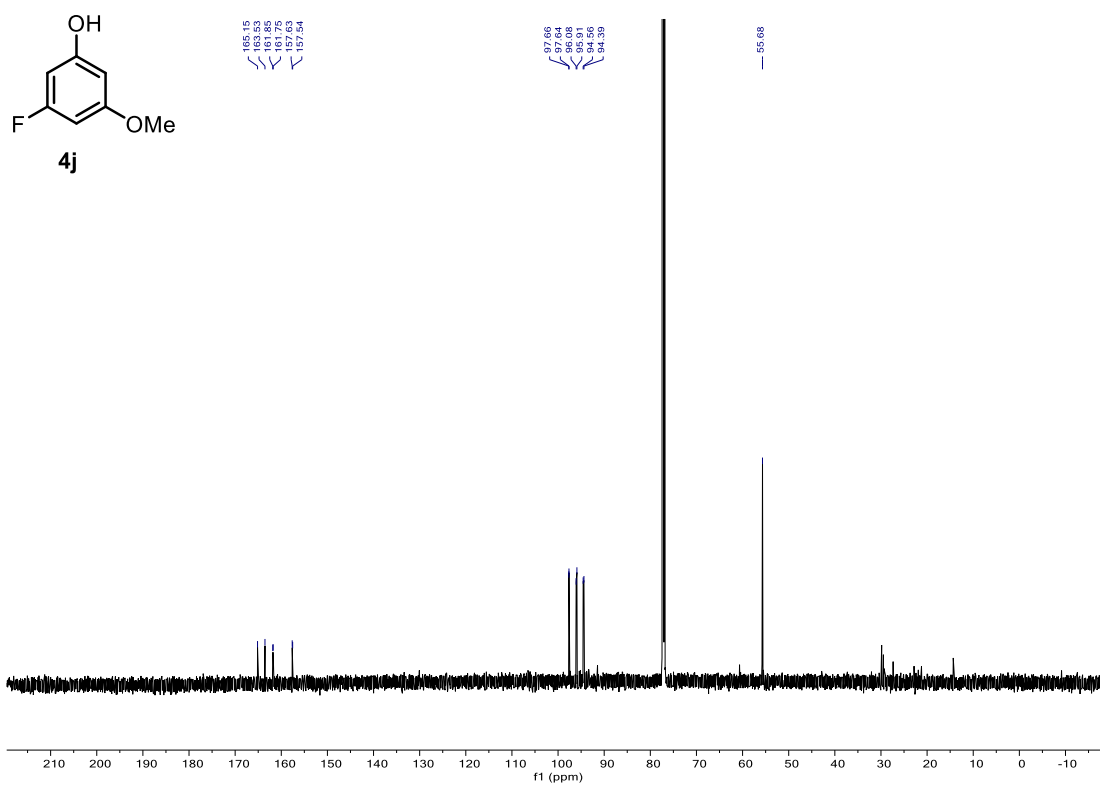

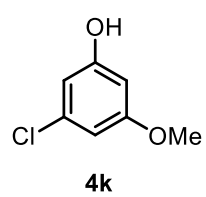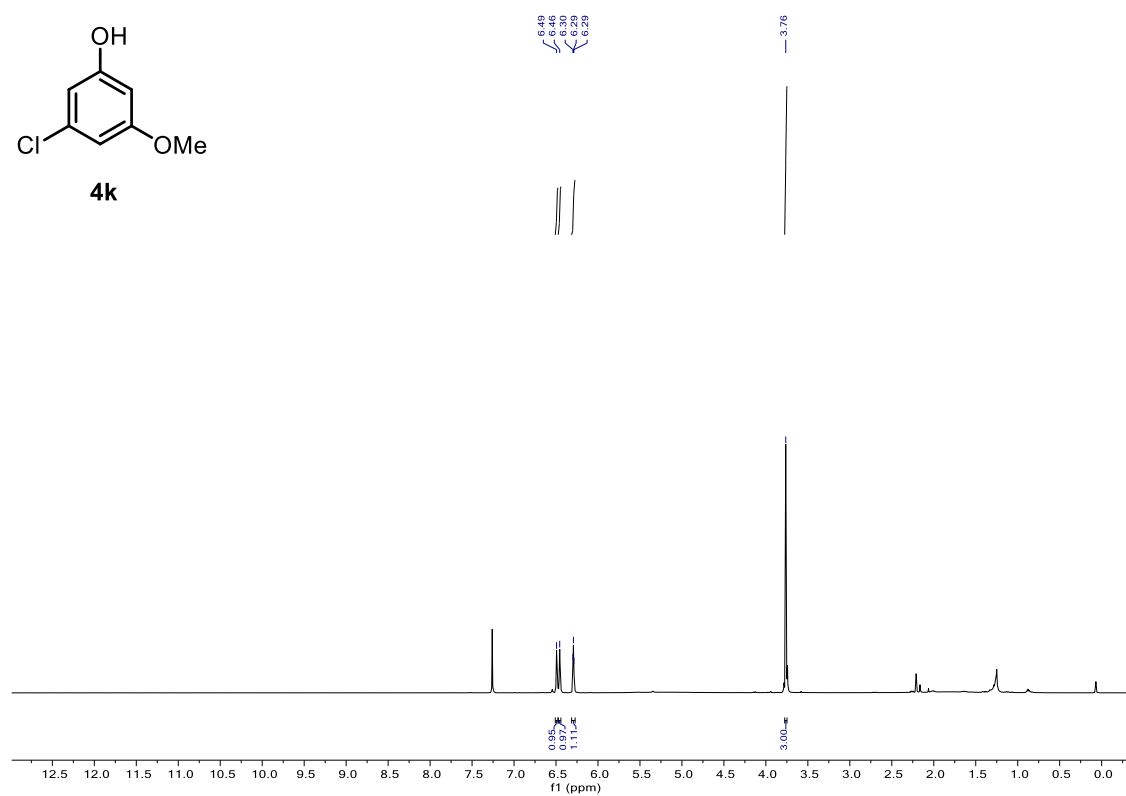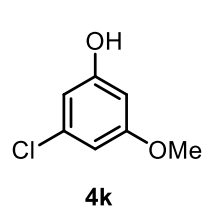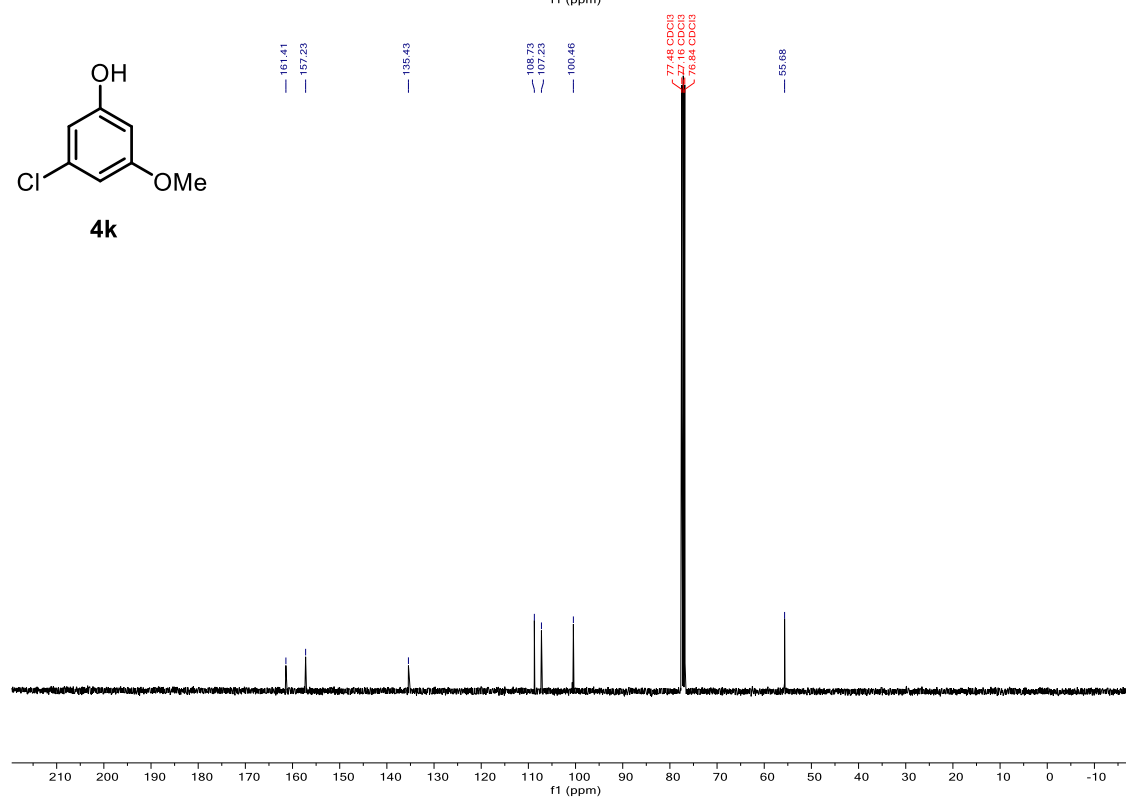

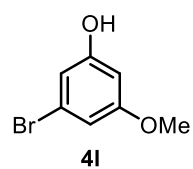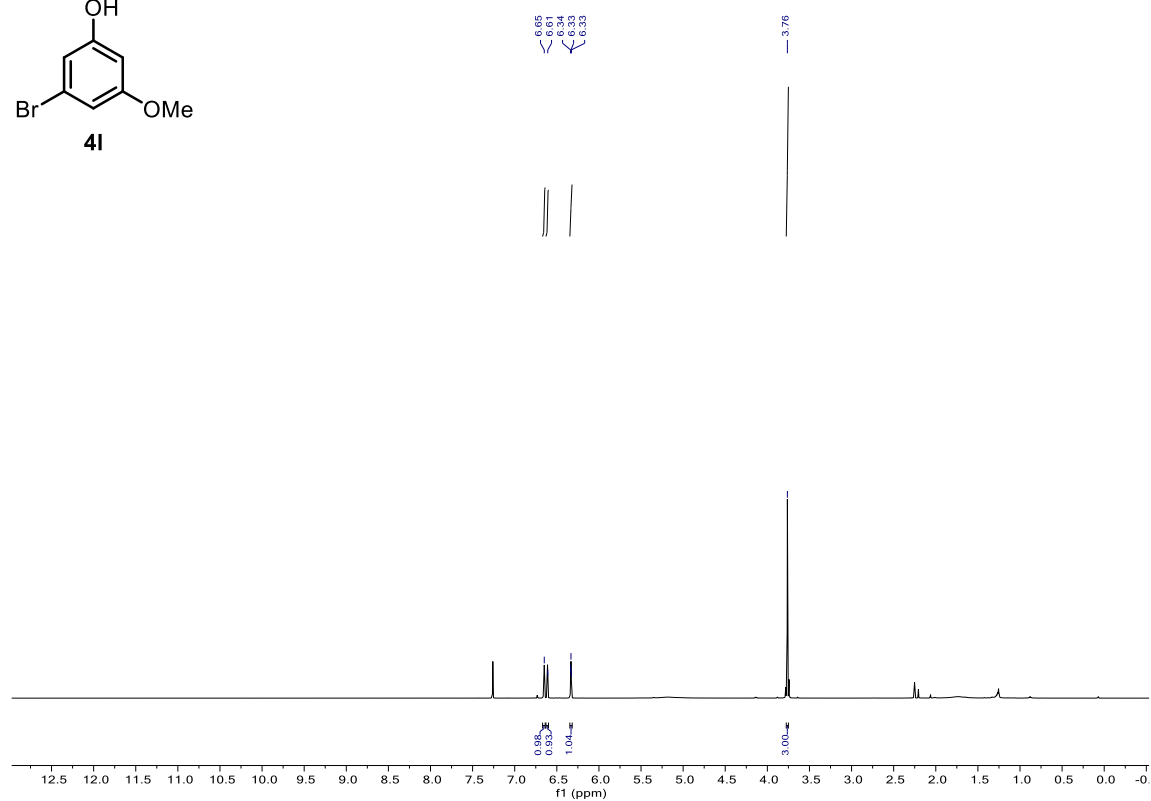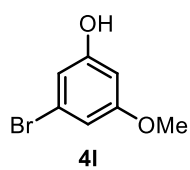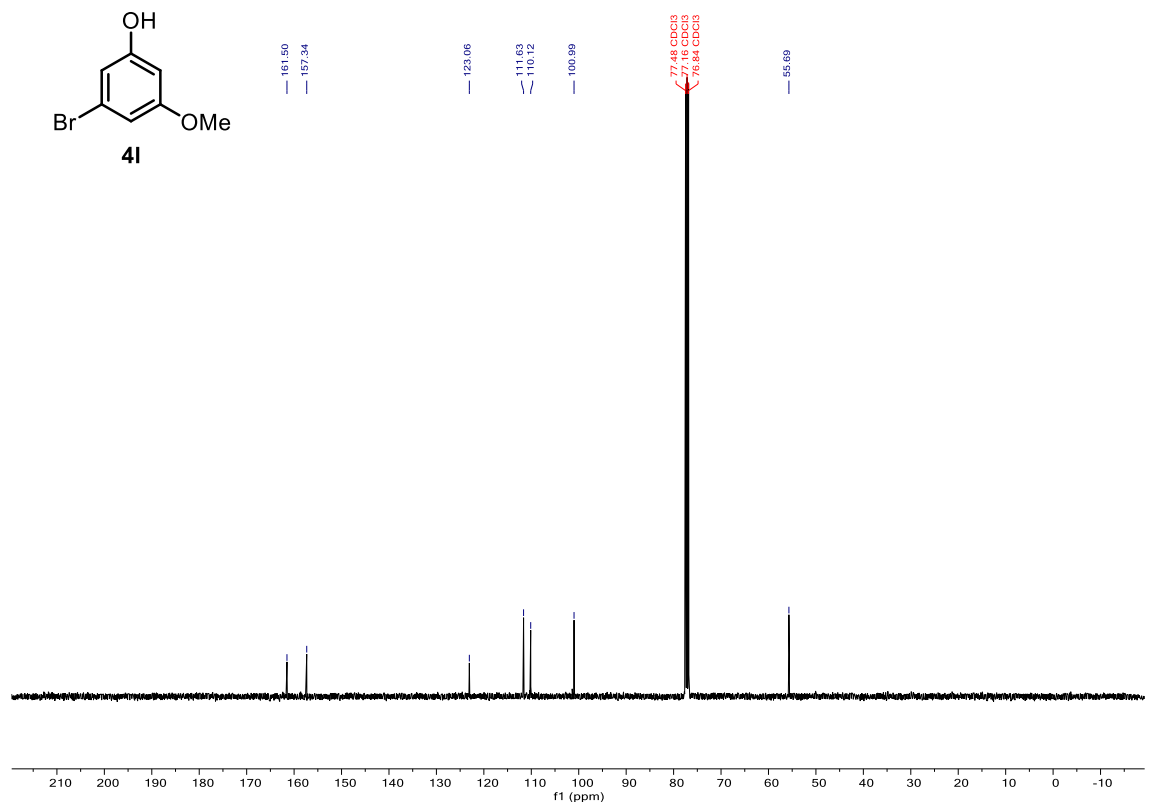

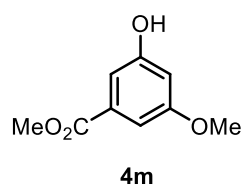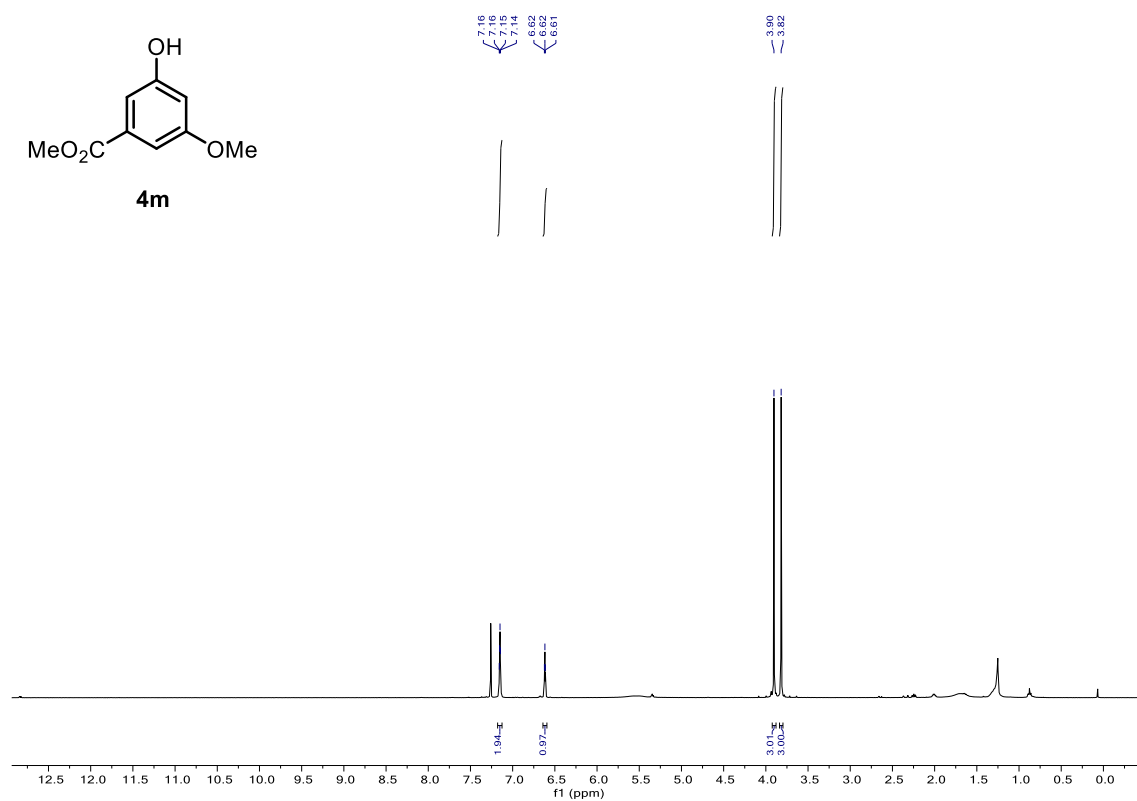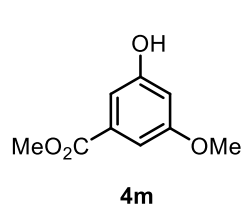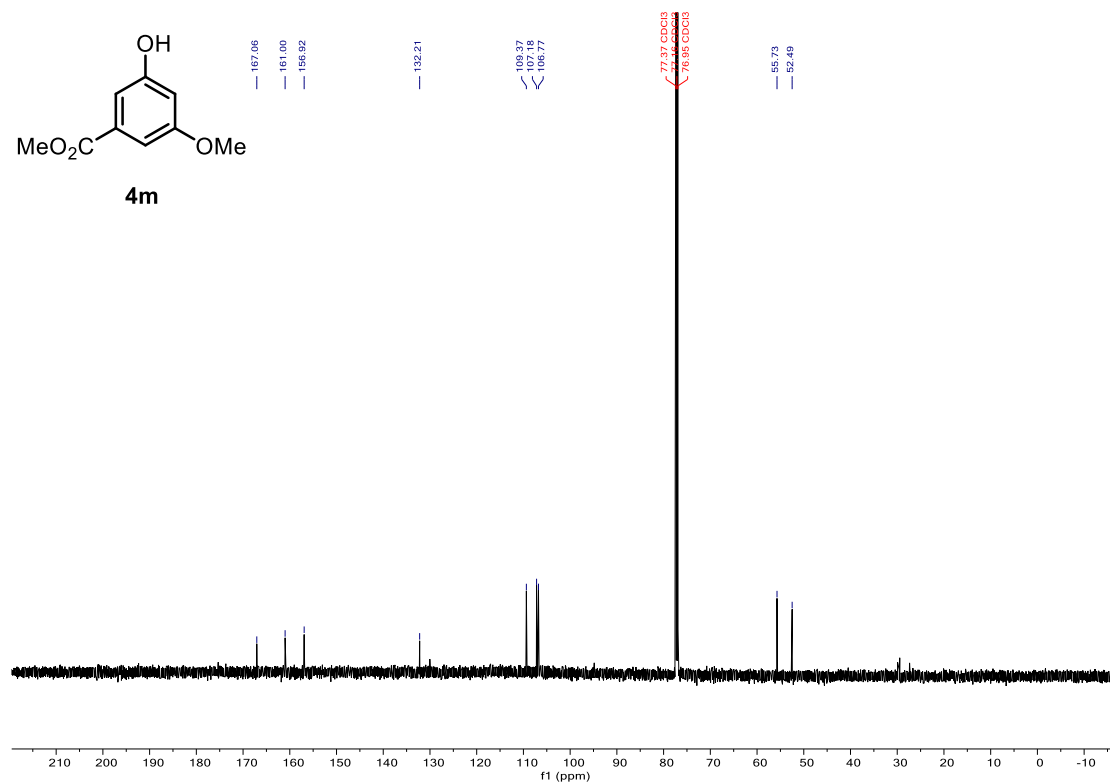



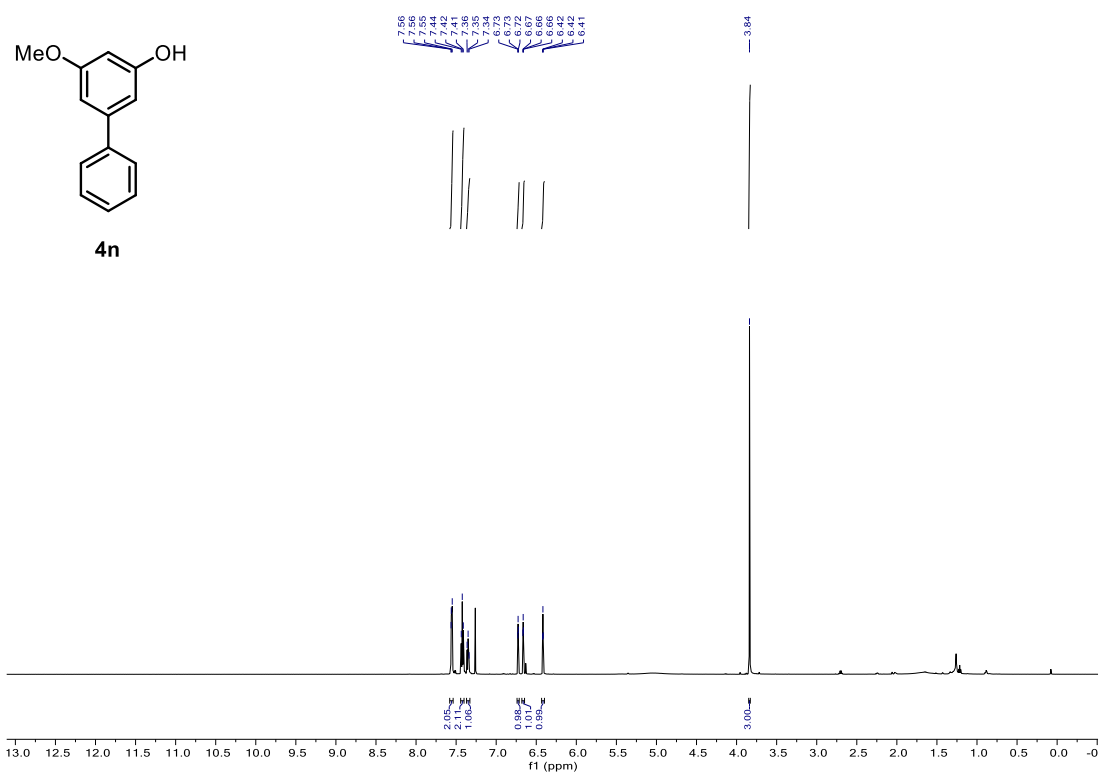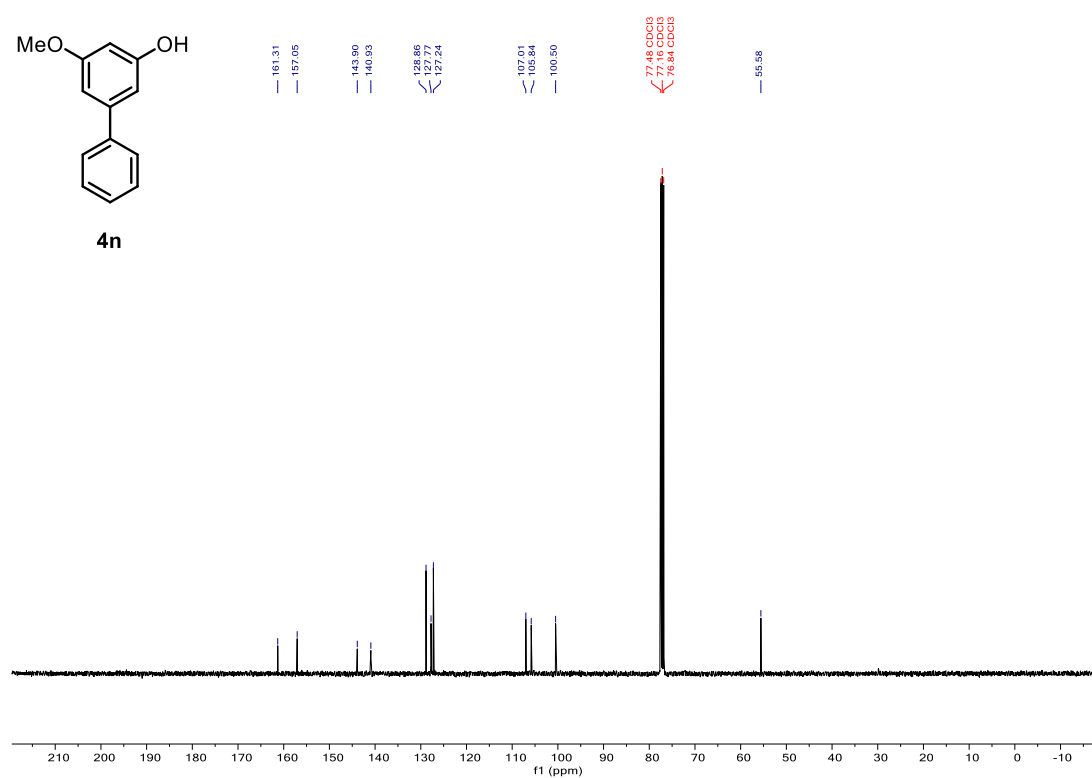

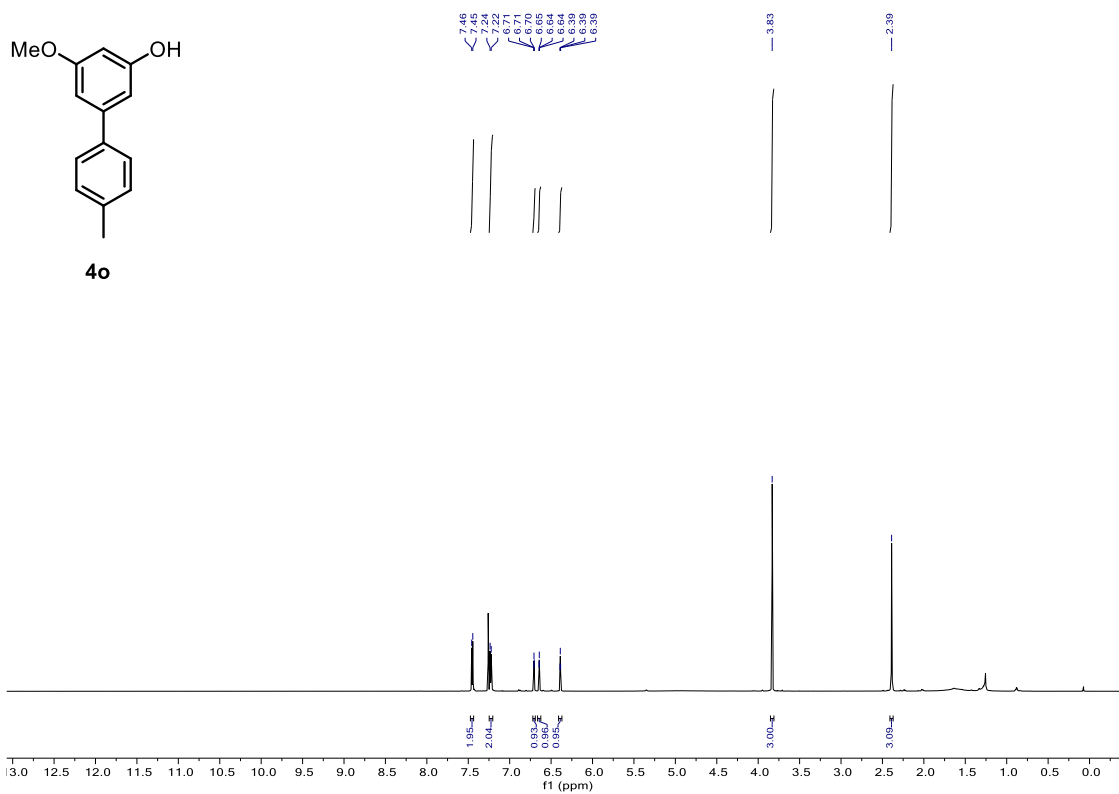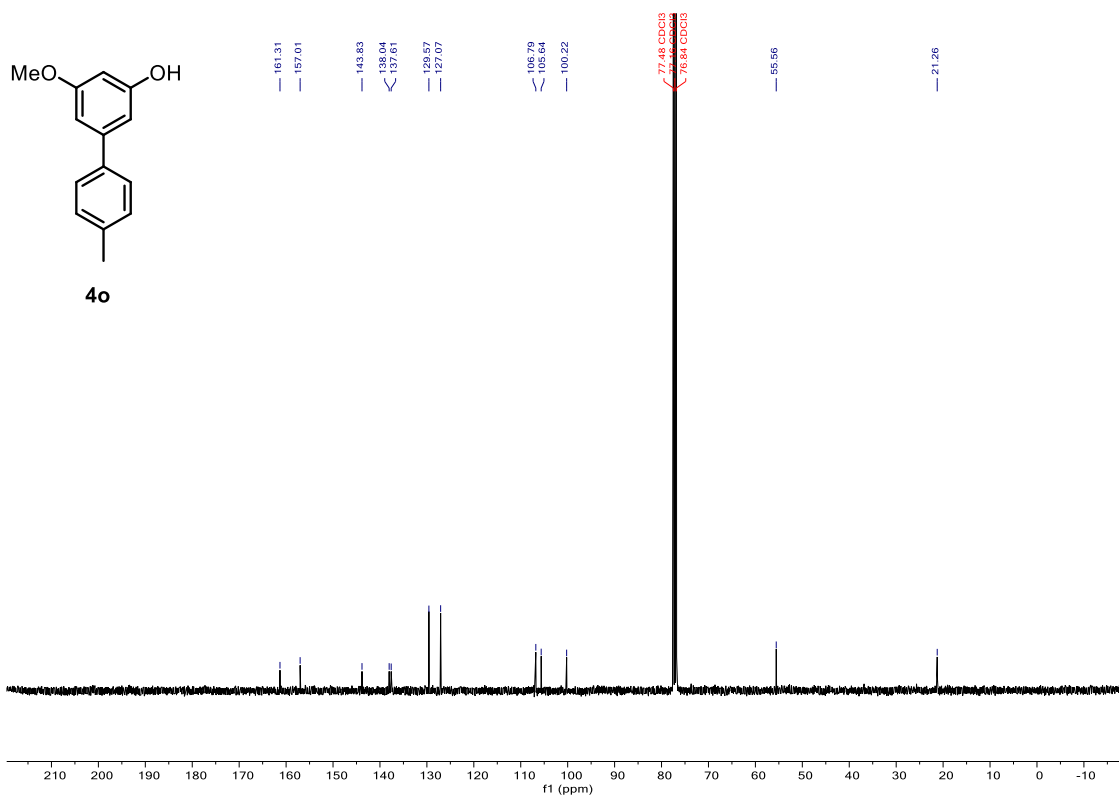

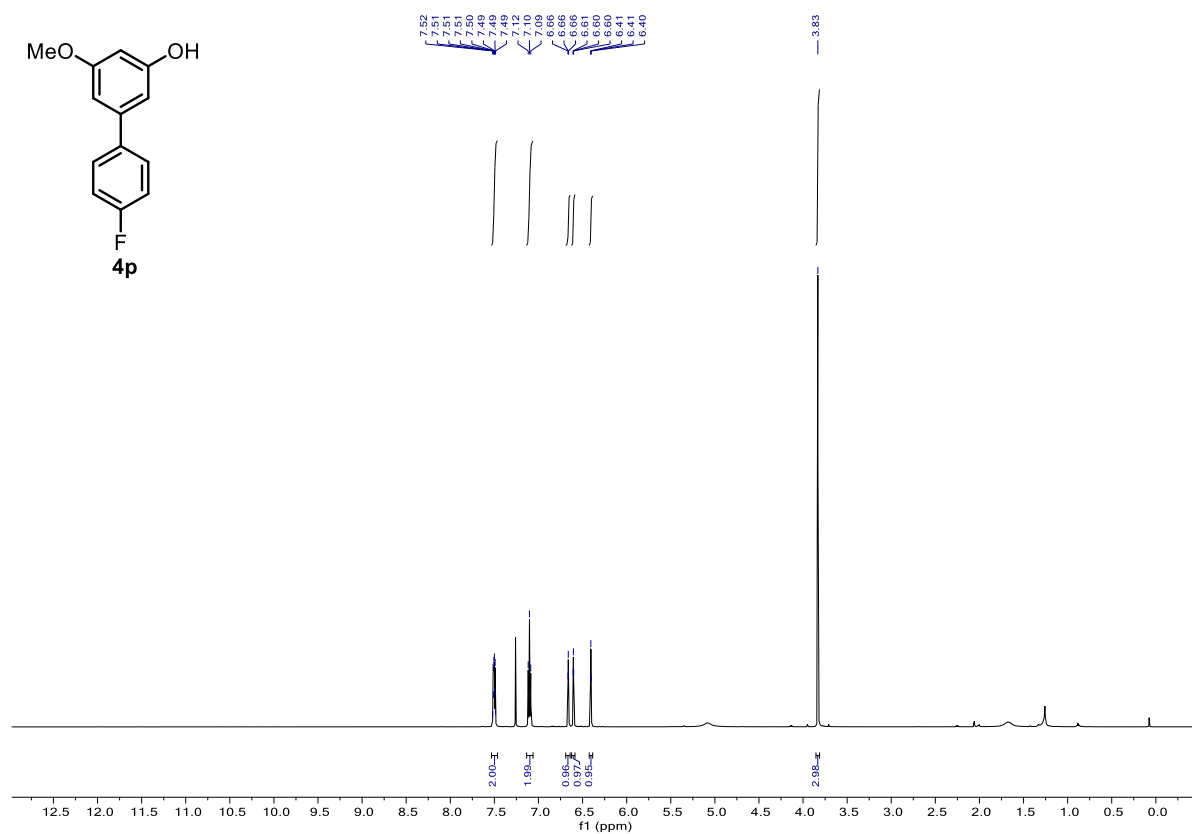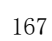

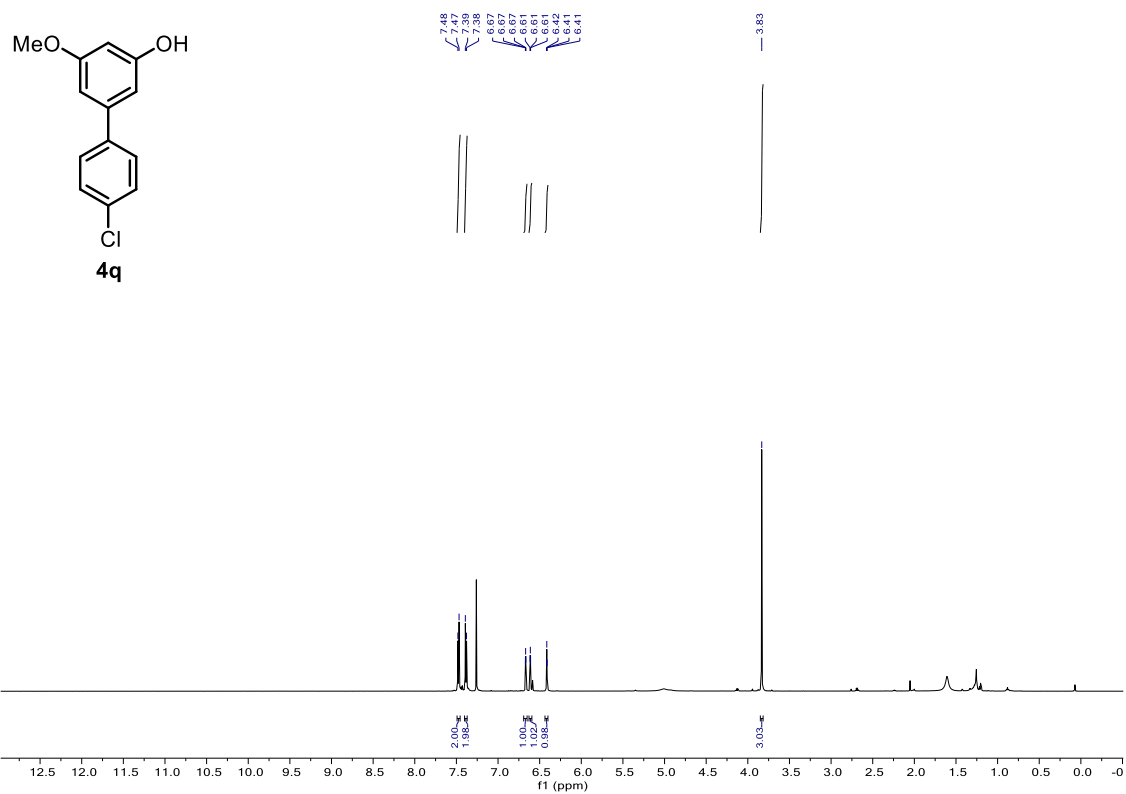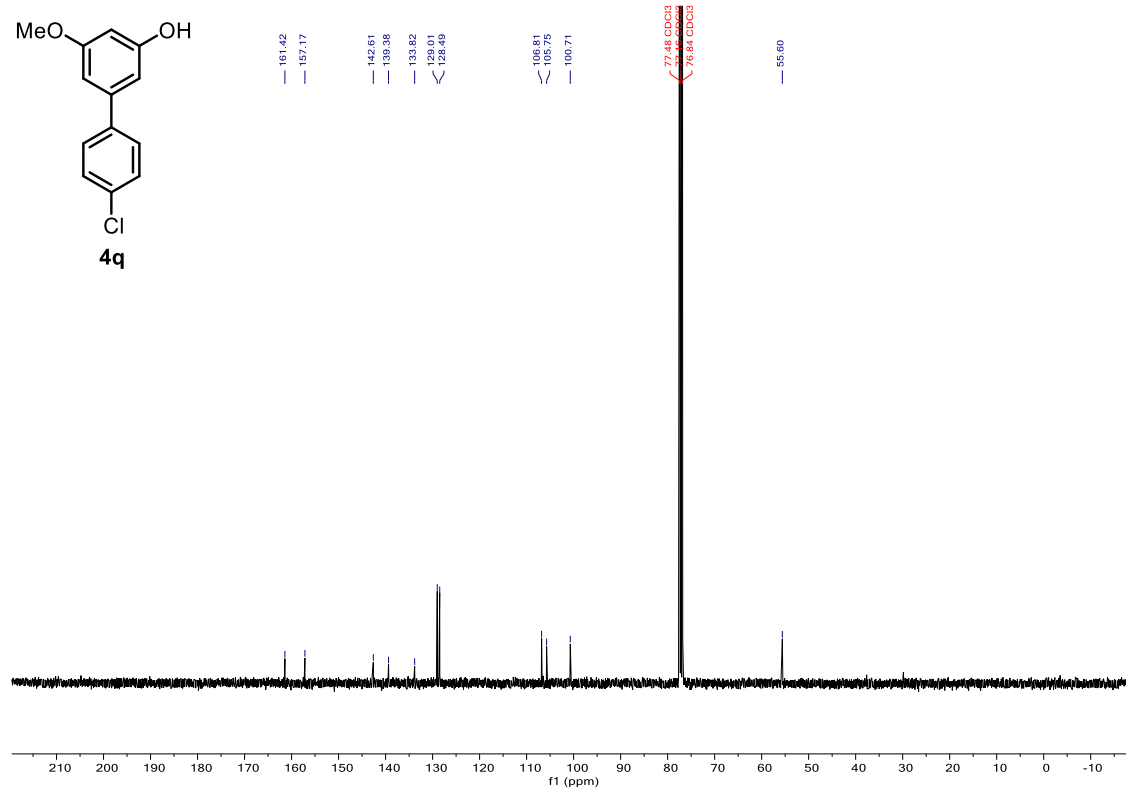

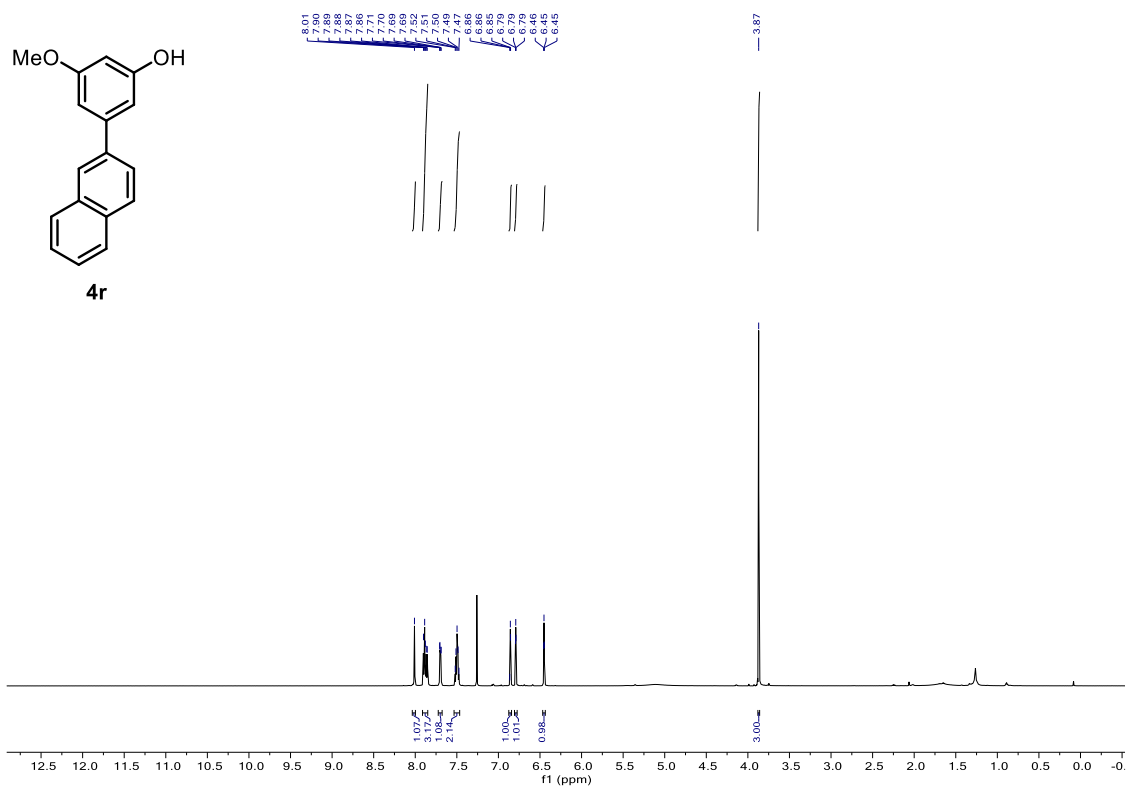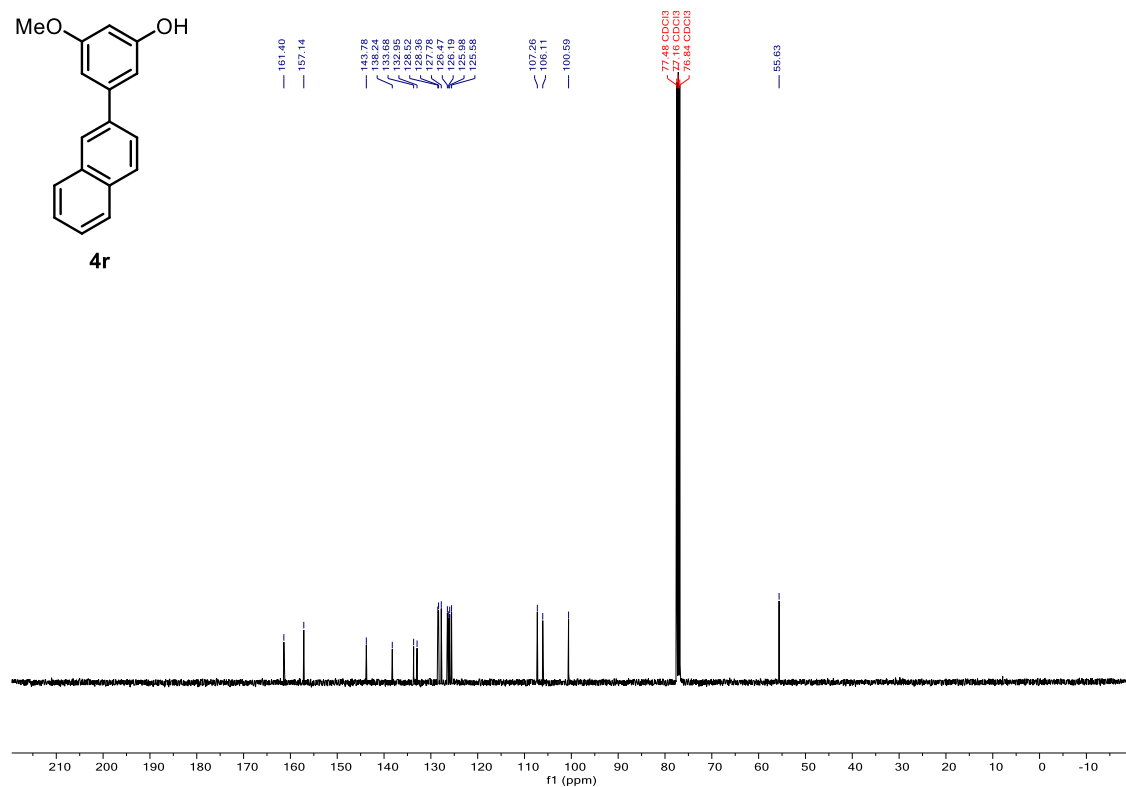

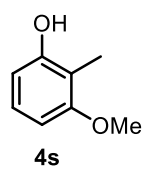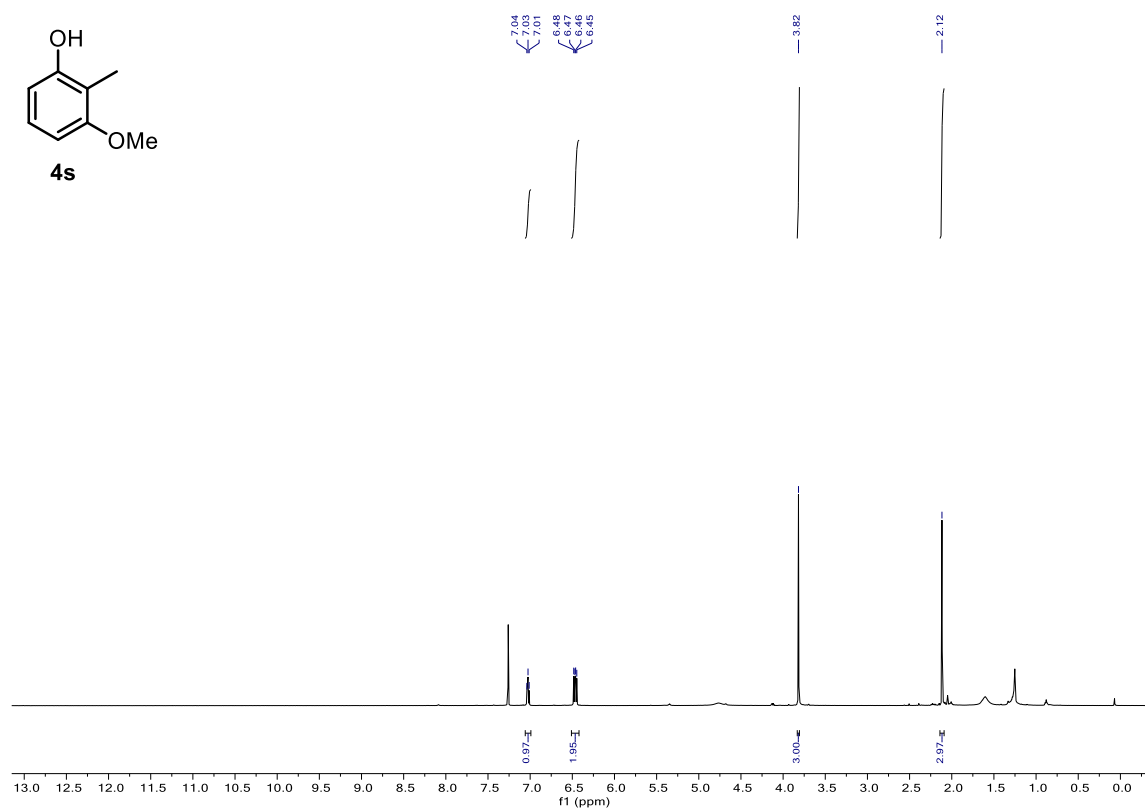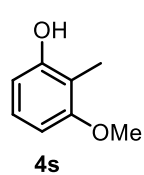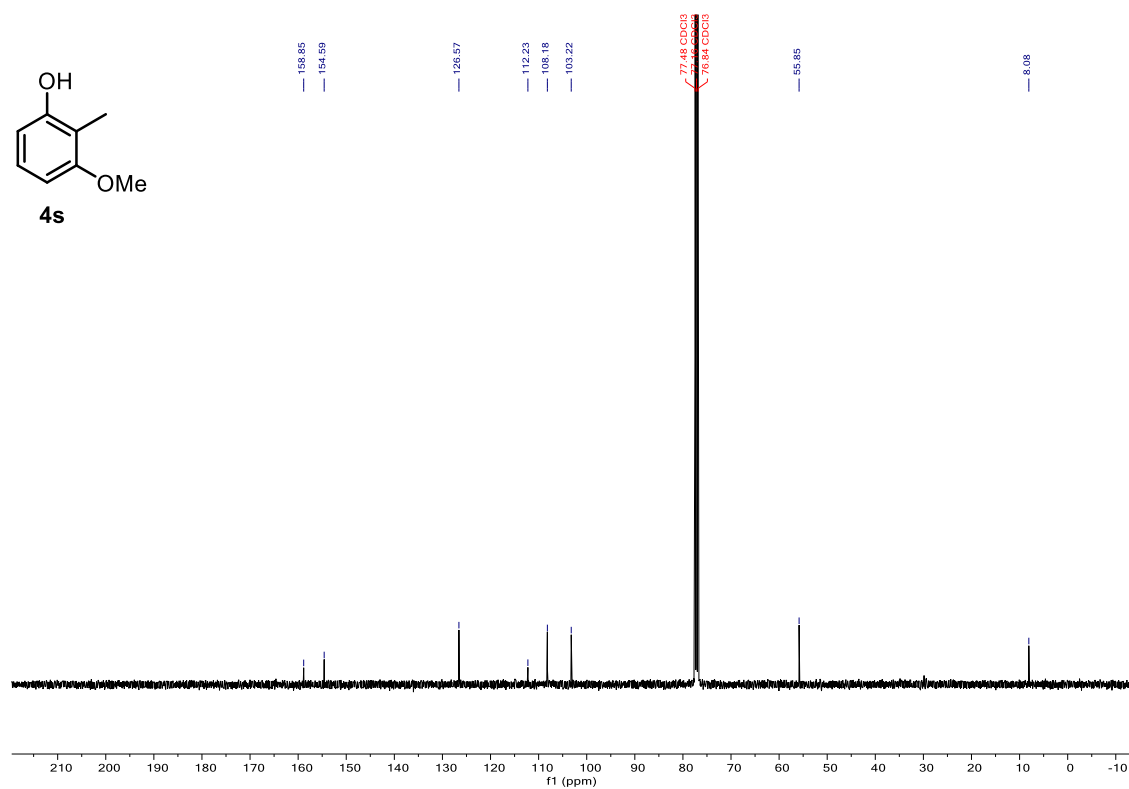

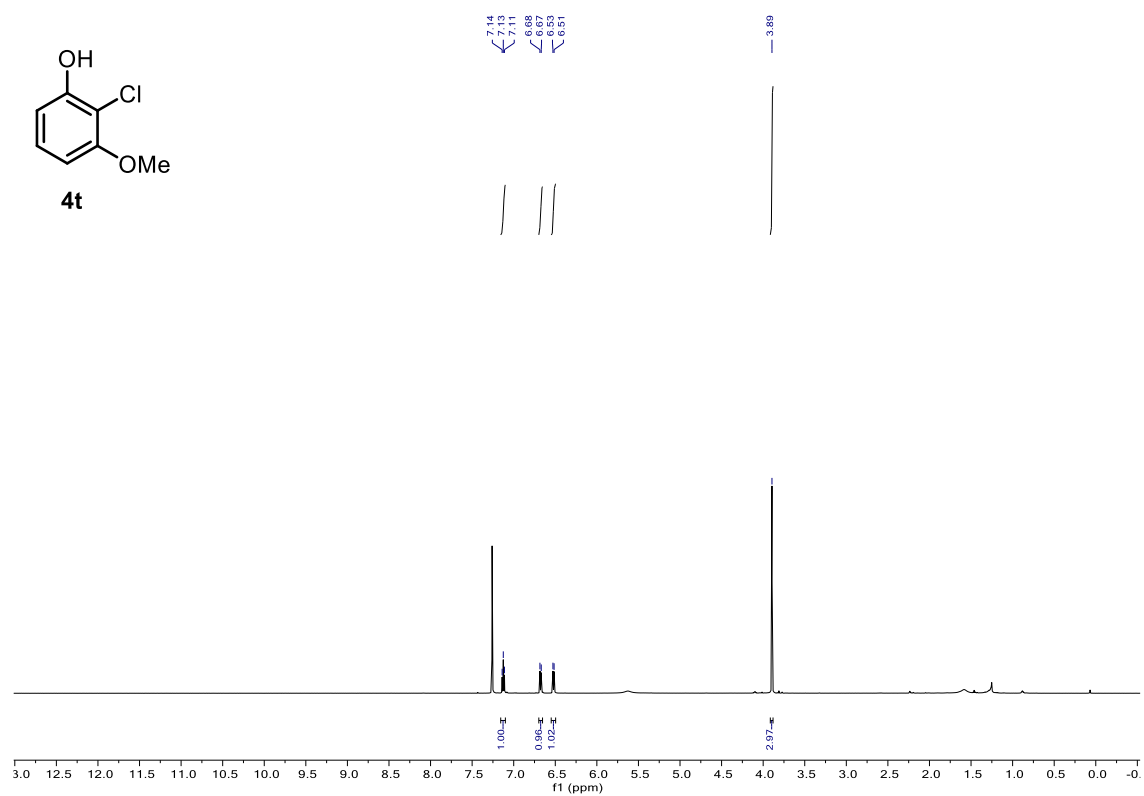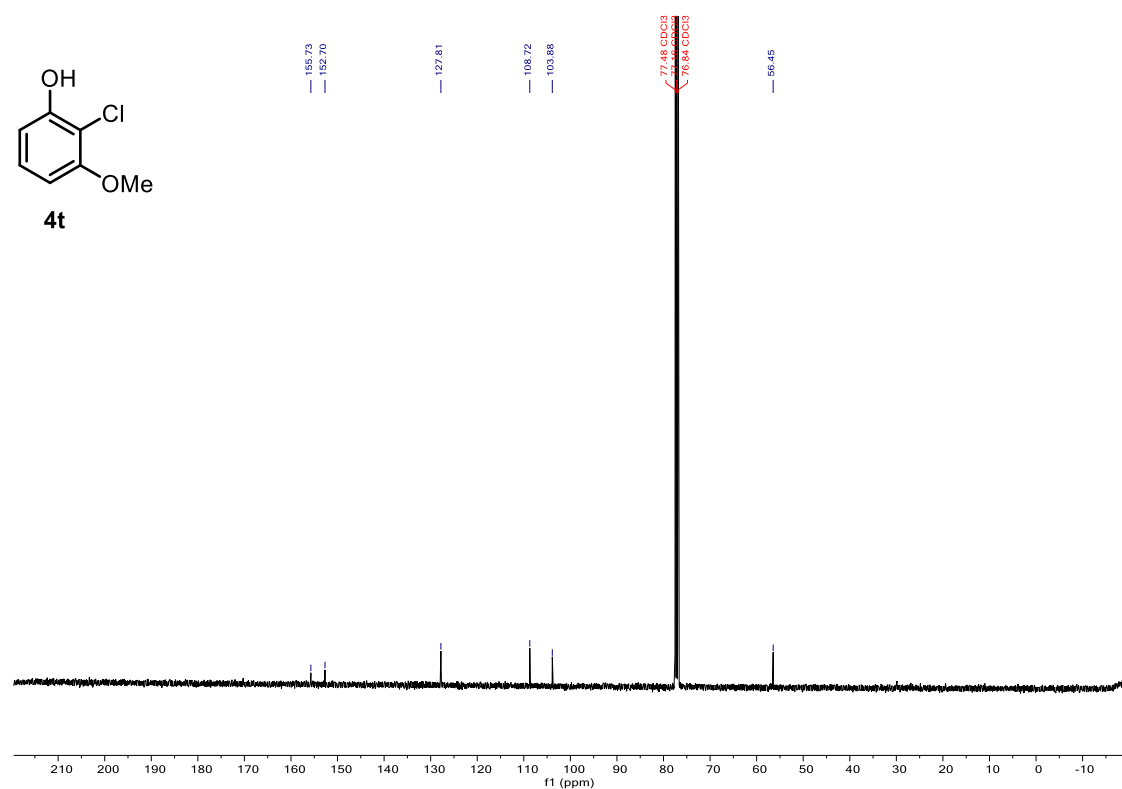

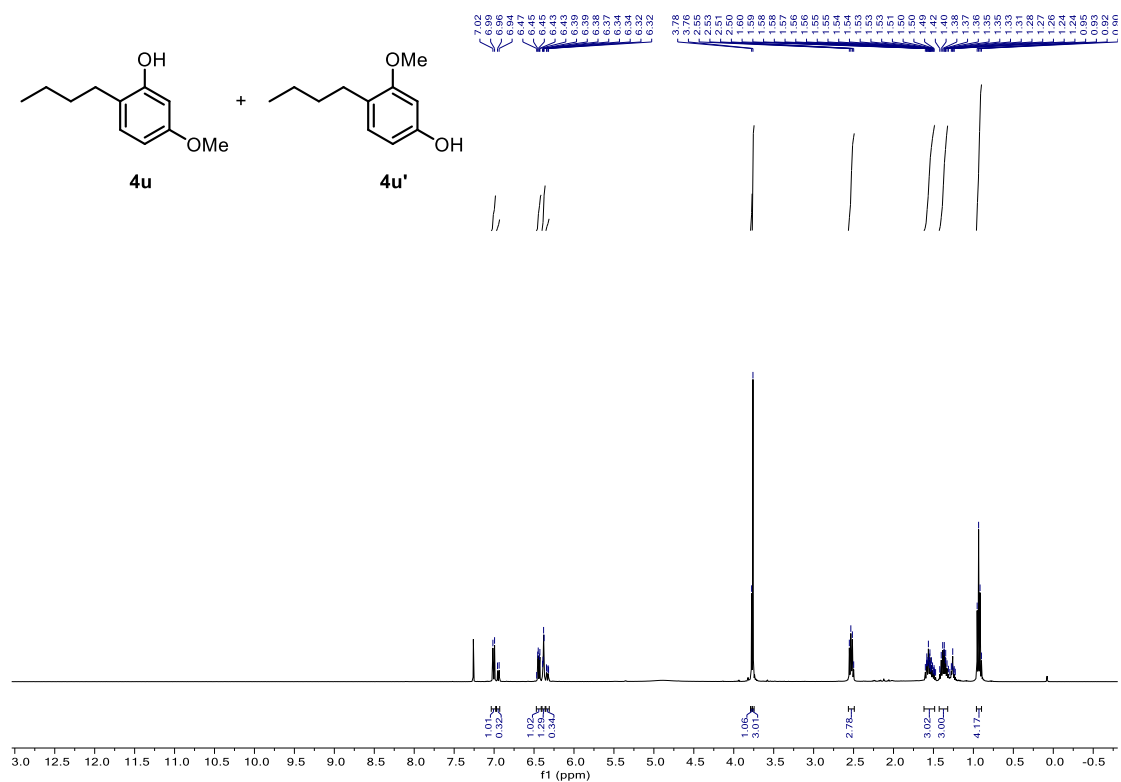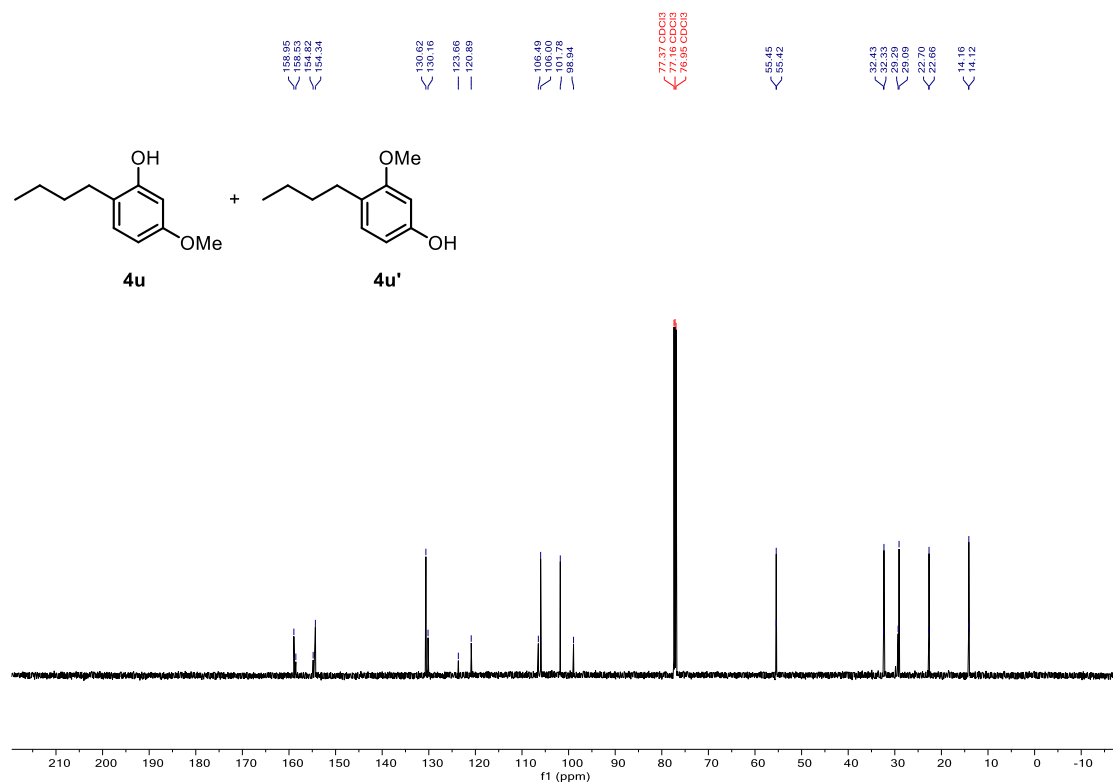



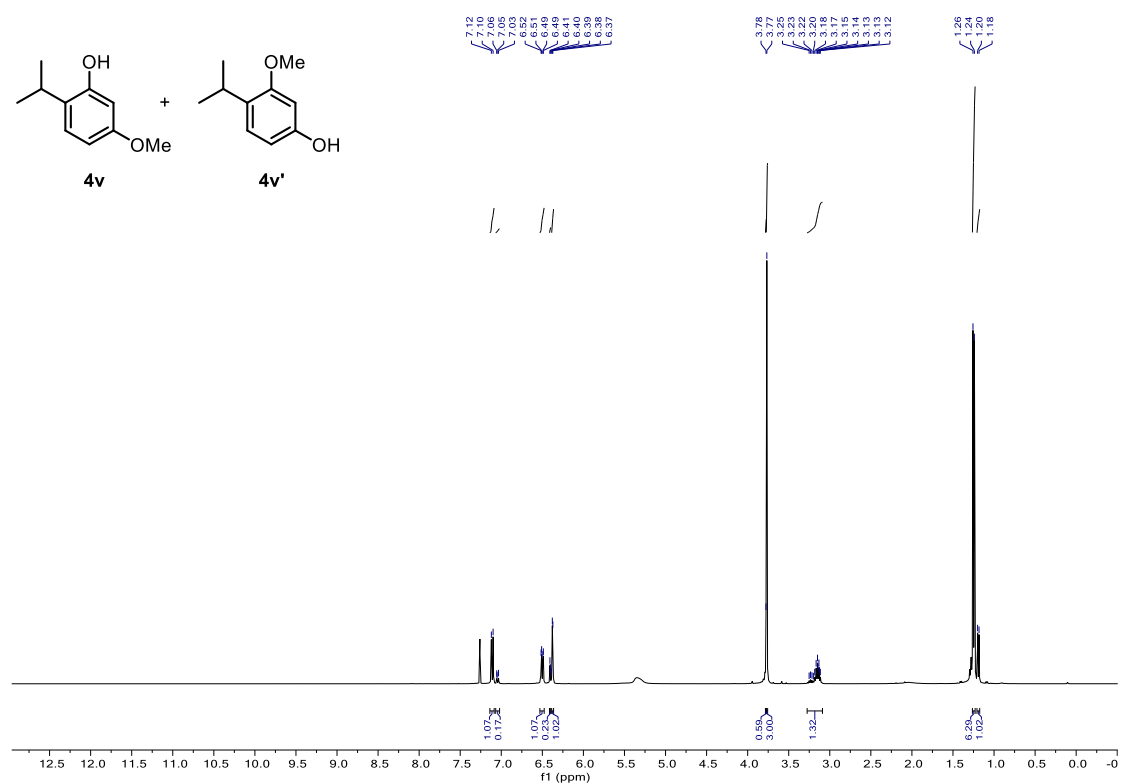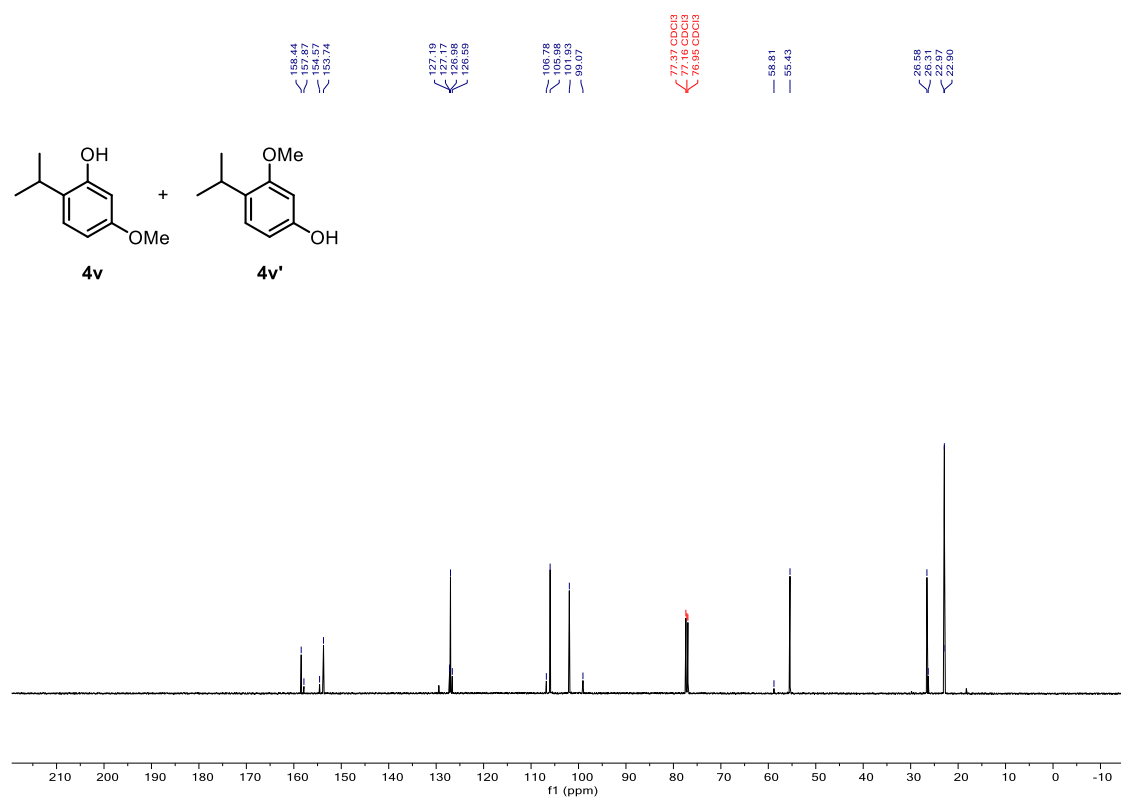

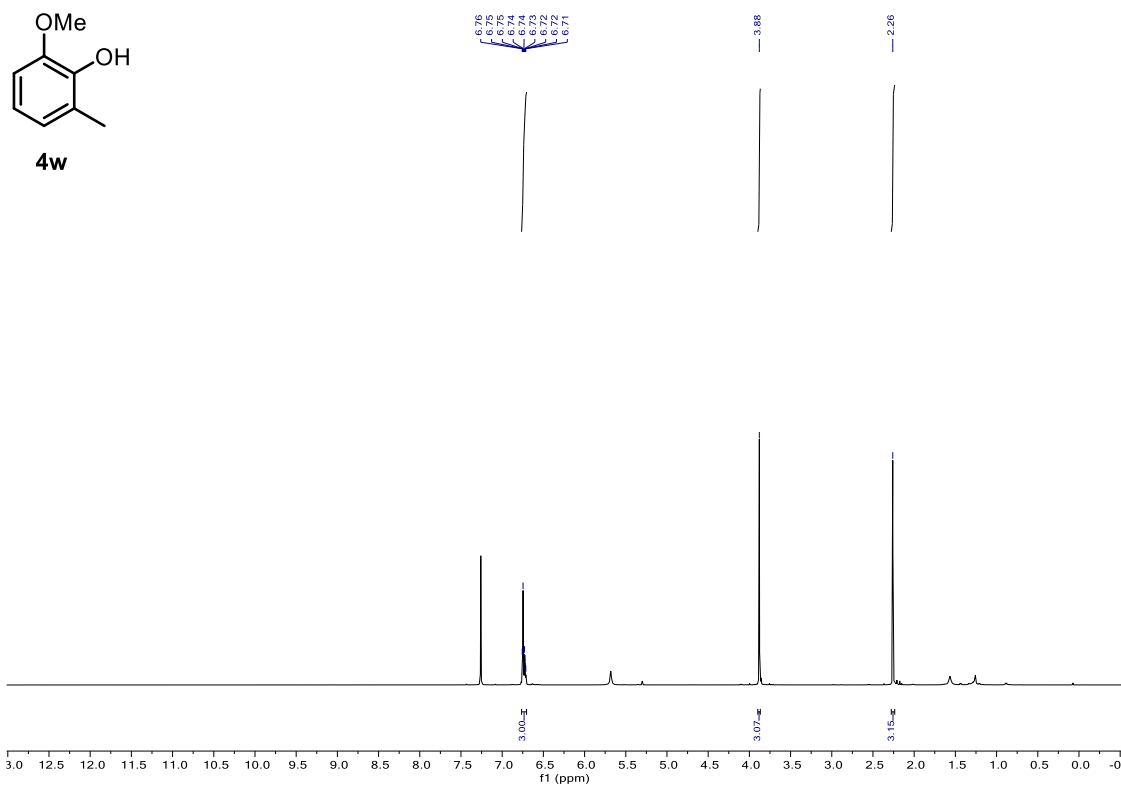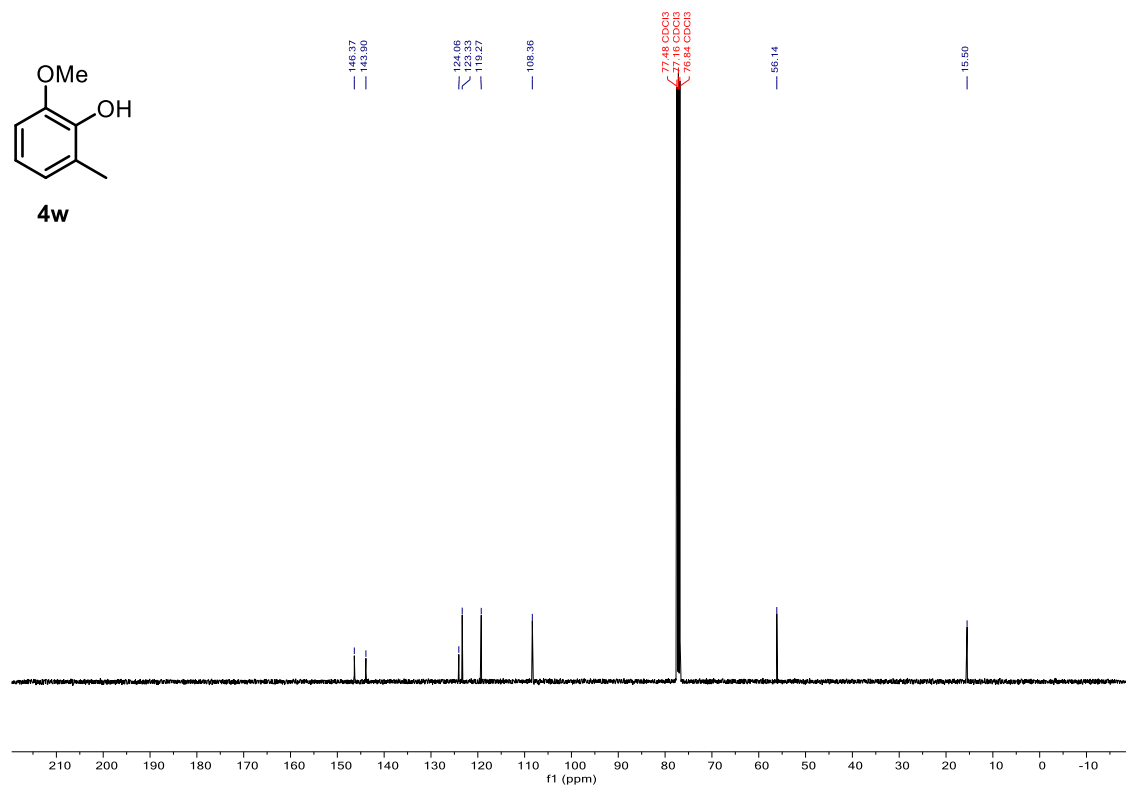

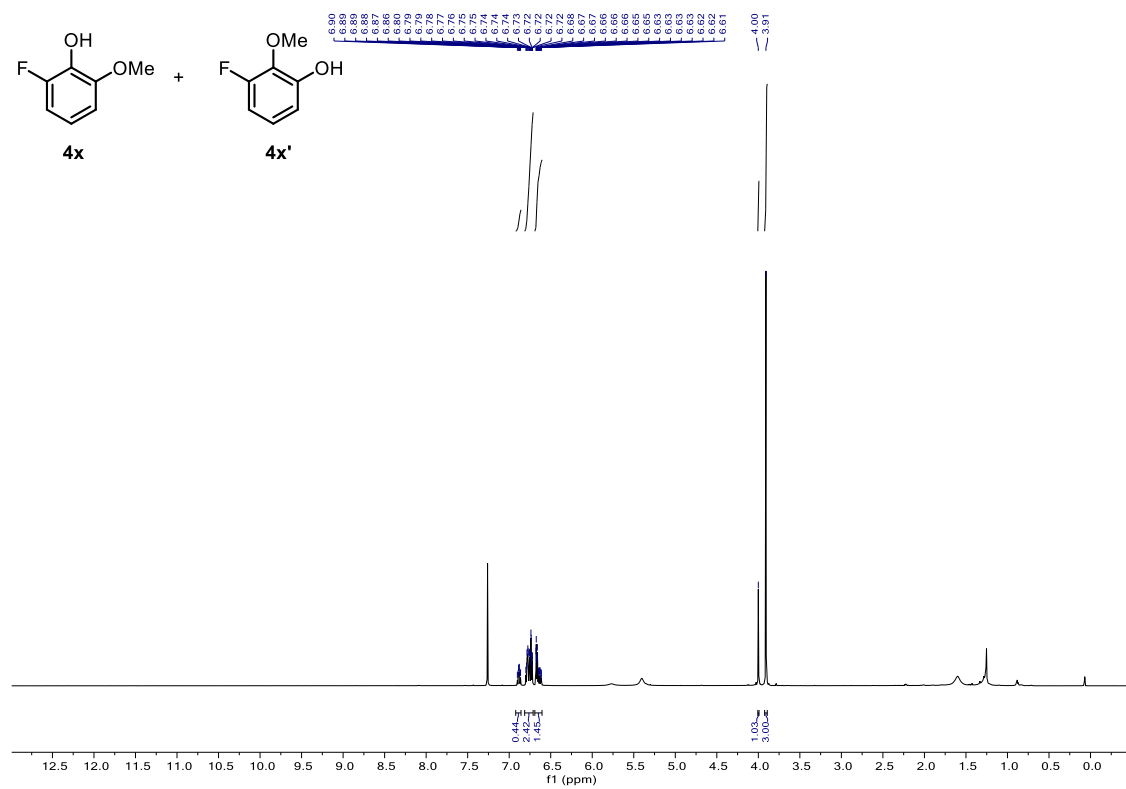

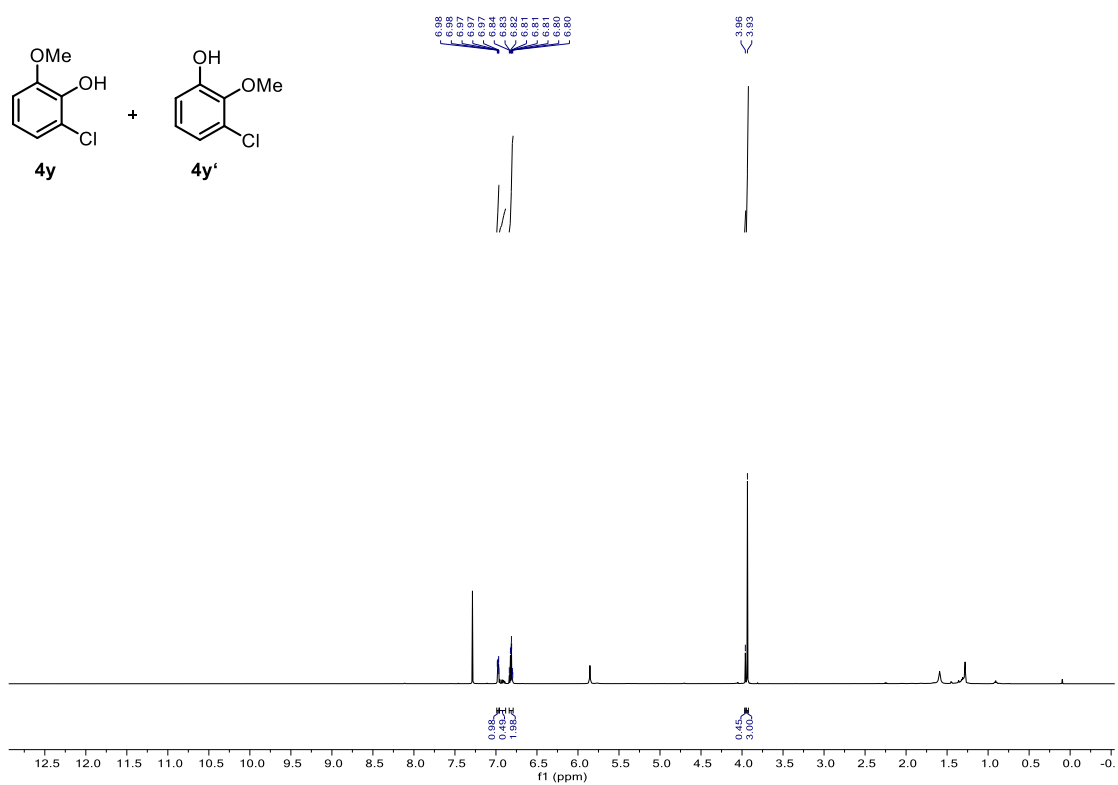

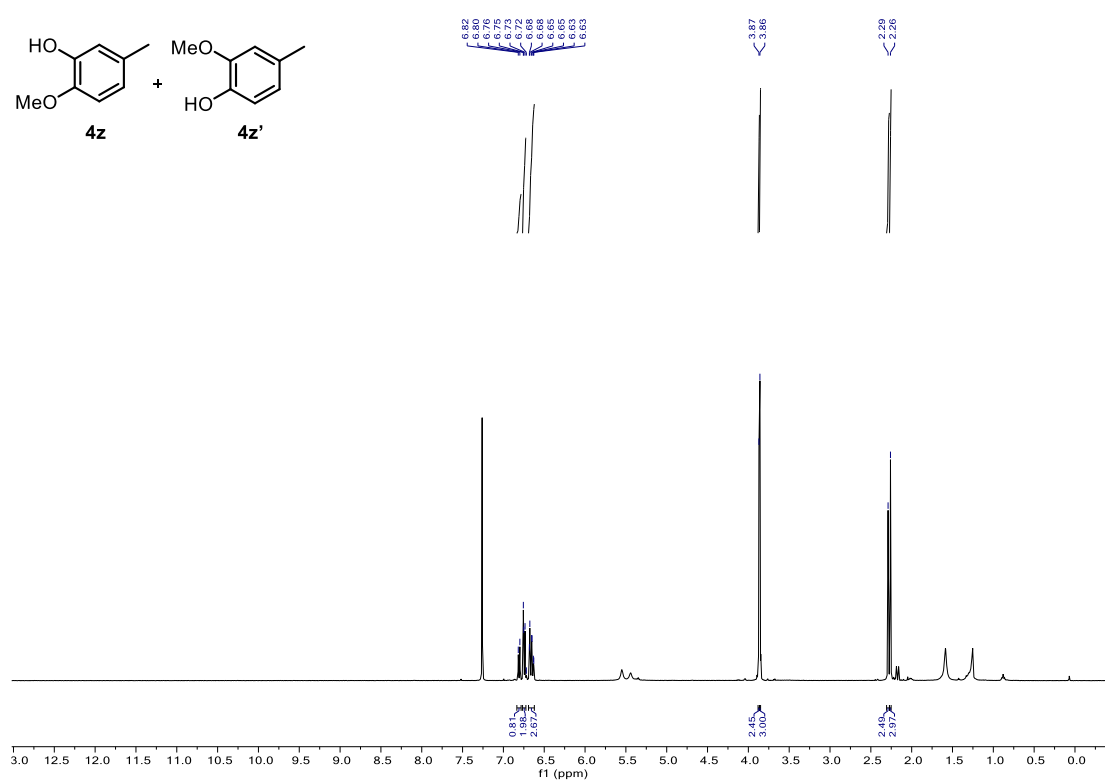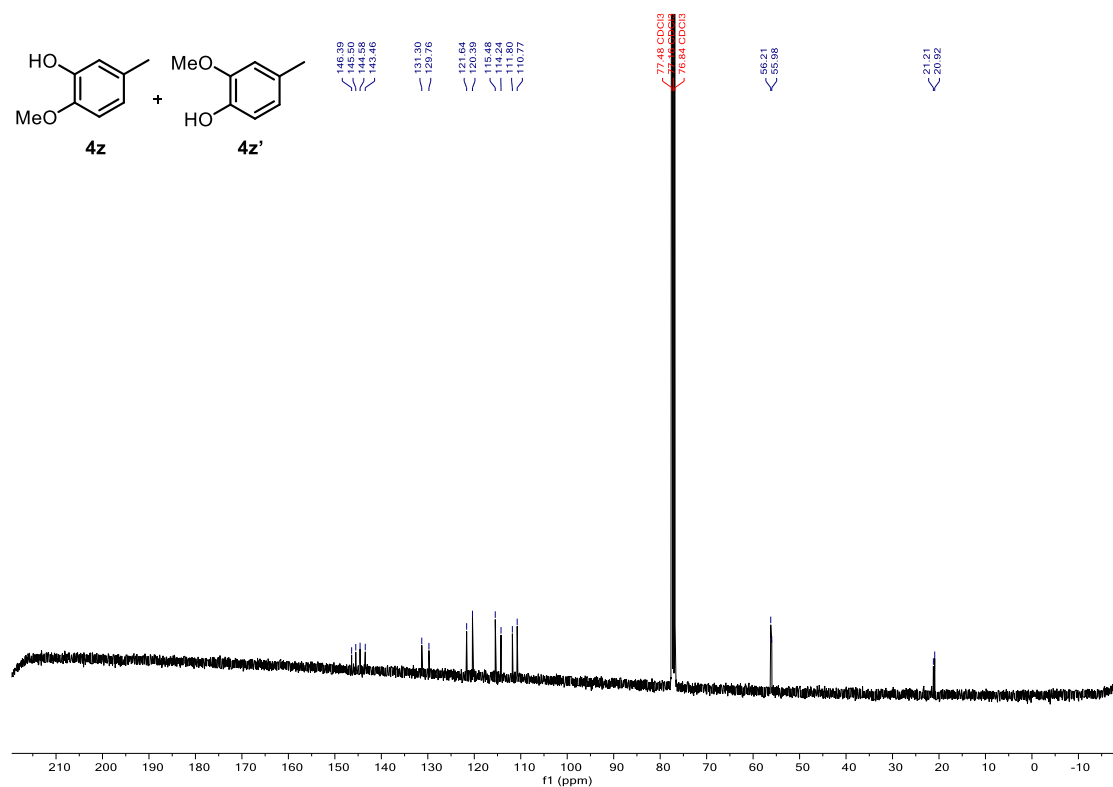

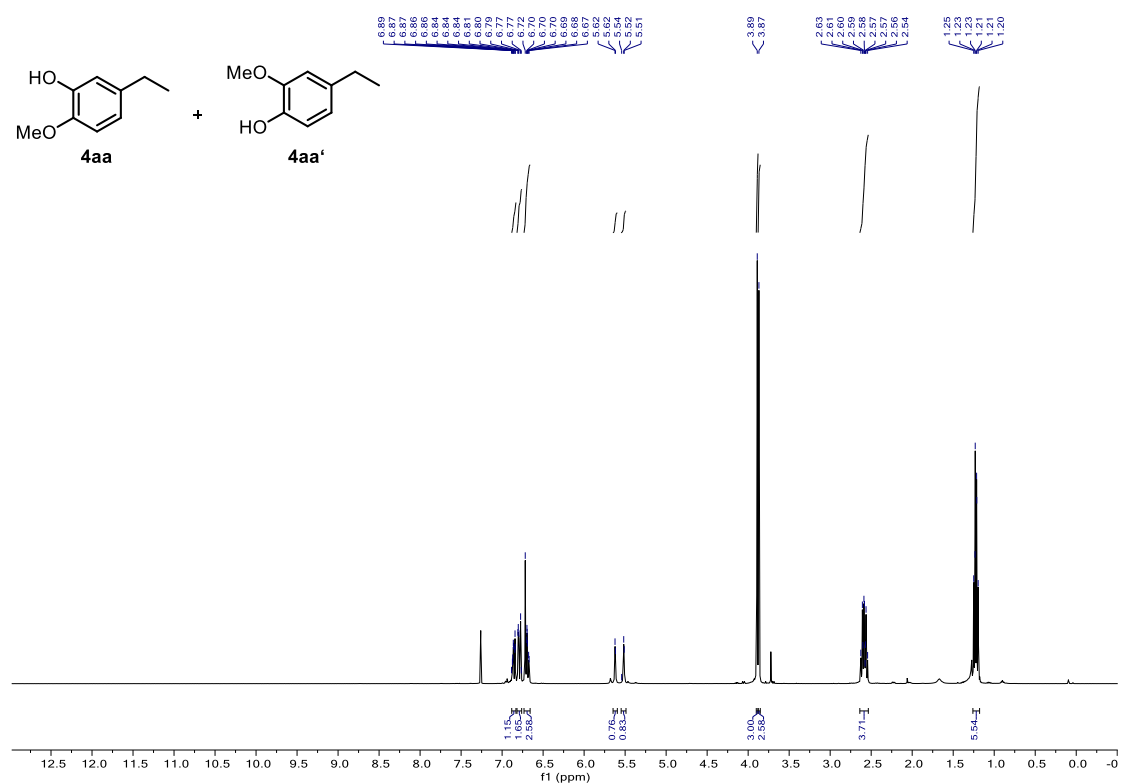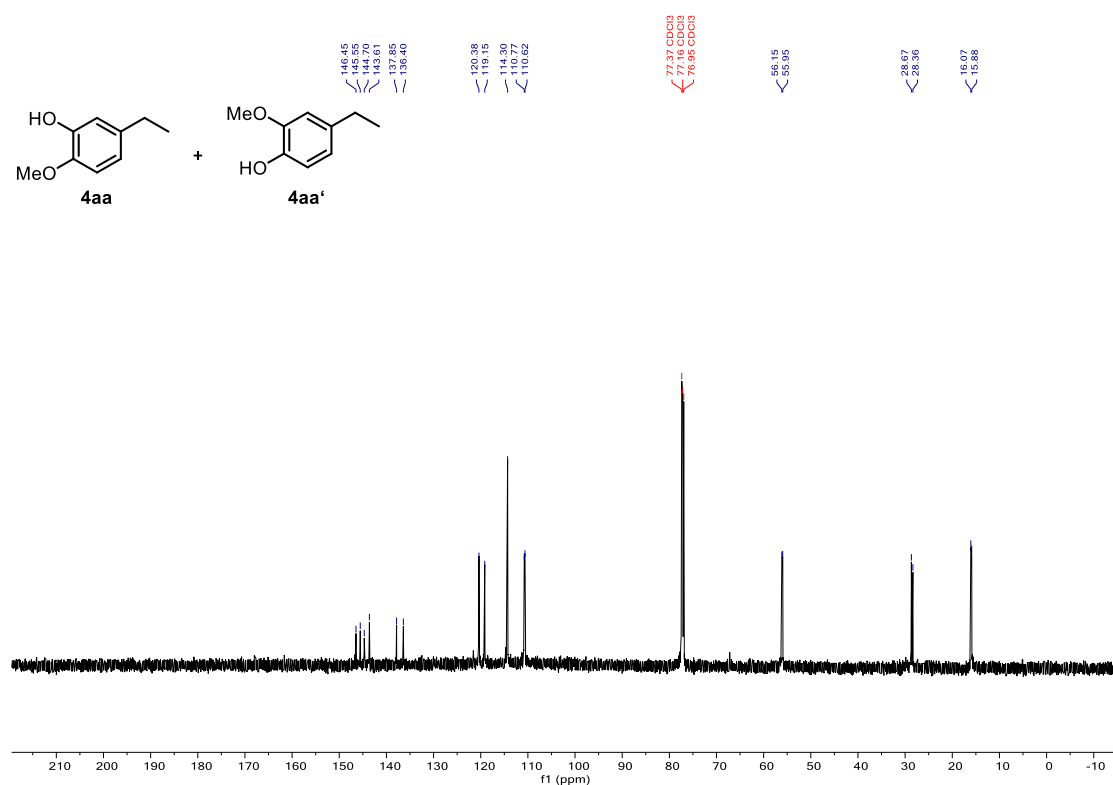

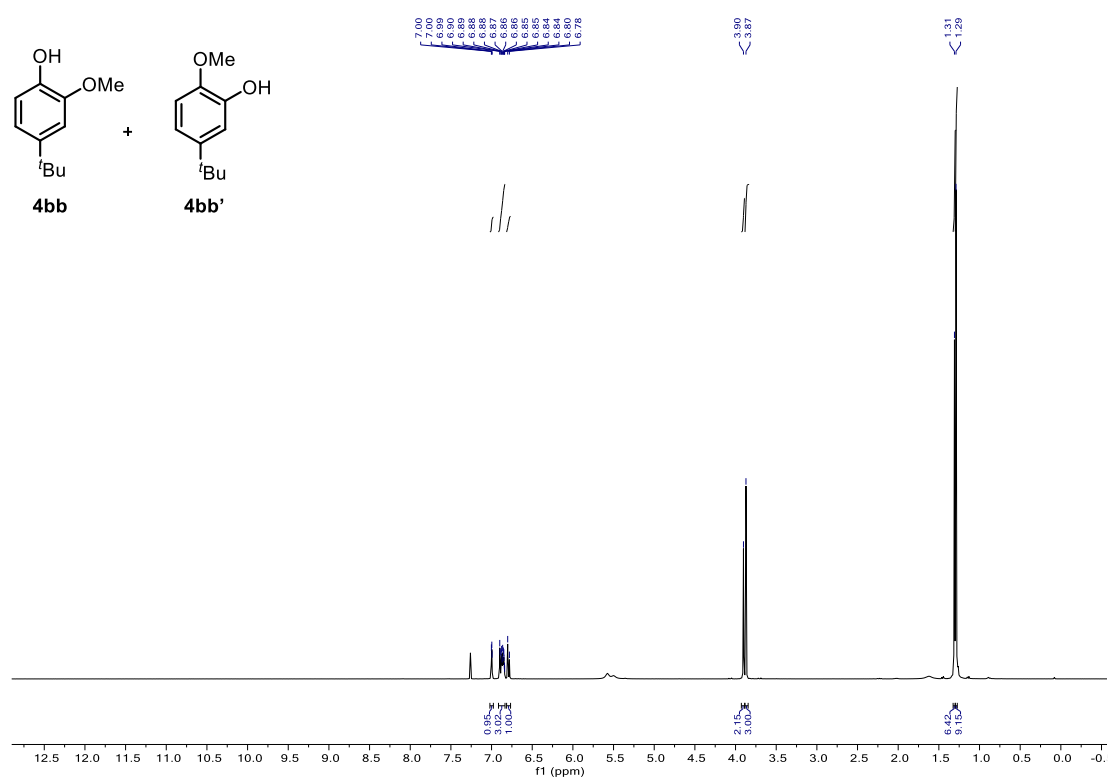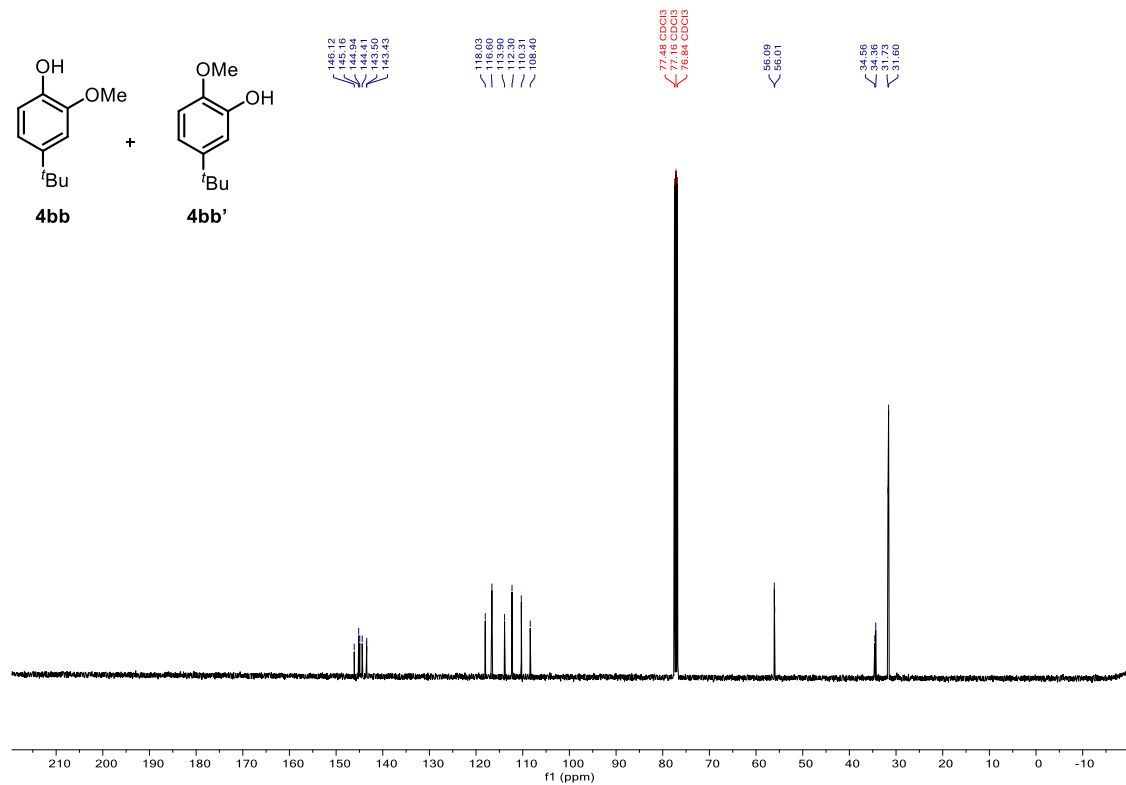

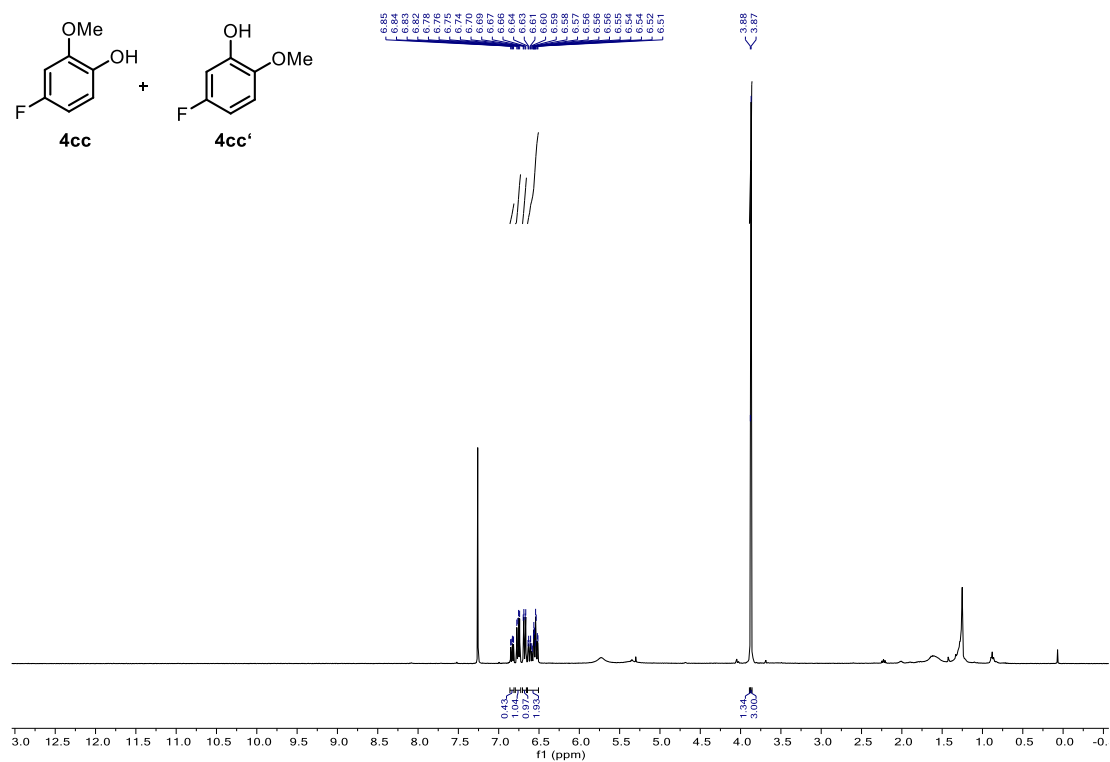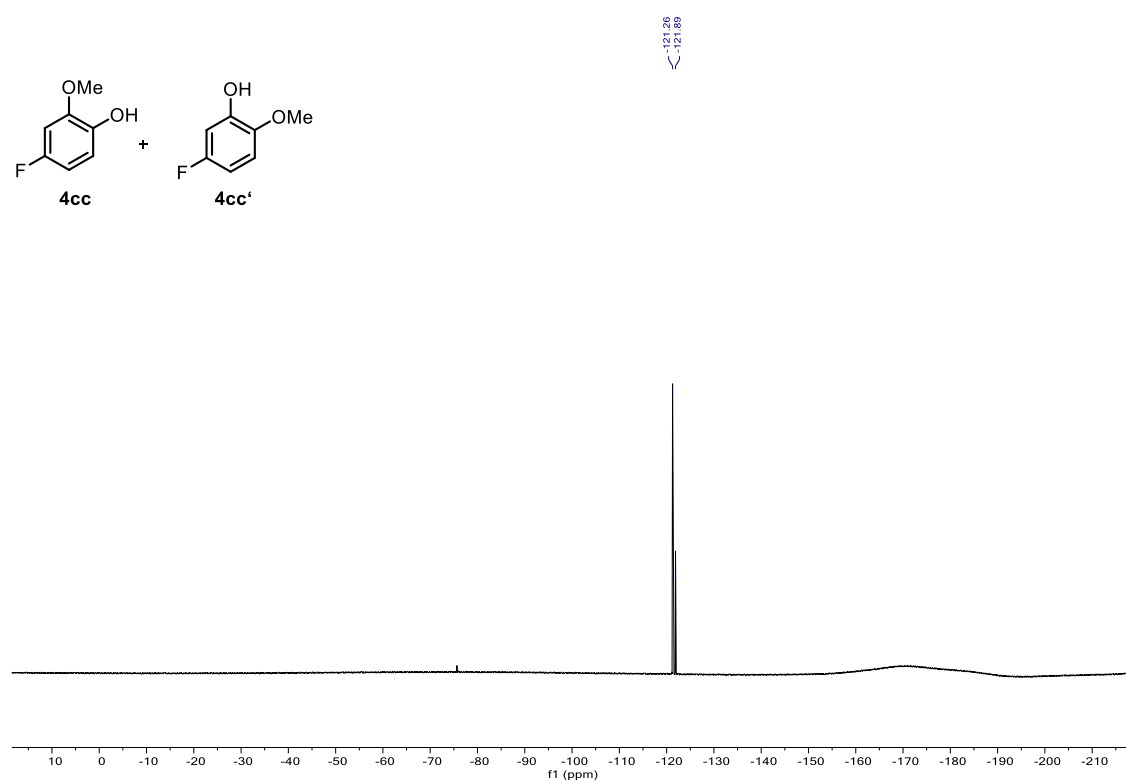



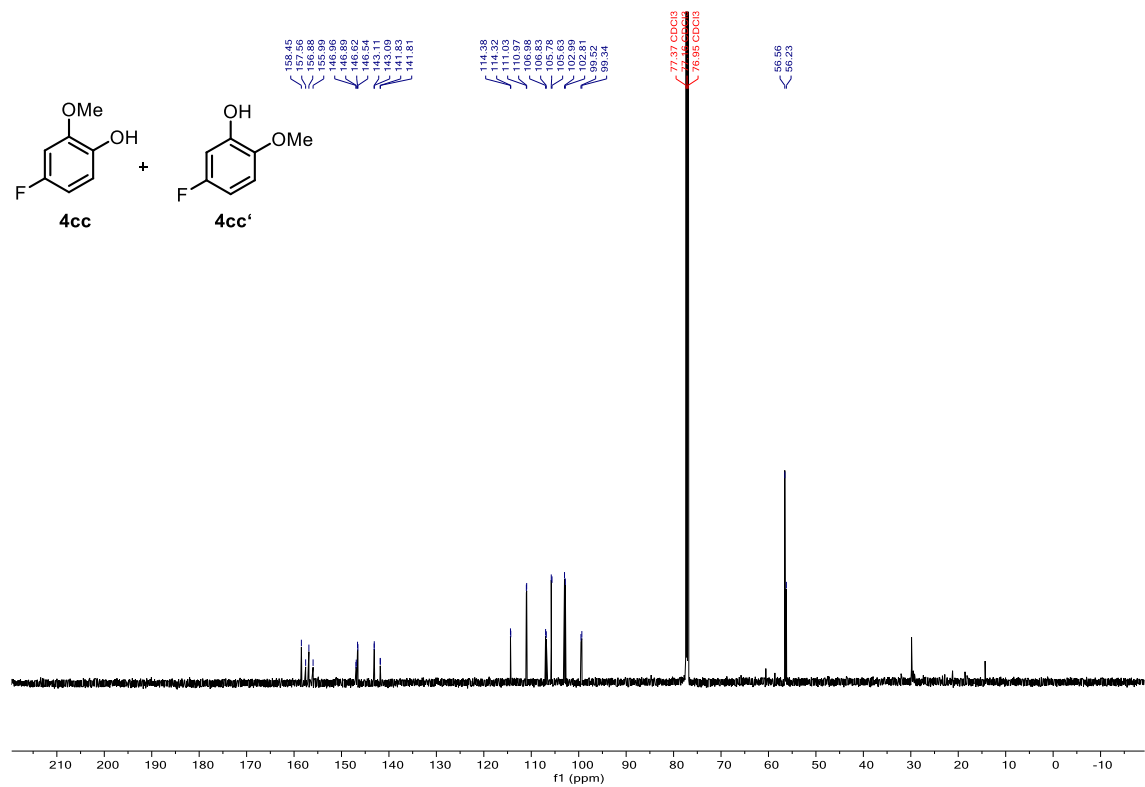

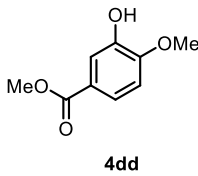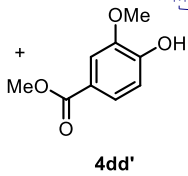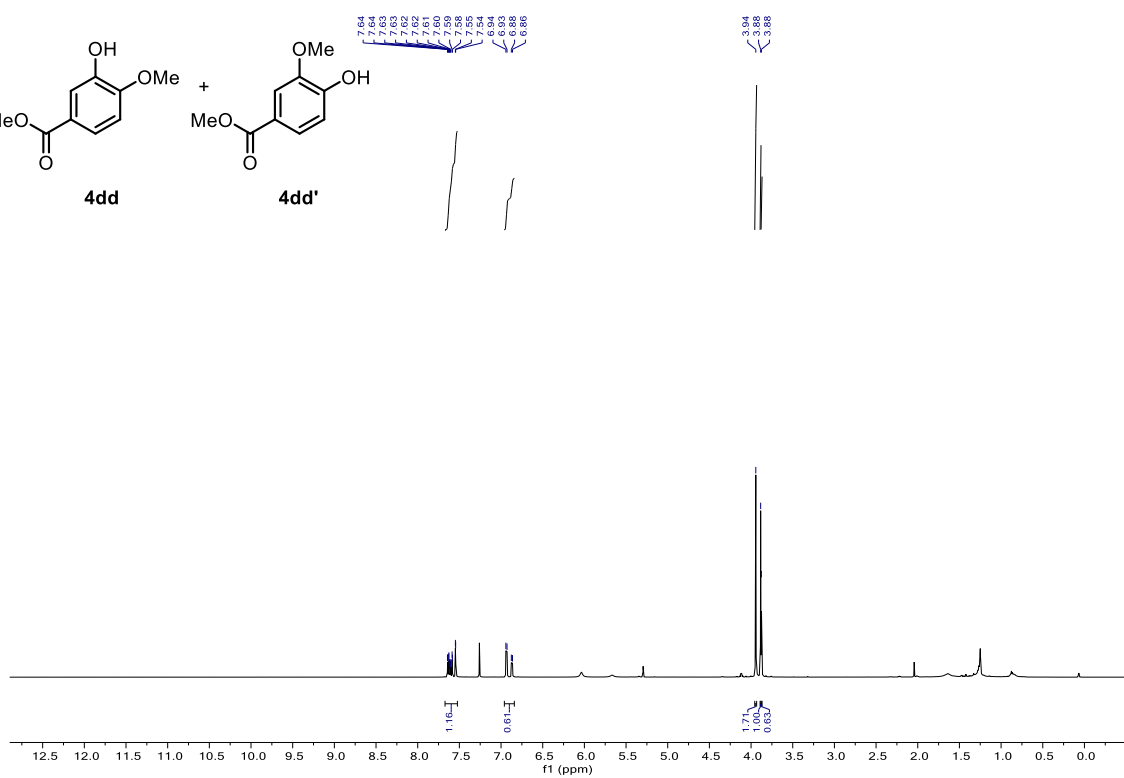

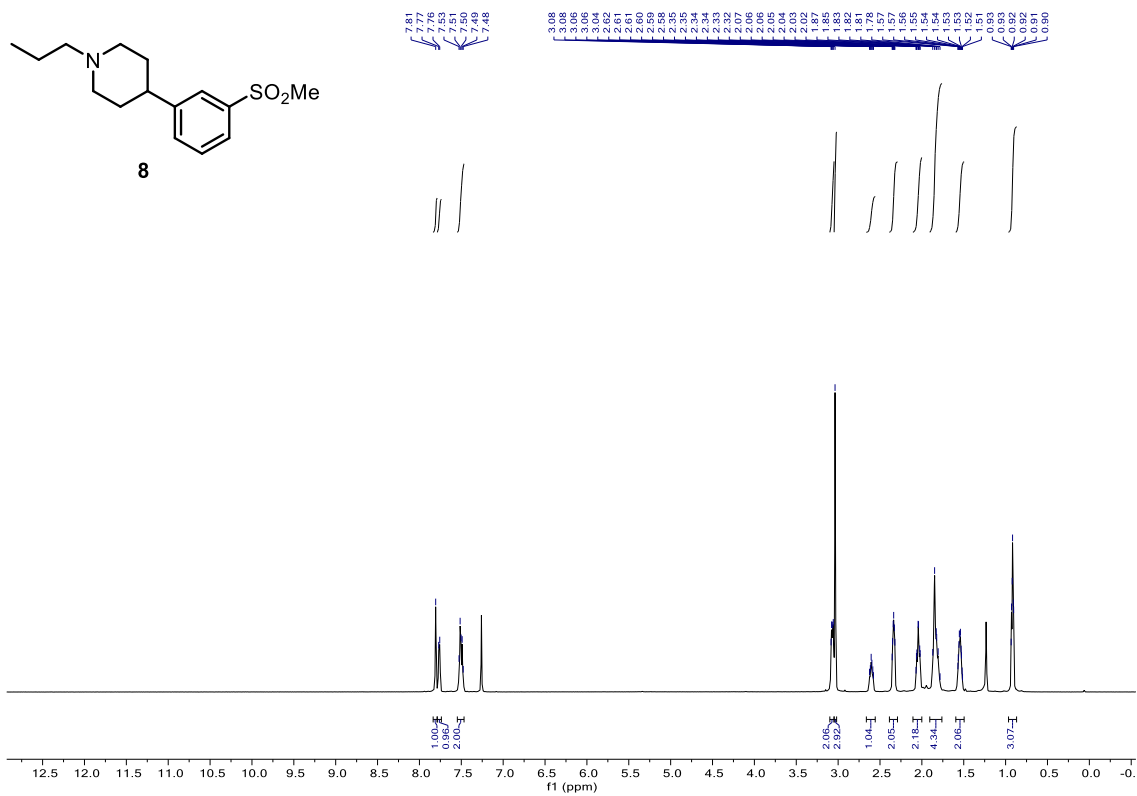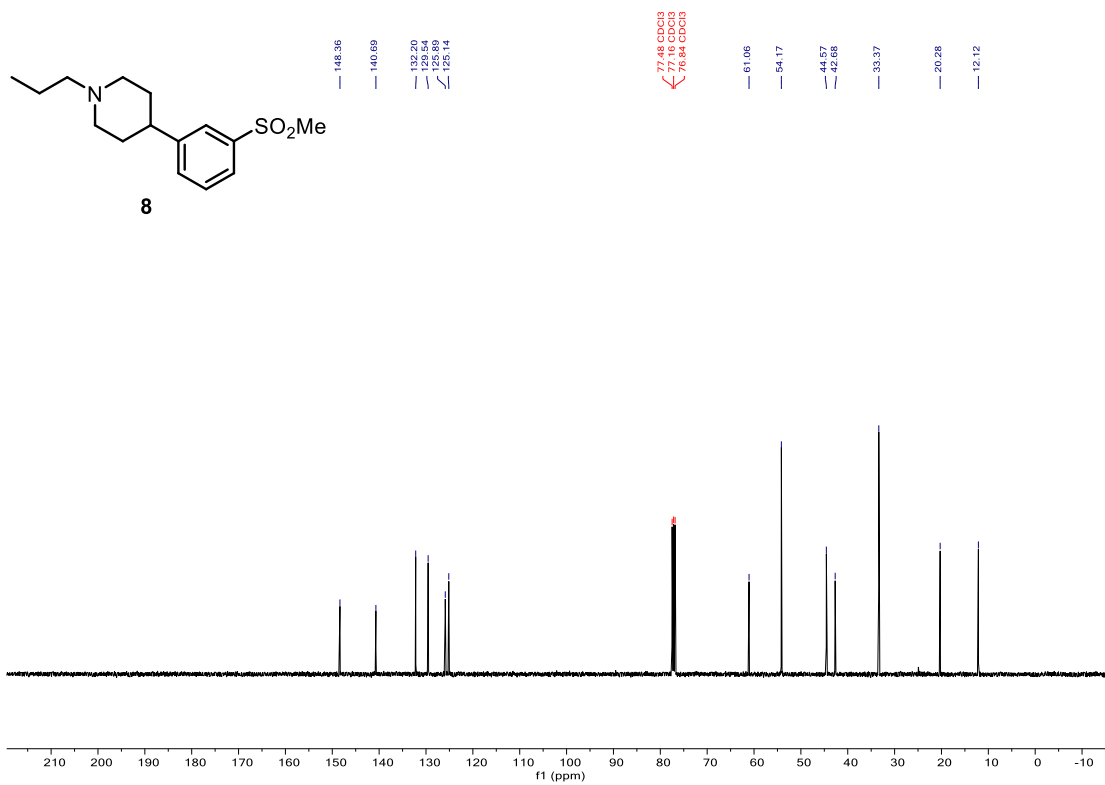

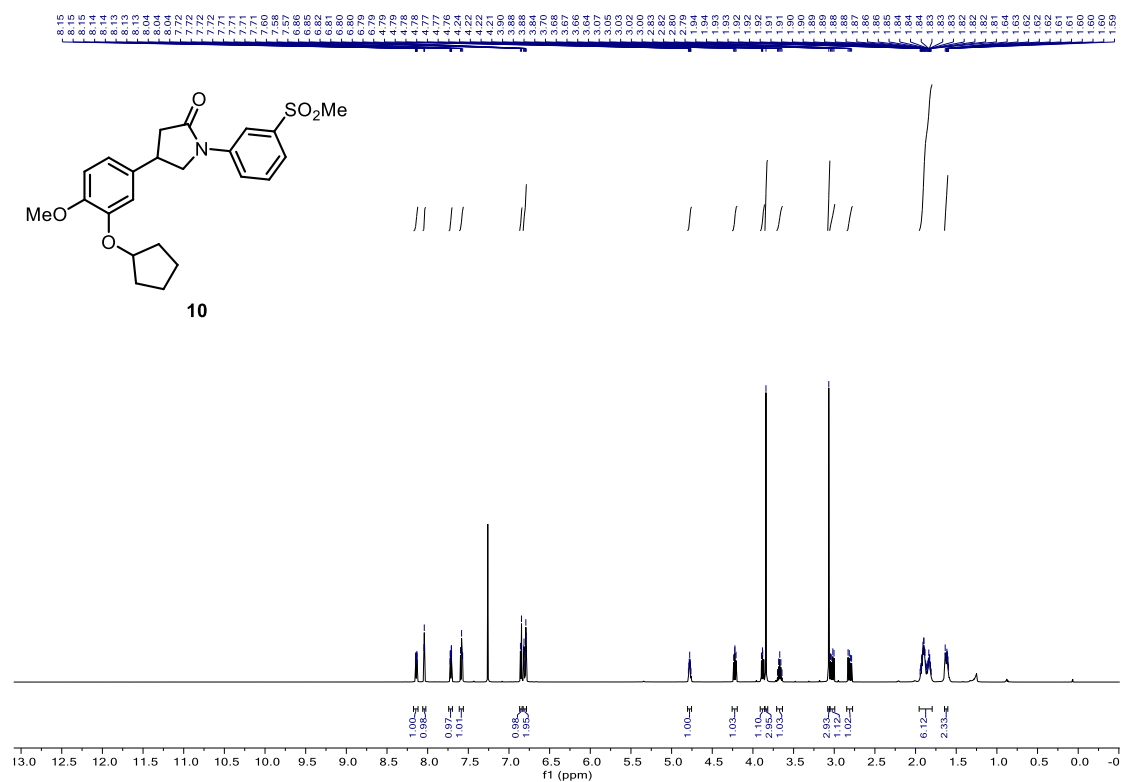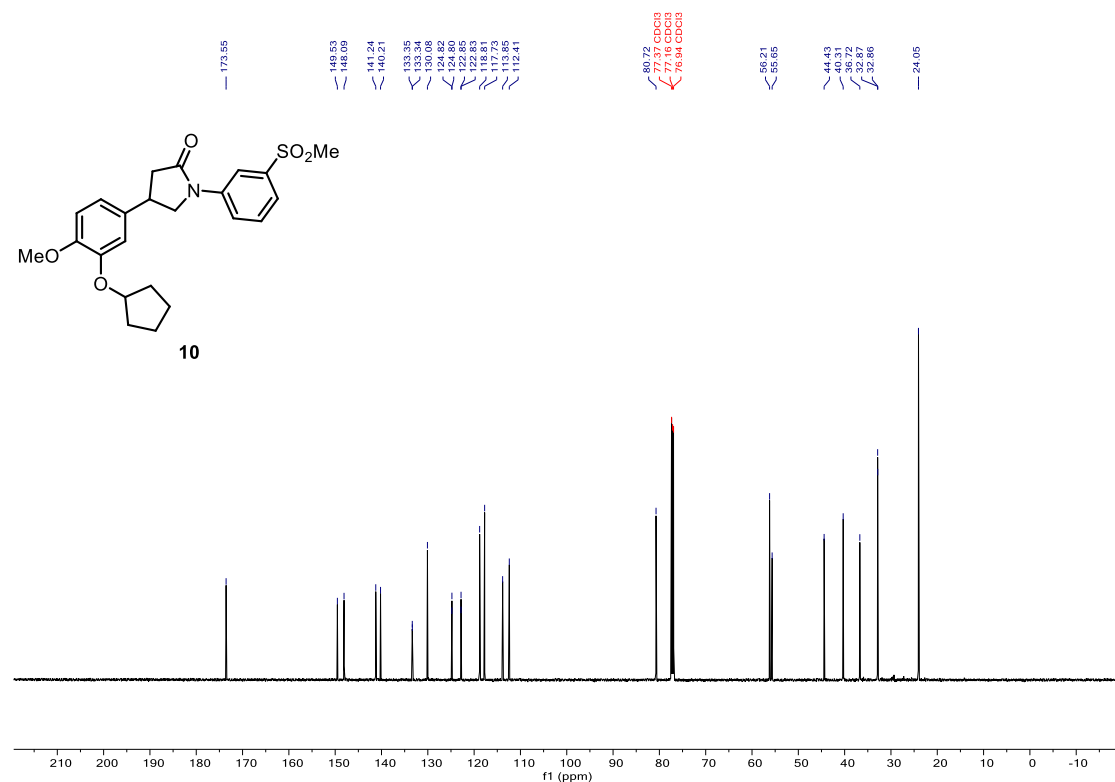

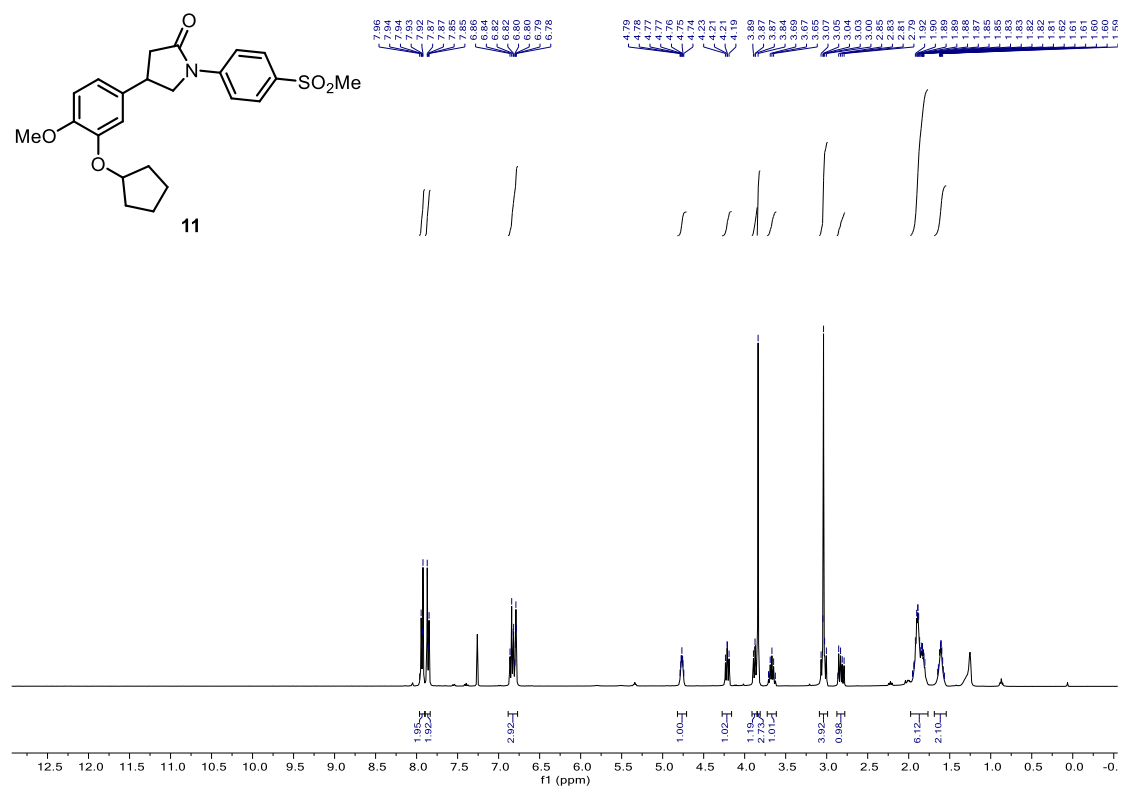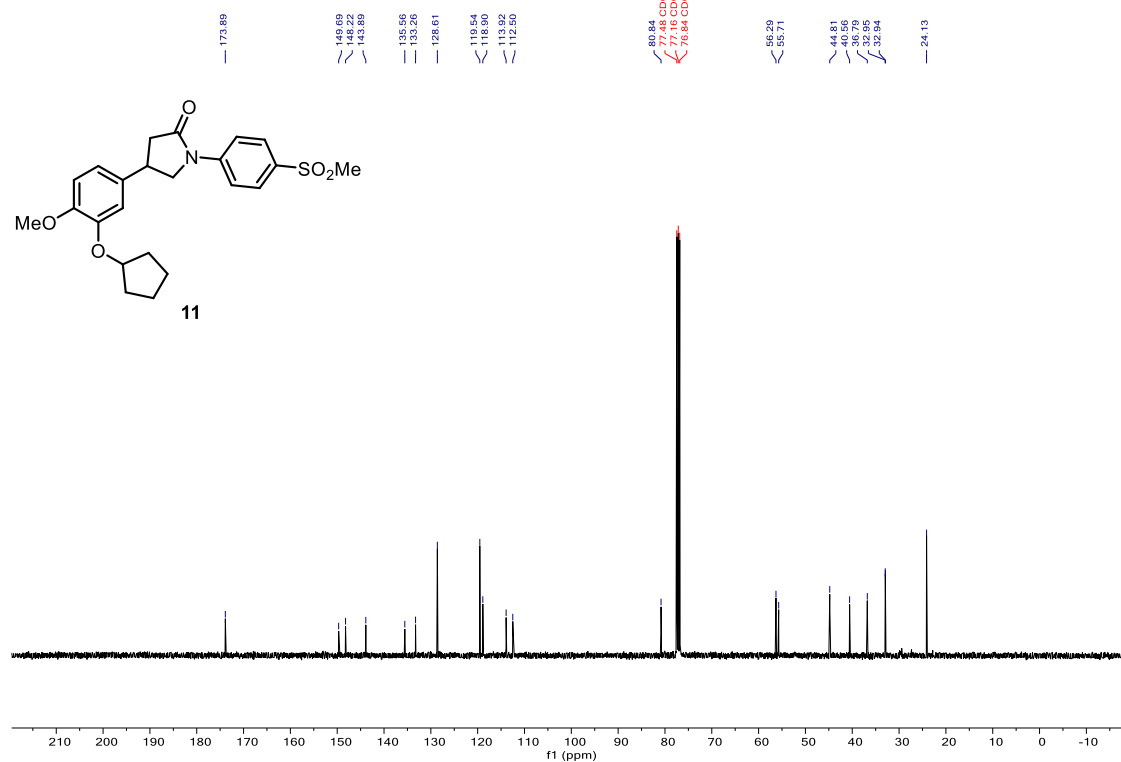

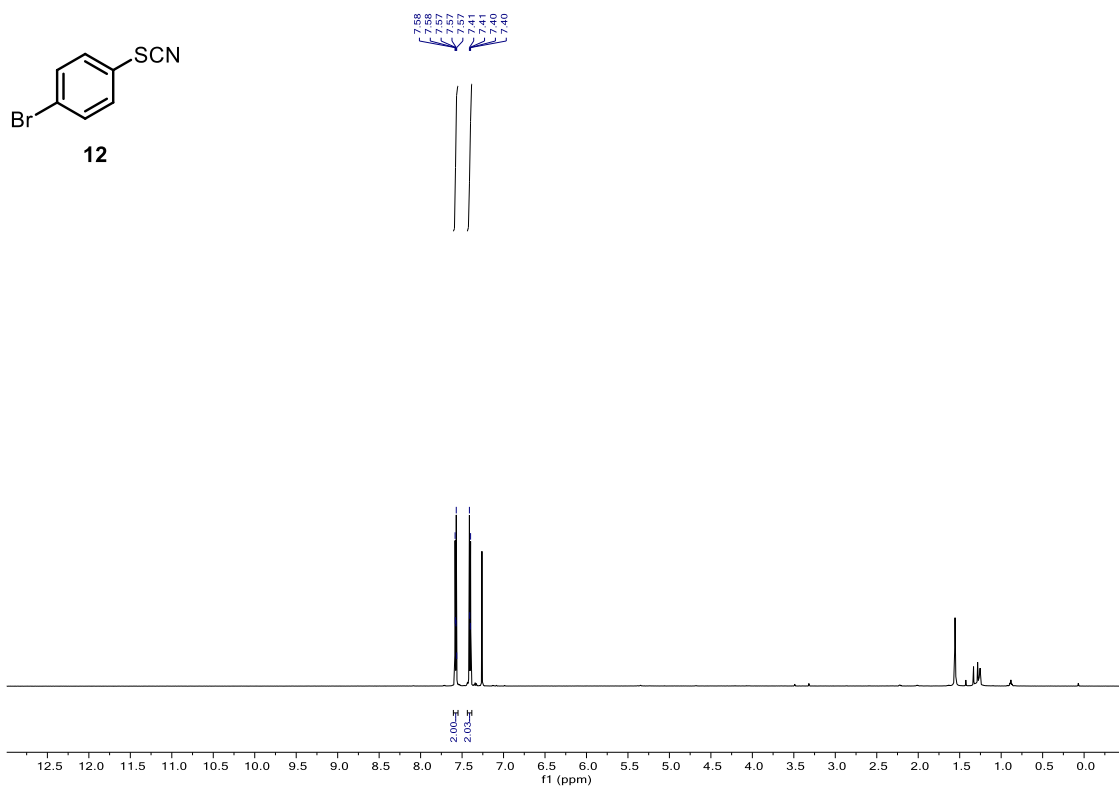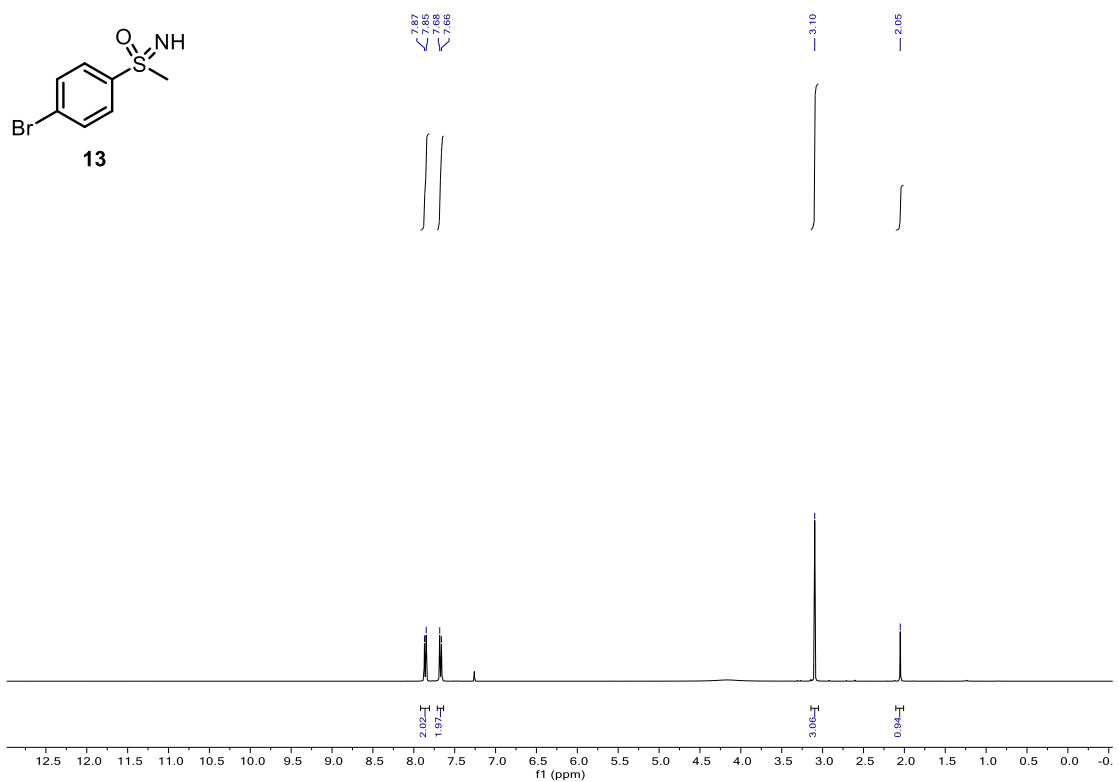

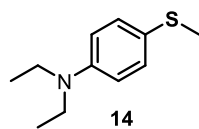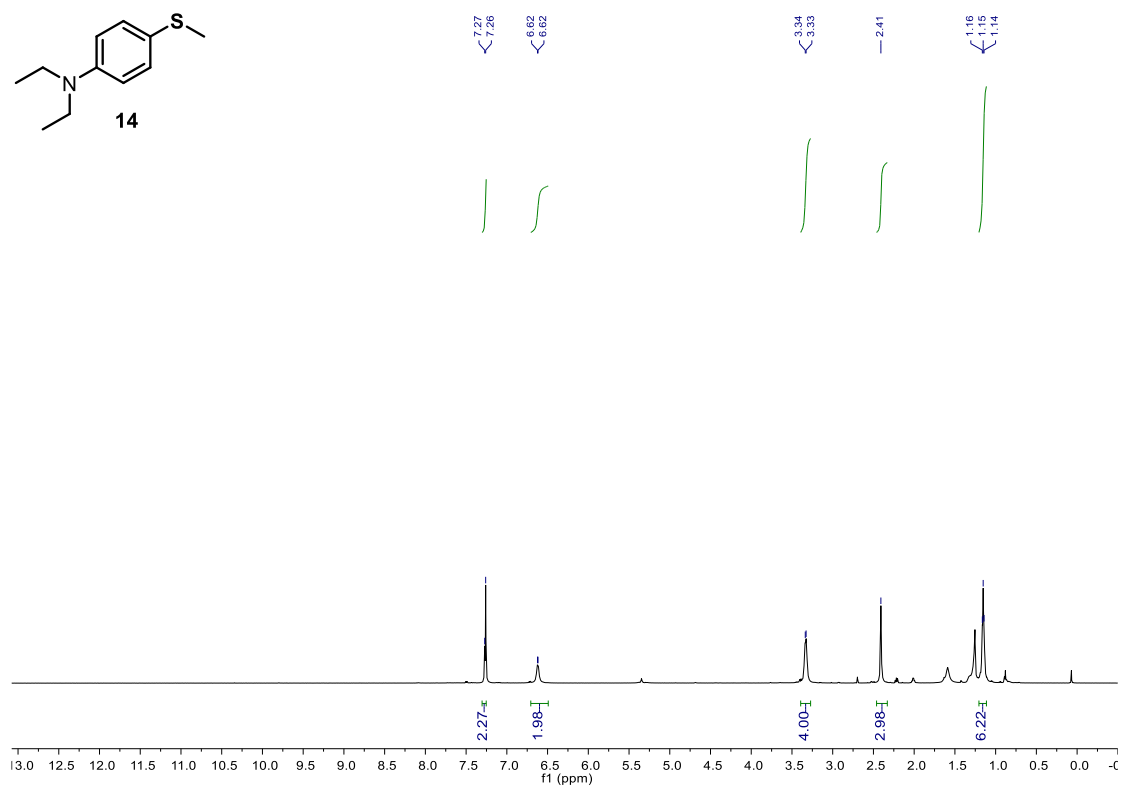

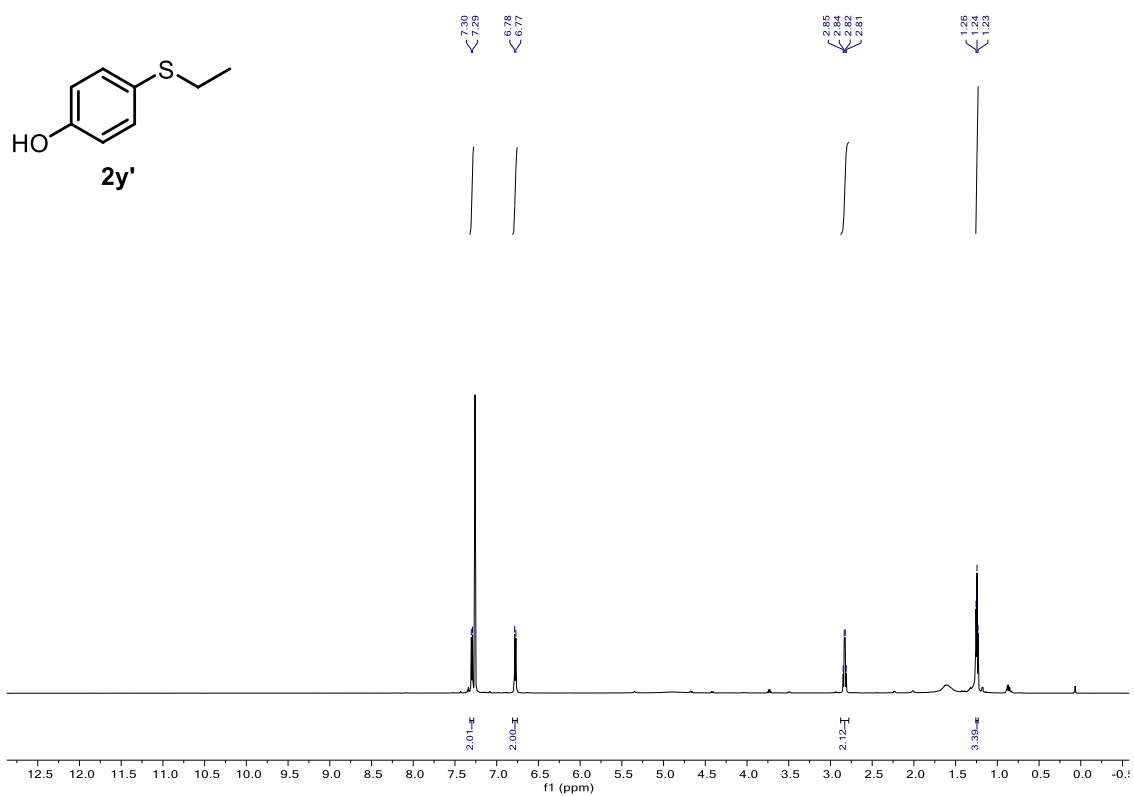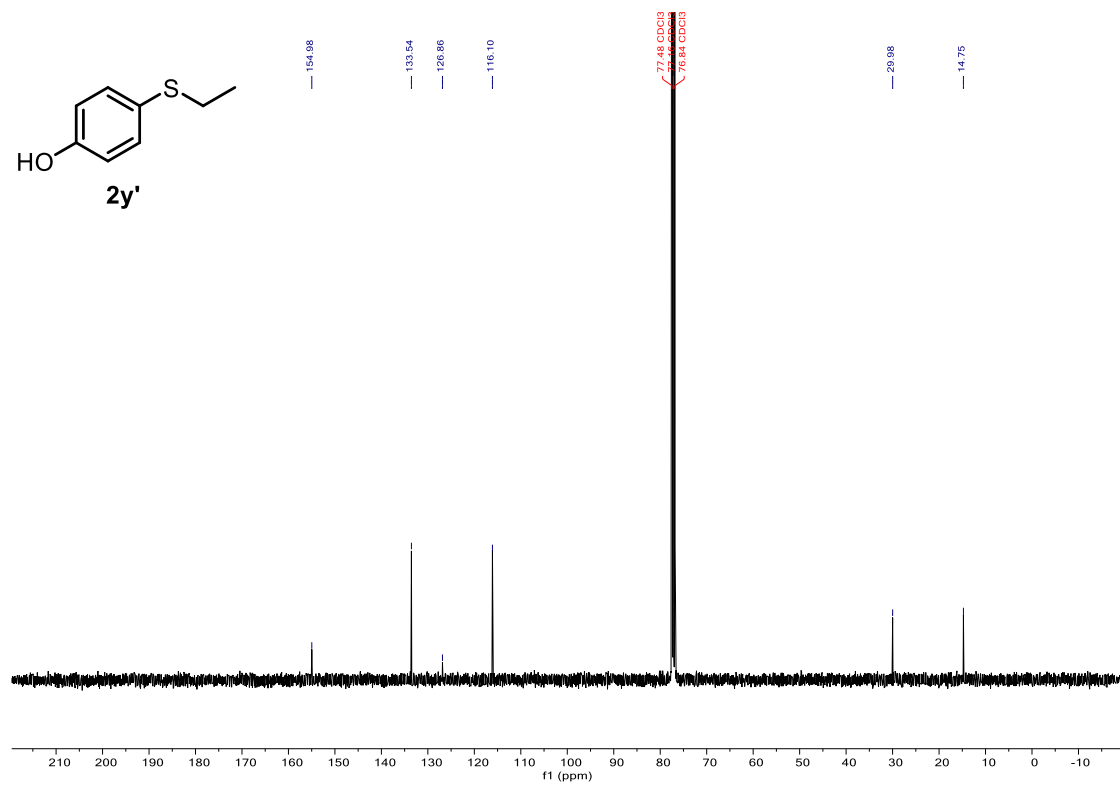



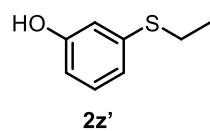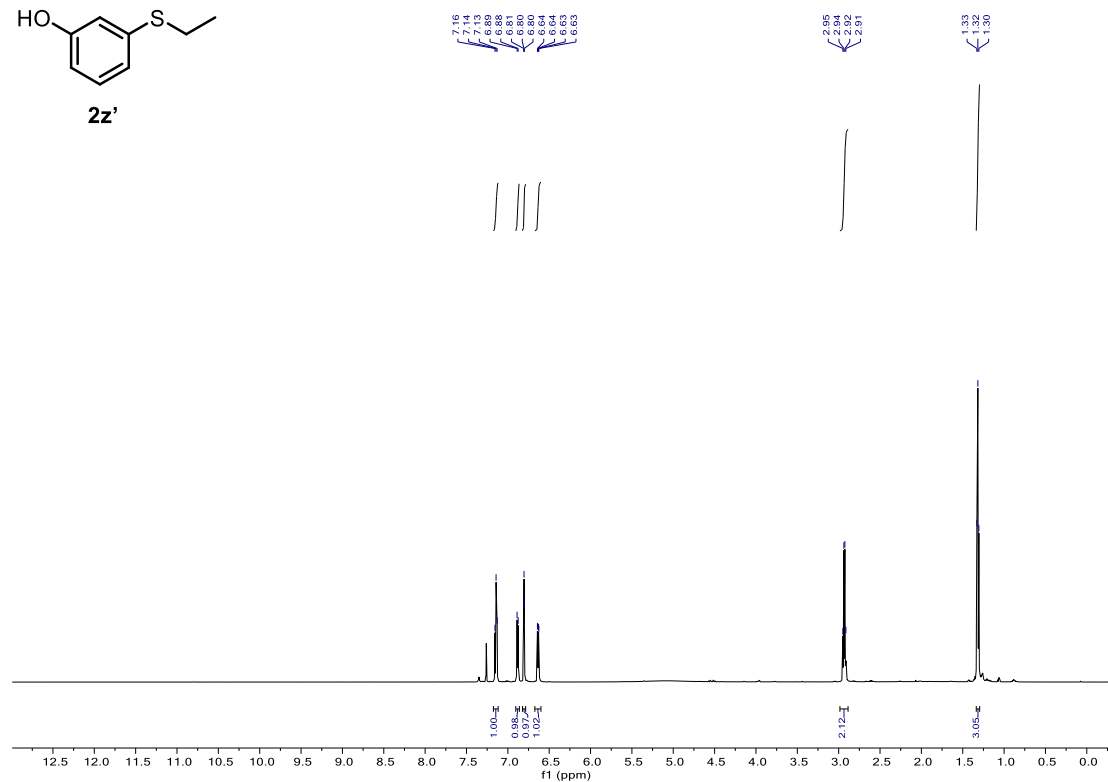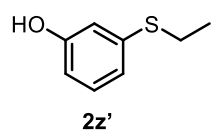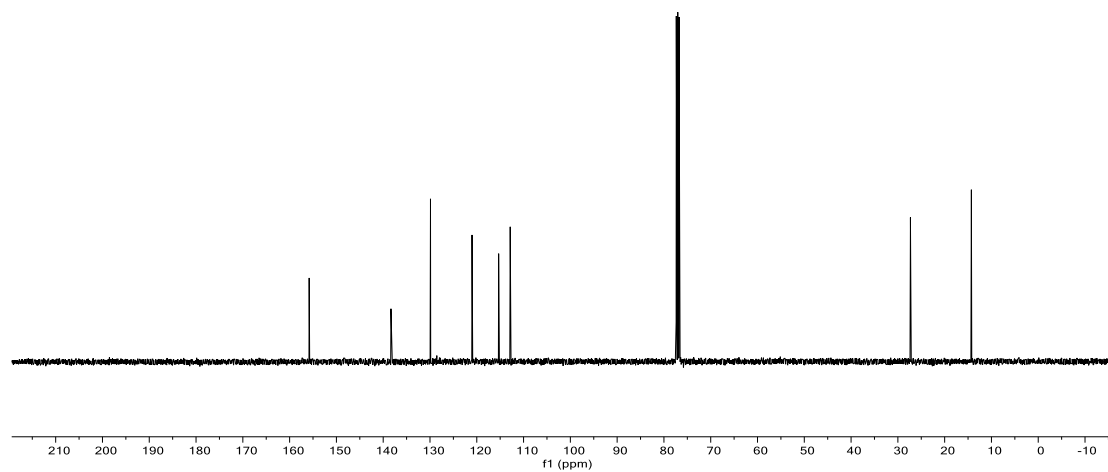

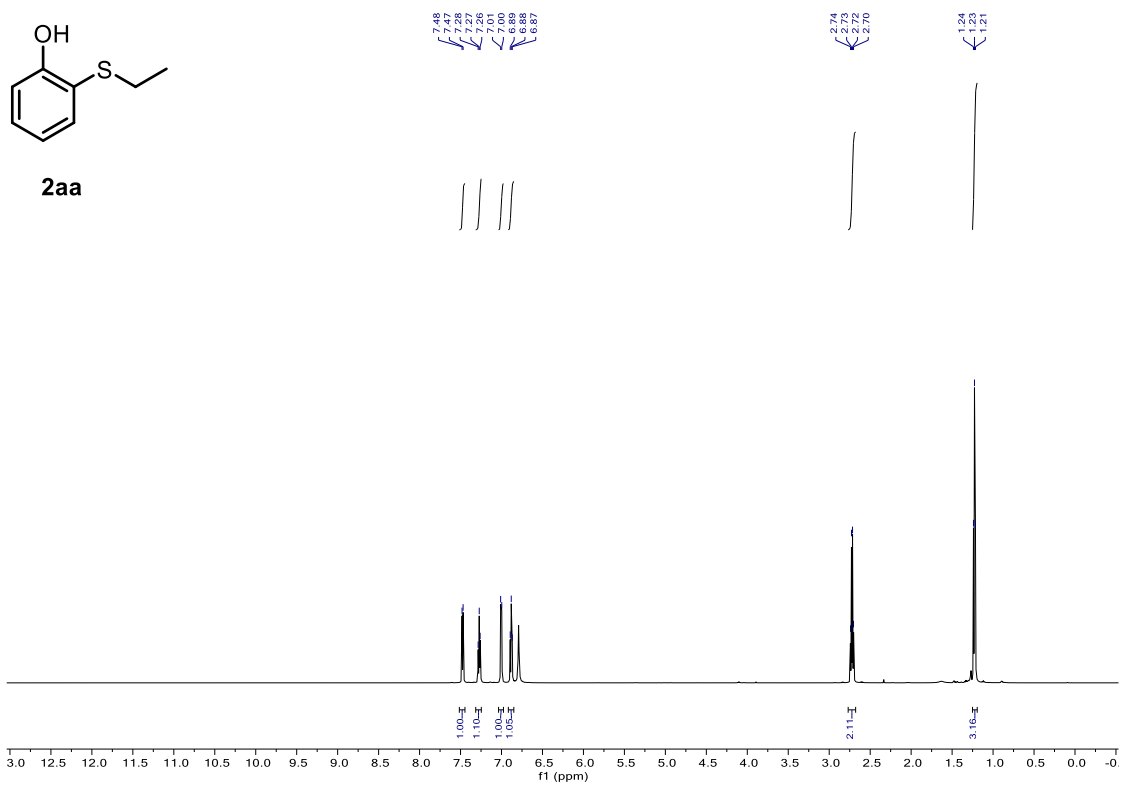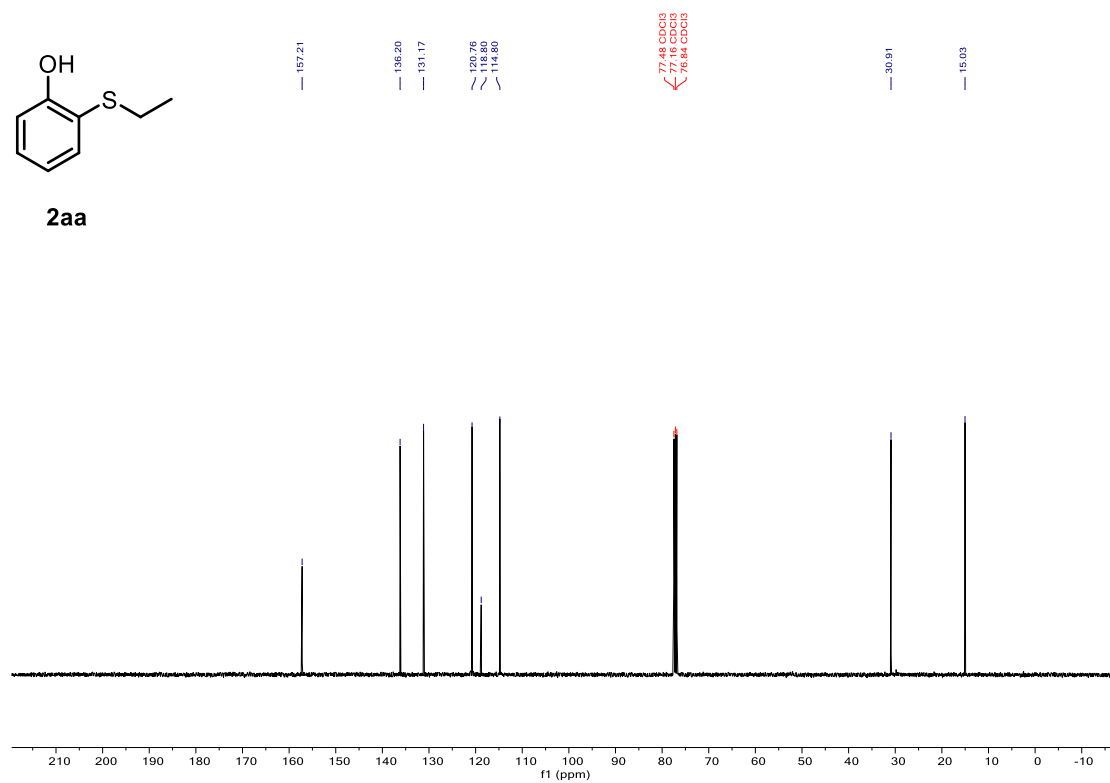

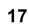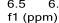

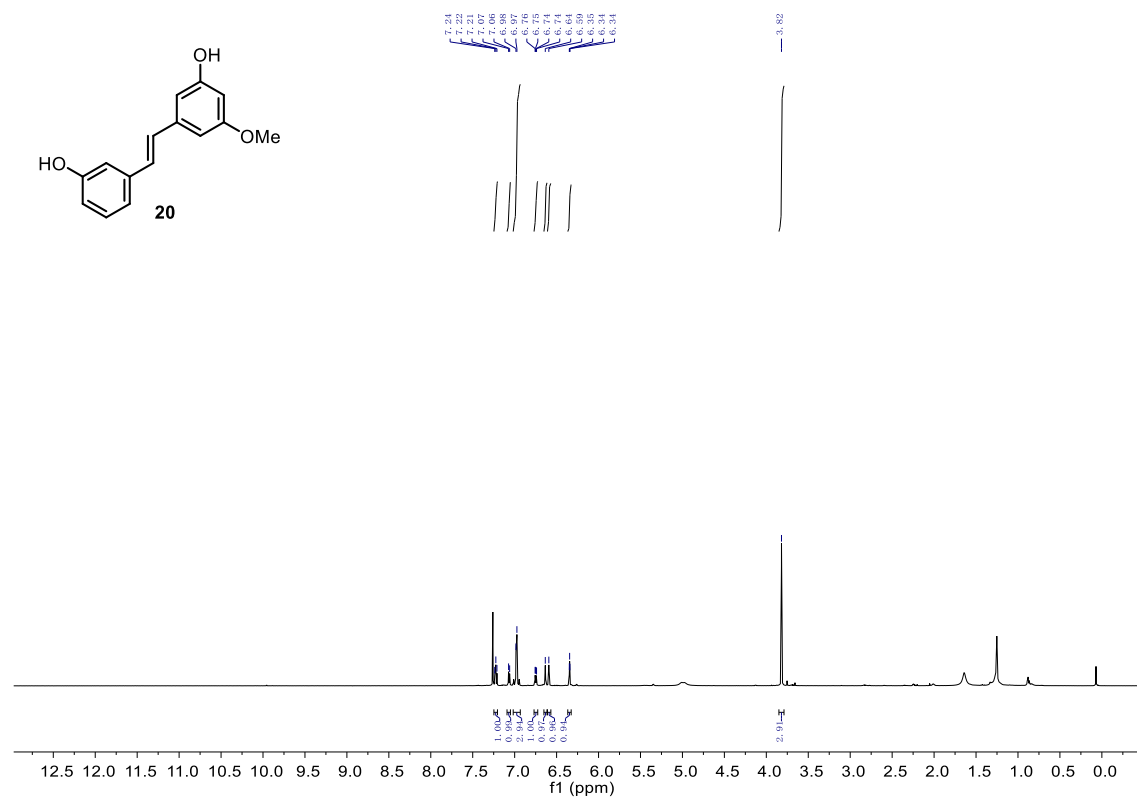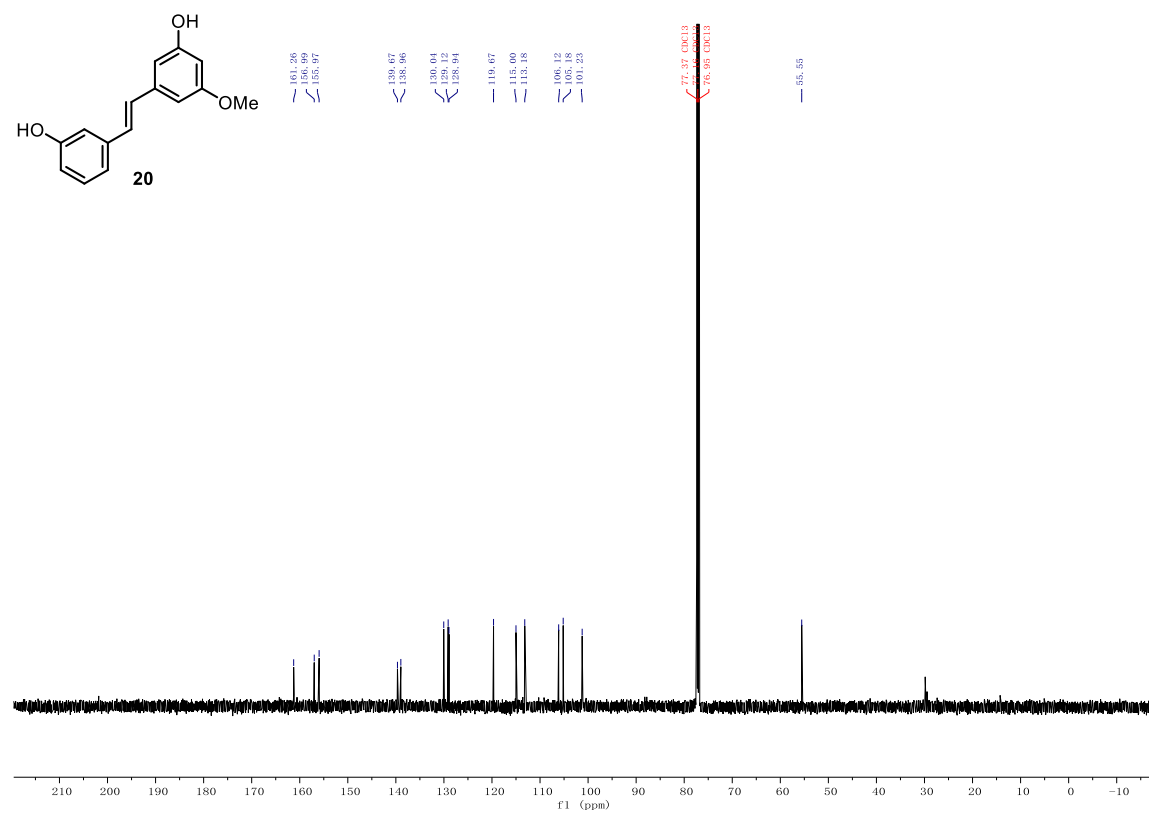

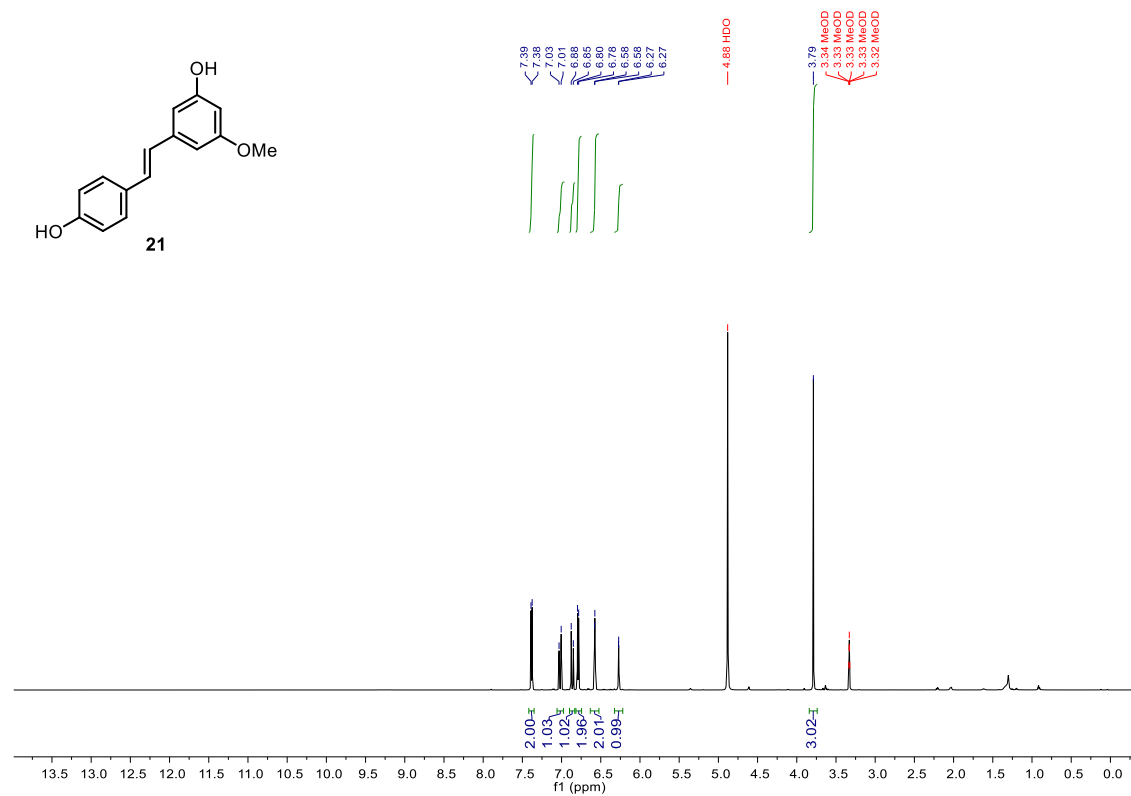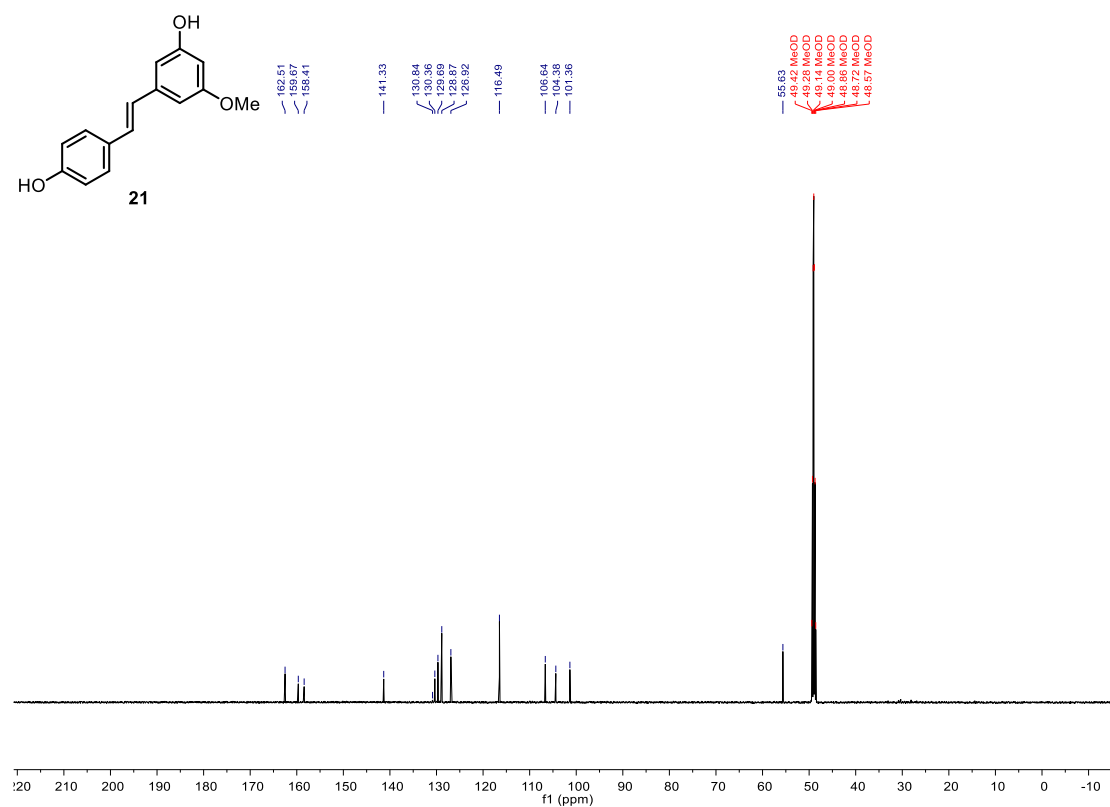

## 9 Reference

- (1) Shi, J.; Li, L.; Shan, C.; Chen, Z.; Dai, L.; Tan, M.; Lan, Y.; Li, Y. Benzyne 1,2,4-Trisubstitution and Dearomative 1,2,4-Trifunctionalization. *J. Am. Chem. Soc.* **2021**, *143*, 10530–10536.
- (2) Wang, S.; Zhang, K.; Li, H.; Xiao, L.-P.; Song, G. Selective hydrogenolysis of catechyl lignin into propenylcatechol over anatomically dispersed ruthenium catalyst. *Nat. Commun.* **2021**, *12*, 416.
- (3) Sako, M.; Aoki, T.; Zumbärgel, N.; Schober, L.; Gröger, H.; Takizawa, S.; Sasai, H. Chiral Dinuclear Vanadium Complex-Mediated Oxidative Coupling of Resorcinols. *J. Org. Chem.* **2019**, *84*, 1580–1587.
- (4) El-Deeb, I. Y.; Funakoshi, T.; Shimomoto, Y.; Matsubara, R.; Hayashi, M. Dehydrogenative Formation of Resorcinol Derivatives Using Pd/C–Ethylene Catalytic System. *J. Org. Chem.* **2017**, *82*, 2630–2640.
- (5) Uchida, K.; Yoshida, S.; Hosoya, T. Controlled Generation of 3-Triflyloxyarynes. *Synthesis* **2016**, *48*, 4099–4109.
- (6) Dol, G. C.; Kamer, P. C. J.; Leeuwen, P. W. N. M. Synthesis of 5-Substituted Resorcinol Derivatives via Cross-Coupling Reactions. *Eur. J. Org. Chem.* **1998**, *1998*, 359–364.
- (7) Miao, R.-G.; Qi, X.; Wu, X.-F. Synthesis of Aryl Methyl Sulfides from Arylsulfonyl Chlorides with Dimethyl Carbonate as the Solvent and C1 Source. *Eur. J. Org. Chem.* **2021**, *2021*, 5219–5221.
- (8) Xiao, X.; Huang, Y.-Q.; Tian, H.-Y.; Bai, J.; Cheng, F.; Wang, X.; Ke, M.-L.; Chen, F.-E. Robust, scalable construction of an electrophilic deuterated methylthiolating reagent: facile access to SCD<sub>3</sub>-containing scaffolds. *Chem. Commun.* **2022**, *58*, 3015–3018.
- (9) Shen, Z.; Zhang, S.; Geng, H.; Wang, J.; Zhang, X.; Zhou, A.; Yao, C.; Chen, X.; Wang, W. Trideuteromethylation Enabled by a Sulfoxonium Metathesis Reaction. *Org. Lett.* **2019**, *21*, 448–452.
- (10) Lu, W.; Li, W.; Zhou, Y.; Xie, Y.; Chen, W. Iridium(I)-catalyzed deoxygenation of

fluoroalkylsulfoxides with dimethyl diazomalonate to access fluoroalkylthioethers. *Chin. Chem. Lett.* **2022**, *33*, 4865–4869

(11) Wang, Y.-Y.; Wu, X.-M.; Yang, M.-H. Copper-Catalyzed Methylthiolation of Aryl Iodides and Bromides with Dimethyl Disulfide in Water. *Synlett.* **2020**, *31*, 1226–1230.

(12) Zhao, J.-W.; Luo, Z.-G.; Liu, Y.-P.; Chen, S.-T.; He, J.-Y.; Xu, J.-X.; Hu, W.-G.; Huang, Z.-N.; Xiong, W.-F. Visible light Induced Deoxygenation of Sulfoxides with Isopropanol. *Org. Chem. Front.*, **2023**, *10*, 5254–5259

(13) Lin, C.-H.; Chen, C.-C.; Wu, M.-J. Mercury(II)-Catalyzed Cyclization of 2-Akynylphenyl alkyl sulfoxides Provides 3-Acylbenzo[*b*]thiophenes *Chem.-Eur. J.* **2013**, *19*, 2578–2581.

(14) Pan, D.; Xu, S.; Tian, Q.; Li, Y. Pd-Catalyzed Intermolecular Transthioation of Ar-OTf Using Methyl 3-(Methylthio) Propanoate as a Thiol Surrogate. *Eur. J. Org. Chem.* **2021**, *2021*, 4616–4619.

(15) Li, Y.; Liu, L.; Shan, D.; Liang, F.; Wang, S.; Yu, L.; Liu, J.-Q.; Wang, Q.; Shao, X.; Zhu, D. *ACS Catal.* **2023**, *13*, 13474–13483

(16) Zhang, Y.; Ren, Y.; Zhang, J.; Liu, S.; Li, Y. Design, Synthesis and Application of a Robust *d*<sub>3</sub>-Methylthiolating Reagent *Chin. J. Chem.* **2023**, *41*, 3045–3049

(17) Czyz, M. L.; Weragoda, G. K.; Monaghan, R.; Connell, T. U.; Brzozowski, M.; Scully, A. D.; Burton, J.; Lupton, D. W.; Polyzos, A. Visible-light photocatalytic thiolation of aryl, heteroaryl and vinyl iodides. *Org. Biomol. Chem.* **2018**, *16*, 1543–1551.

(18) Luo, F.; Pan, C.-D.; Li, L.-P.; Chen, F.; Cheng, J. Copper-Mediated Methylthiolation of Aryl Halides with DMSO. *Chem. Commun.* **2011**, *47*, 5304–5306

(19) Huang, C.-M.; Li, J.; Ai, J.-J.; Liu, X.-Y.; Rao, W.-D.; Wang, S.-Y. Visible-Light-Promoted Cross-Coupling Reactions of Aryldiazonium Salts with S-Methyl-*d*<sub>3</sub> Sulfonylthioate or Se-Methyl-*d*<sub>3</sub> Selenium Sulfonate: Synthesis of Trideuteromethylated Sulfides, Sulfoxides, and Selenides. *Org. Lett.* **2020**, *22*, 9128–9132

(20) Cheng, S.-Y.; Liao, J.-B.; Lin, Y.-M.; Gong, L. Photochemical Synthesis of S, N, O-Containing Polyheterocycles via an  $\alpha$ -C(Sp<sup>3</sup>)-H Functionalization/Radical Cyclization Cascade. *Org. Lett.* **2023**, *25*, 6566–6570.

(21) Zhong, C.; Liu, M.; Qiu, X.; Wei, H.; Cui, B.; Shi, Y.; Cao, C. Nickel-catalyzed

Cross-coupling Reaction of Aryl Methyl Sulfides with Aryl Bromides. *J. Org. Chem.* **2023**, *88*, 13418–13426

(22) García, N.; Fernández-Rodríguez, M. A.; García-García, P.; Pedrosa, M. R.; Arnáiz, F. J.; Sanz, R. A practical and chemoselective Mo-catalysed sulfoxide reduction protocol using a 3-mercaptopropyl-functionalized silica gel (MPS) *RSC Adv.* **2016**, *6*, 27083–27086.

(23) Mouhsine, B.; Norlöff, M.; Ghouilem, J.; Sallustrau, A.; Taran, F.; Audisio, D. Platform for Multiple Isotope Labeling via Carbon–Sulfur Bond Exchange. *J. Am. Chem. Soc.* **2024**, *146*, 8343–8351.

(24) Xiao, X.; Huang, Y.-Q.; Tian, H.-Y.; Bai, J.; Cheng, F.; Wang, X.; Ke, M.-L.; Chen, F.-E. Robust, scalable construction of an electrophilic deuterated methylthiolating reagent: facile access to SCD<sub>3</sub>-containing scaffolds. *Chem. Commun.* **2022**, *58*, 3015–3018

(25) Merad, J.; Matyašovský, J.; Stopka, T.; Brutiu, B. R.; Pinto, A.; Drescher, M.; Maulide, N. Stable and easily available sulfide surrogates allow a stereoselective activation of alcohols. *Chem. Sci.* **2021**, *12*, 7770–7774.

(26) Wei, J.; Meng, J.; Zhang, C.; Liu, Y.; Jiao, N. Dioxygen-compatible electron donor-acceptor catalytic system and its enabled aerobic oxygenation. *Nat. Commun.* **2024**, *15*, 1886

(27) Zhao, X.; Deng, C. Y.; Meng, D.; Ji, H. W.; Chen, C. C.; Song, W. J.; Zhao, J. C. Nickel-Coordinated Carbon Nitride as a Metallaphotoredox Platform for the Cross-Coupling of Aryl Halides with Alcohols. *ACS Catal.* **2020**, *10*, 15178–15185

(28) Schulz, T.; Torborg, C.; Schäffner, B.; Huang, J.; Zapf, A.; Kadyrov, R.; Börner, A.; Beller, M. Practical imidazole-based phosphine ligands for selective palladium-catalyzed hydroxylation of aryl halides. *Angew. Chem., Int. Ed.* **2009**, *48*, 918–921.

(29) Kohlpaintner, P. J.; Marquart, L.; Gooßen, L. J.; Waldvogel, S. R. The Oxidation of Organo-Boron Compounds Using Electrochemically Generated Peroxodicarbonate. *Eur. J. Org. Chem.* **2023**, *26*, No. e202300220

(30) Ma, R.; Wang, Y.-E.; Xiong, D.; Mao, J. Mao, A Tandem Madelung Indole Synthesis Mediated by a LiN(SiMe<sub>3</sub>)<sub>2</sub>/CsF System. *Org. Lett.* **2023**, *25*, 7557–7561.



- (31) Liu, Y.; Lam, L. Y.; Ye, J.; Blanchard, N.; Ma, C. DABCO-promoted diaryl thioether formation by metal-catalyzed coupling of sodium sulfinates and aryl iodides. *Adv. Synth. Catal.* **2020**, *362*, 2326–2331.
- (32) Petsi, M.; Zografos, A. L. 2,5-Diketopiperazine Catalysts as Activators of Dioxygen in Oxidative Processes. *ACS Catal.* **2020**, *10*, 7093–7099
- (33) Chen, S.; Wen, Q.; Zhu, Y.; Ji, Y.; Pu, Y.; Liu, Z.; He, Y.; Feng, Z. Boron-promoted reductive deoxygenation coupling reaction of sulfonyl chlorides for the C(sp<sup>3</sup>)-S bond construction. *Chin. Chem. Lett.* **2022**, *33*, 5101–5105.
- (34) Mao, R.; Bera, S.; Turla, A. C.; Hu, X. Copper-Catalyzed Intermolecular Functionalization of Unactivated C(sp<sup>3</sup>)-H Bonds and Aliphatic Carboxylic Acids. *J. Am. Chem. Soc.* **2021**, *143*, 14667–14675.
- (35) Liu, Y.; Li, P.; Wang, Y.; Qiu, Y. Electroreductive Cross-Electrophile Coupling (eXEC) Reactions. *Angew. Chem., Int. Ed.* **2023**, *62*, No. e202306679
- (36) Zhao, X.; Bai, L.; Li, J.; Jiang, X. Photouranium Catalyzed C–F Activation Hydroxylation via Water Splitting. *J. Am. Chem. Soc.* **2024**, *146*, 11173–11180
- (37) Mori, K.; Ichikawa, Y.; Kobayashi, M.; Shibata, Y.; Yamanaka, M.; Akiyama, T. Prediction of Suitable Catalyst by <sup>1</sup>H NMR: Asymmetric Synthesis of Multisubstituted Biaryls by Chiral Phosphoric Acid Catalyzed Asymmetric Bromination. *Chem. Sci.* **2013**, *4*, 4235–4239.
- (38) Shi, J.; Li, L.; Shan, C.; Chen, Z.; Dai, L.; Tan, M.; Lan, Y.; Li, Y. Benzyne 1,2,4-Trisubstitution and Dearomative 1,2,4-Trifunctionalization. *J. Am. Chem. Soc.* **2021**, *143*, 10530–10536.
- (39) Greb, J.; Drennhaus, T.; Klischan, M. K. T.; Schroeder, Z. W.; Frey, W.; Pietruszka, J. A Common C<sub>2</sub> Symmetric 2,2' Biphenol Building Block and its Application in the Synthesis of (+) diepiGonytolide A. *Chem.–Eur. J.* **2023**, *29*, e202300941.
- (40) Gedawy, E.M.; Kassab, A.E.; El Kerdawy, A.M. Design, synthesis and biological evaluation of novel pyrazole sulfonamide derivatives as dual COX-2/5-LOX inhibitors. *Eur. J. Med. Chem.* **2020**, *189*, 112066
- (41) Itagaki, N.; Sugahara, T.; Iwabuchi, Y. Expedient synthesis of potent cannabinoid receptor agonist (-)-CP55, 940 *Org. Lett.* **2005**, *7*, 4181–4183.

- (42) Xia, S.; Gan, L.; Wang, K.; Li, Z.; Ma, D. Copper-Catalyzed Hydroxylation of (Hetero)aryl Halides under Mild Conditions. *J. Am. Chem. Soc.* **2016**, *138*, 13493–13496.
- (43) Lindgren, A. E. G.; Öberg, C. T.; Hillgren, J. M.; Elofsson, M. Total Synthesis of the Resveratrol Oligomers (±)-Ampelopsin B and (±)- $\epsilon$ -Viniferin. *Eur. J. Org. Chem.*, **2016**, *2016*, 426–429
- (44) El-Deeb, I. Y.; Funakoshi, T.; Shimomoto, Y.; Matsubara, R.; Hayashi, M. Dehydrogenative Formation of Resorcinol Derivatives Using Pd/C–Ethylene Catalytic System. *J. Org. Chem.* **2017**, *82*, 2630–2640
- (45) Zhang, M. X.; Hu, X. H.; Xu, Y. H.; Loh, T. P. Selective dealkylation of alkyl aryl ethers. *Asian J. Org. Chem.* **2015**, *4*, 1047–1049.
- (46) Lee, D.-H.; Kwon, K.-H.; Yi, C. S. Dehydrative C-H alkylation and alkenylation of phenols with alcohols: Expedient synthesis for substituted phenols and benzofurans. *J. Am. Chem. Soc.* **2012**, *134*, 7325–7328.
- (47) Pallavicini, M.; Fumagalli, L.; Gobbi, M.; Bolchi, C.; Colleoni, S.; Moroni, B.; Pedretti, A.; Rusconi, C.; Vistoli, G.; Valoti, E. *Eur. J. Med. Chem.* **2006**, *41*, 1025–1040.
- (48) Vitaku, E.; Njardarson, J. T. A Mild Meta-Selective C–H Alkylation of Catechol Mono-Ethers. *Eur. J. Org. Chem.* **2016**, *2016*, 3679–3683.
- (49) Umekubo, N.; Yokoshima, S. Total Syntheses of Malettinins C and E. *Org. Lett.* **2023**, *25*, 4530–4533.
- (50) Zang, Y.; Ma, Y.; Xu, Q.; Li, G.; Chen, N.; Li, X.; Zhu, F. Aryl carbonyls and carbinols as proelectrophiles for Friedel–Crafts benzylation and alkylation *Org. Biomol. Chem.*, **2024**, *22*, 932–939.
- (51) Li, W.; Gao, G.; Gao, Y.; Yang, C.; Xia, W. Direct oxidation of the C(sp<sup>2</sup>)–C(sp<sup>3</sup>) bond from benzyltrimethylsilanes to phenols. *Chem. Commun.* **2017**, *53*, 5291–5293.
- (52) Zhang, H.; Xu, X.; Chen, Y.; Qiu, Y.; Liu, X.; Liu, B.-F.; Zhang, G. Phenyl acetate derivatives, fluorine-substituted on the phenyl group, as rapid recovery hypnotic agents with reflex depression *Eur. J. Med. Chem.* **2015**, *89*, 524–539.
- (53) Long, H.; Chen, T.-S.; Song, J.; Zhu, S.; Xu, H.-C. Electrochemical aromatic C–H hydroxylation in continuous flow. *Nat. Commun.* **2022**, *13*, 3945–3951.

- (54) Cheng, J.; Zhu, M.; Wang, C.; Li, J.; Jiang, X.; Wei, Y.; Tang, W.; Xue, D.; Xiao, J. Chemoselective Dehydrogenative Esterification of Aldehydes and Alcohols with a Dimeric Rhodium(II) Catalyst. *Chem. Sci.* **2016**, *7*, 4428–4434.
- (55) Antoniuk, D.; Barbasiewicz, M. Alkylation of Nitropyridines via Vicarious Nucleophilic Substitution. *Org. Lett.* **2022**, *24*, 516–519.
- (56) Lipton, M. F.; Mauragis, M. A.; Maloney, M. T.; Veley, M. F.; VanderBor, D. W.; Newby, J. J.; Appell, R. B.; Daus, E. D. The Synthesis of OSU 6162: Efficient, Large-Scale Implementation of a Suzuki Coupling. *Org. Process Res. Dev.* **2003**, *7*, 385–392.
- (57) Campbell, P. S.; Jamieson, C.; Simpson, I.; Watson, A. J. B. Practical synthesis of pharmaceutically relevant molecules enriched in  $sp^3$  character. *Chem. Commun.* **2018**, *54*, 46–49.
- (58) Speckmeier, E.; Maier, T. C. ART–An Amino Radical Transfer Strategy for  $C(sp^2)$ – $C(sp^3)$  Coupling Reactions, Enabled by Dual Photo/Nickel Catalysis. *J. Am. Chem. Soc.* **2022**, *144*, 9997–10005.
- (59) Wu, B.; He, Y.; Neyuen, T.; Kuhen, K. L.; Ellis, D. A.; Jiang, T. Pyrrolidones with *anti*-HIV activity WO2004037784A2.
- (60) Chen, Y.; Qi, H.; Chen, N.; Ren, D.; Xu, J.; Yang, Z. Fluorine-Initiated Dealkylative Cyanation of Thioethers to Thiocyanates. *J. Org. Chem.* **2019**, *84*, 9044–9050.
- (61) Su, W.; Xu, P.; Petzold, R.; Yan, J.; Ritter, T. Ligand-to-Copper Charge-Transfer-Enabled C–H Sulfoximation of Arenes. *Org. Lett.* **2023**, *25*, 1025–1029.
- (62) Zhang, Y.; Yang, X.; Yao, Q.; Ma, D. CuI/DMPAO-Catalyzed N-Arylation of Acyclic Secondary Amines. *Org. Lett.* **2012**, *14*, 3056–3059.
- (63) Li, H.; Qin, L.; Nie, J.; Jiang, H.; Zhu, C. Fluoroolefins-Mediated Deoxygenative Substitution of Alcohols: Chemo- and Enantiospecific Construction of C–S, C–N, C–O, and C–Se Bonds. *Org. Lett.* **2023**, *25*, 5431–5436.
- (64) Bailey, S.; Barber, C. G.; Glossop, P. A.; Middleton, D. S. A preparation of nicotinamide derivatives, useful as PDE4 inhibitors WO2005009966 A1
- (65) Chen, Y.; Xiao, F.; Chen, H.; Liu, S.; Deng, G.-J. Iodine-promoted 2-arylsulfanyphenol formation using cyclohexanones as phenol source. *RSC Adv.* **2014**,

- (66) Nakao, S.; Mabuchi, M.; Wang, S.; Kogure, Y.; Shimizu, T.; Noguchi, K.; Tanaka, A.; Dai, Y. Synthesis of Resveratrol Derivatives as New Analgesic Drugs Through Desensitization of the TRPA1 Receptor. *Bioorg. Med. Chem. Lett.* **2017**, *27*, 3167–3172.
- (67) Jeon, J. G.; Moon, I. S. Method for the preparation of phoyunbene A-D and thunalbene. KR2016115127 A
- (68) Paul, S. C.; Mizuno, S.; Lee, H. J.; Zheng, X.; Chajkowisk, S.; Rimoldi, J. M.; Conney, A.; Suh, N.; Rimando, A. M. In vitro and invivo studies on stilbene analogs as potential treatment agents for colon cancer. *Eur. J. Med. Chem.* **2010**, *45*, 3702–3708.
- (69) Frisch, M. J. T.; Trucks, G. W.; Schlegel, H. B.; Scuseria, G. E.; Robb, M. A.; Cheeseman, J. R.; Scalmani, G.; Barone, V.; Petersson, G. A.; Nakatsuji, H.; Li, X.; Caricato, M.; Marenich, A. V.; Bloino, J.; Janesko, B. G.; Gomperts, R.; Mennucci, B.; Hratchian, H. P.; Ortiz, J. V.; Izmaylov, A. F.; Sonnenberg, J. L.; Williams-Young, D.; Ding, F.; Lipparini, F.; Egidi, F.; Goings, J.; Peng, B.; Petrone, A.; Henderson, T.; Ranasinghe, D.; Zakrzewski, V. G.; Gao, J.; Rega, N.; Zheng, G.; Liang, W.; Hada, M.; Ehara, M.; Toyota, K.; Fukuda, R.; Hasegawa, J.; Ishida, M.; Nakajima, T.; Honda, Y.; Kitao, O.; Nakai, H.; Vreven, T.; Throssell, K.; Montgomery, J. A., Jr.; Peralta, J. E.; Ogliaro, F.; Bearpark, M. J.; Heyd, J. J.; Brothers, E. N.; Kudin, K. N.; Staroverov, V. N.; Keith, T. A.; Kobayashi, R.; Normand, J.; Raghavachari, K.; Rendell, A. P.; Burant, J. C.; Iyengar, S. S.; Tomasi, J.; Cossi, M.; Millam, J. M.; Klene, M.; Adamo, C.; Cammi, R.; Ochterski, J. W.; Martin, R. L.; Morokuma, K.; Farkas, O.; Foresman, J. B.; Fox, D. J. Gaussian 16. revision A.03; Gaussian, Inc.: Wallingford, CT, **(2016)**.
- (70) Lee, C.; Yang, W.; Parr, R. G.; Development of the Colle-Salvetti correlation-energy formula into a functional of the electron density. *Phys. Rev. B*, **1988**, *37*, 785–789
- (71) Becke, A. D. Density-functional thermochemistry. III. The role of exact exchange. *J. Chem. Phys.* **1993**, *98*, 5648–5652
- (72) Grimme, S.; Ehrlich, S.; Goerigk, L. Effect of the damping function in dispersion corrected density functional theory. *J. Comput. Chem.* **2011**, *32*, 1456–1465

- (73) Grimme, S.; Antony, J.; Ehrlich, S.; Krieg, H. A consistent and accurate ab initio parametrization of density functional dispersion correction (DFT-D) for the 94 elements H-Pu. *J. Chem. Phys.* **2010**, *132*, 154104–154123
- (74) Nicklass, A.; Dolg, M.; Stoll, H.; Preuss, H. Ab initio energy-adjusted pseudopotentials for the noble gases Ne through Xe: Calculation of atomic dipole and quadrupole polarizabilities. *J. Chem. Phys.* **1995**, *102*, 8942–8952
- (75) Thermochemistry was corrected with the Head–Gordon and Grimme corrections using GoodVibes version 3.0.1 (ref. 8), with quasi-harmonic approximations to enthalpy and corrected at 423.15 K.
- (76) Luchini, G.; Alegre-Requena, J.V.; Funes-Ardoiz, I.; Paton, R.S.; GoodVibes, Version 3.0.1. **2020**. <https://doi.org/10.12688/f1000research.22758.1>
- (77) Marenich, A. V.; Cramer, C. J.; Truhlar, D. G. Universal Solvation Model Based on Solute Electron Density and on a Continuum Model of the Solvent Defined by the Bulk Dielectric Constant and Atomic Surface Tensions. *J. Phys. Chem. B*, **2009**, *113*, 6378–6396
